# Supplementary material for: Vagus nerve stimulation modulates LPS-induced epileptogenicity: the role of inflammation suppression
Source: Research Square preprint supplement (doi:10.21203/rs.3.rs-8896240/v1), 2026-04-20
Supplement: Supplementary file 1 [file 097c2eea8e88681ac36d8276.xlsx]

## Sheet: Experiment 1 Animals
Animal Information							Blood Collection	Cuff Implant					LPS Injection		LPS Injection 1				LPS Injection 2			LPS Injection 3				LPS Injection 4			LPS Injection 5				Kindling		Perfusion
Animal Name	Cohort	Description	Arrival Date	Arrival Weight	Sex	Group	Blood Collection 1	Cuff Implanted	Device	Weight	Surgeon	Notes	LPS Injection Start	LPS amount	Weight	LPS Time	VNS 1 Time	Blood Collection 2	Weight	LPS Time	VNS 2 Time	Weight	LPS Time	VNS 3 Time	Blood Collection 3	Weight	LPS Time	VNS 4 Time	Weight	LPS Time	VNS 5 Time	Blood Collection 4	PTZ (mg/mL)	Notes	Total Euthapen	First Inject	Time	Time to PBS	PBS Infusion	PFA Infusion	Time to Fix
LPS33	1	broken base of tail	2024-02-27	200-224	F	LPS	10:34:00	2024-03-11	1	227	GLL	Pica - died
LPS34	1	solid base	2024-02-27	200-224	F	LPS	10:55:00	2024-03-11	7	239	SRK		2024-03-19	0.07	233	12:08:00	12:38:00	16:25:00	227	12:04:00	12:34:00	227	09:38:00	10:07:00	13:52:00	237	07:19:00	07:52:00	237	12:01:00	12:32:00	16:25:00	9.952		0.081	16:50:00	17:25:00	01:22:00	02:30:00	15:00:00	47
LPS35	1	light tail	2024-02-27	240-274	M	VNS	10:55:00	2024-03-12	good2	350	GLL	needed resutured	2024-03-20	0.1	339	11:06:00	11:38:00	15:02:00	312	10:34:00	11:02:00	306	07:18:00	07:52:00	11:35:00	306	12:17:00	12:46:00	304	11:32:00	12:01:00	15:30:00	9.997		0.078	15:50:00	16:05:00	01:36:00	02:10:00	15:00:00	32
LPS36	1	dark tail	2024-02-27	240-274	M	VNS	11:00:00	2024-03-12	good1	379	SRK		2024-03-20	0.12	387	11:22:00	11:52:00	15:17:00	360	10:47:00	11:17:00	341	07:35:00	08:06:00	11:42:00	334	13:00:00	13:30:00	339	12:29:00	13:00:00	16:30:00	9.997		0.127	16:54:00		01:46:00	02:28:00	15:00:00	43
LPS37	1	darker tail	2024-02-27	200-224	F	LPS	09:49:00	2024-03-13	8	241	GLL		2024-03-21	0.07	232	10:12:00	10:40:00	14:25:00	215	07:36:00	08:08:00	215	11:05:00	11:36:00	15:09:00	219	11:08:00	11:38:00	219	11:03:00	11:36:00	15:20:00	10.143		0.089	15:35:00	15:59:00	01:25:00	01:28:00	15:00:00	43
LPS38	1	lighter tail	2024-02-27	200-224	F	LPS	12:30:00	2024-03-13	5	258	SRK		2024-03-21	0.074	245	09:57:00	10:27:00	14:08:00	245	08:17:00	08:47:00	230	11:17:00	11:47:00	Complications - Euthanized
LPS39	1	light tail	2024-02-27	240-274	M	VNS	09:50:00	2024-03-14	good3	358	GLL		2024-03-22	0.11	353	07:48:00	08:18:00	11:51:00	339	13:16:00	13:45:00	328	11:00:00	11:30:00	15:05:00	332	10:38:00	11:09:00	326	09:33:00	10:04:00	13:40:00	10.139		0.085	13:49:00	14:22:00	01:52:00	02:23:00	15:00:00	35
LPS40	1	dark tail	2024-02-27	240-274	M	VNS	14:00:00	2024-03-14	good4	390	SRK	Pica - resolved	2024-03-22	0.011	361	08:00:00	08:32:00	12:01:00	328	13:32:00	14:00:00	326	11:15:00	11:45:00	15:23:00	330	10:54:00	11:28:00	322	10:32:00	10:59:00	14:49:00	10.139		0.085	14:59:00		01:22:00	02:00:00	15:00:00	50
LPS41	1	light tail	2024-02-27	200-224	F	LPS	10:00:00	2024-03-15	9	238	GLL		2024-03-23	0.07	230	11:32:00	12:02:00	15:40:00	231	11:23:00	11:48:00	217	10:32:00	11:01:00	14:34:00	222	09:47:00	10:16:00	227	09:21:00	09:55:00	13:45:00	10.12	Bit hole in cath	0.06	14:00:00	14:16:00	01:32:00	01:30:00	15:00:00	52
LPS42	1	dark tail	2024-02-27	200-224	F	VNS	13:32:00	2024-03-15	meh1	239	SRK		2024-03-23	0.07	230	11:46:00	12:17:00	15:55:00	228	12:15:00	12:47:00	222	10:45:00	11:18:00	14:49:00	222	10:01:00	10:31:00	227	10:30:00	11:00:00	14:45:00	10.12		0.1	14:54:00	15:30:00	02:15:00	01:55:00	15:00:00	32
LPS43	2	spot on back right	2024-04-24	250-274	M	CTRL	09:48:00	2024-04-29	7	311	SRK	Little pica - resolved	2024-05-06	0.092	303	09:14:00	09:44:00	13:20:00	303	09:21:00	09:51:00	307	10:00:00	10:31:00	14:04:00	303	09:14:00	09:44:00	294	10:30:00	11:00:00	14:33:00	9.98348		0.13	14:46:00	15:50:00	01:23:00	01:35:00	15:00:00	41
LPS44	2	no spot, belly spot	2024-04-24	250-274	M	LPS	13:10:00	2024-04-29	3	300	GLL		2024-05-06	0.095	317	09:36:00	10:06:00	13:36:00	317	09:11:00	09:41:00	320	10:15:00	10:47:00	14:16:00	296	09:25:00	09:56:00	302	11:39:00	12:09:00	15:20:00	9.98348		0.12	15:31:00		01:38:00	02:00:00	15:00:00	45
LPS45	2	solid back	2024-04-24	200-224	F	LPS	10:11:00	2024-04-30	4	247	SRK		2024-05-07	0.072	239	09:31:00	10:01:00	13:32:00	226	09:15:00	09:46:00	224	10:00:00	10:31:00	14:12:00	222	10:40:00	11:10:00	227	11:15:00	11:46:00	16:15:00	9.9597		0.08	16:00:00	16:35:00	01:32:00	01:45:00	15:00:00	40
LPS46	2	break in back	2024-04-24	200-224	F	CTRL	10:25:00	2024-04-30	5	267	GLL		2024-05-07	0.077	256	09:55:00	10:25:00	13:56:00	263	09:26:00	09:57:00	253	10:14:00	10:45:00	14:21:00	249	10:50:00	11:20:00	254	11:45:00	12:16:00	16:00:00	9.9597		0.065	16:23:00	16:55:00	02:30:00	02:00:00	15:00:00	40
LPS47	2	breaks in back, lighter tail	2024-04-24	250-274	M	LPS	10:00:00	2024-05-01	2	344	SRK		2024-05-08	0.11	352	10:30:00	11:02:00	14:33:00	318	09:33:00	10:05:00	315	09:32:00	10:03:00	13:31:00	311	11:55:00	12:26:00	309	09:34:00	10:03:00	13:47:00	10.057		0.11	13:55:00	14:23:00	01:38:00	02:38:00	15:00:00	38
LPS48	2	solid back, darker tail	2024-04-24	250-274	M	CTRL	10:18:00	2024-05-01	1	345	GLL		2024-05-08	0.11	351	10:45:00	11:15:00	14:48:00	344	09:44:00	10:14:00	345	09:41:00	10:12:00	13:42:00	336	12:04:00	12:36:00	340	10:30:00	11:00:00	14:35:00	10.057		0.167	15:07:00	16:04:00	01:54:00	02:29:00	15:00:00	30
LPS49	2	solid back	2024-04-24	200-224	F	CTRL	08:58:00	2024-05-02	9	227	SRK		2024-05-09	0.065	215	10:30:00	11:00:00	14:35:00	209	11:00:00	11:31:00	209	10:47:00	11:21:00	14:55:00	213	09:40:00	10:12:00	216	09:45:00	10:15:00	14:00:00	10.09		0.055	14:06:00	14:10:00	01:40:00	02:00:00	15:00:00	40
LPS50	2	break in back	2024-04-24	200-224	F	CTRL	09:23:00	2024-05-02	8	242	GLL	Pica, Bleeding legs on 5/4, separated from cage mate	2024-05-09	0.067	224	10:45:00	11:15:00	15:03:00	217	11:10:00	11:43:00	216	10:57:00	11:27:00	15:10:00	213	10:00:00	10:31:00	215	10:15:00	10:45:00	14:27:00	10.09		0.1	14:37:00	15:12:00	01:43:00	01:40:00	15:00:00	30
LPS51	2	light tail	2024-04-24	250-274	M	LPS	08:35:00	2024-05-03	bad1	331	SRK		2024-05-10	0.1	335	09:50:00	10:20:00	14:05:00	305	12:16:00	12:46:00	300	09:51:00	10:21:00	14:03:00	299	09:56:00	10:26:00	297	10:45:00	11:15:00	14:54:00	10		0.1	15:00:00	15:35:00	01:24:00	01:40:00	15:00:00	40
LPS52	2	dark tail	2024-04-24	250-274	M	CTRL	08:44:00	2024-05-03	6	327	GLL	Loosing weight and gurgling through 3 days post-op, started gaining on 5/7	2024-05-10	0.089	295	09:59:00	10:30:00	14:09:00	298	12:26:00	12:55:00	300	10:12:00	10:42:00	14:10:00	303	10:05:00	10:35:00	300	10:04:00	10:34:00	14:14:00	10		0.11	14:23:00	15:05:00	01:07:00	01:40:00	15:00:00	38
LPS53	3	light tail	2024-05-14	200-224	F	CTRL	13:04:00	2024-05-20	2	221	GLL		2024-05-27	0.061	203	09:30:00	10:02:00	13:44:00	206	09:10:00	09:41:00	209	10:00:00	10:30:00	14:19:00	215	10:06:00	10:36:00	211	10:59:00	11:30:00	15:14:00	10.16		0.054	15:20:00	15:38:00	01:55:00	02:00:00	15:00:00	40
LPS54	3	darker tail	2024-05-14	200-224	F	VNS	12:48:00	2024-05-20	61	219	GLL		2024-05-27	0.066	216	09:40:00	10:10:00	14:00:00	200	09:25:00	09:56:00	206	10:20:00	10:52:00	14:30:00	203	10:25:00	10:57:00	209	11:59:00	12:30:00	16:04:00	10.16		0.056	16:10:00	16:23:00	01:30:00	01:45:00	15:00:00	45
LPS55	3	splotchy tail	2024-05-14	250-274	M	LPS	09:37:00	2024-05-21	6	287	GLL		2024-05-28	0.087	291	09:20:00	09:51:00	13:25:00	263	09:50:00	10:20:00	257	09:55:00	10:27:00	13:56:00	257	10:10:00	10:40:00	270	08:15:00	08:48:00	13:43:00	10.06		0.069	13:00:00	13:30:00	01:38:00	03:30:00	15:00:00	42
LPS56	3	1/2 - 1/2 tail	2024-05-14	250-274	M	VNS	09:47:00	2024-05-21	56	299	GLL		2024-05-28	0.092	305	09:37:00	10:07:00	13:35:00	274	10:10:00	10:40:00	268	10:16:00	10:47:00	14:21:00	268	10:30:00	11:02:00	270	09:15:00	09:47:00	13:45:00	10.06		0.099	14:13:00	13:59:00	01:41:00	02:30:00	15:00:00	35
LPS57	3	lighter tail, wings	2024-05-14	200-224	F	VNS	10:17:00	2024-05-22	55	229	GLL	Pica - died
LPS58	3	darker tail	2024-05-14	200-224	F	LPS	10:43:00	2024-05-22	4	231	SRK	resutured one time	2024-05-29	0.065	217	09:40:00	10:11:00	14:03:00	209	10:45:00	11:17:00	213	10:00:00	10:30:00	14:17:00	217	08:26:00	08:56:00	215	10:46:00	11:15:00	14:55:00	10.06		0.055	15:10:00	15:38:00	01:29:00	02:00:00	15:00:00	40
LPS59	3	narrowing in back, dark middle of tail	2024-05-14	250-274	M	CTRL	11:01:00	2024-05-22	1?	291	SRK		2024-05-30	0.092	306	10:35:00	11:08:00	14:35:00	308	10:49:00	11:21:00	308	08:35:00	09:06:00	13:14:00	304	10:55:00	11:25:00	304	08:55:00	09:25:00	13:02:00	10.024		0.078	13:22:00	13:50:00	01:29:00	01:52:00	15:00:00	33
LPS60	3	solid back, dark tip of tail	2024-05-14	250-274	M	VNS	12:10:00	2024-05-23	51	314	SRK		2024-05-30	0.098	325	10:55:00	11:26:00	14:52:00	299	11:10:00	11:41:00	294	08:55:00	09:27:00	13:25:00	288	11:15:00	11:46:00	294	09:40:00	10:14:00	13:42:00	10.024		0.115	13:49:00	14:35:00	01:45:00	01:58:00	15:00:00	40
LPS61	3	no break in back	2024-05-14	200-224	F	VNS	12:30:00	2024-05-23	66	229	SRK		2024-05-31	0.068	227	10:21:00	10:52:00	14:24:00	212	08:46:00	09:17:00	208	11:05:00	11:37:00	15:20:00	214	09:05:00	09:37:00	215	09:25:00	09:57:00	13:30:00	10.048	did not seize after 1 mL, maybe not in vein?	0.076	13:51:00	14:47:00	01:12:00	01:48:00	15:00:00	38
LPS62	3	break in back	2024-05-14	200-224	F	VNS	09:55:00	2024-05-24	59	215	SRK		2024-05-31	0.063	211	10:40:00	11:14:00	14:44:00	211	09:05:00	09:39:00	213	11:25:00	11:57:00	15:31:00	197	09:15:00	09:45:00	201	10:00:00	10:32:00	14:00:00	10.048		0.052	14:11:00	14:22:00	01:30:00	01:30:00	15:00:00	33

## Sheet: Experiment 2 Animals
Animal Information						Cuff Implant					Post Op Weights									LPS Injection Calculation			Injection Weights					Weight	Perfusion
Animal Name	Cohort	Arrival Date	Arrival Weight	Sex	Group	Cuff Implanted	Device	Weight	Surgeon	Notes	Day 1	Day 2	Day 3	Day 4	Day 5	Day 6	Day 7	Day8	Day 9	LPS Injection Start	LPS amount	Saline Amount	Weight 1	Weight 2	Weight 3	Weight 4	Weight 5	Change	Perfusion Date
LPS82	4	2025-02-11	210-249	M	VNS	2025-03-02	VNS	346	SRK	Day 1: good; Day 2: good; Day 3: good; Day 4: good; Day 5: good	346	338	336	330	340	338	337			2025-03-09	0.1011	0.5729	337	331	319	325	328	18	2025-03-13
LPS83	4	2025-02-11	210-249	M	LPS	2025-03-02	Sham	342	SRK	Day 1: good; Day 2: good; Day 3: good; Day 4: good; Day 5: good	352	347	343	340	325	336	344			2025-03-09	0.1032	0.5848	344	322	318	314	311	33	2025-03-13
LPS84	4	2025-02-11	210-249	M	CTRL	X	X	375				390			403						0	0					408	-33	2025-03-12
LPS85	4	2025-02-11	210-249	M	VNS	2025-03-02	VNS	369	GLL	Day 1: good; Day 2: good; Day 3: good; Day 4: good; Day 5: good	376	375	362	357	360	364	362			2025-03-09	0.1086	0.6154	362	349	340	341	338	24	2025-03-13
LPS86	4	2025-02-11	210-249	M	LPS	2025-03-02	Sham	344	GLL	Day 1: good; Day 2: gurgling; Day 3: gurgling; Day 4: gurgling; Day 5: gurgling, still loosing weight, worse after iso	333	315	290	284	277	283	290	301		2025-03-10	0.0903	0.5117	301	278	274	275	278	27	2025-03-14
LPS87	4	2025-02-11	210-249	M	CTRL	X	X	329				335			337						0	0					347	-18	2025-03-12
LPS88	4	2025-02-11	210-249	M	VNS	2025-03-03	VNS	359	SRK	Day 1: good; Day 2: good; Day 3: good; Day 4: good;	362	355	353	356	355	353	357			2025-03-10	0.1071	0.6069	357	334	322	312	312	45	2025-03-14
LPS89	4	2025-02-11	210-249	M	LPS	2025-03-03	VNS	328	SRK	Day 1: good; Day 2: good; Day 3: lost weight but seems ok - gave saline; Day 4: good;	335	330	315	318	316	316	316			2025-03-10	0.0948	0.5372	316	308	302	305	304	14	2025-03-14
LPS90	4	2025-02-11	210-249	M	CTRL	X	X	299						309							0	0					345	-46	2025-03-19
LPS91	4	2025-02-11	210-249	M	VNS	2025-03-03	VNS	324	GLL	Day 1: good; Day 2: good; Day 3: good; Day 4: good;	325	318	312	312	317	315	314			2025-03-10	0.0942	0.5338	314	302	299	300	299	15	2025-03-14
LPS92	4	2025-02-11	210-249	M	LPS	2025-03-03	VNS	348	GLL	Day 1: gurgling; Day 2: gurgling; Day 3: ?; Day 4: seems okay	334	314	301	297	281	274	276	298		2025-03-11	0.0894	0.5066	298	272	275	278	277	26	2025-03-15
LPS93	4	2025-02-11	210-249	M	CTRL	X	X	327						333							0	0					366	-39	2025-03-19
LPS94	4	2025-02-11	210-249	M	VNS	2025-03-04	VNS	329	SRK	Day 1: good; Day 2: good; Day 3: good;	315	311	317	308	298	305	317			2025-03-11	0.0951	0.5389	317	293	290	290	298	27	2025-03-15
LPS95	4	2025-02-11	210-249	M	LPS	2025-03-04	VNS	354	SRK	Day 1: good; Day 2: good; Day 3: good;	379	365	360	364	360	361	368			2025-03-11	0.1104	0.6256	368	343	331	330	331	38	2025-03-15
LPS96	4	2025-02-11	210-249	M	CTRL	X	X	329					344								0	0					377	-48	2025-03-19
LPS97	4	2025-02-11	210-249	M	VNS	2025-03-04	VNS	345	GLL	Day 1: severe choking; Day 2: some gurgling; Day 3: seems better	318	305	296	310	318	314	319			2025-03-11	0.0957	0.5423	319	295	289	290	292	30	2025-03-15
LPS98	4	2025-02-11	210-249	M	LPS	2025-03-04	VNS	359	GLL	Day 1: choking, became more severe after iso for cefazolin; Day 2: gurgling; Day 3: gurgling - worse after iso	343	322	304	300	302	310	323	328	330	2025-03-13	0.099	0.561	330	304	301	302	312	29	2025-03-17
LPS99	4	2025-02-11	210-249	M	CTRL	X	X	359			350		358								0	0					375	-16	2025-03-17

## Sheet: PTZ Data
			PTZ Dose to reach Seizure Stage (mg/kg)
Animal Name	Sex	Group	Stage 1	Stage 2	Stage 3	Stage 4	Stage 5
LPS46	F	CTRL	19.096	19.1005	19.6979	20.2311	20.3115
LPS49	F	CTRL	20.3295	26.2581	28.7394	29.3723	30.2513
LPS50	F	CTRL	17.3822	18.7846	23.5989	25.3032	NaN
LPS53	F	CTRL	15.6637	17.3627	21.6682	22.161	23.5157
LPS43	M	CTRL	13.8558	15.3516	17.5724	17.9063	18.7903
LPS48	M	CTRL	13.1426	14.6034	17.8487	18.2392	NaN
LPS52	M	CTRL	16.8094	18.8667	19.3211	19.6428	20.2072
LPS59	M	CTRL	17.9448	19.6358	22.3836	22.7909	24.2593
LPS34	F	LPS	12.7304	14.844	16.9303	17.3971	18.498
LPS37	F	LPS	12.3476	14.9104	19.7117	20.4427	25.3313
LPS45	F	LPS	17.5428	17.6796	22.5088	23.1793	24.7559
LPS58	F	LPS	16.0671	20.2261	24.321	24.7694	25.809
LPS44	M	LPS	10.5945	13.0744	15.173	15.573	17.0342
LPS47	M	LPS	12.6282	15.9968	17.9225	18.3076	19.36
LPS51	M	LPS	12.5802	15.6857	17.5253	17.7901	18.5258
LPS55	M	LPS	9.78987	12.8128	15.1086	15.9675	17.2945
LPS42	F	VNS	19.445	20.8054	23.3904	24.7829	25.7146
LPS54	F	VNS	15.9951	21.4867	22.7441	23.671	NaN
LPS62	F	VNS	15.8852	18.8737	19.6569	20.4901	21.6465
LPS35	M	VNS	15.3874	18.1333	20.501	20.8923	21.7024
LPS36	M	VNS	11.4617	12.6791	16.8347	17.0554	17.5729
LPS39	M	VNS	16.9709	17.6914	20.9208	21.4479	22.8568
LPS40	M	VNS	13.2248	15.4452	16.8301	17.5276	18.8532
LPS56	M	VNS	12.8588	14.9875	17.9441	18.539	19.8207
LPS60	M	VNS	11.8424	14.1546	15.5099	16.0219	16.6777

## Sheet: PTZ Statistical Analysis
Summary Stats								Statistical Analysis
FEMALES		Dose to reach Seizure Stage (mg/kg)						Comparison	Stage	Method	Levene_p	Shapiro_p	Interaction_F	Interaction_p	Interaction_eta2p	Group_F	Group_p	Group_q	Group_eta2p	Sex_F	Sex_p	Sex_q	Sex_eta2p
Group	Measure	1	2	3	4	5		CTRL-LPS	1	Two-Way ANOVA	0.254	0.0597	0.0787 (1,12)	0.784	0.007	12.4868 (1,12)	0.00412	0.00824	0.51	7.8980 (1,12)	0.0157	0.0157	0.397
CTRL	mean	18.1178	20.3765	23.4261	24.2669	24.6928		CTRL-LPS	2	Two-Way ANOVA	0.918	0.0647	0.0691 (1,12)	0.797	0.006	4.8289 (1,12)	0.0484	0.0484	0.287	4.2262 (1,12)	0.0622	0.0622	0.26
	std	2.03404	3.99328	3.88375	3.99423	5.07338		CTRL-LPS	3	Two-Way ANOVA	0.512	0.617	0.0104 (1,12)	0.921	0.001	3.5780 (1,12)	0.0829	0.166	0.23	9.0091 (1,12)	0.011	0.011	0.429
LPS	mean	14.672	16.915	20.8679	21.4471	23.5985		CTRL-LPS	4	Two-Way ANOVA	0.267	0.813	0.0009 (1,12)	0.977	0	3.7174 (1,12)	0.0778	0.156	0.237	10.1074 (1,12)	0.00793	0.00793	0.457
	std	2.54038	2.57263	3.23821	3.23779	3.42751		CTRL-LPS	5	Two-Way ANOVA	nan	0.965	0.1770 (1,10)	0.683	0.017	0.8028 (1,10)	0.391	0.672	0.074	3.9496 (1,10)	0.0749	0.0749	0.283
VNS	mean	17.1084	20.3886	21.9305	22.9813	23.6806		LPS-VNS	1	Two-Way ANOVA	0.696	0.0903	0.0102 (1,13)	0.921	0.001	4.9927 (1,13)	0.0436	0.0436	0.277	10.4885 (1,13)	0.00647	0.0129	0.447
	std	2.02426	1.35543	1.99531	2.22794	2.87657		LPS-VNS	2	Two-Way ANOVA	0.556	0.552	1.3360 (1,13)	0.269	0.093	5.1071 (1,13)	0.0416	0.0484	0.282	13.2234 (1,13)	0.00301	0.00603	0.504
								LPS-VNS	3	Two-Way ANOVA	0.477	0.61	0.0659 (1,13)	0.801	0.005	1.3774 (1,13)	0.262	0.262	0.096	12.7490 (1,13)	0.00342	0.00684	0.495
CTRL-LPS	mean	3.44584	3.46149	2.55814	2.81978	1.0943		LPS-VNS	4	Two-Way ANOVA	0.454	0.796	0.0035 (1,13)	0.954	0	1.8990 (1,13)	0.191	0.191	0.127	14.7673 (1,13)	0.00204	0.00407	0.532
VNS-LPS	std	2.43641	3.47363	1.06255	1.53418	0.0820337		LPS-VNS	5	Two-Way ANOVA	nan	0.531	0.1522 (1,12)	0.703	0.013	0.1888 (1,12)	0.672	0.672	0.015	6.7823 (1,12)	0.023	0.0461	0.361
MALES		Dose to reach Seizure Stage (mg/kg)
Group	Measure	1	2	3	4	5
CTRL	mean	15.4382	17.1144	19.2815	19.6448	21.0856
	std	2.30487	2.50605	2.20596	2.22829	2.83832
LPS	mean	11.3982	14.3924	16.4324	16.9096	18.0536
	std	1.43095	1.68118	1.50035	1.34213	1.08706
VNS	mean	13.6243	15.5152	18.0901	18.5807	19.5806
	std	2.14037	2.08654	2.17565	2.17022	2.37823
CTRL-LPS	mean	4.03996	2.72191	2.84911	2.73522	3.03199
VNS-LPS	std	2.22611	1.12274	1.65773	1.67111	1.52698

## Sheet: Cytokines Raw
	Sample ID	Sex	Group	Plate	SampleNum	Well	Eotaxin (CCL11)	G-CSF (CSF-3)	GM-CSF	GRO alpha (CXCL1)	IFN gamma	IL-1 alpha	IL-1 beta	IL-2	IL-4	IL-5	IL-6	IL-10	IL-12p70	IL-13	IL-17A (CTLA-8)	IP-10 (CXCL10)	MCP-1 (CCL2)	MCP-3 (CCL7)	MIP-1 alpha (CCL3)	MIP-2 alpha (CXCL2)	RANTES (CCL5)	TNF alpha
0	LPS34	F	LPS	1	0	1-A3,1-A4	207.14	16.57	OOR<	148.98	57.39	OOR<	355.38	38.75	OOR<	OOR<	OOR<	OOR<	6.17	15.3	4.75	67.32	765.4	186.37	49.93	3.9	25432.8	134.12
1	LPS34	F	LPS	1	1	1-B3,1-B4	253.35	12.66	OOR<	7596.61	854.57	OOR<	722.57	46.26	0.45	OOR<	OOR<	100.58	5.48	18.92	5.83	235.8	4124.76	595.87	355.58	342.72	28092.6	121.66
2	LPS34	F	LPS	1	2	1-C3,1-C4	208.77	9.37	OOR<	419.59	38.32	10.69	7061.34	740.32	0.23	OOR<	OOR<	192.24	OOR<	360.95	3.26	493.17	4298.2	658.17	OOR>	143.31	OOR>	3589.06
3	LPS34	F	LPS	1	3	1-D3,1-D4	265.48	24.74	OOR<	217.42	59.99	38.62	11941.8	1762.33	2.2	OOR<	OOR<	15.99	6.17	1283.44	7.23	570.96	2533.04	591.55	OOR>	359.65	OOR>	OOR>
4	LPS35	M	VNS	1	0	1-E3	192.12	24.74	OOR<	719.86	113.21	OOR<	1002.73	97.4	OOR<	OOR<	OOR<	23.9	18.29	28.17	51.07	80.92	1104.23	232.15	102.67	7.23	29626.2	371.43
5	LPS35	M	VNS	1	1	1-F3,1-F4	118.45	7.7	OOR<	4465.41	106.09	OOR<	716.14	53.63	OOR<	OOR<	2.6	44.29	OOR<	15.3	5.11	223.54	3956.32	353.84	421.43	243.68	26085.3	133.21
6	LPS35	M	VNS	1	2	1-G3,1-G4	103.82	4.13	OOR<	277.34	7	OOR<	1026.04	103.77	OOR<	OOR<	OOR<	69.35	OOR<	30.62	OOR<	222.29	2742.82	343.09	200.12	12.15	23077.7	207.45
7	LPS35	M	VNS	1	3	1-H3,1-H4	160.49	8.12	OOR<	208.85	17.56	OOR<	3250.56	679.51	OOR<	OOR<	OOR<	OOR<	OOR<	298.51	10.92	344.81	2388.69	392.47	641.8	130.5	40591.6	1609.08
8	LPS36	M	VNS	0	0	1-E7,1-E8	409.07	75.16	OOR<	642.45	242.28	OOR<	249.99	9.71	OOR<	OOR<	OOR<	OOR<	5.46	0.57	19.66	73.71	1752.92	384.32	49.75	OOR<	29341.8	93.38
9	LPS36	M	VNS	0	1	1-F7,1-F8	311.8	6.38	OOR<	8133.27	2601.63	OOR<	360.51	22.63	OOR<	OOR<	9.17	OOR<	1.01	OOR<	3.02	216.45	5292.34	682.69	318.32	136.68	26056.9	56.1
10	LPS36	M	VNS	0	2	1-G7,1-G8	150.57	OOR<	OOR<	151.88	16.34	OOR<	1102.06	62.88	OOR<	OOR<	OOR<	4.54	OOR<	17.29	1.22	278.77	2214.93	808.26	132.8	4.46	42232	197.3
11	LPS36	M	VNS	0	3	1-H7,1-H8	258.43	9.04	OOR<	187.53	18.76	OOR<	2198.1	480.58	OOR<	OOR<	OOR<	OOR<	OOR<	210.8	14.08	429.48	3653.83	736.88	534.92	102.72	59333.8	1124.41
12	LPS37	F	LPS	1	0	1-B5,1-B6	89.77	4.07	OOR<	104.78	8.92	OOR<	30.35	13.11	OOR<	OOR<	OOR<	OOR<	OOR<	OOR<	OOR<	99.8	1164.48	351.33	38.75	2.13	9203.4	6.07
13	LPS37	F	LPS	1	1	1-A5,1-A6	184.48	23.29	OOR<	187.76	13.04	130.31	OOR>	OOR>	0.95	2.15	4.98	9.43	11.17	OOR>	11.24	OOR>	1222.8	283.98	OOR>	OOR>	OOR>	OOR>
14	LPS37	F	LPS	1	2	1-C5,1-C6	117.03	17.33	OOR<	161.64	8.59	96.49	OOR>	5857.18	0.67	OOR<	1.15	15.94	6.17	OOR>	6.18	1429.02	2371.57	429.97	OOR>	590.8	OOR>	OOR>
15	LPS37	F	LPS	1	3	1-D5,1-D6	145.8	18.1	OOR<	172.2	13.78	90.26	OOR>	4299.03	1.27	1.73	3.11	91.94	8.22	OOR>	8.94	871.29	1992.54	669.42	OOR>	673.09	OOR>	OOR>
16	LPS38	F	LPS	2	0	1-E11,1-E12	92.13	3.26	OOR<	56.3	3.75	OOR<	OOR<	OOR<	OOR<	OOR<	OOR<	OOR<	OOR<	OOR<	1.24	32.59	644.26	208.66	4.87	OOR<	6840.51	OOR<
17	LPS38	F	LPS	2	1	1-F11,1-F12	89.73	3.26	OOR<	122.42	5.86	OOR<	OOR<	2.35	OOR<	OOR<	OOR<	OOR<	OOR<	OOR<	OOR<	94.75	1015.26	378.11	20.04	1.82	7248.84	OOR<
18	LPS38	F	LPS	2	2	1-G11,1-G12	45.74	10.58	OOR<	92.29	2.29	OOR<	OOR<	OOR<	OOR<	OOR<	OOR<	OOR<	OOR<	OOR<	1.24	57.77	1069.63	279.71	12.51	0.9	4286.27	OOR<
19	LPS39	M	VNS	0	0	1-E5,1-E6	192.97	OOR<	OOR<	149.55	6.37	OOR<	147.57	4.5	OOR<	OOR<	OOR<	OOR<	OOR<	OOR<	5.74	69.21	1958.88	296.25	34.4	OOR<	11664.4	42.99
20	LPS39	M	VNS	0	1	1-F5,1-F6	231.02	6.38	OOR<	380.42	58.45	OOR<	589.85	53.14	OOR<	OOR<	OOR<	48.59	OOR<	18.98	3.54	247.3	3177.99	585.74	357.1	18.49	19709.5	135.49
21	LPS39	M	VNS	0	2	1-G5,1-G6	93.99	OOR<	OOR<	165.71	10.9	OOR<	722.12	70.87	OOR<	OOR<	OOR<	31.75	OOR<	17.44	1.6	175.31	3015.15	492.54	186.23	5.48	15122.7	153.42
22	LPS39	M	VNS	0	3	1-H5,1-H6	100.63	26.05	OOR<	227.97	20.74	11.2	2088.2	449.37	1.88	OOR<	OOR<	12.27	7.38	234.31	8.04	189.73	1916.62	482.05	332.84	127.51	18158.7	1215.61
23	LPS40	M	VNS	1	0	1-E5,1-E6	207.68	4.13	OOR<	187.76	9.23	OOR<	557.42	37.11	OOR<	OOR<	OOR<	OOR<	OOR<	7.69	5.48	85.14	1562.35	216.86	67.42	0.97	25612.7	194.07
24	LPS40	M	VNS	1	1	1-F5,1-F6	264.05	15.03	OOR<	OOR>	4501.46	31.8	4625.27	471.28	1.44	OOR<	7.27	94.18	4.05	157.68	5.83	595.03	3667.87	892.32	OOR>	637.06	57066.3	1486.86
25	LPS40	M	VNS	1	2	1-G5,1-G6	106.51	5.04	OOR<	120.76	13.19	OOR<	3040.91	597.58	OOR<	OOR<	OOR<	94.17	OOR<	182.08	2.49	385.96	2376.87	415.11	791.01	51.05	42658.2	1183.72
26	LPS40	M	VNS	1	3	1-H5,1-H6	172.18	9.39	OOR<	152.3	27.66	670.63	4335.32	823.7	0.34	OOR<	OOR<	20.04	OOR<	444.66	6.01	405.74	1858.83	396.48	665.09	111.47	52531.3	2713.49
27	LPS41	F	LPS	1	0	1-A7,1-A8	250.76	10.18	OOR<	124.68	39.23	OOR<	846.63	156.5	OOR<	OOR<	OOR<	OOR<	OOR<	60.52	3.26	96.36	1396.18	414.18	145.63	20.63	22097.9	353.5
28	LPS41	F	LPS	1	1	1-B7,1-B8	179.23	11.03	OOR<	170.72	29	OOR<	1100.01	201.87	OOR<	OOR<	OOR<	OOR<	OOR<	87.55	3.64	190.75	1832.4	466.26	218.63	37.89	17932.5	426.13
29	LPS41	F	LPS	1	2	1-C7,1-C8	167.92	5.04	OOR<	104.51	21.77	OOR<	969.12	151.28	OOR<	OOR<	OOR<	21.45	OOR<	51.65	OOR<	250.13	3121.02	567.13	163.39	15.43	25312.3	276.41
30	LPS41	F	LPS	1	3	1-D7,1-D8	146.78	24.73	OOR<	158.62	81.8	38.62	10747.3	1998.87	0.84	OOR<	OOR<	50.14	4.41	1231.28	5.3	621.98	2771.58	602.18	OOR>	252.15	OOR>	10649.2
31	LPS42	F	VNS	1	0	1-E7,1-E8	180.32	7.7	OOR<	78.6	11.08	OOR<	84.03	4.99	OOR<	OOR<	OOR<	OOR<	OOR<	OOR<	3.26	50.88	1171.61	312.49	28.89	OOR<	15155.2	30.54
32	LPS42	F	VNS	1	1	1-F7,1-F8	239.63	7.7	OOR<	343.92	12.74	OOR<	1019.57	146.59	OOR<	OOR<	OOR<	OOR<	OOR<	48.79	2.87	201.78	2120.46	574.27	282.46	27.8	30785.2	432.83
33	LPS42	F	VNS	1	2	1-G7,1-G8	169.23	4.07	OOR<	3247.98	2.25	OOR<	707.15	72.6	OOR<	OOR<	OOR<	61.15	OOR<	20.74	OOR<	198.66	3388.19	641.77	150.65	40.7	18854	144.84
34	LPS42	F	VNS	1	3	1-H7,1-H8	307.84	10.22	OOR<	161.38	34	OOR<	4508.95	763.98	OOR<	OOR<	OOR<	OOR<	OOR<	361.71	4.01	359.67	2145.31	515.08	OOR>	145.08	51279.1	3145.72
35	LPS43	M	CTRL	1	0	1-A9,1-A10	114.16	OOR<	OOR<	138.76	2.96	OOR<	103.57	8.85	OOR<	OOR<	OOR<	OOR<	OOR<	OOR<	3.26	53.3	1222.87	169.33	24.74	0.23	14065.9	33.22
36	LPS43	M	CTRL	1	1	1-B9,1-B10	151.14	6.82	OOR<	139.02	16.99	OOR<	2306.54	276.33	OOR<	OOR<	OOR<	OOR<	OOR<	116.49	3.64	112.7	1968.09	243.45	231.29	34.06	27461.6	977.44
37	LPS43	M	CTRL	1	2	1-C9,1-C10	122.31	5.04	OOR<	81.15	21.79	OOR<	912.96	112.92	OOR<	OOR<	OOR<	OOR<	OOR<	42.05	1.69	63.78	1425.61	186.72	113.2	9.96	21061.9	295.88
38	LPS43	M	CTRL	1	3	1-D9,1-D10	77.9	4.13	OOR<	70.05	4.01	OOR<	374.97	46.58	OOR<	OOR<	OOR<	OOR<	OOR<	22.32	OOR<	47.12	951.94	118.52	59.48	4.65	11638.2	121.67
39	LPS44	M	LPS	1	0	1-E9,1-E10	167.17	5.04	OOR<	75.92	9.85	OOR<	205.91	12.41	OOR<	OOR<	OOR<	OOR<	OOR<	2.21	2.09	50.77	1499.11	255.98	53.28	0.38	27722.4	75.49
40	LPS44	M	LPS	1	1	1-F9,1-F10	119.81	8.97	OOR<	1753.39	68.58	OOR<	201.88	16.64	OOR<	OOR<	8.56	OOR<	OOR<	5.2	3.26	121.79	1887.18	441	276.52	158.4	15249.2	80.72
41	LPS44	M	LPS	1	2	1-G9,1-G10	137.62	8.55	OOR<	2587.21	41.67	OOR<	359.3	24.98	OOR<	OOR<	OOR<	OOR<	OOR<	7.01	OOR<	132.98	2197.23	446.68	266.73	45.98	18299.5	85.95
42	LPS44	M	LPS	1	3	1-H9,1-H10	75.54	2.2	OOR<	57.32	2.6	OOR<	429.44	57.67	OOR<	OOR<	OOR<	OOR<	OOR<	24.83	OOR<	48.31	720.98	113.17	62.89	6.19	12179.8	152.71
43	LPS45	F	LPS	0	0	1-A9,1-A10	281.16	24.74	OOR<	116.15	34.62	OOR<	213.41	15.89	OOR<	OOR<	OOR<	OOR<	22.81	5.24	15.02	54.69	1544.1	457.7	60.18	2.19	23921	89.43
44	LPS45	F	LPS	0	1	1-B9,1-B10	102.48	17.3	OOR<	2516.82	548.49	OOR<	219.6	19.47	OOR<	OOR<	OOR<	OOR<	4.81	7.86	7.38	97.42	1810.52	480.99	147.71	129.48	9593.7	47.45
45	LPS45	F	LPS	0	2	1-C9,1-C10	113.51	11.63	OOR<	187.53	5.81	OOR<	1378.83	365.37	OOR<	OOR<	OOR<	OOR<	OOR<	133.15	3.37	271.38	3109.56	693.85	359.66	54.64	28055.2	481.72
46	LPS45	F	LPS	0	3	1-D9,1-D10	92.31	24.72	OOR<	314.12	18.91	22.33	2638.14	703.79	OOR<	OOR<	OOR<	OOR<	8.96	451.87	17.82	226.04	1873.41	446.5	569.2	239.32	23782.1	1367.45
47	LPS46	F	CTRL	1	0	1-A11,1-A12	280.65	19.23	OOR<	130.15	92.96	OOR<	371.05	39.23	OOR<	OOR<	OOR<	OOR<	OOR<	11.1	9.26	48.4	1652.17	342.36	74.13	2.99	27070.8	126.09
48	LPS46	F	CTRL	1	1	1-B11,1-B12	221.04	4.13	OOR<	120.94	11.84	OOR<	620.44	75.04	OOR<	OOR<	OOR<	OOR<	OOR<	22.88	4.02	62.51	1834.25	324.66	91.71	4.04	21029.5	195.31
49	LPS46	F	CTRL	1	2	1-C11,1-C12	232.3	5.95	OOR<	149.09	8.29	OOR<	340.34	49.16	OOR<	OOR<	OOR<	OOR<	OOR<	18.5	4.75	68.22	1333.51	317.94	71.72	5.18	18768	119.3
50	LPS46	F	CTRL	1	3	1-D11,1-D12	112.71	4.13	OOR<	98.02	10.16	OOR<	573.48	70.74	OOR<	OOR<	OOR<	OOR<	OOR<	20.3	5.3	63.75	776.12	142.21	79.81	2.85	14794.4	184.94
51	LPS47	M	LPS	0	0	1-E9,1-E10	192.45	26.6	OOR<	187.96	73.62	OOR<	1109.29	105.04	OOR<	OOR<	OOR<	OOR<	2.87	33.06	5.73	110.74	2430.22	189.91	129.32	7.13	50312.9	473.01
52	LPS47	M	LPS	0	1	1-F9,1-F10	77.91	17.31	OOR<	5579.24	110.81	OOR<	507.77	67.35	OOR<	OOR<	OOR<	OOR<	4.16	25.51	5.4	168.23	2893.17	278.43	305.82	156.11	17425.7	160.11
53	LPS47	M	LPS	0	2	1-G9,1-G10	71.25	4.04	OOR<	250.2	3.81	OOR<	726.98	117.28	OOR<	OOR<	OOR<	OOR<	OOR<	32.3	1.22	167.07	2501.01	230.36	170.4	11.45	19021.9	221.31
54	LPS47	M	LPS	0	3	1-H9,1-H10	423.43	28	OOR<	344.89	63.85	13.99	4605.87	792.82	OOR<	OOR<	OOR<	17.48	1.59	375.68	7.71	413.45	3426.92	354.38	OOR>	126.03	59932	3014.3
55	LPS48	M	CTRL	1	0	1-E11,1-E12	247.91	2.2	OOR<	75.92	5.03	OOR<	15.61	OOR<	OOR<	OOR<	OOR<	OOR<	OOR<	OOR<	OOR<	21.72	1391.26	275.02	11.19	OOR<	16505.5	4.58
56	LPS48	M	CTRL	1	1	1-F11,1-F12	214.53	3.16	OOR<	64.18	0.44	OOR<	44.54	OOR<	OOR<	OOR<	OOR<	OOR<	OOR<	OOR<	OOR<	39.67	1309.15	353.41	15.05	OOR<	9923.91	13.98
57	LPS48	M	CTRL	1	2	1-G11,1-G12	155.93	2.2	OOR<	64.18	0.8	OOR<	81.25	1.25	OOR<	OOR<	OOR<	OOR<	OOR<	OOR<	OOR<	34.14	1163.39	265.48	18.86	OOR<	9697.39	37.65
58	LPS48	M	CTRL	1	3	1-H11,1-H12	66.59	OOR<	OOR<	57.32	0.8	OOR<	OOR<	OOR<	OOR<	OOR<	OOR<	OOR<	OOR<	OOR<	OOR<	23.46	666.51	214.1	1.09	OOR<	3775.83	OOR<
59	LPS49	F	CTRL	2	0	1-A3,1-A4	281.41	32.44	OOR<	132.59	72.87	OOR<	883.95	103.29	0.51	OOR<	OOR<	OOR<	11.64	43.52	3.57	87.08	1862.49	426.75	115.08	10.17	17241	359.59
60	LPS49	F	CTRL	2	1	1-B3,1-B4	214.33	14.39	OOR<	109.31	31.82	OOR<	935.61	175.62	0.27	OOR<	OOR<	OOR<	OOR<	78.8	2.81	104.82	1406.96	351.47	143.46	24.42	15086.5	407.75
61	LPS49	F	CTRL	2	2	1-C3,1-C4	105.03	8.59	OOR<	69.65	13.43	OOR<	527.92	144.16	OOR<	OOR<	OOR<	OOR<	OOR<	66.23	1.64	108.04	748.74	291.86	116.83	22.37	9861.78	185.7
62	LPS49	F	CTRL	2	3	1-D3,1-D4	111.33	13.45	OOR<	92.29	13.65	OOR<	360.55	62.8	0.14	OOR<	OOR<	OOR<	3.82	30.37	2.62	63.07	1160.9	298.21	70.62	10.36	11101	154.02
63	LPS50	F	CTRL	2	0	1-E3,1-E4	284.18	25.68	OOR<	974.76	112.45	OOR<	287.52	34.31	0.3	OOR<	OOR<	20.14	15.69	12.1	50.66	69.99	1763.91	258.06	58.92	3	21699.3	118.61
64	LPS50	F	CTRL	2	1	1-F3	341.35	26.5	OOR<	387.9	152.06	OOR<	959.8	163.39	1.22	OOR<	OOR<	22.76	7.98	57.65	12.04	124.94	2325.98	305.24	175.33	21.39	31830.7	429.61
65	LPS50	F	CTRL	2	2	1-G3,1-G4	204.56	18.9	OOR<	232.29	36.05	OOR<	455.27	78.23	0.57	OOR<	OOR<	OOR<	10.21	37.82	8.67	87.49	1689.05	292.76	91.51	13.83	17387.3	212.48
66	LPS50	F	CTRL	2	3	1-H3,1-H4	198.92	14.82	OOR<	406.95	46.95	OOR<	429.14	66.64	0.51	OOR<	OOR<	OOR<	14.37	28.96	22.58	95.58	1703.18	300.65	95.3	8.57	18941.3	184.85
67	LPS51	M	LPS	2	0	1-A5,1-A6	121.66	7.55	OOR<	69.65	6.86	OOR<	OOR<	OOR<	OOR<	OOR<	OOR<	OOR<	OOR<	OOR<	2.03	30.68	1637.06	147.84	7.81	OOR<	9246.03	OOR<
68	LPS51	M	LPS	2	1	1-B5,1-B6	96.68	12.51	OOR<	2354.32	63.24	OOR<	87.68	OOR<	0.14	OOR<	OOR<	OOR<	OOR<	OOR<	2.81	86.85	2320.58	307.98	131.3	81.69	9059.33	10.73
69	LPS51	M	LPS	2	2	1-C5,1-C6	101.58	6.52	OOR<	722.15	23.95	OOR<	405.06	59.44	0.17	OOR<	OOR<	OOR<	OOR<	19.47	0.85	183.18	3311.37	394.29	294.31	10.53	18633	118.11
70	LPS51	M	LPS	2	3	1-D5,1-D6	76.86	14.37	OOR<	102.24	12.52	OOR<	1000.59	231.06	0.81	OOR<	OOR<	OOR<	OOR<	105.97	3.2	141.6	1893	261.57	186.82	49.06	15301.4	545.48
71	LPS52	M	CTRL	0	0	1-E3,1-E4	175.31	208.41	OOR<	227.97	213	OOR<	215.66	17.6	29.09	2.85	OOR<	422.19	192.48	4.18	7.38	60.61	2778.09	333.27	48.32	0.63	18201.1	87.86
72	LPS52	M	CTRL	0	1	1-F3,1-F4	120.08	15.88	OOR<	249.72	5.53	OOR<	822.51	166.72	OOR<	OOR<	OOR<	OOR<	3.27	82.79	5.4	112.1	1317.92	373.45	146.32	39.38	13600.4	349.37
73	LPS52	M	CTRL	0	2	1-G3,1-G4	173.73	7.89	OOR<	120.63	7.46	OOR<	709.35	123.3	OOR<	OOR<	OOR<	OOR<	OOR<	45.2	3.02	132.3	1676.52	358.23	133.23	11.66	21312.9	271.47
74	LPS52	M	CTRL	0	3	1-H3,1-H4	53.91	OOR<	OOR<	65.74	3.21	OOR<	303.51	93.27	OOR<	OOR<	OOR<	OOR<	OOR<	30.61	1.22	101.78	890.4	129.99	88.67	7.14	11468.9	84.71
75	LPS53	F	CTRL	0	0	1-A3,1-A4	403.74	29.94	OOR<	753.29	213	OOR<	485.05	104.06	OOR<	OOR<	OOR<	OOR<	24.47	40.66	35.34	138.25	2885.06	401.76	110.32	15.62	42387.2	180.68
76	LPS53	F	CTRL	0	1	1-B3,1-B4	195.72	13.06	OOR<	249.72	41.14	OOR<	657.4	98.32	OOR<	OOR<	OOR<	OOR<	OOR<	41.7	5.73	84.78	3252.98	318.8	110.17	14.31	27020.9	227.14
77	LPS53	F	CTRL	0	2	1-C3,1-C4	187.43	8.67	OOR<	152.05	34.97	OOR<	355.96	44.35	OOR<	OOR<	OOR<	OOR<	OOR<	13.55	4.73	75	2637.05	248.31	75.81	1.6	27440.9	112.64
78	LPS53	F	CTRL	0	3	1-D3,1-D4	156.35	17.3	OOR<	183.58	21.69	OOR<	371.79	51.55	OOR<	OOR<	OOR<	OOR<	1.65	21.27	6.72	70.77	2112.04	224.26	73.33	6.12	21606.7	145.68
79	LPS54	F	VNS	0	0	1-A7,1-A8	176.33	6.38	OOR<	212.53	10.9	OOR<	512.9	42.18	OOR<	OOR<	OOR<	OOR<	OOR<	13.69	10.92	76.1	2535.41	173.06	80.27	1.61	27036.2	183.16
80	LPS54	F	VNS	0	1	1-B7,1-B8	224.17	10.89	OOR<	7234.14	1858.94	OOR<	457.23	15.6	OOR<	OOR<	3.74	61.49	OOR<	1.49	6.07	161.23	3818.89	598.65	258.9	172.12	22971.2	65.28
81	LPS54	F	VNS	0	2	1-C7,1-C8	111.58	7.91	OOR<	329.87	7.05	OOR<	1158.66	223.57	OOR<	OOR<	OOR<	11.99	OOR<	69.3	5.4	231.54	3518.38	478.76	419.17	27.9	29677.4	361.64
82	LPS54	F	VNS	0	3	1-D7,1-D8	165.09	14.5	OOR<	730.29	26.7	OOR<	1475.63	328.84	OOR<	OOR<	OOR<	OOR<	2.23	136.19	68.76	241.67	3164.92	570.05	559.18	58.68	25613	681
83	LPS55	M	LPS	2	0	1-E5,1-E6	84.55	11.07	OOR<	69.65	15.67	OOR<	71.19	2.35	OOR<	OOR<	OOR<	OOR<	OOR<	OOR<	6.47	55.26	1122.99	181.05	20.05	OOR<	10854.1	31.14
84	LPS55	M	LPS	2	1	1-F5,1-F6	120.36	14.37	OOR<	3260.33	870.17	OOR<	261.69	15.79	0.69	OOR<	18.32	67.68	OOR<	OOR<	2.81	126.63	2476.28	383.83	196.21	112.56	14107	45.57
85	LPS55	M	LPS	2	2	1-G5,1-G6	51.33	10.58	OOR<	75.88	68.05	OOR<	1590	238.97	OOR<	OOR<	OOR<	OOR<	OOR<	58.55	1.24	236.45	2722.23	322.15	242.56	12.67	35886.1	737.58
86	LPS55	M	LPS	2	3	1-H5,1-H6	335.07	16.23	OOR<	444.63	401.99	16.63	4708.75	610.05	1.22	OOR<	OOR<	296.73	OOR<	181.95	8.18	437.66	4240.38	599.49	OOR>	73.68	OOR>	2537.69
87	LPS56	M	VNS	2	0	1-A7,1-A8	92.53	7.55	OOR<	167.92	3.17	OOR<	157.51	21.37	OOR<	OOR<	OOR<	OOR<	OOR<	10	2.43	45.54	1079.18	153.68	41.34	2.59	9796.7	73.95
88	LPS56	M	VNS	2	1	1-B7,1-B8	123.1	15.31	OOR<	3378.09	391.13	10.94	892.74	146.78	0.39	OOR<	12.27	21.73	OOR<	55.52	4.69	181.39	3373.52	381.75	320.66	157.68	15935.9	328.11
89	LPS56	M	VNS	2	2	1-C7,1-C8	150.51	12.51	OOR<	360.48	18.41	OOR<	2776.89	561.99	0.45	OOR<	OOR<	40.57	OOR<	154.39	4.32	303.43	3102.81	442.3	563.59	45.41	37695.9	1593.14
90	LPS56	M	VNS	2	3	1-D7,1-D8	89.72	17.01	OOR<	359.72	7.35	16.63	1544.16	330.68	0.45	OOR<	OOR<	OOR<	5.56	161.93	7.15	173.58	1962.03	379.08	391.45	79.89	18358.6	908.21
91	LPS57	F	VNS	2	0	1-H11,1-H12	281.7	18.46	OOR<	81.51	25.88	OOR<	1718.14	251.48	OOR<	OOR<	OOR<	OOR<	OOR<	70.83	3.2	96.12	1368.13	233.83	206.77	17.15	32463.2	830
92	LPS58	F	LPS	2	0	1-E7,1-E8	267.46	7.55	OOR<	231.01	92.16	OOR<	197.03	22.27	0.39	OOR<	OOR<	12.41	OOR<	5.22	7.51	53.44	2004.2	262.59	44.87	1.04	18267.3	68.07
93	LPS58	F	LPS	2	1	1-F7,1-F8	438.81	19.78	OOR<	OOR>	480.37	61.61	21764.4	1013.24	1.16	0.72	14.57	171.47	9.85	393.24	16.22	622.01	5141.48	895.85	OOR>	OOR>	OOR>	OOR>
94	LPS58	F	LPS	2	2	1-G7,1-G8	139.68	12.48	OOR<	408.44	22.66	16.63	4363.66	458.13	0.45	OOR<	OOR<	120.4	OOR<	149.5	3.2	290.35	3250.12	409.23	761.29	52.73	48523.5	2165.28
95	LPS58	F	LPS	2	3	1-H7,1-H8	192.68	24	OOR<	177.89	70.77	22.32	5790.21	932.79	0.75	OOR<	OOR<	50.68	OOR<	330.29	6.82	381.75	2375.44	475.77	OOR>	85.85	53012	4909.62
96	LPS59	M	CTRL	2	0	1-A9,1-A10	142.68	10.08	OOR<	92.29	4.55	OOR<	OOR<	OOR<	OOR<	OOR<	OOR<	OOR<	OOR<	OOR<	2.03	17.75	1204.69	223.99	1.19	OOR<	8791.17	OOR<
97	LPS59	M	CTRL	2	1	1-B9,1-B10	102.44	6.48	OOR<	87.13	2.13	OOR<	18.22	OOR<	OOR<	OOR<	OOR<	OOR<	OOR<	OOR<	1.64	24.01	1141.93	233.99	11.47	OOR<	7356.54	8.45
98	LPS59	M	CTRL	2	2	1-C9,1-C10	184.02	7.55	OOR<	147.7	2.89	OOR<	105.15	6.07	OOR<	OOR<	OOR<	OOR<	OOR<	OOR<	4.32	41.37	1560.59	309.91	32.96	OOR<	14895.8	32.17
99	LPS59	M	CTRL	2	3	1-D9,1-D10	152.66	5.45	OOR<	116.02	1.64	OOR<	40.53	OOR<	OOR<	OOR<	OOR<	OOR<	OOR<	OOR<	2.81	31.2	1328.89	291.07	15.1	OOR<	13072.7	15.75
100	LPS60	M	VNS	2	0	1-E9,1-E10	143.43	7.55	OOR<	147.56	9.51	OOR<	24.6	OOR<	OOR<	OOR<	OOR<	OOR<	OOR<	OOR<	2.03	30.96	1372.27	144.29	11.94	OOR<	11867.3	11.31
101	LPS60	M	VNS	2	1	1-F9,1-F10	99.91	15.31	OOR<	2538.56	126.61	OOR<	95.32	OOR<	0.14	OOR<	0.83	OOR<	OOR<	OOR<	2.43	106.36	2105.53	346.53	152.32	100.57	10346.7	18.45
102	LPS60	M	VNS	2	2	1-G9,1-G10	118.67	8.59	OOR<	188.6	53.64	OOR<	585.39	55.21	1.05	OOR<	OOR<	44.69	OOR<	15.27	2.62	177.72	3404.27	406.99	249.54	6.28	23513.8	139.15
103	LPS60	M	VNS	2	3	1-H9,1-H10	174.4	13.45	OOR<	158.01	87.35	OOR<	1897.5	327.69	2.13	OOR<	OOR<	83.47	OOR<	127.04	2.03	223.45	1791.84	396.18	516.49	65.16	28598.3	1058.43
104	LPS61	F	VNS	2	0	1-A11,1-A12	212.36	7.55	OOR<	101.57	10.9	OOR<	776.13	84.06	OOR<	OOR<	OOR<	OOR<	OOR<	24.91	2.03	80.39	1815.94	224.1	112.44	5.13	38949.9	340.43
105	LPS61	F	VNS	2	1	1-B11,1-B12	145.82	12.48	OOR<	4088.72	996.51	8.1	431.23	23.69	0.33	OOR<	8.34	33.72	3.82	5.31	3.19	149.75	2090.75	376.89	216.52	171.01	18421.4	67.56
106	LPS61	F	VNS	2	2	1-C11,1-C12	122.23	17.95	OOR<	164.92	12.29	27.99	6015.61	1028.64	0.21	OOR<	OOR<	32.13	OOR<	200.35	3.94	403.97	3156.96	415.08	OOR>	52.99	OOR>	4911.34
107	LPS61	F	VNS	2	3	1-D11,1-D12	210.57	40.35	OOR<	216.76	28.44	39.28	14012.3	2383.58	0.69	1.81	OOR<	24.35	19.47	OOR>	6.82	590.99	1686.8	457	OOR>	438.94	OOR>	OOR>
108	LPS62	F	VNS	0	0	1-A5,1-A6	439.21	4.79	OOR<	161.29	12.95	OOR<	264.08	25.11	OOR<	OOR<	OOR<	OOR<	OOR<	4.56	4.73	74.92	1925.63	311.59	61.59	0.41	27608.7	87.88
109	LPS62	F	VNS	0	1	1-B5,1-B6	324.51	10.89	OOR<	320.65	28.47	OOR<	438.53	62.05	OOR<	OOR<	OOR<	OOR<	OOR<	18.15	7.05	164.41	3196.98	520.79	160.9	8.22	24015.2	146.7
110	LPS62	F	VNS	0	2	1-C5,1-C6	340.21	20.06	OOR<	8952.71	968.31	OOR<	544.23	34.5	OOR<	OOR<	OOR<	140.78	2.88	5.68	11.88	194.78	4532.11	662.14	314.49	173.71	27118.2	76.83
111	LPS62	F	VNS	0	3	1-D5,1-D6	132.31	14.5	OOR<	291.62	21.1	OOR<	1187.45	424.17	OOR<	OOR<	OOR<	7.09	OOR<	137.78	29.97	220.45	3143.87	524.69	366.33	62.26	22137.1	391.49

## Sheet: Cytokines
	SampleID	Sex	Group	Cohort	Plate	SampleNum	Well	Eotaxin	G-CSF	GRO alpha	IFN gamma	IL-1 alpha	IL-1 beta	IL-2	IL-4	IL-6	IL-10	IL-12p70	IL-13	IL-17A	IP-10	MCP-1	MCP-3	MIP-1 alpha	MIP-2 alpha	RANTES	TNF alpha
0	LPS34	F	LPS	0	1	0	1-A3,1-A4	207.14	16.57	148.98	57.39	5	355.38	38.75	0.09	0.95	4.4	6.17	15.3	4.75	67.32	765.4	186.37	49.93	3.9	25432.8	134.12
1	LPS34	F	LPS	0	1	1	1-B3,1-B4	253.35	12.66	7596.61	854.57	7.85	722.57	46.26	0.45	0.95	100.58	5.48	18.92	5.83	235.8	4124.76	595.87	355.58	342.72	28092.6	121.66
2	LPS34	F	LPS	0	1	2	1-C3,1-C4	208.77	9.37	419.59	38.32	10.69	7061.34	740.32	0.23	0.95	192.24	1.48	360.95	3.26	493.17	4298.2	658.17	2341.83	143.31	70151.1	3589.06
3	LPS34	F	LPS	0	1	3	1-D3,1-D4	265.48	24.74	217.42	59.99	38.62	11941.8	1762.33	2.2	0.95	15.99	6.17	1283.44	7.23	570.96	2533.04	591.55	2881.16	359.65	87482.5	18160.2
4	LPS35	M	VNS	0	1	0	1-E3	192.12	24.74	719.86	113.21	5	1002.73	97.4	0.09	0.95	23.9	18.29	28.17	51.07	80.92	1104.23	232.15	102.67	7.23	29626.2	371.43
5	LPS35	M	VNS	0	1	1	1-F3,1-F4	118.45	7.7	4465.41	106.09	5	716.14	53.63	0.09	2.6	44.29	1.48	15.3	5.11	223.54	3956.32	353.84	421.43	243.68	26085.3	133.21
6	LPS35	M	VNS	0	1	2	1-G3,1-G4	103.82	4.13	277.34	7	5	1026.04	103.77	0.09	0.95	69.35	1.48	30.62	0.63	222.29	2742.82	343.09	200.12	12.15	23077.7	207.45
7	LPS35	M	VNS	0	1	3	1-H3,1-H4	160.49	8.12	208.85	17.56	5	3250.56	679.51	0.09	0.95	4.81	1.48	298.51	10.92	344.81	2388.69	392.47	641.8	130.5	40591.6	1609.08
8	LPS36	M	VNS	0	0	0	1-E7,1-E8	409.07	75.16	642.45	242.28	5	249.99	9.71	0.09	0.95	4.4	5.46	1.33	19.66	73.71	1752.92	384.32	49.75	0.26	29341.8	93.38
9	LPS36	M	VNS	0	0	1	1-F7,1-F8	311.8	6.38	8133.27	2601.63	5	360.51	22.63	0.09	9.17	4.4	1.48	1.33	3.02	216.45	5292.34	682.69	318.32	136.68	26056.9	56.1
10	LPS36	M	VNS	0	0	2	1-G7,1-G8	150.57	1.58	151.88	16.34	5	1102.06	62.88	0.09	0.95	4.54	1.48	17.29	1.22	278.77	2214.93	808.26	132.8	4.46	42232	197.3
11	LPS36	M	VNS	0	0	3	1-H7,1-H8	258.43	9.04	187.53	18.76	5	2198.1	480.58	0.09	0.95	4.4	1.48	210.8	14.08	429.48	3653.83	736.88	534.92	102.72	59333.8	1124.41
12	LPS37	F	LPS	0	1	0	1-B5,1-B6	89.77	4.07	104.78	8.92	5	30.35	13.11	0.09	0.95	4.4	1.48	1.58	0.63	99.8	1164.48	351.33	38.75	2.13	9203.4	6.07
13	LPS37	F	LPS	0	1	1	1-A5,1-A6	184.48	23.29	187.76	13.04	130.31	73225	10440.4	0.95	4.98	9.43	11.17	4815.03	11.24	3001.82	1222.8	283.98	2881.16	913.64	103076	21870.7
14	LPS37	F	LPS	0	1	2	1-C5,1-C6	117.03	17.33	161.64	8.59	96.49	73225	5857.18	0.67	1.15	15.94	6.17	4815.03	6.18	1429.02	2371.57	429.97	2881.16	590.8	103076	21870.7
15	LPS37	F	LPS	0	1	3	1-D5,1-D6	145.8	18.1	172.2	13.78	90.26	62168.9	4299.03	1.27	3.11	91.94	8.22	4815.03	8.94	871.29	1992.54	669.42	2881.16	673.09	103076	21870.7
16	LPS38	F	LPS	0	2	0	1-E11,1-E12	92.13	3.26	56.3	3.75	5	8.46	1.35	0.09	0.95	4.4	1.48	1.33	1.24	32.59	644.26	208.66	4.87	0.26	6840.51	3.26
17	LPS38	F	LPS	0	2	1	1-F11,1-F12	89.73	3.26	122.42	5.86	5	8.46	2.35	0.09	0.95	4.4	1.48	1.33	0.74	94.75	1015.26	378.11	20.04	1.82	7248.84	3.26
18	LPS38	F	LPS	0	2	2	1-G11,1-G12	45.74	10.58	92.29	2.29	5	8.46	1.35	0.09	0.95	4.4	1.48	1.33	1.24	57.77	1069.63	279.71	12.51	0.9	4286.27	3.75
19	LPS39	M	VNS	0	0	0	1-E5,1-E6	192.97	1.58	149.55	6.37	5	147.57	4.5	0.09	0.95	4.4	1.48	1.33	5.74	69.21	1958.88	296.25	34.4	0.26	11664.4	42.99
20	LPS39	M	VNS	0	0	1	1-F5,1-F6	231.02	6.38	380.42	58.45	5	589.85	53.14	0.09	0.95	48.59	1.48	18.98	3.54	247.3	3177.99	585.74	357.1	18.49	19709.5	135.49
21	LPS39	M	VNS	0	0	2	1-G5,1-G6	93.99	1.58	165.71	10.9	5	722.12	70.87	0.09	0.95	31.75	1.48	17.44	1.6	175.31	3015.15	492.54	186.23	5.48	15122.7	153.42
22	LPS39	M	VNS	0	0	3	1-H5,1-H6	100.63	26.05	227.97	20.74	11.2	2088.2	449.37	1.88	0.95	12.27	7.38	234.31	8.04	189.73	1916.62	482.05	332.84	127.51	18158.7	1215.61
23	LPS40	M	VNS	0	1	0	1-E5,1-E6	207.68	4.13	187.76	9.23	5	557.42	37.11	0.09	0.95	4.4	1.48	7.69	5.48	85.14	1562.35	216.86	67.42	0.97	25612.7	194.07
24	LPS40	M	VNS	0	1	1	1-F5,1-F6	264.05	15.03	10292.1	4501.46	31.8	4625.27	471.28	1.44	7.27	94.18	4.05	157.68	5.83	595.03	3667.87	892.32	2804.38	637.06	57066.3	1486.86
25	LPS40	M	VNS	0	1	2	1-G5,1-G6	106.51	5.04	120.76	13.19	5	3040.91	597.58	0.09	0.95	94.17	1.48	182.08	2.49	385.96	2376.87	415.11	791.01	51.05	42658.2	1183.72
26	LPS40	M	VNS	0	1	3	1-H5,1-H6	172.18	9.39	152.3	27.66	670.63	4335.32	823.7	0.34	0.95	20.04	1.48	444.66	6.01	405.74	1858.83	396.48	665.09	111.47	52531.3	2713.49
27	LPS41	F	LPS	0	1	0	1-A7,1-A8	250.76	10.18	124.68	39.23	5	846.63	156.5	0.09	0.95	4.4	2.03	60.52	3.26	96.36	1396.18	414.18	145.63	20.63	22097.9	353.5
28	LPS41	F	LPS	0	1	1	1-B7,1-B8	179.23	11.03	170.72	29	5	1100.01	201.87	0.09	0.95	4.4	2.03	87.55	3.64	190.75	1832.4	466.26	218.63	37.89	17932.5	426.13
29	LPS41	F	LPS	0	1	2	1-C7,1-C8	167.92	5.04	104.51	21.77	5	969.12	151.28	0.09	0.95	21.45	1.48	51.65	1.16	250.13	3121.02	567.13	163.39	15.43	25312.3	276.41
30	LPS41	F	LPS	0	1	3	1-D7,1-D8	146.78	24.73	158.62	81.8	38.62	10747.3	1998.87	0.84	0.95	50.14	4.41	1231.28	5.3	621.98	2771.58	602.18	2881.16	252.15	78359.3	10649.2
31	LPS42	F	VNS	0	1	0	1-E7,1-E8	180.32	7.7	78.6	11.08	5	84.03	4.99	0.09	0.95	4.4	1.48	1.33	3.26	50.88	1171.61	312.49	28.89	0.26	15155.2	30.54
32	LPS42	F	VNS	0	1	1	1-F7,1-F8	239.63	7.7	343.92	12.74	5	1019.57	146.59	0.09	0.95	4.4	1.48	48.79	2.87	201.78	2120.46	574.27	282.46	27.8	30785.2	432.83
33	LPS42	F	VNS	0	1	2	1-G7,1-G8	169.23	4.07	3247.98	2.25	5	707.15	72.6	0.09	0.95	61.15	1.48	20.74	1.16	198.66	3388.19	641.77	150.65	40.7	18854	144.84
34	LPS42	F	VNS	0	1	3	1-H7,1-H8	307.84	10.22	161.38	34	15	4508.95	763.98	0.19	0.95	4.4	1.48	361.71	4.01	359.67	2145.31	515.08	2267.58	145.08	51279.1	3145.72
35	LPS43	M	CTRL	1	1	0	1-A9,1-A10	114.16	1.58	138.76	2.96	5	103.57	8.85	0.09	0.95	4.4	1.48	1.33	3.26	53.3	1222.87	169.33	24.74	0.26	14065.9	33.22
36	LPS43	M	CTRL	1	1	1	1-B9,1-B10	151.14	6.82	139.02	16.99	5	2306.54	276.33	0.09	0.95	4.4	1.48	116.49	3.64	112.7	1968.09	243.45	231.29	34.06	27461.6	977.44
37	LPS43	M	CTRL	1	1	2	1-C9,1-C10	122.31	5.04	81.15	21.79	5	912.96	112.92	0.09	0.95	4.4	1.48	42.05	1.69	63.78	1425.61	186.72	113.2	9.96	21061.9	295.88
38	LPS43	M	CTRL	1	1	3	1-D9,1-D10	77.9	4.13	70.05	4.01	5	374.97	46.58	0.09	0.95	4.4	1.48	22.32	1.16	47.12	951.94	118.52	59.48	4.65	11638.2	121.67
39	LPS44	M	LPS	1	1	0	1-E9,1-E10	167.17	5.04	75.92	9.85	5	205.91	12.41	0.09	0.95	4.4	1.48	2.21	2.09	50.77	1499.11	255.98	53.28	0.38	27722.4	75.49
40	LPS44	M	LPS	1	1	1	1-F9,1-F10	119.81	8.97	1753.39	68.58	5	201.88	16.64	0.09	8.56	4.4	1.48	5.2	3.26	121.79	1887.18	441	276.52	158.4	15249.2	80.72
41	LPS44	M	LPS	1	1	2	1-G9,1-G10	137.62	8.55	2587.21	41.67	5	359.3	24.98	0.09	0.95	4.4	1.48	7.01	1.16	132.98	2197.23	446.68	266.73	45.98	18299.5	85.95
42	LPS44	M	LPS	1	1	3	1-H9,1-H10	75.54	2.2	57.32	2.6	5	429.44	57.67	0.09	0.95	4.4	1.48	24.83	0.63	48.31	720.98	113.17	62.89	6.19	12179.8	152.71
43	LPS45	F	LPS	1	0	0	1-A9,1-A10	281.16	24.74	116.15	34.62	5	213.41	15.89	0.09	0.95	4.4	22.81	5.24	15.02	54.69	1544.1	457.7	60.18	2.19	23921	89.43
44	LPS45	F	LPS	1	0	1	1-B9,1-B10	102.48	17.3	2516.82	548.49	5	219.6	19.47	0.09	0.95	4.4	4.81	7.86	7.38	97.42	1810.52	480.99	147.71	129.48	9593.7	47.45
45	LPS45	F	LPS	1	0	2	1-C9,1-C10	113.51	11.63	187.53	5.81	5	1378.83	365.37	0.09	0.95	4.4	1.48	133.15	3.37	271.38	3109.56	693.85	359.66	54.64	28055.2	481.72
46	LPS45	F	LPS	1	0	3	1-D9,1-D10	92.31	24.72	314.12	18.91	22.33	2638.14	703.79	0.09	0.95	4.4	8.96	451.87	17.82	226.04	1873.41	446.5	569.2	239.32	23782.1	1367.45
47	LPS46	F	CTRL	1	1	0	1-A11,1-A12	280.65	19.23	130.15	92.96	5	371.05	39.23	0.09	0.95	4.4	1.48	11.1	9.26	48.4	1652.17	342.36	74.13	2.99	27070.8	126.09
48	LPS46	F	CTRL	1	1	1	1-B11,1-B12	221.04	4.13	120.94	11.84	5	620.44	75.04	0.09	0.95	4.4	1.48	22.88	4.02	62.51	1834.25	324.66	91.71	4.04	21029.5	195.31
49	LPS46	F	CTRL	1	1	2	1-C11,1-C12	232.3	5.95	149.09	8.29	5	340.34	49.16	0.09	0.95	4.4	1.48	18.5	4.75	68.22	1333.51	317.94	71.72	5.18	18768	119.3
50	LPS46	F	CTRL	1	1	3	1-D11,1-D12	112.71	4.13	98.02	10.16	5	573.48	70.74	0.09	0.95	4.4	1.48	20.3	5.3	63.75	776.12	142.21	79.81	2.85	14794.4	184.94
51	LPS47	M	LPS	1	0	0	1-E9,1-E10	192.45	26.6	187.96	73.62	5	1109.29	105.04	0.09	0.95	4.4	2.87	33.06	5.73	110.74	2430.22	189.91	129.32	7.13	50312.9	473.01
52	LPS47	M	LPS	1	0	1	1-F9,1-F10	77.91	17.31	5579.24	110.81	5	507.77	67.35	0.09	0.95	4.4	4.16	25.51	5.4	168.23	2893.17	278.43	305.82	156.11	17425.7	160.11
53	LPS47	M	LPS	1	0	2	1-G9,1-G10	71.25	4.04	250.2	3.81	5	726.98	117.28	0.09	0.95	4.4	1.48	32.3	1.22	167.07	2501.01	230.36	170.4	11.45	19021.9	221.31
54	LPS47	M	LPS	1	0	3	1-H9,1-H10	423.43	28	344.89	63.85	13.99	4605.87	792.82	0.09	0.95	17.48	1.59	375.68	7.71	413.45	3426.92	354.38	2168.95	126.03	59932	3014.3
55	LPS48	M	CTRL	1	1	0	1-E11,1-E12	247.91	2.2	75.92	5.03	5	15.61	1.35	0.09	0.95	4.4	1.48	1.33	1.16	21.72	1391.26	275.02	11.19	0.26	16505.5	4.58
56	LPS48	M	CTRL	1	1	1	1-F11,1-F12	214.53	3.16	64.18	0.44	5	44.54	1.35	0.09	0.95	4.4	1.48	1.33	0.63	39.67	1309.15	353.41	15.05	0.26	9923.91	13.98
57	LPS48	M	CTRL	1	1	2	1-G11,1-G12	155.93	2.2	64.18	0.8	5	81.25	1.35	0.09	0.95	4.4	1.48	1.33	1.16	34.14	1163.39	265.48	18.86	0.26	9697.39	37.65
58	LPS48	M	CTRL	1	1	3	1-H11,1-H12	66.59	1.89	57.32	0.8	5	8.46	1.35	0.09	0.95	4.4	1.48	1.33	0.63	23.46	666.51	214.1	1.09	0.26	3775.83	3.26
59	LPS49	F	CTRL	1	2	0	1-A3,1-A4	281.41	32.44	132.59	72.87	5	883.95	103.29	0.51	0.95	4.4	11.64	43.52	3.57	87.08	1862.49	426.75	115.08	10.17	17241	359.59
60	LPS49	F	CTRL	1	2	1	1-B3,1-B4	214.33	14.39	109.31	31.82	5	935.61	175.62	0.27	0.95	4.4	2.2	78.8	2.81	104.82	1406.96	351.47	143.46	24.42	15086.5	407.75
61	LPS49	F	CTRL	1	2	2	1-C3,1-C4	105.03	8.59	69.65	13.43	5	527.92	144.16	0.09	0.95	4.4	1.48	66.23	1.64	108.04	748.74	291.86	116.83	22.37	9861.78	185.7
62	LPS49	F	CTRL	1	2	3	1-D3,1-D4	111.33	13.45	92.29	13.65	5	360.55	62.8	0.14	0.95	4.4	3.82	30.37	2.62	63.07	1160.9	298.21	70.62	10.36	11101	154.02
63	LPS50	F	CTRL	1	2	0	1-E3,1-E4	284.18	25.68	974.76	112.45	5	287.52	34.31	0.3	0.95	20.14	15.69	12.1	50.66	69.99	1763.91	258.06	58.92	3	21699.3	118.61
64	LPS50	F	CTRL	1	2	1	1-F3	341.35	26.5	387.9	152.06	5	959.8	163.39	1.22	0.95	22.76	7.98	57.65	12.04	124.94	2325.98	305.24	175.33	21.39	31830.7	429.61
65	LPS50	F	CTRL	1	2	2	1-G3,1-G4	204.56	18.9	232.29	36.05	5	455.27	78.23	0.57	0.95	4.4	10.21	37.82	8.67	87.49	1689.05	292.76	91.51	13.83	17387.3	212.48
66	LPS50	F	CTRL	1	2	3	1-H3,1-H4	198.92	14.82	406.95	46.95	5	429.14	66.64	0.51	0.95	4.4	14.37	28.96	22.58	95.58	1703.18	300.65	95.3	8.57	18941.3	184.85
67	LPS51	M	LPS	1	2	0	1-A5,1-A6	121.66	7.55	69.65	6.86	5	9.86	1.35	0.09	0.95	4.4	1.48	1.33	2.03	30.68	1637.06	147.84	7.81	0.26	9246.03	3.75
68	LPS51	M	LPS	1	2	1	1-B5,1-B6	96.68	12.51	2354.32	63.24	5	87.68	1.35	0.14	0.95	4.4	1.48	1.33	2.81	86.85	2320.58	307.98	131.3	81.69	9059.33	10.73
69	LPS51	M	LPS	1	2	2	1-C5,1-C6	101.58	6.52	722.15	23.95	5	405.06	59.44	0.17	0.95	4.4	1.48	19.47	0.85	183.18	3311.37	394.29	294.31	10.53	18633	118.11
70	LPS51	M	LPS	1	2	3	1-D5,1-D6	76.86	14.37	102.24	12.52	7.85	1000.59	231.06	0.81	0.95	4.4	2.2	105.97	3.2	141.6	1893	261.57	186.82	49.06	15301.4	545.48
71	LPS52	M	CTRL	1	0	0	1-E3,1-E4	175.31	208.41	227.97	213	5	215.66	17.6	29.09	0.95	422.19	192.48	4.18	7.38	60.61	2778.09	333.27	48.32	0.63	18201.1	87.86
72	LPS52	M	CTRL	1	0	1	1-F3,1-F4	120.08	15.88	249.72	5.53	5	822.51	166.72	0.09	0.95	4.4	3.27	82.79	5.4	112.1	1317.92	373.45	146.32	39.38	13600.4	349.37
73	LPS52	M	CTRL	1	0	2	1-G3,1-G4	173.73	7.89	120.63	7.46	5	709.35	123.3	0.09	0.95	4.4	1.48	45.2	3.02	132.3	1676.52	358.23	133.23	11.66	21312.9	271.47
74	LPS52	M	CTRL	1	0	3	1-H3,1-H4	53.91	1.58	65.74	3.21	5	303.51	93.27	0.09	0.95	4.4	1.48	30.61	1.22	101.78	890.4	129.99	88.67	7.14	11468.9	84.71
75	LPS53	F	CTRL	2	0	0	1-A3,1-A4	403.74	29.94	753.29	213	5	485.05	104.06	0.09	0.95	4.4	24.47	40.66	35.34	138.25	2885.06	401.76	110.32	15.62	42387.2	180.68
76	LPS53	F	CTRL	2	0	1	1-B3,1-B4	195.72	13.06	249.72	41.14	5	657.4	98.32	0.09	0.95	4.4	2.18	41.7	5.73	84.78	3252.98	318.8	110.17	14.31	27020.9	227.14
77	LPS53	F	CTRL	2	0	2	1-C3,1-C4	187.43	8.67	152.05	34.97	5	355.96	44.35	0.09	0.95	4.4	1.48	13.55	4.73	75	2637.05	248.31	75.81	1.6	27440.9	112.64
78	LPS53	F	CTRL	2	0	3	1-D3,1-D4	156.35	17.3	183.58	21.69	5	371.79	51.55	0.09	0.95	4.4	1.65	21.27	6.72	70.77	2112.04	224.26	73.33	6.12	21606.7	145.68
79	LPS54	F	VNS	2	0	0	1-A7,1-A8	176.33	6.38	212.53	10.9	5	512.9	42.18	0.09	0.95	4.4	1.48	13.69	10.92	76.1	2535.41	173.06	80.27	1.61	27036.2	183.16
80	LPS54	F	VNS	2	0	1	1-B7,1-B8	224.17	10.89	7234.14	1858.94	5	457.23	15.6	0.09	3.74	61.49	1.48	1.49	6.07	161.23	3818.89	598.65	258.9	172.12	22971.2	65.28
81	LPS54	F	VNS	2	0	2	1-C7,1-C8	111.58	7.91	329.87	7.05	5	1158.66	223.57	0.09	0.95	11.99	1.48	69.3	5.4	231.54	3518.38	478.76	419.17	27.9	29677.4	361.64
82	LPS54	F	VNS	2	0	3	1-D7,1-D8	165.09	14.5	730.29	26.7	5	1475.63	328.84	0.09	0.95	4.4	2.23	136.19	68.76	241.67	3164.92	570.05	559.18	58.68	25613	681
83	LPS55	M	LPS	2	2	0	1-E5,1-E6	84.55	11.07	69.65	15.67	5	71.19	2.35	0.09	0.95	4.4	2.2	1.33	6.47	55.26	1122.99	181.05	20.05	0.26	10854.1	31.14
84	LPS55	M	LPS	2	2	1	1-F5,1-F6	120.36	14.37	3260.33	870.17	5	261.69	15.79	0.69	18.32	67.68	2.2	1.33	2.81	126.63	2476.28	383.83	196.21	112.56	14107	45.57
85	LPS55	M	LPS	2	2	2	1-G5,1-G6	51.33	10.58	75.88	68.05	5	1590	238.97	0.09	0.95	4.4	1.48	58.55	1.24	236.45	2722.23	322.15	242.56	12.67	35886.1	737.58
86	LPS55	M	LPS	2	2	3	1-H5,1-H6	335.07	16.23	444.63	401.99	16.63	4708.75	610.05	1.22	0.95	296.73	2.2	181.95	8.18	437.66	4240.38	599.49	2738.8	73.68	67381.4	2537.69
87	LPS56	M	VNS	2	2	0	1-A7,1-A8	92.53	7.55	167.92	3.17	5	157.51	21.37	0.09	0.95	4.4	1.48	10	2.43	45.54	1079.18	153.68	41.34	2.59	9796.7	73.95
88	LPS56	M	VNS	2	2	1	1-B7,1-B8	123.1	15.31	3378.09	391.13	10.94	892.74	146.78	0.39	12.27	21.73	3.11	55.52	4.69	181.39	3373.52	381.75	320.66	157.68	15935.9	328.11
89	LPS56	M	VNS	2	2	2	1-C7,1-C8	150.51	12.51	360.48	18.41	7.85	2776.89	561.99	0.45	0.95	40.57	3.11	154.39	4.32	303.43	3102.81	442.3	563.59	45.41	37695.9	1593.14
90	LPS56	M	VNS	2	2	3	1-D7,1-D8	89.72	17.01	359.72	7.35	16.63	1544.16	330.68	0.45	0.95	4.4	5.56	161.93	7.15	173.58	1962.03	379.08	391.45	79.89	18358.6	908.21
91	LPS57	F	VNS	2	2	0	1-H11,1-H12	281.7	18.46	81.51	25.88	5	1718.14	251.48	0.09	0.95	4.4	1.48	70.83	3.2	96.12	1368.13	233.83	206.77	17.15	32463.2	830
92	LPS58	F	LPS	2	2	0	1-E7,1-E8	267.46	7.55	231.01	92.16	5	197.03	22.27	0.39	0.95	12.41	1.48	5.22	7.51	53.44	2004.2	262.59	44.87	1.04	18267.3	68.07
93	LPS58	F	LPS	2	2	1	1-F7,1-F8	438.81	19.78	12692	480.37	61.61	21764.4	1013.24	1.16	14.57	171.47	9.85	393.24	16.22	622.01	5141.48	895.85	2952.11	844.17	103544	20415.8
94	LPS58	F	LPS	2	2	2	1-G7,1-G8	139.68	12.48	408.44	22.66	16.63	4363.66	458.13	0.45	0.95	120.4	1.48	149.5	3.2	290.35	3250.12	409.23	761.29	52.73	48523.5	2165.28
95	LPS58	F	LPS	2	2	3	1-H7,1-H8	192.68	24	177.89	70.77	22.32	5790.21	932.79	0.75	0.95	50.68	1.48	330.29	6.82	381.75	2375.44	475.77	2299.5	85.85	53012	4909.62
96	LPS59	M	CTRL	2	2	0	1-A9,1-A10	142.68	10.08	92.29	4.55	5	8.46	1.35	0.09	0.95	4.4	1.48	1.33	2.03	17.75	1204.69	223.99	1.19	0.26	8791.17	3.26
97	LPS59	M	CTRL	2	2	1	1-B9,1-B10	102.44	6.48	87.13	2.13	5	18.22	1.35	0.09	0.95	4.4	1.48	1.33	1.64	24.01	1141.93	233.99	11.47	0.26	7356.54	8.45
98	LPS59	M	CTRL	2	2	2	1-C9,1-C10	184.02	7.55	147.7	2.89	5	105.15	6.07	0.09	0.95	4.4	1.48	1.33	4.32	41.37	1560.59	309.91	32.96	0.26	14895.8	32.17
99	LPS59	M	CTRL	2	2	3	1-D9,1-D10	152.66	5.45	116.02	1.64	5	40.53	1.35	0.09	0.95	4.4	1.48	1.33	2.81	31.2	1328.89	291.07	15.1	0.26	13072.7	15.75
100	LPS60	M	VNS	2	2	0	1-E9,1-E10	143.43	7.55	147.56	9.51	5	24.6	1.35	0.09	0.95	4.4	1.48	1.33	2.03	30.96	1372.27	144.29	11.94	0.26	11867.3	11.31
101	LPS60	M	VNS	2	2	1	1-F9,1-F10	99.91	15.31	2538.56	126.61	5	95.32	1.35	0.14	0.95	4.4	1.48	1.33	2.43	106.36	2105.53	346.53	152.32	100.57	10346.7	18.45
102	LPS60	M	VNS	2	2	2	1-G9,1-G10	118.67	8.59	188.6	53.64	5	585.39	55.21	1.05	0.95	44.69	1.48	15.27	2.62	177.72	3404.27	406.99	249.54	6.28	23513.8	139.15
103	LPS60	M	VNS	2	2	3	1-H9,1-H10	174.4	13.45	158.01	87.35	22.32	1897.5	327.69	2.13	0.95	83.47	1.48	127.04	2.03	223.45	1791.84	396.18	516.49	65.16	28598.3	1058.43
104	LPS61	F	VNS	2	2	0	1-A11,1-A12	212.36	7.55	101.57	10.9	5	776.13	84.06	0.09	0.95	4.4	1.48	24.91	2.03	80.39	1815.94	224.1	112.44	5.13	38949.9	340.43
105	LPS61	F	VNS	2	2	1	1-B11,1-B12	145.82	12.48	4088.72	996.51	8.1	431.23	23.69	0.33	8.34	33.72	3.82	5.31	3.19	149.75	2090.75	376.89	216.52	171.01	18421.4	67.56
106	LPS61	F	VNS	2	2	2	1-C11,1-C12	122.23	17.95	164.92	12.29	27.99	6015.61	1028.64	0.21	0.95	32.13	2.2	200.35	3.94	403.97	3156.96	415.08	2429.04	52.99	72699.9	4911.34
107	LPS61	F	VNS	2	2	3	1-D11,1-D12	210.57	40.35	216.76	28.44	39.28	14012.3	2383.58	0.69	0.95	24.35	19.47	3134.6	6.82	590.99	1686.8	457	2952.11	438.94	74285.5	22162
108	LPS62	F	VNS	2	0	0	1-A5,1-A6	439.21	4.79	161.29	12.95	5	264.08	25.11	0.09	0.95	4.4	1.48	4.56	4.73	74.92	1925.63	311.59	61.59	0.41	27608.7	87.88
109	LPS62	F	VNS	2	0	1	1-B5,1-B6	324.51	10.89	320.65	28.47	5	438.53	62.05	0.09	0.95	4.4	1.48	18.15	7.05	164.41	3196.98	520.79	160.9	8.22	24015.2	146.7
110	LPS62	F	VNS	2	0	2	1-C5,1-C6	340.21	20.06	8952.71	968.31	5	544.23	34.5	0.09	0.95	140.78	2.88	5.68	11.88	194.78	4532.11	662.14	314.49	173.71	27118.2	76.83
111	LPS62	F	VNS	2	0	3	1-D5,1-D6	132.31	14.5	291.62	21.1	5	1187.45	424.17	0.09	0.95	7.09	1.54	137.78	29.97	220.45	3143.87	524.69	366.33	62.26	22137.1	391.49

## Sheet: Cytokines Summary and log2 FC
Summary Stats (pg/mL)										Log2 Fold Chage
Cytokine	SampleNum	Group	Sex	Median	Q1	Q3	N	IQR		Cytokine	SampleNum	Sex	Comparison	Log2FC
Eotaxin	1	CTRL	F	217.685	209.678	251.118	4	41.44		Eotaxin	1	F	CTRL-LPS	-0.259453
Eotaxin	1	CTRL	M	135.61	115.67	166.988	4	51.3175		Eotaxin	1	F	LPS-VNS	0.350714
Eotaxin	1	LPS	F	181.855	121.668	236.132	6	114.465		Eotaxin	1	M	CTRL-LPS	-0.325163
Eotaxin	1	LPS	M	108.245	91.9875	119.948	4	27.96		Eotaxin	1	M	LPS-VNS	0.709938
Eotaxin	1	VNS	F	231.9	204.583	260.85	4	56.2675		Eotaxin	2	F	CTRL-LPS	-0.488691
Eotaxin	1	VNS	M	177.06	119.612	255.792	6	136.18		Eotaxin	2	F	LPS-VNS	0.0611724
Eotaxin	2	CTRL	F	195.995	166.83	211.495	4	44.665		Eotaxin	2	M	CTRL-LPS	-0.931625
Eotaxin	2	CTRL	M	164.83	147.525	176.303	4	28.7775		Eotaxin	2	M	LPS-VNS	0.381725
Eotaxin	2	LPS	F	139.68	117.03	167.92	5	50.89		Eotaxin	3	F	CTRL-LPS	0.125727
Eotaxin	2	LPS	M	86.415	66.27	110.59	4	44.32		Eotaxin	3	F	LPS-VNS	0.355772
Eotaxin	2	VNS	F	145.73	119.567	211.975	4	92.4075		Eotaxin	3	M	CTRL-LPS	1.4027
Eotaxin	2	VNS	M	112.59	104.493	142.55	6	38.0575		Eotaxin	3	M	LPS-VNS	-0.308307
Eotaxin	3	CTRL	F	134.53	112.365	166.993	4	54.6275		G-CSF	1	F	CTRL-LPS	0.126231
Eotaxin	3	CTRL	M	77.9	65.905	115.28	3	49.375		G-CSF	1	F	LPS-VNS	-0.460034
Eotaxin	3	LPS	F	146.78	145.8	192.68	5	46.88		G-CSF	1	M	CTRL-LPS	1.01511
Eotaxin	3	LPS	M	205.965	76.53	357.16	4	280.63		G-CSF	1	M	LPS-VNS	-0.241935
Eotaxin	3	VNS	F	187.83	156.895	234.887	4	77.9925		G-CSF	2	F	CTRL-LPS	0.430419
Eotaxin	3	VNS	M	166.335	115.595	173.845	6	58.25		G-CSF	2	F	LPS-VNS	0.152871
G-CSF	1	CTRL	F	13.725	10.8275	17.4175	4	6.59		G-CSF	2	M	CTRL-LPS	0.259401
G-CSF	1	CTRL	M	6.65	5.65	9.085	4	3.435		G-CSF	2	M	LPS-VNS	-0.716686
G-CSF	1	LPS	F	14.98	11.4375	19.16	6	7.7225		G-CSF	3	F	CTRL-LPS	0.806407
G-CSF	1	LPS	M	13.44	11.625	15.105	4	3.48		G-CSF	3	F	LPS-VNS	-0.769626
G-CSF	1	VNS	F	10.89	10.0925	11.2875	4	1.195		G-CSF	3	M	CTRL-LPS	1.88932
G-CSF	1	VNS	M	11.365	6.71	15.24	6	8.53		G-CSF	3	M	LPS-VNS	-0.421969
G-CSF	2	CTRL	F	8.63	7.93	11.2275	4	3.2975		GRO alpha	1	F	CTRL-LPS	2.86724
G-CSF	2	CTRL	M	6.295	4.33	7.635	4	3.305		GRO alpha	1	F	LPS-VNS	0.712762
G-CSF	2	LPS	F	11.63	9.37	12.48	5	3.11		GRO alpha	1	M	CTRL-LPS	4.63384
G-CSF	2	LPS	M	7.535	5.9	9.0575	4	3.1575		GRO alpha	1	M	LPS-VNS	0.482301
G-CSF	2	VNS	F	12.93	6.95	18.4775	4	11.5275		GRO alpha	2	F	CTRL-LPS	0.316687
G-CSF	2	VNS	M	4.585	2.2175	7.7025	6	5.485		GRO alpha	2	F	LPS-VNS	3.2539
G-CSF	3	CTRL	F	14.135	11.12	15.44	4	4.32		GRO alpha	2	M	CTRL-LPS	2.26869
G-CSF	3	CTRL	M	4.13	2.855	4.79	3	1.935		GRO alpha	2	M	LPS-VNS	-1.45646
G-CSF	3	LPS	F	24.72	24	24.73	5	0.73		GRO alpha	3	F	CTRL-LPS	0.337338
G-CSF	3	LPS	M	15.3	11.3275	19.1725	4	7.845		GRO alpha	3	F	LPS-VNS	0.514922
G-CSF	3	VNS	F	14.5	13.43	20.9625	4	7.5325		GRO alpha	3	M	CTRL-LPS	1.67424
G-CSF	3	VNS	M	11.42	9.1275	16.12	6	6.9925		GRO alpha	3	M	LPS-VNS	-0.17381
GRO alpha	1	CTRL	F	185.33	118.032	284.265	4	166.232		IFN gamma	1	F	CTRL-LPS	2.80354
GRO alpha	1	CTRL	M	113.075	81.3925	166.695	4	85.3025		IFN gamma	1	F	LPS-VNS	1.00881
GRO alpha	1	LPS	F	1352.29	174.98	6326.66	6	6151.68		IFN gamma	1	M	CTRL-LPS	4.54961
GRO alpha	1	LPS	M	2807.32	2204.09	3840.06	4	1635.97		IFN gamma	1	M	LPS-VNS	1.52913
GRO alpha	1	VNS	F	2216.32	338.103	4875.07	4	4536.97		IFN gamma	2	F	CTRL-LPS	-0.152666
GRO alpha	1	VNS	M	3921.75	2748.44	7216.31	6	4467.86		IFN gamma	2	F	LPS-VNS	-1.17075
GRO alpha	2	CTRL	F	150.57	129.23	172.11	4	42.88		IFN gamma	2	M	CTRL-LPS	2.6645
GRO alpha	2	CTRL	M	100.89	76.9075	127.397	4	50.49		IFN gamma	2	M	LPS-VNS	-1.15195
GRO alpha	2	LPS	F	187.53	161.64	408.44	5	246.8		IFN gamma	3	F	CTRL-LPS	1.76342
GRO alpha	2	LPS	M	486.175	206.62	1188.41	4	981.795		IFN gamma	3	F	LPS-VNS	-1.12162
GRO alpha	2	VNS	F	1788.92	288.632	4674.16	4	4385.53		IFN gamma	3	M	CTRL-LPS	3.57236
GRO alpha	2	VNS	M	177.155	155.338	255.155	6	99.8175		IFN gamma	3	M	LPS-VNS	-0.951153
GRO alpha	3	CTRL	F	140.8	96.5875	239.423	4	142.835		IL-1 alpha	1	F	CTRL-LPS	0.361768
GRO alpha	3	CTRL	M	70.05	67.895	93.035	3	25.14		IL-1 alpha	1	F	LPS-VNS	-0.361768
GRO alpha	3	LPS	F	177.89	172.2	217.42	5	45.22		IL-1 alpha	1	M	CTRL-LPS	0
GRO alpha	3	LPS	M	223.565	91.01	369.825	4	278.815		IL-1 alpha	1	M	LPS-VNS	0
GRO alpha	3	VNS	F	254.19	202.915	401.288	4	198.373		IL-1 alpha	2	F	CTRL-LPS	1.09626
GRO alpha	3	VNS	M	198.19	165.39	223.19	6	57.8		IL-1 alpha	2	F	LPS-VNS	-1.09626
IFN gamma	1	CTRL	F	36.48	26.825	68.87	4	42.045		IL-1 alpha	2	M	CTRL-LPS	0
IFN gamma	1	CTRL	M	3.83	1.7075	8.395	4	6.6875		IL-1 alpha	2	M	LPS-VNS	0
IFN gamma	1	LPS	F	254.685	17.03	531.46	6	514.43		IL-1 alpha	3	F	CTRL-LPS	2.94935
IFN gamma	1	LPS	M	89.695	67.245	300.65	4	233.405		IL-1 alpha	3	F	LPS-VNS	-1.94935
IFN gamma	1	VNS	F	512.49	24.5375	1212.12	4	1187.58		IL-1 alpha	3	M	CTRL-LPS	1.12697
IFN gamma	1	VNS	M	258.87	111.22	2049.01	6	1937.79		IL-1 alpha	3	M	LPS-VNS	0.349668
IFN gamma	2	CTRL	F	24.2	12.145	35.24	4	23.095		IL-1 beta	1	F	CTRL-LPS	0.194227
IFN gamma	2	CTRL	M	5.175	2.3675	11.0425	4	8.675		IL-1 beta	1	F	LPS-VNS	-1.0248
IFN gamma	2	LPS	F	21.77	8.59	22.66	5	14.07		IL-1 beta	1	M	CTRL-LPS	-0.903328
IFN gamma	2	LPS	M	32.81	18.915	48.265	4	29.35		IL-1 beta	1	M	LPS-VNS	1.49428
IFN gamma	2	VNS	F	9.67	5.85	251.295	4	245.445		IL-1 beta	2	F	CTRL-LPS	3.42736
IFN gamma	2	VNS	M	14.765	11.4725	17.8925	6	6.42		IL-1 beta	2	F	LPS-VNS	-2.22574
IFN gamma	3	CTRL	F	17.67	12.7775	28.005	4	15.2275		IL-1 beta	2	M	CTRL-LPS	0.474938
IFN gamma	3	CTRL	M	3.21	2.425	3.61	3	1.185		IL-1 beta	2	M	LPS-VNS	0.910641
IFN gamma	3	LPS	F	59.99	18.91	70.77	5	51.86		IL-1 beta	3	F	CTRL-LPS	4.74615
IFN gamma	3	LPS	M	38.185	10.04	148.385	4	138.345		IL-1 beta	3	F	LPS-VNS	-1.84465
IFN gamma	3	VNS	F	27.57	25.3	29.83	4	4.53		IL-1 beta	3	M	CTRL-LPS	3.20727
IFN gamma	3	VNS	M	19.75	17.86	25.93	6	8.07		IL-1 beta	3	M	LPS-VNS	-0.387357
IL-1 alpha	1	CTRL	F	5	5	5	4	0		IL-10	1	F	CTRL-LPS	0.652226
IL-1 alpha	1	CTRL	M	5	5	5	4	0		IL-10	1	F	LPS-VNS	1.46275
IL-1 alpha	1	LPS	F	6.425	5	48.17	6	43.17		IL-10	1	M	CTRL-LPS	0
IL-1 alpha	1	LPS	M	5	5	5	4	0		IL-10	1	M	LPS-VNS	2.90733
IL-1 alpha	1	VNS	F	5	5	5.775	4	0.775		IL-10	2	F	CTRL-LPS	2.2854
IL-1 alpha	1	VNS	M	5	5	9.455	6	4.455		IL-10	2	F	LPS-VNS	1.12059
IL-1 alpha	2	CTRL	F	5	5	5	4	0		IL-10	2	M	CTRL-LPS	0
IL-1 alpha	2	CTRL	M	5	5	5	4	0		IL-10	2	M	LPS-VNS	3.27629
IL-1 alpha	2	LPS	F	10.69	5	16.63	5	11.63		IL-10	3	F	CTRL-LPS	3.51039
IL-1 alpha	2	LPS	M	5	5	5	4	0		IL-10	3	F	LPS-VNS	-3.12558
IL-1 alpha	2	VNS	F	5	5	10.7475	4	5.7475		IL-10	3	M	CTRL-LPS	1.31404
IL-1 alpha	2	VNS	M	5	5	5	6	0		IL-10	3	M	LPS-VNS	-0.357305
IL-1 alpha	3	CTRL	F	5	5	5	4	0		IL-12p70	1	F	CTRL-LPS	1.23224
IL-1 alpha	3	CTRL	M	5	5	5	3	0		IL-12p70	1	F	LPS-VNS	-1.79757
IL-1 alpha	3	LPS	F	38.62	22.33	38.62	5	16.29		IL-12p70	1	M	CTRL-LPS	0.314109
IL-1 alpha	3	LPS	M	10.92	7.1375	14.65	4	7.5125		IL-12p70	1	M	LPS-VNS	-0.314109
IL-1 alpha	3	VNS	F	10	5	21.07	4	16.07		IL-12p70	2	F	CTRL-LPS	0
IL-1 alpha	3	VNS	M	13.915	6.55	20.8975	6	14.3475		IL-12p70	2	F	LPS-VNS	0.314109
IL-1 beta	1	CTRL	F	796.505	648.16	941.658	4	293.498		IL-12p70	2	M	CTRL-LPS	0
IL-1 beta	1	CTRL	M	433.525	37.96	1193.52	4	1155.56		IL-12p70	2	M	LPS-VNS	0
IL-1 beta	1	LPS	F	911.29	345.342	16598.3	6	16252.9		IL-12p70	3	F	CTRL-LPS	1.17373
IL-1 beta	1	LPS	M	231.785	173.33	323.21	4	149.88		IL-12p70	3	F	LPS-VNS	-1.71071
IL-1 beta	1	VNS	F	447.88	436.705	597.815	4	161.11		IL-12p70	3	M	CTRL-LPS	0.356601
IL-1 beta	1	VNS	M	652.995	417.845	848.59	6	430.745		IL-12p70	3	M	LPS-VNS	-0.356601
IL-1 beta	2	CTRL	F	405.615	352.055	473.433	4	121.378		IL-13	1	F	CTRL-LPS	0.0998551
IL-1 beta	2	CTRL	M	407.25	99.175	760.253	4	661.078		IL-13	1	F	LPS-VNS	-2.18217
IL-1 beta	2	LPS	F	4363.66	1378.83	7061.34	5	5682.51		IL-13	1	M	CTRL-LPS	-3.68729
IL-1 beta	2	LPS	M	566.02	393.62	942.735	4	549.115		IL-13	1	M	LPS-VNS	2.39221
IL-1 beta	2	VNS	F	932.905	666.42	2372.9	4	1706.48		IL-13	2	F	CTRL-LPS	2.40843
IL-1 beta	2	VNS	M	1064.05	798.1	2358.18	6	1560.08		IL-13	2	F	LPS-VNS	-1.73151
IL-1 beta	3	CTRL	F	400.465	368.98	465.225	4	96.245		IL-13	2	M	CTRL-LPS	0.255086
IL-1 beta	3	CTRL	M	303.51	172.02	339.24	3	167.22		IL-13	2	M	LPS-VNS	-0.10728
IL-1 beta	3	LPS	F	10747.3	5790.21	11941.8	5	6151.62		IL-13	3	F	CTRL-LPS	5.61547
IL-1 beta	3	LPS	M	2803.23	857.803	4631.59	4	3773.79		IL-13	3	F	LPS-VNS	-2.30163
IL-1 beta	3	VNS	F	2992.29	1403.59	6884.78	4	5481.19		IL-13	3	M	CTRL-LPS	2.68926
IL-1 beta	3	VNS	M	2143.15	1945.17	2987.45	6	1042.27		IL-13	3	M	LPS-VNS	0.628494
IL-10	1	CTRL	F	4.4	4.4	8.99	4	4.59		IL-17A	1	F	CTRL-LPS	0.438156
IL-10	1	CTRL	M	4.4	4.4	4.4	4	0		IL-17A	1	F	LPS-VNS	-0.512546
IL-10	1	LPS	F	6.915	4.4	77.7925	6	73.3925		IL-17A	1	M	CTRL-LPS	0.201159
IL-10	1	LPS	M	4.4	4.4	20.22	4	15.82		IL-17A	1	M	LPS-VNS	0.439196
IL-10	1	VNS	F	19.06	4.4	40.6625	4	36.2625		IL-17A	2	F	CTRL-LPS	-0.540015
IL-10	1	VNS	M	33.01	8.7325	47.515	6	38.7825		IL-17A	2	F	LPS-VNS	0.518551
IL-10	2	CTRL	F	4.4	4.4	4.4	4	0		IL-17A	2	M	CTRL-LPS	-0.984765
IL-10	2	CTRL	M	4.4	4.4	4.4	4	0		IL-17A	2	M	LPS-VNS	0.781139
IL-10	2	LPS	F	21.45	15.94	120.4	5	104.46		IL-17A	3	F	CTRL-LPS	0.266631
IL-10	2	LPS	M	4.4	4.4	4.4	4	0		IL-17A	3	F	LPS-VNS	1.34725
IL-10	2	VNS	F	46.64	27.095	81.0575	4	53.9625		IL-17A	3	M	CTRL-LPS	2.1607
IL-10	2	VNS	M	42.63	33.955	63.185	6	29.23		IL-17A	3	M	LPS-VNS	0.477471
IL-10	3	CTRL	F	4.4	4.4	4.4	4	0		IL-2	1	F	CTRL-LPS	-0.0768729
IL-10	3	CTRL	M	4.4	4.4	4.4	3	0		IL-2	1	F	LPS-VNS	-1.53306
IL-10	3	LPS	F	50.14	15.99	50.68	5	34.69		IL-2	1	M	CTRL-LPS	-2.37366
IL-10	3	LPS	M	10.94	4.4	87.2925	4	82.8925		IL-2	1	M	LPS-VNS	1.71911
IL-10	3	VNS	F	5.745	4.4	11.405	4	7.005		IL-2	2	F	CTRL-LPS	2.84651
IL-10	3	VNS	M	8.54	4.5025	18.0975	6	13.595		IL-2	2	F	LPS-VNS	-1.62933
IL-12p70	1	CTRL	F	2.19	2.005	3.645	4	1.64		IL-2	2	M	CTRL-LPS	0.570625
IL-12p70	1	CTRL	M	1.48	1.48	1.9275	4	0.4475		IL-2	2	M	LPS-VNS	-0.0170813
IL-12p70	1	LPS	F	5.145	2.725	8.7575	6	6.0325		IL-2	3	F	CTRL-LPS	4.76713
IL-12p70	1	LPS	M	1.84	1.48	2.69	4	1.21		IL-2	3	F	LPS-VNS	-1.56877
IL-12p70	1	VNS	F	1.48	1.48	2.065	4	0.585		IL-2	3	M	CTRL-LPS	3.17451
IL-12p70	1	VNS	M	1.48	1.48	2.7025	6	1.2225		IL-2	3	M	LPS-VNS	0.144859
IL-12p70	2	CTRL	F	1.48	1.48	3.6625	4	2.1825		IL-4	1	F	CTRL-LPS	0.584963
IL-12p70	2	CTRL	M	1.48	1.48	1.48	4	0		IL-4	1	F	LPS-VNS	-1.58496
IL-12p70	2	LPS	F	1.48	1.48	1.48	5	0		IL-4	1	M	CTRL-LPS	0.353637
IL-12p70	2	LPS	M	1.48	1.48	1.48	4	0		IL-4	1	M	LPS-VNS	0
IL-12p70	2	VNS	F	1.84	1.48	2.37	4	0.89		IL-4	2	F	CTRL-LPS	1.35364
IL-12p70	2	VNS	M	1.48	1.48	1.48	6	0		IL-4	2	F	LPS-VNS	-1.35364
IL-12p70	3	CTRL	F	2.735	1.6075	6.4575	4	4.85		IL-4	2	M	CTRL-LPS	0
IL-12p70	3	CTRL	M	1.48	1.48	1.48	3	0		IL-4	2	M	LPS-VNS	0
IL-12p70	3	LPS	F	6.17	4.41	8.22	5	3.81		IL-4	3	F	CTRL-LPS	2.86876
IL-12p70	3	LPS	M	1.895	1.5625	2.2	4	0.6375		IL-4	3	F	LPS-VNS	-2.58496
IL-12p70	3	VNS	F	1.885	1.525	6.54	4	5.015		IL-4	3	M	CTRL-LPS	2.32193
IL-12p70	3	VNS	M	1.48	1.48	4.54	6	3.06		IL-4	3	M	LPS-VNS	-0.188072
IL-13	1	CTRL	F	49.675	36.995	62.9375	4	25.9425		IL-6	1	F	CTRL-LPS	0
IL-13	1	CTRL	M	42.06	1.33	91.215	4	89.885		IL-6	1	F	LPS-VNS	1.30359
IL-13	1	LPS	F	53.235	10.625	316.817	6	306.192		IL-6	1	M	CTRL-LPS	2.32345
IL-13	1	LPS	M	3.265	1.33	10.2775	4	8.9475		IL-6	1	M	LPS-VNS	0.0536047
IL-13	1	VNS	F	11.73	4.355	25.81	4	21.455		IL-6	2	F	CTRL-LPS	0
IL-13	1	VNS	M	17.14	4.8225	46.385	6	41.5625		IL-6	2	F	LPS-VNS	0
IL-13	2	CTRL	F	28.16	17.2625	44.9225	4	27.66		IL-6	2	M	CTRL-LPS	0
IL-13	2	CTRL	M	21.69	1.33	42.8375	4	41.5075		IL-6	2	M	LPS-VNS	0
IL-13	2	LPS	F	149.5	133.15	360.95	5	227.8		IL-6	3	F	CTRL-LPS	0
IL-13	2	LPS	M	25.885	16.355	38.8625	4	22.5075		IL-6	3	F	LPS-VNS	0
IL-13	2	VNS	F	45.02	16.975	102.062	4	85.0875		IL-6	3	M	CTRL-LPS	0
IL-13	2	VNS	M	24.03	17.3275	123.448	6	106.12		IL-6	3	M	LPS-VNS	0
IL-13	3	CTRL	F	25.115	21.0275	29.3125	4	8.285		IP-10	1	F	CTRL-LPS	1.16976
IL-13	3	CTRL	M	22.32	11.825	26.465	3	14.64		IP-10	1	F	LPS-VNS	-0.389437
IL-13	3	LPS	F	1231.28	451.87	1283.44	5	831.57		IP-10	1	M	CTRL-LPS	0.710895
IL-13	3	LPS	M	143.96	85.685	230.382	4	144.697		IP-10	1	M	LPS-VNS	0.824689
IL-13	3	VNS	F	249.745	137.382	1054.93	4	917.55		IP-10	2	F	CTRL-LPS	1.83744
IL-13	3	VNS	M	222.555	174.148	282.46	6	108.312		IP-10	2	F	LPS-VNS	-0.432786
IL-17A	1	CTRL	F	4.875	3.7175	7.3075	4	3.59		IP-10	2	M	CTRL-LPS	1.73594
IL-17A	1	CTRL	M	2.64	1.3875	4.08	4	2.6925		IP-10	2	M	LPS-VNS	0.516598
IL-17A	1	LPS	F	6.605	4.1875	10.275	6	6.0875		IP-10	3	F	CTRL-LPS	3.08557
IL-17A	1	LPS	M	3.035	2.81	3.795	4	0.985		IP-10	3	F	LPS-VNS	-0.925209
IL-17A	1	VNS	F	4.63	3.11	6.315	4	3.205		IP-10	3	M	CTRL-LPS	2.55821
IL-17A	1	VNS	M	4.115	3.15	5.005	6	1.855		IP-10	3	M	LPS-VNS	0.0339334
IL-17A	2	CTRL	F	4.74	3.9575	5.73	4	1.7725		MCP-1	1	F	CTRL-LPS	-0.191568
IL-17A	2	CTRL	M	2.355	1.5575	3.345	4	1.7875		MCP-1	1	F	LPS-VNS	0.545637
IL-17A	2	LPS	F	3.26	3.2	3.37	5	0.17		MCP-1	1	M	CTRL-LPS	0.868636
IL-17A	2	LPS	M	1.19	1.0825	1.225	4	0.1425		MCP-1	1	M	LPS-VNS	0.55377
IL-17A	2	VNS	F	4.67	3.245	7.02	4	3.775		MCP-1	2	F	CTRL-LPS	1.04625
IL-17A	2	VNS	M	2.045	1.315	2.5875	6	1.2725		MCP-1	2	F	LPS-VNS	0.145952
IL-17A	3	CTRL	F	6.01	4.63	10.685	4	6.055		MCP-1	2	M	CTRL-LPS	0.806634
IL-17A	3	CTRL	M	1.22	1.19	2.015	3	0.825		MCP-1	2	M	LPS-VNS	0.140615
IL-17A	3	LPS	F	7.23	6.82	8.94	5	2.12		MCP-1	3	F	CTRL-LPS	0.730123
IL-17A	3	LPS	M	5.455	2.5575	7.8275	4	5.27		MCP-1	3	F	LPS-VNS	0.154849
IL-17A	3	VNS	F	18.395	6.1175	39.6675	4	33.55		MCP-1	3	M	CTRL-LPS	1.48246
IL-17A	3	VNS	M	7.595	6.295	10.2	6	3.905		MCP-1	3	M	LPS-VNS	-0.45585
IL-2	1	CTRL	F	130.855	92.5	166.447	4	73.9475		MCP-3	1	F	CTRL-LPS	0.557895
IL-2	1	CTRL	M	84.035	1.35	194.123	4	192.773		MCP-3	1	F	LPS-VNS	0.209193
IL-2	1	LPS	F	124.065	26.1675	810.398	6	784.23		MCP-3	1	M	CTRL-LPS	0.212983
IL-2	1	LPS	M	16.215	12.18	29.3175	4	17.1375		MCP-3	1	M	LPS-VNS	0.483871
IL-2	1	VNS	F	42.87	21.6675	83.185	4	61.5175		MCP-3	2	F	CTRL-LPS	0.95618
IL-2	1	VNS	M	53.385	30.2575	123.493	6	93.235		MCP-3	2	F	LPS-VNS	-0.0175701
IL-2	2	CTRL	F	63.695	47.9575	94.7125	4	46.755		MCP-3	2	M	CTRL-LPS	0.316306
IL-2	2	CTRL	M	59.495	4.89	115.515	4	110.625		MCP-3	2	M	LPS-VNS	0.259139
IL-2	2	LPS	F	458.13	365.37	740.32	5	374.95		MCP-3	3	F	CTRL-LPS	1.17915
IL-2	2	LPS	M	88.36	50.825	147.702	4	96.8775		MCP-3	3	F	LPS-VNS	-0.186308
IL-2	2	VNS	F	148.085	63.075	424.837	4	361.762		MCP-3	3	M	CTRL-LPS	1.24441
IL-2	2	VNS	M	87.32	64.8775	447.435	6	382.558		MCP-3	3	M	LPS-VNS	0.363889
IL-2	3	CTRL	F	64.72	59.9875	67.665	4	7.6775		MIP-1 alpha	1	F	CTRL-LPS	1.17885
IL-2	3	CTRL	M	46.58	23.965	69.925	3	45.96		MIP-1 alpha	1	F	LPS-VNS	-0.272376
IL-2	3	LPS	F	1762.33	932.79	1998.87	5	1066.08		MIP-1 alpha	1	M	CTRL-LPS	1.55064
IL-2	3	LPS	M	420.555	187.713	655.742	4	468.03		MIP-1 alpha	1	M	LPS-VNS	0.519758
IL-2	3	VNS	F	594.075	400.337	1168.88	4	768.543		MIP-1 alpha	2	F	CTRL-LPS	3.18584
IL-2	3	VNS	M	464.975	360.353	629.778	6	269.425		MIP-1 alpha	2	F	LPS-VNS	-1.05333
IL-4	1	CTRL	F	0.18	0.09	0.5075	4	0.4175		MIP-1 alpha	2	M	CTRL-LPS	1.80094
IL-4	1	CTRL	M	0.09	0.09	0.09	4	0		MIP-1 alpha	2	M	LPS-VNS	-0.179653
IL-4	1	LPS	F	0.27	0.09	0.825	6	0.735		MIP-1 alpha	3	F	CTRL-LPS	5.23373
IL-4	1	LPS	M	0.115	0.09	0.2775	4	0.1875		MIP-1 alpha	3	F	LPS-VNS	-1.0275
IL-4	1	VNS	F	0.09	0.09	0.15	4	0.06		MIP-1 alpha	3	M	CTRL-LPS	4.30765
IL-4	1	VNS	M	0.115	0.09	0.3275	6	0.2375		MIP-1 alpha	3	M	LPS-VNS	-1.16387
IL-4	2	CTRL	F	0.09	0.09	0.21	4	0.12		MIP-2 alpha	1	F	CTRL-LPS	3.7254
IL-4	2	CTRL	M	0.09	0.09	0.09	4	0		MIP-2 alpha	1	F	LPS-VNS	-1.24801
IL-4	2	LPS	F	0.23	0.09	0.45	5	0.36		MIP-2 alpha	1	M	CTRL-LPS	2.96871
IL-4	2	LPS	M	0.09	0.09	0.11	4	0.02		MIP-2 alpha	1	M	LPS-VNS	0.131746
IL-4	2	VNS	F	0.09	0.09	0.12	4	0.03		MIP-2 alpha	2	F	CTRL-LPS	2.5232
IL-4	2	VNS	M	0.09	0.09	0.36	6	0.27		MIP-2 alpha	2	F	LPS-VNS	-0.222062
IL-4	3	CTRL	F	0.115	0.09	0.2325	4	0.1425		MIP-2 alpha	2	M	CTRL-LPS	1.23883
IL-4	3	CTRL	M	0.09	0.09	0.09	3	0		MIP-2 alpha	2	M	LPS-VNS	-0.388174
IL-4	3	LPS	F	0.84	0.75	1.27	5	0.52		MIP-2 alpha	3	F	CTRL-LPS	5.10138
IL-4	3	LPS	M	0.45	0.09	0.9125	4	0.8225		MIP-2 alpha	3	F	LPS-VNS	-1.28228
IL-4	3	VNS	F	0.14	0.09	0.315	4	0.225		MIP-2 alpha	3	M	CTRL-LPS	3.72223
IL-4	3	VNS	M	0.395	0.1525	1.5225	6	1.37		MIP-2 alpha	3	M	LPS-VNS	0.803286
IL-6	1	CTRL	F	0.95	0.95	0.95	4	0		RANTES	1	F	CTRL-LPS	-0.0621294
IL-6	1	CTRL	M	0.95	0.95	0.95	4	0		RANTES	1	F	LPS-VNS	0.0298245
IL-6	1	LPS	F	0.95	0.95	3.9725	6	3.0225		RANTES	1	M	CTRL-LPS	0.319517
IL-6	1	LPS	M	4.755	0.95	11	4	10.05		RANTES	1	M	LPS-VNS	0.640623
IL-6	1	VNS	F	2.345	0.95	4.89	4	3.94		RANTES	2	F	CTRL-LPS	1.42448
IL-6	1	VNS	M	4.935	1.3625	8.695	6	7.3325		RANTES	2	F	LPS-VNS	-0.772904
IL-6	2	CTRL	F	0.95	0.95	0.95	4	0		RANTES	2	M	CTRL-LPS	0.0665345
IL-6	2	CTRL	M	0.95	0.95	0.95	4	0		RANTES	2	M	LPS-VNS	0.700923
IL-6	2	LPS	F	0.95	0.95	0.95	5	0		RANTES	3	F	CTRL-LPS	2.21583
IL-6	2	LPS	M	0.95	0.95	0.95	4	0		RANTES	3	F	LPS-VNS	-1.02727
IL-6	2	VNS	F	0.95	0.95	0.95	4	0		RANTES	3	M	CTRL-LPS	1.6925
IL-6	2	VNS	M	0.95	0.95	0.95	6	0		RANTES	3	M	LPS-VNS	-0.120812
IL-6	3	CTRL	F	0.95	0.95	0.95	4	0		TNF alpha	1	F	CTRL-LPS	-0.212884
IL-6	3	CTRL	M	0.95	0.95	0.95	3	0		TNF alpha	1	F	LPS-VNS	-1.35426
IL-6	3	LPS	F	0.95	0.95	0.95	5	0		TNF alpha	1	M	CTRL-LPS	-1.52462
IL-6	3	LPS	M	0.95	0.95	0.95	4	0		TNF alpha	1	M	LPS-VNS	1.08926
IL-6	3	VNS	F	0.95	0.95	0.95	4	0		TNF alpha	2	F	CTRL-LPS	3.82767
IL-6	3	VNS	M	0.95	0.95	0.95	6	0		TNF alpha	2	F	LPS-VNS	-3.09598
IP-10	1	CTRL	F	94.8	79.2125	109.85	4	30.6375		TNF alpha	2	M	CTRL-LPS	0.134905
IP-10	1	CTRL	M	75.885	35.755	112.25	4	76.495		TNF alpha	2	M	LPS-VNS	0.25396
IP-10	1	LPS	F	213.275	120.752	525.457	6	404.705		TNF alpha	3	F	CTRL-LPS	5.97387
IP-10	1	LPS	M	124.21	113.055	137.03	4	23.975		TNF alpha	3	F	LPS-VNS	-2.47657
IP-10	1	VNS	F	162.82	158.36	173.752	4	15.3925		TNF alpha	3	M	CTRL-LPS	4.18574
IP-10	1	VNS	M	219.995	190.155	241.36	6	51.205		TNF alpha	3	M	LPS-VNS	-0.397894
IP-10	2	CTRL	F	81.245	73.305	92.6275	4	19.3225
IP-10	2	CTRL	M	52.575	39.5625	80.91	4	41.3475
IP-10	2	LPS	F	290.35	271.38	493.17	5	221.79
IP-10	2	LPS	M	175.125	158.548	196.498	4	37.95
IP-10	2	VNS	F	215.1	197.69	274.647	4	76.9575
IP-10	2	VNS	M	250.53	188.863	297.265	6	108.403
IP-10	3	CTRL	F	67.26	63.58	76.9725	4	13.3925
IP-10	3	CTRL	M	47.12	39.16	74.45	3	35.29
IP-10	3	LPS	F	570.96	381.75	621.98	5	240.23
IP-10	3	LPS	M	277.525	118.278	419.502	4	301.225
IP-10	3	VNS	F	300.67	236.365	417.5	4	181.135
IP-10	3	VNS	M	284.13	198.16	390.507	6	192.347
MCP-1	1	CTRL	F	2080.11	1727.43	2557.73	4	830.303
MCP-1	1	CTRL	M	1313.54	1267.35	1480.46	4	213.118
MCP-1	1	LPS	F	1821.46	1369.73	3551.67	6	2181.94
MCP-1	1	LPS	M	2398.43	2212.23	2580.5	4	368.272
MCP-1	1	VNS	F	2658.72	2113.03	3352.46	4	1239.42
MCP-1	1	VNS	M	3520.7	3226.87	3884.21	6	657.335
MCP-1	2	CTRL	F	1511.28	1187.32	1926.05	4	738.732
MCP-1	2	CTRL	M	1493.1	1360.06	1589.57	4	229.518
MCP-1	2	LPS	F	3121.02	3109.56	3250.12	5	140.56
MCP-1	2	LPS	M	2611.62	2425.07	2869.51	4	444.45
MCP-1	2	VNS	F	3453.28	3330.38	3771.81	4	441.43
MCP-1	2	VNS	M	2878.99	2468.36	3080.89	6	612.537
MCP-1	3	CTRL	F	1432.04	1064.7	1805.39	4	740.69
MCP-1	3	CTRL	M	951.94	921.17	1140.41	3	219.245
MCP-1	3	LPS	F	2375.44	1992.54	2533.04	5	540.5
MCP-1	3	LPS	M	2659.96	1599.99	3630.28	4	2030.29
MCP-1	3	VNS	F	2644.59	2030.68	3149.13	4	1118.45
MCP-1	3	VNS	M	1939.33	1873.28	2282.03	6	408.748
MCP-3	1	CTRL	F	321.73	315.41	331.363	4	15.9525
MCP-3	1	CTRL	M	298.43	241.085	358.42	4	117.335
MCP-3	1	LPS	F	473.625	400.147	567.15	6	167.002
MCP-3	1	LPS	M	345.905	300.592	398.123	4	97.53
MCP-3	1	VNS	F	547.53	484.815	580.365	4	95.55
MCP-3	1	VNS	M	483.745	360.817	658.453	6	297.635
MCP-3	2	CTRL	F	292.31	280.973	299.055	4	18.0825
MCP-3	2	CTRL	M	287.695	245.79	321.99	4	76.2
MCP-3	2	LPS	F	567.13	429.97	658.17	5	228.2
MCP-3	2	LPS	M	358.22	299.202	407.387	4	108.185
MCP-3	2	VNS	F	560.265	462.84	646.862	4	184.023
MCP-3	2	VNS	M	428.705	409.02	479.98	6	70.96
MCP-3	3	CTRL	F	261.235	203.748	298.82	4	95.0725
MCP-3	3	CTRL	M	129.99	124.255	210.53	3	86.275
MCP-3	3	LPS	F	591.55	475.77	602.18	5	126.41
MCP-3	3	LPS	M	307.975	224.47	415.658	4	191.188
MCP-3	3	VNS	F	519.885	500.56	536.03	4	35.47
MCP-3	3	VNS	M	396.33	393.397	460.658	6	67.26
MIP-1 alpha	1	CTRL	F	126.815	105.555	151.428	4	45.8725
MIP-1 alpha	1	CTRL	M	80.685	14.155	167.562	4	153.407
MIP-1 alpha	1	LPS	F	287.105	165.44	2249.76	6	2084.32
MIP-1 alpha	1	LPS	M	236.365	179.982	283.845	4	103.862
MIP-1 alpha	1	VNS	F	237.71	202.615	264.79	4	62.175
MIP-1 alpha	1	VNS	M	338.88	318.905	405.348	6	86.4425
MIP-1 alpha	2	CTRL	F	83.66	74.7875	97.84	4	23.0525
MIP-1 alpha	2	CTRL	M	73.08	29.435	118.207	4	88.7725
MIP-1 alpha	2	LPS	F	761.29	359.66	2341.83	5	1982.17
MIP-1 alpha	2	LPS	M	254.645	224.52	273.625	4	49.105
MIP-1 alpha	2	VNS	F	366.83	273.53	921.638	4	648.108
MIP-1 alpha	2	VNS	M	224.83	189.702	485.077	6	295.375
MIP-1 alpha	3	CTRL	F	76.57	72.6525	83.6825	4	11.03
MIP-1 alpha	3	CTRL	M	59.48	37.29	74.075	3	36.785
MIP-1 alpha	3	LPS	F	2881.16	2299.5	2881.16	5	581.66
MIP-1 alpha	3	LPS	M	1177.88	155.838	2311.41	4	2155.57
MIP-1 alpha	3	VNS	F	1413.38	510.967	2438.71	4	1927.74
MIP-1 alpha	3	VNS	M	525.705	422.71	615.08	6	192.37
MIP-2 alpha	1	CTRL	F	17.85	11.7425	22.1475	4	10.405
MIP-2 alpha	1	CTRL	M	17.16	0.26	35.39	4	35.13
MIP-2 alpha	1	LPS	F	236.1	60.7875	718.808	6	658.02
MIP-2 alpha	1	LPS	M	134.335	104.843	156.683	4	51.84
MIP-2 alpha	1	VNS	F	99.405	22.905	171.287	4	148.382
MIP-2 alpha	1	VNS	M	147.18	109.597	222.18	6	112.582
MIP-2 alpha	2	CTRL	F	9.505	4.285	15.965	4	11.68
MIP-2 alpha	2	CTRL	M	5.11	0.26	10.385	4	10.125
MIP-2 alpha	2	LPS	F	54.64	52.73	143.31	5	90.58
MIP-2 alpha	2	LPS	M	12.06	11.22	20.9975	4	9.7775
MIP-2 alpha	2	VNS	F	46.845	37.5	83.17	4	45.67
MIP-2 alpha	2	VNS	M	9.215	5.68	37.095	6	31.415
MIP-2 alpha	3	CTRL	F	7.345	5.3025	9.0175	4	3.715
MIP-2 alpha	3	CTRL	M	4.65	2.455	5.895	3	3.44
MIP-2 alpha	3	LPS	F	252.15	239.32	359.65	5	120.33
MIP-2 alpha	3	LPS	M	61.37	38.3425	86.7675	4	48.425
MIP-2 alpha	3	VNS	F	103.67	61.365	218.545	4	157.18
MIP-2 alpha	3	VNS	M	107.095	85.5975	123.5	6	37.9025
RANTES	1	CTRL	F	24025.2	19543.8	28223.4	4	8679.61
RANTES	1	CTRL	M	11762.1	9282.07	17065.7	4	7783.59
RANTES	1	LPS	F	23012.5	11678.4	84330.3	6	72651.9
RANTES	1	LPS	M	14678.1	12845.1	15793.3	4	2948.26
RANTES	1	VNS	F	23493.2	21833.7	25707.7	4	3873.96
RANTES	1	VNS	M	22883.2	16879.3	26078.2	6	9198.89
RANTES	2	CTRL	F	18077.7	15505.9	20936.2	4	5430.34
RANTES	2	CTRL	M	17978.9	13596.2	21124.7	4	7528.45
RANTES	2	LPS	F	48523.5	28055.2	70151.1	5	42096
RANTES	2	LPS	M	18827.4	18549.6	23237.9	4	4688.33
RANTES	2	VNS	F	28397.8	25052.2	40433	4	15380.9
RANTES	2	VNS	M	30604.8	23186.7	41098	6	17911.3
RANTES	3	CTRL	F	16867.8	13871.1	19607.6	4	5736.56
RANTES	3	CTRL	M	11638.2	11553.6	12355.5	3	801.915
RANTES	3	LPS	F	78359.3	53012	87482.5	5	34470.5
RANTES	3	LPS	M	37616.7	14521	61794.3	4	47273.3
RANTES	3	VNS	F	38446	24744	57030.7	4	32286.6
RANTES	3	VNS	M	34594.9	20918.5	49546.4	6	28627.9
TNF alpha	1	CTRL	F	317.445	219.183	413.215	4	194.032
TNF alpha	1	CTRL	M	181.675	12.5975	506.387	4	493.79
TNF alpha	1	LPS	F	273.895	66.0025	15418.4	6	15352.4
TNF alpha	1	LPS	M	63.145	36.86	100.567	4	63.7075
TNF alpha	1	VNS	F	107.13	66.99	218.232	4	151.243
TNF alpha	1	VNS	M	134.35	75.3775	279.955	6	204.577
TNF alpha	2	CTRL	F	152.5	117.635	192.395	4	74.76
TNF alpha	2	CTRL	M	154.56	36.28	277.572	4	241.292
TNF alpha	2	LPS	F	2165.28	481.72	3589.06	5	3107.34
TNF alpha	2	LPS	M	169.71	110.07	350.377	4	240.308
TNF alpha	2	VNS	F	253.24	127.838	1499.07	4	1371.23
TNF alpha	2	VNS	M	202.375	164.39	939.653	6	775.263
TNF alpha	3	CTRL	F	169.435	151.935	184.873	4	32.9375
TNF alpha	3	CTRL	M	84.71	50.23	103.19	3	52.96
TNF alpha	3	LPS	F	10649.2	4909.62	18160.2	5	13250.5
TNF alpha	3	LPS	M	1541.59	447.288	2656.84	4	2209.55
TNF alpha	3	VNS	F	1913.36	608.622	7899.79	4	7291.17
TNF alpha	3	VNS	M	1170.01	1074.92	1510.71	6	435.787

## Sheet: Cytokines Statistical Analysis
Compare	Cytokine	Time	Levene_p	Shapiro_p	Method	Interaction_F(df)	Interaction_p	Interaction_q	Interaction_eta2p	Group_F(df)	Group_p	Group_q	Group_eta2p	Sex_F(df)	Sex_p	Sex_q	Sex_eta2p	t-test Male_p	t-test Female_p
CTRL-LPS	Eotaxin	1	0.324	0.873	Two-Way ANOVA	0.02 (1,14)	0.904	0.904	0.001	2.37 (1,14)	0.146	0.146	0.145	7.68 (1,14)	0.015	0.03	0.354
CTRL-LPS	Eotaxin	2	0.484	0.675	Two-Way ANOVA	2.03 (1,13)	0.178	0.356	0.135	6.92 (1,13)	0.0208	0.0415	0.347	4.51 (1,13)	0.0534	0.0534	0.258
CTRL-LPS	Eotaxin	3	0.0112	0.839	Two-Way ANOVA (robust)	0.62 (1,12)	0.445	0.616	0.049	1.30 (1,12)	0.277	0.554	0.098	0.37 (1,12)	0.556	0.762	0.03
CTRL-LPS	G-CSF	1	0.782	0.172	Two-Way ANOVA	0.93 (1,14)	0.351	0.701	0.062	1.16 (1,14)	0.3	0.362	0.076	0.69 (1,14)	0.42	0.84	0.047
CTRL-LPS	G-CSF	2	0.943	0.481	Two-Way ANOVA	0.26 (1,13)	0.621	0.621	0.019	0.70 (1,13)	0.418	0.431	0.051	4.63 (1,13)	0.0507	0.0549	0.263
CTRL-LPS	G-CSF	3	0.501	0.029	ART ANOVA	2.51 (1,12)	0.139	0.279	0.173	13.31 (1,12)	0.00334	0.00667	0.526	11.92 (1,12)	0.00479	0.00957	0.498
CTRL-LPS	GRO alpha	1	0.000261	0.647	Two-Way ANOVA (robust)	2.04 (1,14)	0.175	0.35	0.127	19.95 (1,14)	0.000532	0.00106	0.588	0.32 (1,14)	0.581	0.581	0.022
CTRL-LPS	GRO alpha	2	0.0536	0.625	Two-Way ANOVA	1.49 (1,13)	0.245	0.245	0.103	5.57 (1,13)	0.0346	0.0692	0.3	0.15 (1,13)	0.702	0.702	0.012
CTRL-LPS	GRO alpha	3	0.0286	0.715	Two-Way ANOVA (robust)	0.53 (1,12)	0.482	0.779	0.042	1.77 (1,12)	0.209	0.417	0.128	1.29 (1,12)	0.278	0.486	0.097
CTRL-LPS	IFN gamma	1	0.0853	0.321	Two-Way ANOVA	3.61 (1,14)	0.0782	0.156	0.205	8.60 (1,14)	0.0109	0.0218	0.381	1.70 (1,14)	0.213	0.319	0.108
CTRL-LPS	IFN gamma	2	0.643	0.543	Two-Way ANOVA	3.18 (1,13)	0.098	0.196	0.196	1.89 (1,13)	0.193	0.385	0.127	1.16 (1,13)	0.3	0.601	0.082
CTRL-LPS	IFN gamma	3	0.0598	0.504	Two-Way ANOVA	1.80 (1,12)	0.205	0.41	0.13	6.00 (1,12)	0.0307	0.0613	0.333	3.04 (1,12)	0.107	0.213	0.202
CTRL-LPS	IL-1 alpha	1	0.106	0.000184	ART ANOVA	1.26 (1,14)	0.281	0.281	0.082	3.53 (1,14)	0.0814	0.163	0.201	3.53 (1,14)	0.0814	0.163	0.201
CTRL-LPS	IL-1 alpha	2	0.0349	1.69e-05	ART ANOVA	5.86 (1,13)	0.0308	0.0616	0.311	5.86 (1,13)	0.0308	0.0616	0.311	5.86 (1,13)	0.0308	0.0616	0.311
CTRL-LPS	IL-1 alpha	3	0.0374	0.0623	Two-Way ANOVA (robust)	9.60 (1,12)	0.00922	0.0184	0.444									0.0928	0.00146
CTRL-LPS	IL-1 beta	1	0.0511	0.493	Two-Way ANOVA	0.02 (1,14)	0.896	0.896	0.001	0.05 (1,14)	0.82	0.9	0.004	1.97 (1,14)	0.182	0.182	0.124
CTRL-LPS	IL-1 beta	2	0.107	0.494	Two-Way ANOVA	2.03 (1,13)	0.178	0.178	0.135	8.50 (1,13)	0.012	0.0241	0.395	4.62 (1,13)	0.0509	0.0674	0.262
CTRL-LPS	IL-1 beta	3	0.379	0.596	Two-Way ANOVA	0.65 (1,12)	0.437	0.437	0.051	27.92 (1,12)	0.000193	0.000387	0.699	6.74 (1,12)	0.0234	0.0362	0.36
CTRL-LPS	IL-2	1	0.0351	0.931	Two-Way ANOVA (robust)	0.03 (1,14)	0.875	0.875	0.002	0.01 (1,14)	0.917	0.947	0.001	3.30 (1,14)	0.0906	0.181	0.191
CTRL-LPS	IL-2	2	0.0682	0.817	Two-Way ANOVA	0.29 (1,13)	0.602	0.602	0.021	7.14 (1,13)	0.0192	0.0384	0.354	6.16 (1,13)	0.0275	0.0551	0.321
CTRL-LPS	IL-2	3	0.277	0.283	Two-Way ANOVA	0.16 (1,12)	0.697	0.697	0.013	25.07 (1,12)	0.000306	0.000611	0.676	6.14 (1,12)	0.029	0.029	0.339
CTRL-LPS	IL-4	1	0.059	0.0411	ART ANOVA	0.21 (1,14)	0.658	0.658	0.014	0.47 (1,14)	0.502	0.611	0.033	0.53 (1,14)	0.48	0.961	0.036
CTRL-LPS	IL-4	2	0.223	0.138	Two-Way ANOVA	0.19 (1,13)	0.673	0.673	0.014	0.82 (1,13)	0.383	0.765	0.059	3.25 (1,13)	0.0949	0.19	0.2
CTRL-LPS	IL-4	3	0.143	0.523	Two-Way ANOVA	0.07 (1,12)	0.792	0.792	0.006	6.12 (1,12)	0.0292	0.0585	0.338	1.61 (1,12)	0.229	0.457	0.118
CTRL-LPS	IL-6	1	0.0655	0.0446	ART ANOVA	0.88 (1,14)	0.365	0.729	0.059	6.02 (1,14)	0.0279	0.0557	0.301	0.73 (1,14)	0.406	0.445	0.05
CTRL-LPS	IL-6	2	0.534	2.48e-06	ART ANOVA	0.68 (1,13)	0.423	0.423	0.05	0.68 (1,13)	0.423	0.423	0.05	0.68 (1,13)	0.423	0.423	0.05
CTRL-LPS	IL-6	3	0.577	5.16e-06	ART ANOVA	0.39 (1,12)	0.546	0.546	0.031	0.58 (1,12)	0.461	0.461	0.046	0.58 (1,12)	0.461	0.461	0.046
CTRL-LPS	IL-10	1	0.368	0.00728	ART ANOVA	0.13 (1,14)	0.728	0.728	0.009	1.51 (1,14)	0.24	0.48	0.097	4.21 (1,14)	0.0593	0.119	0.231
CTRL-LPS	IL-10	2	0.0107	0.000264	ART ANOVA	15.39 (1,13)	0.00175	0.00349	0.542									1	0.0442
CTRL-LPS	IL-10	3	0.151	0.0347	ART ANOVA	1.64 (1,12)	0.224	0.449	0.12	11.65 (1,12)	0.00515	0.0103	0.493	1.64 (1,12)	0.224	0.449	0.12
CTRL-LPS	IL-12p70	1	0.563	0.496	Two-Way ANOVA	0.29 (1,14)	0.597	0.597	0.02	1.09 (1,14)	0.315	0.315	0.072	3.46 (1,14)	0.084	0.168	0.198
CTRL-LPS	IL-12p70	2	0.59	0.000132	ART ANOVA	0.25 (1,13)	0.628	0.628	0.019	0.25 (1,13)	0.628	0.656	0.019	1.78 (1,13)	0.205	0.34	0.12
CTRL-LPS	IL-12p70	3	0.156	0.337	Two-Way ANOVA	0.05 (1,12)	0.823	0.823	0.004	0.73 (1,12)	0.41	0.815	0.057	6.93 (1,12)	0.0218	0.0437	0.366
CTRL-LPS	IL-13	1	0.0465	0.878	Two-Way ANOVA (robust)	0.37 (1,14)	0.555	0.555	0.025	0.16 (1,14)	0.693	0.752	0.011	3.63 (1,14)	0.0774	0.155	0.206
CTRL-LPS	IL-13	2	0.217	0.502	Two-Way ANOVA	0.72 (1,13)	0.41	0.41	0.053	5.60 (1,13)	0.0342	0.0684	0.301	7.16 (1,13)	0.019	0.0381	0.355
CTRL-LPS	IL-13	3	0.545	0.629	Two-Way ANOVA	1.23 (1,12)	0.289	0.289	0.093	30.83 (1,12)	0.000125	0.00025	0.72	7.81 (1,12)	0.0162	0.0162	0.394
CTRL-LPS	IL-17A	1	0.421	0.305	Two-Way ANOVA	0.36 (1,14)	0.56	0.56	0.025	0.34 (1,14)	0.568	0.568	0.024	2.71 (1,14)	0.122	0.133	0.162
CTRL-LPS	IL-17A	2	0.558	0.0566	Two-Way ANOVA	0.48 (1,13)	0.501	0.779	0.035	3.73 (1,13)	0.0755	0.151	0.223	9.13 (1,13)	0.00981	0.00981	0.413
CTRL-LPS	IL-17A	3	0.468	0.428	Two-Way ANOVA	0.42 (1,12)	0.531	0.897	0.034	1.35 (1,12)	0.269	0.269	0.101	8.11 (1,12)	0.0147	0.0294	0.403
CTRL-LPS	IP-10	1	0.191	0.0891	Two-Way ANOVA	0.30 (1,14)	0.59	0.59	0.021	5.20 (1,14)	0.0388	0.0776	0.271	2.51 (1,14)	0.135	0.27	0.152
CTRL-LPS	IP-10	2	0.543	0.0532	Two-Way ANOVA	1.10 (1,13)	0.312	0.312	0.078	29.11 (1,13)	0.000122	0.000244	0.691	5.94 (1,13)	0.0299	0.0545	0.314
CTRL-LPS	IP-10	3	0.132	0.619	Two-Way ANOVA	0.92 (1,12)	0.355	0.355	0.072	22.52 (1,12)	0.000475	0.000951	0.652	3.55 (1,12)	0.084	0.084	0.228
CTRL-LPS	MCP-1	1	0.215	0.722	Two-Way ANOVA	1.50 (1,14)	0.241	0.482	0.097	1.52 (1,14)	0.237	0.237	0.098	0.46 (1,14)	0.51	0.51	0.032
CTRL-LPS	MCP-1	2	0.167	0.502	Two-Way ANOVA	0.35 (1,13)	0.564	0.62	0.026	22.67 (1,13)	0.000372	0.000744	0.636	0.40 (1,13)	0.537	0.537	0.03
CTRL-LPS	MCP-1	3	0.0875	0.308	Two-Way ANOVA	0.13 (1,12)	0.722	0.932	0.011	6.68 (1,12)	0.0239	0.0478	0.358	0.48 (1,12)	0.5	0.629	0.039
CTRL-LPS	MCP-3	1	0.195	0.701	Two-Way ANOVA	0.77 (1,14)	0.394	0.394	0.052	4.46 (1,14)	0.0531	0.106	0.242	2.59 (1,14)	0.13	0.259	0.156
CTRL-LPS	MCP-3	2	0.386	0.23	Two-Way ANOVA	3.15 (1,13)	0.0993	0.199	0.195	13.11 (1,13)	0.00311	0.00621	0.502	4.88 (1,13)	0.0457	0.0457	0.273
CTRL-LPS	MCP-3	3	0.398	0.957	Two-Way ANOVA	0.53 (1,12)	0.482	0.482	0.042	9.38 (1,12)	0.00985	0.0197	0.439	4.85 (1,12)	0.0479	0.0483	0.288
CTRL-LPS	MIP-1 alpha	1	0.0366	0.561	Two-Way ANOVA (robust)	0.13 (1,14)	0.726	0.726	0.009	3.96 (1,14)	0.0665	0.133	0.221	1.30 (1,14)	0.274	0.548	0.085
CTRL-LPS	MIP-1 alpha	2	0.0126	0.933	Two-Way ANOVA (robust)	0.77 (1,13)	0.397	0.427	0.056	18.90 (1,13)	0.00079	0.00158	0.593	3.84 (1,13)	0.0719	0.0719	0.228
CTRL-LPS	MIP-1 alpha	3	0.0162	0.374	Two-Way ANOVA (robust)	0.32 (1,12)	0.58	0.657	0.026	19.06 (1,12)	0.000919	0.00184	0.614	2.26 (1,12)	0.159	0.159	0.159
CTRL-LPS	MIP-2 alpha	1	0.0202	0.35	Two-Way ANOVA (robust)	0.56 (1,14)	0.467	0.542	0.038	8.37 (1,14)	0.0118	0.0236	0.374	0.47 (1,14)	0.503	0.503	0.033
CTRL-LPS	MIP-2 alpha	2	0.0573	0.168	Two-Way ANOVA	0.02 (1,13)	0.904	0.904	0.001	11.39 (1,13)	0.00497	0.00994	0.467	4.81 (1,13)	0.0472	0.0472	0.27
CTRL-LPS	MIP-2 alpha	3	0.692	0.094	Two-Way ANOVA	0.43 (1,12)	0.526	0.526	0.034	35.25 (1,12)	6.85e-05	0.000137	0.746	6.89 (1,12)	0.0222	0.0222	0.365
CTRL-LPS	RANTES	1	0.0445	0.408	Two-Way ANOVA (robust)	0.03 (1,14)	0.874	0.874	0.002	0.11 (1,14)	0.748	0.748	0.008	3.67 (1,14)	0.0762	0.152	0.208
CTRL-LPS	RANTES	2	0.491	0.655	Two-Way ANOVA	2.49 (1,13)	0.139	0.172	0.161	9.10 (1,13)	0.00992	0.0198	0.412	3.70 (1,13)	0.0764	0.0764	0.222
CTRL-LPS	RANTES	3	0.03	0.682	Two-Way ANOVA (robust)	0.52 (1,12)	0.483	0.483	0.042	13.05 (1,12)	0.00357	0.00713	0.521	2.76 (1,12)	0.122	0.15	0.187
CTRL-LPS	TNF alpha	1	0.0396	0.72	Two-Way ANOVA (robust)	0.11 (1,14)	0.74	0.74	0.008	0.01 (1,14)	0.933	0.981	0.001	2.39 (1,14)	0.145	0.289	0.146
CTRL-LPS	TNF alpha	2	0.138	0.988	Two-Way ANOVA	2.29 (1,13)	0.154	0.154	0.15	7.30 (1,13)	0.0181	0.0362	0.36	4.95 (1,13)	0.0445	0.089	0.276
CTRL-LPS	TNF alpha	3	0.204	0.166	Two-Way ANOVA	0.95 (1,12)	0.35	0.35	0.073	37.99 (1,12)	4.85e-05	9.7e-05	0.76	9.26 (1,12)	0.0102	0.0204	0.436
LPS-VNS	Eotaxin	1	0.231	0.863	Two-Way ANOVA	0.56 (1,16)	0.467	0.904	0.034	3.28 (1,16)	0.089	0.146	0.17	3.88 (1,16)	0.0664	0.0664	0.195
LPS-VNS	Eotaxin	2	0.336	0.786	Two-Way ANOVA	0.38 (1,15)	0.545	0.545	0.025	2.24 (1,15)	0.155	0.155	0.13	7.66 (1,15)	0.0144	0.0288	0.338
LPS-VNS	Eotaxin	3	0.00922	0.829	Two-Way ANOVA (robust)	0.26 (1,15)	0.616	0.616	0.017	0.01 (1,15)	0.906	0.906	0.001	0.09 (1,15)	0.762	0.762	0.006
LPS-VNS	G-CSF	1	0.28	0.0503	Two-Way ANOVA	0.02 (1,16)	0.899	0.899	0.001	0.88 (1,16)	0.362	0.362	0.052	0.00 (1,16)	0.955	0.955	0
LPS-VNS	G-CSF	2	0.3	0.41	Two-Way ANOVA	0.67 (1,15)	0.426	0.621	0.043	0.66 (1,15)	0.431	0.431	0.042	4.33 (1,15)	0.0549	0.0549	0.224
LPS-VNS	G-CSF	3	0.359	0.115	Two-Way ANOVA	0.58 (1,15)	0.458	0.458	0.037	0.07 (1,15)	0.797	0.797	0.005	3.28 (1,15)	0.0902	0.0902	0.179
LPS-VNS	GRO alpha	1	0.00845	0.507	Two-Way ANOVA (robust)	0.02 (1,16)	0.893	0.893	0.001	0.08 (1,16)	0.783	0.783	0.005	1.85 (1,16)	0.193	0.386	0.103
LPS-VNS	GRO alpha	2	0.00243	0.849	Two-Way ANOVA (robust)	2.82 (1,15)	0.114	0.227	0.158	0.33 (1,15)	0.574	0.574	0.022	0.56 (1,15)	0.466	0.702	0.036
LPS-VNS	GRO alpha	3	0.017	0.518	Two-Way ANOVA (robust)	0.08 (1,15)	0.779	0.779	0.005	0.61 (1,15)	0.446	0.446	0.039	0.51 (1,15)	0.486	0.486	0.033
LPS-VNS	IFN gamma	1	0.125	0.0207	ART ANOVA	0.13 (1,16)	0.726	0.726	0.008	1.16 (1,16)	0.297	0.297	0.068	1.06 (1,16)	0.319	0.319	0.062
LPS-VNS	IFN gamma	2	0.376	0.114	Two-Way ANOVA	0.23 (1,15)	0.64	0.64	0.015	0.00 (1,15)	0.963	0.963	0	0.01 (1,15)	0.944	0.944	0
LPS-VNS	IFN gamma	3	0.0265	0.543	Two-Way ANOVA (robust)	0.00 (1,15)	0.968	0.968	0	0.24 (1,15)	0.632	0.632	0.016	0.11 (1,15)	0.744	0.744	0.007
LPS-VNS	IL-1 alpha	1	0.236	0.00936	ART ANOVA	2.55 (1,16)	0.13	0.26	0.137	0.05 (1,16)	0.824	0.824	0.003	0.49 (1,16)	0.495	0.495	0.03
LPS-VNS	IL-1 alpha	2	0.146	0.00208	ART ANOVA	2.81 (1,15)	0.114	0.114	0.158	1.62 (1,15)	0.223	0.223	0.097	3.50 (1,15)	0.0809	0.0809	0.189
LPS-VNS	IL-1 alpha	3	0.492	0.00727	ART ANOVA	4.57 (1,15)	0.0493	0.0493	0.234									0.665	0.174
LPS-VNS	IL-1 beta	1	0.061	0.0367	ART ANOVA	2.93 (1,16)	0.106	0.212	0.155	0.02 (1,16)	0.9	0.9	0.001	2.18 (1,16)	0.159	0.182	0.12
LPS-VNS	IL-1 beta	2	0.435	0.264	Two-Way ANOVA	3.78 (1,15)	0.0708	0.142	0.201	0.42 (1,15)	0.527	0.527	0.027	3.89 (1,15)	0.0674	0.0674	0.206
LPS-VNS	IL-1 beta	3	0.171	0.875	Two-Way ANOVA	2.67 (1,15)	0.123	0.246	0.151	0.88 (1,15)	0.364	0.364	0.055	5.29 (1,15)	0.0362	0.0362	0.261
LPS-VNS	IL-2	1	0.294	0.877	Two-Way ANOVA	1.39 (1,16)	0.255	0.511	0.08	0.00 (1,16)	0.947	0.947	0	1.40 (1,16)	0.254	0.254	0.08
LPS-VNS	IL-2	2	0.911	0.168	Two-Way ANOVA	3.03 (1,15)	0.102	0.204	0.168	0.54 (1,15)	0.473	0.473	0.035	3.53 (1,15)	0.0798	0.0798	0.191
LPS-VNS	IL-2	3	0.254	0.901	Two-Way ANOVA	3.36 (1,15)	0.0867	0.173	0.183	0.13 (1,15)	0.724	0.724	0.009	8.25 (1,15)	0.0116	0.0232	0.355
LPS-VNS	IL-4	1	0.463	0.0185	ART ANOVA	0.68 (1,16)	0.423	0.658	0.041	0.27 (1,16)	0.611	0.611	0.017	0.00 (1,16)	0.966	0.966	0
LPS-VNS	IL-4	2	0.5	0.0757	Two-Way ANOVA	2.55 (1,15)	0.131	0.262	0.145	0.06 (1,15)	0.816	0.816	0.004	0.14 (1,15)	0.713	0.713	0.009
LPS-VNS	IL-4	3	0.653	0.275	Two-Way ANOVA	1.98 (1,15)	0.179	0.359	0.117	0.74 (1,15)	0.402	0.402	0.047	0.00 (1,15)	0.993	0.993	0
LPS-VNS	IL-6	1	0.717	0.0194	ART ANOVA	0.01 (1,16)	0.944	0.944	0	0.53 (1,16)	0.478	0.478	0.032	0.61 (1,16)	0.445	0.445	0.037
LPS-VNS	IL-6	2	0.454	5.95e-07	ART ANOVA	1.47 (1,15)	0.244	0.423	0.089	0.87 (1,15)	0.367	0.423	0.055	0.87 (1,15)	0.367	0.423	0.055
LPS-VNS	IL-6	3	0.454	5.95e-07	ART ANOVA	1.47 (1,15)	0.244	0.488	0.089	0.87 (1,15)	0.367	0.461	0.055	0.87 (1,15)	0.367	0.461	0.055
LPS-VNS	IL-10	1	0.859	0.0237	ART ANOVA	0.26 (1,16)	0.617	0.728	0.016	0.07 (1,16)	0.798	0.798	0.004	0.00 (1,16)	0.978	0.978	0
LPS-VNS	IL-10	2	0.17	0.377	Two-Way ANOVA	2.97 (1,15)	0.106	0.106	0.165	5.13 (1,15)	0.0388	0.0388	0.255	4.53 (1,15)	0.0502	0.0502	0.232
LPS-VNS	IL-10	3	0.665	0.504	Two-Way ANOVA	0.45 (1,15)	0.514	0.514	0.029	2.03 (1,15)	0.174	0.174	0.119	0.00 (1,15)	0.961	0.961	0
LPS-VNS	IL-12p70	1	0.508	0.0998	Two-Way ANOVA	2.21 (1,16)	0.156	0.313	0.121	2.98 (1,16)	0.103	0.207	0.157	1.66 (1,16)	0.216	0.216	0.094
LPS-VNS	IL-12p70	2	0.662	0.000182	ART ANOVA	0.79 (1,15)	0.387	0.628	0.05	0.21 (1,15)	0.656	0.656	0.014	0.97 (1,15)	0.34	0.34	0.061
LPS-VNS	IL-12p70	3	0.748	0.393	Two-Way ANOVA	0.93 (1,15)	0.349	0.699	0.059	0.06 (1,15)	0.815	0.815	0.004	2.83 (1,15)	0.113	0.113	0.159
LPS-VNS	IL-13	1	0.378	0.945	Two-Way ANOVA	2.33 (1,16)	0.146	0.292	0.127	0.10 (1,16)	0.752	0.752	0.006	1.40 (1,16)	0.254	0.254	0.08
LPS-VNS	IL-13	2	0.847	0.486	Two-Way ANOVA	4.29 (1,15)	0.056	0.112	0.222	1.39 (1,15)	0.257	0.257	0.085	3.62 (1,15)	0.0764	0.0764	0.195
LPS-VNS	IL-13	3	0.453	0.695	Two-Way ANOVA	2.99 (1,15)	0.104	0.209	0.166	0.11 (1,15)	0.745	0.745	0.007	7.95 (1,15)	0.0129	0.0162	0.346
LPS-VNS	IL-17A	1	0.245	0.0221	ART ANOVA	1.05 (1,16)	0.321	0.56	0.062	0.42 (1,16)	0.525	0.568	0.026	2.50 (1,16)	0.133	0.133	0.135
LPS-VNS	IL-17A	2	0.314	0.231	Two-Way ANOVA	0.08 (1,15)	0.779	0.779	0.005	1.69 (1,15)	0.213	0.213	0.101	8.80 (1,15)	0.00962	0.00981	0.37
LPS-VNS	IL-17A	3	0.132	0.633	Two-Way ANOVA	0.02 (1,15)	0.897	0.897	0.001	2.43 (1,15)	0.14	0.269	0.139	4.08 (1,15)	0.0617	0.0617	0.214
LPS-VNS	IP-10	1	0.125	0.0103	ART ANOVA	3.41 (1,16)	0.0833	0.167	0.176	0.03 (1,16)	0.864	0.864	0.002	1.21 (1,16)	0.288	0.288	0.07
LPS-VNS	IP-10	2	0.642	0.0491	ART ANOVA	7.23 (1,15)	0.0168	0.0337	0.325									0.171	0.111
LPS-VNS	IP-10	3	0.139	0.544	Two-Way ANOVA	1.85 (1,15)	0.194	0.355	0.11	0.00 (1,15)	0.987	0.987	0	3.76 (1,15)	0.0715	0.084	0.2
LPS-VNS	MCP-1	1	0.211	0.907	Two-Way ANOVA	0.11 (1,16)	0.747	0.747	0.007	2.63 (1,16)	0.125	0.237	0.141	0.85 (1,16)	0.369	0.51	0.051
LPS-VNS	MCP-1	2	0.977	0.825	Two-Way ANOVA	0.26 (1,15)	0.62	0.62	0.017	1.13 (1,15)	0.305	0.305	0.07	7.08 (1,15)	0.0178	0.0356	0.321
LPS-VNS	MCP-1	3	0.0684	0.0942	Two-Way ANOVA	0.01 (1,15)	0.932	0.932	0.001	0.07 (1,15)	0.792	0.792	0.005	0.24 (1,15)	0.629	0.629	0.016
LPS-VNS	MCP-3	1	0.333	0.746	Two-Way ANOVA	1.11 (1,16)	0.307	0.394	0.065	1.94 (1,16)	0.183	0.183	0.108	1.23 (1,16)	0.284	0.284	0.071
LPS-VNS	MCP-3	2	0.993	0.67	Two-Way ANOVA	1.66 (1,15)	0.218	0.218	0.099	1.65 (1,15)	0.218	0.218	0.099	6.06 (1,15)	0.0265	0.0457	0.288
LPS-VNS	MCP-3	3	0.0881	0.0194	ART ANOVA	3.07 (1,15)	0.1	0.2	0.17	0.70 (1,15)	0.416	0.416	0.045	4.62 (1,15)	0.0483	0.0483	0.236
LPS-VNS	MIP-1 alpha	1	0.0912	0.0111	ART ANOVA	2.59 (1,16)	0.127	0.254	0.139	0.07 (1,16)	0.788	0.788	0.005	0.04 (1,16)	0.853	0.853	0.002
LPS-VNS	MIP-1 alpha	2	0.232	0.738	Two-Way ANOVA	0.67 (1,15)	0.427	0.427	0.043	0.15 (1,15)	0.7	0.7	0.01	3.87 (1,15)	0.0679	0.0719	0.205
LPS-VNS	MIP-1 alpha	3	0.00179	0.816	Two-Way ANOVA (robust)	0.21 (1,15)	0.657	0.657	0.013	0.25 (1,15)	0.624	0.624	0.016	2.77 (1,15)	0.117	0.159	0.156
LPS-VNS	MIP-2 alpha	1	0.181	0.117	Two-Way ANOVA	0.39 (1,16)	0.542	0.542	0.024	0.24 (1,16)	0.632	0.632	0.015	0.50 (1,16)	0.49	0.503	0.03
LPS-VNS	MIP-2 alpha	2	0.646	0.208	Two-Way ANOVA	0.02 (1,15)	0.899	0.904	0.001	0.39 (1,15)	0.54	0.54	0.025	10.14 (1,15)	0.00615	0.0123	0.403
LPS-VNS	MIP-2 alpha	3	0.343	0.524	Two-Way ANOVA	4.47 (1,15)	0.0516	0.103	0.23	0.03 (1,15)	0.864	0.864	0.002	7.08 (1,15)	0.0178	0.0222	0.321
LPS-VNS	RANTES	1	0.0248	0.201	Two-Way ANOVA (robust)	1.06 (1,16)	0.318	0.636	0.062	0.38 (1,16)	0.548	0.748	0.023	1.46 (1,16)	0.244	0.244	0.084
LPS-VNS	RANTES	2	0.558	0.197	Two-Way ANOVA	2.06 (1,15)	0.172	0.172	0.121	0.07 (1,15)	0.794	0.794	0.005	3.87 (1,15)	0.0678	0.0764	0.205
LPS-VNS	RANTES	3	0.249	0.128	Two-Way ANOVA	0.95 (1,15)	0.345	0.483	0.059	0.40 (1,15)	0.539	0.539	0.026	2.30 (1,15)	0.15	0.15	0.133
LPS-VNS	TNF alpha	1	0.0667	0.403	Two-Way ANOVA	1.15 (1,16)	0.299	0.598	0.067	0.00 (1,16)	0.981	0.981	0	0.93 (1,16)	0.35	0.35	0.055
LPS-VNS	TNF alpha	2	0.681	0.212	Two-Way ANOVA	2.58 (1,15)	0.129	0.154	0.147	0.65 (1,15)	0.433	0.433	0.041	3.02 (1,15)	0.103	0.103	0.168
LPS-VNS	TNF alpha	3	0.0792	0.652	Two-Way ANOVA	2.38 (1,15)	0.144	0.288	0.137	0.67 (1,15)	0.425	0.425	0.043	5.42 (1,15)	0.0343	0.0343	0.265

## Sheet: Microglia
Animal	Sex	Group	Region	Sections	Extent	MG_Density	Multi_Nuclei_Density	Area	Perimeter	Solidity	Eccentricity	MajorAxisLength
LPS34	F	LPS	AM	LT2,RT,MB	0.173011	220.406	79.6358	5054.5	1087.1	0.300191	0.896619	199.038
LPS35	M	VNS	AM	MB2,RB,LB	0.153546	193.057	34.5893	5130	1229.63	0.259597	0.843844	213.868
LPS36	M	VNS	AM	LT2,RT,MB2	0.161755	222.015	65.961	5553	1343.14	0.265058	0.867823	213.749
LPS37	F	LPS	AM	LB2,RB,MB	0.169885	239.712	90.0931	5310.5	1113.72	0.297652	0.873998	214.42
LPS39	M	VNS	AM	LT,RB2,MB	0.152657	231.668	51.4817	5896	1380.44	0.245318	0.854979	217.592
LPS40	M	VNS	AM	MT,RT,LB2	0.171984	226.841	74.005	5387	1194.31	0.280901	0.868977	207.857
LPS41	F	LPS	AM	LT3,MT,RB	0.151555	204.318	68.3742	5586	1353.94	0.252793	0.857381	218.338
LPS42	F	VNS	AM	LB3,RT,MB	0.150711	190.643	42.6333	5359	1246.64	0.252117	0.851222	223.293
LPS43	M	CTRL	AM	RT,LB,MB2	0.128357	139.966	16.088	5318	1256.31	0.225443	0.867071	238.992
LPS44	M	LPS	AM	MT,RB3	0.136354	144.792	12.066	5237	1450.37	0.226442	0.846276	227.271
LPS45	F	LPS	AM	MT2,LB2,RB2	0.158653	210.417	69.8681	5647	1456.47	0.256525	0.861837	218.953
LPS46	F	CTRL	AM	MT,LT,RB2	0.1328	153.641	11.2616	5174.5	1257.15	0.231187	0.884924	223.317
LPS47	M	LPS	AM	MT,RT2,LT	0.157834	210.753	53.895	5687	1424.88	0.256813	0.844762	218.249
LPS48	M	CTRL	AM	RB,LT2,MT2	0.130378	180.186	26.5453	5407	1406.93	0.214578	0.848574	233.956
LPS49	F	CTRL	AM	LB2,RB,MB	0.14758	154.445	17.6969	4941	1106.62	0.24684	0.877723	207.061
LPS50	F	CTRL	AM	MB2,LT,LB2,RT2	0.144079	195.47	43.4377	6093.5	1542.4	0.227574	0.865148	245.111
LPS51	M	LPS	AM	LB3,MT,RT	0.14756	185.817	34.5893	5314.5	1282.18	0.248357	0.857639	219.413
LPS52	M	CTRL	AM	MB2,LT2,RT2	0.134617	145.423	6.49936	4637.5	1219.75	0.235029	0.885858	228.122
LPS53	F	CTRL	AM	RT,MT2,LT	0.143546	115.03	8.84843	5449.5	1231.25	0.242956	0.848629	229.095
LPS54	F	VNS	AM	MT,RT,RB2	0.160342	127.096	29.7629	5071	1244.2	0.266231	0.870475	212.695
LPS55	M	LPS	AM	RT,MT2,LT	0.165488	241.321	72.3962	5113	1252.4	0.277292	0.882034	203.543
LPS56	M	VNS	AM	LT2,LB2,RB,MB	0.173614	123.074	28.9585	5501	1342.55	0.278989	0.853703	195.073
LPS58	F	LPS	AM	LT,MT,RT2,RB2	0.151783	159.875	30.7684	4916	1231.53	0.252188	0.851989	205.916
LPS59	M	CTRL	AM	LT,RB3,MB	0.137567	143.184	24.1321	5380	1299.48	0.233729	0.860147	234.798
LPS60	M	VNS	AM	MT,LB2,LT2,RB2	0.155883	176.164	38.6113	5355	1295.42	0.25849	0.853936	208.674
LPS61	F	VNS	AM	RB,LT,MT3	0.14409	201.905	66.7654	5274	1227.7	0.237477	0.880215	225.956
LPS62	F	VNS	AM	RB,MT,LB2,LT2,RT2	0.168136	139.483	37.646	5430	1319.55	0.2767	0.869587	208.155
LPS34	F	LPS	DG	LT2,MT,RB	0.141144	127.55	31.6844	4656	1077.85	0.238001	0.879421	214.154
LPS35	M	VNS	DG	LT,RT2,RB	0.131227	155.25	33.7849	5580	1430.91	0.214005	0.859217	250.46
LPS36	M	VNS	DG	LT2,RT,MB	0.148978	157.663	57.1126	5268	1244.42	0.241506	0.876337	232.957
LPS37	F	LPS	DG	MT,LB2,RB2	0.141146	180.991	69.983	5173.5	1149.6	0.251168	0.887729	226.843
LPS39	M	VNS	DG	MB,MT2,LT,LB2,RB2	0.130441	97.0109	23.6494	5182	1333.21	0.223311	0.903541	245.045
LPS40	M	VNS	DG	MT,MB2,LB2,RT	0.145634	107.991	41.6278	5051	1097.89	0.246575	0.875579	206.748
LPS41	F	LPS	DG	LB3,MT,RB	0.133855	132.726	53.895	5751	1389.39	0.21825	0.867931	244.237
LPS42	F	VNS	DG	LT3,RT,MB	0.136319	89.2887	12.8704	5369	1250.6	0.236713	0.872412	227.011
LPS43	M	CTRL	DG	MB2,LB,RT	0.115258	86.8754	11.2616	4772.5	1241.06	0.187507	0.857582	241.769
LPS44	M	LPS	DG	LT2,MT,RB2	0.130898	75.6138	16.8924	4804	1278.01	0.218816	0.854082	241.179
LPS45	F	LPS	DG	MB2,RB,LB	0.139898	161.685	61.1346	5873.5	1429.09	0.236979	0.851853	248.185
LPS46	F	CTRL	DG	MT,LB2,RB	0.129983	80.4402	8.04402	4713	1288.66	0.221012	0.839009	223.195
LPS47	M	LPS	DG	MT,LB2,LT,RB2	0.125429	94.1151	22.9255	5111	1321.1	0.213803	0.8711	244.409
LPS48	M	CTRL	DG	LT,MB2,RB	0.121677	94.1151	8.04402	5925	1447.74	0.19707	0.875599	270.568
LPS49	F	CTRL	DG	LT2,RB,MB	0.13551	74.005	7.23962	4601.5	1169.86	0.244792	0.863266	229.104
LPS50	F	CTRL	DG	MB2,LT,LB2,RT2	0.115854	103.583	18.2794	5441	1514.31	0.188015	0.809314	249.04
LPS51	M	LPS	DG	RB,LT,MT3	0.137373	129.509	20.9145	5274	1280.83	0.228823	0.883221	243.757
LPS52	M	CTRL	DG	MB2,LT2,RT2	0.113666	44.6831	3.24968	5514	1504.26	0.200399	0.866245	272.514
LPS53	F	CTRL	DG	LB,MT2,LT2,RB2	0.115963	103.583	14.6236	5259	1438.78	0.197309	0.840496	247.366
LPS54	F	VNS	DG	LT,RT2,MB	0.133805	102.963	28.1541	5091	1196.83	0.224443	0.844684	225.348
LPS55	M	LPS	DG	LT,MB2,RB	0.120858	115.834	37.0025	4753	1206.75	0.220478	0.877594	242.052
LPS56	M	VNS	DG	MT,LB2,RB	0.13772	133.531	42.6333	5301.5	1289.31	0.237359	0.866455	233.786
LPS58	F	LPS	DG	LT,RB2,MB	0.130311	119.052	26.5453	5076	1291.92	0.221242	0.860751	248.349
LPS59	M	CTRL	DG	LT,RB3,MB	0.127013	104.572	18.5013	5116	1279.69	0.205515	0.892866	248.205
LPS60	M	VNS	DG	MT,LB2,LT,RB2	0.130578	127.9	34.3882	5596	1357.76	0.218439	0.87607	253.364
LPS61	F	VNS	DG	RB,LT,MT3	0.140667	111.812	48.2641	5821	1380.8	0.225324	0.838569	248.424
LPS62	F	VNS	DG	MT,LB2,RB,MB2	0.137802	101.958	19.3057	5290	1310.84	0.227037	0.851404	221.906
LPS34	F	LPS	HT	XB,MT2,RT2,LB	0.198235	225.151	68.1708	4807	1050.18	0.325092	0.881866	181.852
LPS35	M	VNS	HT	LT,MB2,RB	0.174412	231.38	71.2582	5272	1194.01	0.284001	0.844348	200.245
LPS36	M	VNS	HT	RT,LB2,MB	0.169211	307.895	91.9348	4864	1141.85	0.27703	0.847911	198.865
LPS37	F	LPS	HT	LT2,MT,RB	0.17478	261.821	91.7636	5234	1107.43	0.287402	0.87191	211.569
LPS39	M	VNS	HT	RB2,LT,MB	0.160575	246.965	102.338	5363	1184.68	0.266148	0.878869	225.083
LPS40	M	VNS	HT	LT2,MT,LB2,RT	0.173641	253.364	75.3758	5044.5	1131.07	0.279022	0.86435	199.278
LPS41	F	LPS	HT	LT3,LB3,MT,RB	0.156448	200.113	83.2214	5346	1231.43	0.257576	0.87873	220.525
LPS42	F	VNS	HT	MT2,RT,LB3,MB3	0.154144	187.217	58.4269	5826	1311.73	0.261828	0.860764	225.141
LPS43	M	CTRL	HT	MB2,LB,RT	0.139248	137.689	17.8486	4809	1208.82	0.233757	0.893431	239.018
LPS44	M	LPS	HT	MT,LB2,RB2	0.156793	170.587	53.2563	4982	1183.56	0.261206	0.869944	216.866
LPS45	F	LPS	HT	MB2,RB,LB	0.172179	264.602	82.5201	5360	1233.53	0.275585	0.855122	205.134
LPS46	F	CTRL	HT	LB,RT2,MB	0.136698	138.161	8.63503	4612.5	1162.23	0.221809	0.886685	241.305
LPS47	M	LPS	HT	LT,MT,RT2	0.164971	218.067	47.0341	4674	1098.4	0.278017	0.857473	198.525
LPS48	M	CTRL	HT	RB,MB2,LT	0.144286	126.43	13.5764	4835	1146.35	0.241672	0.861214	217.822
LPS49	F	CTRL	HT	LB2,RB,MB	0.146764	143.648	19.3211	4490.5	1074.56	0.238039	0.873851	203.316
LPS50	F	CTRL	HT	MB2,LT,LB2,RT2	0.144444	149.648	25.2571	4864	1189.41	0.241119	0.825819	206.987
LPS51	M	LPS	HT	LT,RB,MT3	0.139779	190.653	40.9737	5185	1196.08	0.238375	0.875715	231.102
LPS52	M	CTRL	HT	MB2,MT,LT2,RB2	0.127343	105.365	10.7258	4176	1137	0.223678	0.860052	222.321
LPS53	F	CTRL	HT	LT,MT2,RB	0.137581	164.418	21.0793	4851	1253.18	0.226392	0.862401	223.091
LPS54	F	VNS	HT	LT2,MT,RB	0.18494	228.037	69.4025	5188	1141.12	0.30486	0.859654	190.628
LPS55	M	LPS	HT	RB,MT2,LT	0.167984	235.69	57.917	4404	974.682	0.282665	0.889539	197.716
LPS56	M	VNS	HT	LT2,RB,MB	0.168532	186.514	45.1104	4586	1112.07	0.270896	0.844634	194.569
LPS58	F	LPS	HT	MT,LT	0.182207	183.928	48.876	5389.5	1171.21	0.297502	0.854994	208.019
LPS59	M	CTRL	HT	LT,MB,RT3	0.144279	126.017	9.88367	4830.5	1197.99	0.247447	0.874229	219.158
LPS60	M	VNS	HT	LT2,RT2,MB	0.167513	187.477	40.5356	5027.5	1166.28	0.282244	0.870165	198.832
LPS61	F	VNS	HT	RB,LT,MB3	0.162203	231.339	60.7473	5110	1168.5	0.267354	0.856968	211.356
LPS62	F	VNS	HT	LT2,MT,RB	0.175421	244.754	102.26	5749	1275.26	0.285906	0.842316	201.164
LPS34	F	LPS	CX	RT,LB2,RB,MB	0.186912	112.723	34.7309	4635	996.52	0.312522	0.885711	189.872
LPS35	M	VNS	CX	RB,MB2,LT	0.14735	109.399	18.5013	5172	1240	0.249269	0.890815	212.785
LPS36	M	VNS	CX	RT,LB2,MB2	0.178979	165.707	37.0025	5311	1203.52	0.289729	0.86701	200.794
LPS37	F	LPS	CX	LB2,MB	0.164838	191.85	67.5698	5017	1100.24	0.278132	0.885187	205.848
LPS39	M	VNS	CX	MT2,LB2,RB2	0.147264	132.424	13.8111	4849	1167.26	0.250224	0.874546	213.486
LPS40	M	VNS	CX	MT,LB2,RB	0.161329	123.074	45.0465	5376.5	1247.47	0.276363	0.860394	204.841
LPS41	F	LPS	CX	LT3,MT,RB	0.145348	133.531	45.8509	5454	1265.77	0.239503	0.858688	218.103
LPS42	F	VNS	CX	LT3,RT,MB	0.130848	103.768	12.8704	5210	1308.33	0.220954	0.87526	239.011
LPS43	M	CTRL	CX	RT,MT2,LB	0.120904	96.5283	8.04402	5058	1296.68	0.218818	0.889455	249.343
LPS44	M	LPS	CX	RB,MT,LB2,RT2	0.139555	97.1316	11.4627	5682	1404.86	0.240589	0.856288	225.78
LPS45	F	LPS	CX	MB2,RT2,RB,LB	0.166362	187.024	50.074	5291	1305.05	0.268716	0.857238	209.311
LPS46	F	CTRL	CX	RT,MT2,LB	0.13883	114.225	11.2616	4721	1188.97	0.244057	0.860326	225.951
LPS47	M	LPS	CX	MT,LT,RB2	0.159941	136.748	33.7849	5152	1297.25	0.25382	0.816448	201.887
LPS48	M	CTRL	CX	LT,MB2,MT2,RB	0.153293	142.379	13.2726	4271.5	964.061	0.270731	0.893549	199.256
LPS49	F	CTRL	CX	LT2,MT,RT	0.151173	93.3107	4.82641	4374	977.614	0.250088	0.887814	206.506
LPS50	F	CTRL	CX	MT2,LT2,RT2,MB	0.153427	126.693	4.82641	4219.5	947.489	0.274195	0.919625	216.858
LPS51	M	LPS	CX	LT3,MT,RB	0.157836	115.03	12.8704	4585	1107.31	0.24812	0.853744	199.479
LPS52	M	CTRL	CX	MB2,LB2,RT2	0.131171	90.991	6.49936	4760	1215.19	0.233364	0.869546	232.744
LPS53	F	CTRL	CX	LT2,RT,MT2,RB	0.130074	128.503	12.6693	5268	1354.3	0.205791	0.865523	240.623
LPS54	F	VNS	CX	MT,LT,RB2	0.173562	101.355	28.1541	4508	1039.38	0.272137	0.856868	191.142
LPS55	M	LPS	CX	RT,MT2,LT	0.186389	158.467	47.4597	4413	956.828	0.291587	0.869455	182.368
LPS56	M	VNS	CX	RT,LT	0.21183	150.825	16.8924	4261	807.933	0.354422	0.908946	173.542
LPS58	F	LPS	CX	MT2,RB,LB	0.166602	119.856	15.2836	4900	1125.38	0.272722	0.868435	195.19
LPS59	M	CTRL	CX	LT,MB,RT3	0.141598	125.487	3.21761	4198	1004.63	0.251134	0.915703	221.828
LPS60	M	VNS	CX	MT,LB2,LT,RB2	0.153186	94.7184	11.4627	4975	1270.01	0.245277	0.892957	213.956
LPS61	F	VNS	CX	RB,LT,MT3	0.193668	152.032	39.4157	4273	882.407	0.34184	0.903803	186.736
LPS62	F	VNS	CX	MB2,LB2,RB,RT	0.16037	84.4622	14.4792	4758	1044.17	0.270013	0.85945	191.786

## Sheet: Microglia Statistical Analysis
Summary Stats								Statistical Analysis
Measure	Full Region	Sex	Group	N	Mean	Std		Compare	Measure	Region	Levene_p	Shapiro_p	Method	Interaction_F(df)	Interaction_p	Interaction_q	Interaction_eta2p	Group_F(df)	Group_p	Group_q	Group_eta2p	Sex_F(df)	Sex_p	Sex_q	Sex_eta2p	t-test Male_p	t-test Female_p
Extent	AM	All	CTRL	8	0.137	0.007		CTRL-LPS	Extent	AM	0.198022	0.905973	Two-Way ANOVA	0.00 (1,13)	0.990814	0.990814	1.05957e-05	18.74 (1,13)	0.000817586	0.00327035	0.590467	4.40 (1,13)	0.0560354	0.190638	0.252907
Extent	AM	All	LPS	9	0.157	0.012		CTRL-LPS	Extent	CX	0.941582	0.76283	Two-Way ANOVA	0.01 (1,13)	0.916993	0.990814	0.000867904	10.27 (1,13)	0.00689485	0.0141882	0.441459	0.64 (1,13)	0.436908	0.582544	0.0471567
Extent	AM	All	VNS	10	0.159	0.01		CTRL-LPS	Extent	HT	0.58967	0.611361	Two-Way ANOVA	2.31 (1,13)	0.152694	0.307368	0.150741	23.82 (1,13)	0.000300474	0.00240379	0.646903	3.94 (1,13)	0.0685398	0.190638	0.232769
Extent	CX	All	CTRL	8	0.14	0.012		CTRL-LPS	Extent	DG	0.228458	0.198277	Two-Way ANOVA	0.28 (1,13)	0.602748	0.964397	0.0214182	10.18 (1,13)	0.00709411	0.0141882	0.439178	3.80 (1,13)	0.073067	0.190638	0.226319
Extent	CX	All	LPS	9	0.164	0.016		CTRL-LPS	MG_Density	AM	0.614388	0.459412	Two-Way ANOVA	0.08 (1,13)	0.777508	0.888581	0.00636202	9.82 (1,13)	0.00791616	0.0211098	0.430326	0.20 (1,13)	0.660645	0.867452	0.0152882
Extent	CX	All	VNS	10	0.166	0.024		CTRL-LPS	MG_Density	CX	0.498569	0.252984	Two-Way ANOVA	0.54 (1,13)	0.473574	0.631432	0.0402205	2.83 (1,13)	0.116312	0.232624	0.178824	0.76 (1,13)	0.399261	0.867452	0.0552058
Extent	DG	All	CTRL	8	0.122	0.008		CTRL-LPS	MG_Density	HT	0.0618147	0.861689	Two-Way ANOVA	0.00 (1,13)	0.946456	0.946456	0.000360465	39.58 (1,13)	2.78154e-05	0.000222523	0.752776	3.72 (1,13)	0.0757678	0.303071	0.222649
Extent	DG	All	LPS	9	0.133	0.007		CTRL-LPS	MG_Density	DG	0.935	0.648841	Two-Way ANOVA	2.05 (1,13)	0.175913	0.469101	0.136151	10.78 (1,13)	0.00594079	0.0211098	0.453252	4.48 (1,13)	0.054212	0.303071	0.256188
Extent	DG	All	VNS	10	0.137	0.006		CTRL-LPS	Multi_Nuclei_Density	AM	0.51479	0.706323	Two-Way ANOVA	1.38 (1,13)	0.261038	0.28835	0.0960173	14.26 (1,13)	0.00230962	0.00461925	0.5231	1.91 (1,13)	0.189868	0.356676	0.128308
Extent	HT	All	CTRL	8	0.14	0.006		CTRL-LPS	Multi_Nuclei_Density	CX	0.0938624	0.707729	Two-Way ANOVA	1.34 (1,13)	0.267798	0.28835	0.0934681	15.30 (1,13)	0.00178679	0.00461925	0.540637	1.57 (1,13)	0.232646	0.356676	0.107595
Extent	HT	All	LPS	9	0.168	0.017		CTRL-LPS	Multi_Nuclei_Density	HT	0.418465	0.250786	Two-Way ANOVA	3.52 (1,13)	0.0833252	0.222201	0.212998	79.83 (1,13)	6.53958e-07	5.23166e-06	0.859953	8.66 (1,13)	0.0114139	0.0913115	0.399928
Extent	HT	All	VNS	10	0.169	0.009		CTRL-LPS	Multi_Nuclei_Density	DG	0.139851	0.967935	Two-Way ANOVA	3.72 (1,13)	0.0759553	0.222201	0.222398	19.05 (1,13)	0.000766616	0.00306646	0.594337	4.99 (1,13)	0.0436237	0.174495	0.277527
MG_Density	AM	All	CTRL	8	153.418	24.812		LPS-VNS	Extent	AM	0.912295	0.0819749	Two-Way ANOVA	2.34 (1,15)	0.147116	0.307368	0.134816	0.22 (1,15)	0.643746	0.823812	0.0146326	0.12 (1,15)	0.731304	0.835776	0.00809428
MG_Density	AM	All	LPS	9	201.935	33.108		LPS-VNS	Extent	CX	0.71922	0.600947	Two-Way ANOVA	0.12 (1,15)	0.731899	0.975865	0.00805722	0.04 (1,15)	0.835062	0.835062	0.00298362	0.02 (1,15)	0.883689	0.883689	0.00147403
MG_Density	AM	All	VNS	10	183.195	40.806		LPS-VNS	Extent	HT	0.309221	0.918686	Two-Way ANOVA	3.04 (1,15)	0.101534	0.307368	0.168653	0.13 (1,15)	0.720836	0.823812	0.0087624	3.17 (1,15)	0.0953188	0.190638	0.174408
MG_Density	CX	All	CTRL	8	114.765	19.149		LPS-VNS	Extent	DG	0.306621	0.272895	Two-Way ANOVA	2.26 (1,15)	0.153684	0.307368	0.130838	2.14 (1,15)	0.164586	0.263337	0.124607	1.98 (1,15)	0.179601	0.287362	0.116694
MG_Density	CX	All	LPS	9	139.151	33.35		LPS-VNS	MG_Density	AM	0.762114	0.23979	Two-Way ANOVA	1.44 (1,15)	0.249266	0.486721	0.087409	1.46 (1,15)	0.244958	0.326611	0.0889429	0.31 (1,15)	0.587394	0.867452	0.020088
MG_Density	CX	All	VNS	10	121.776	27.534		LPS-VNS	MG_Density	CX	0.802004	0.0585002	Two-Way ANOVA	2.12 (1,15)	0.165614	0.469101	0.124042	1.64 (1,15)	0.220267	0.326611	0.0983578	0.01 (1,15)	0.911205	0.911205	0.0008568
MG_Density	DG	All	CTRL	8	86.482	20.389		LPS-VNS	MG_Density	HT	0.559567	0.566441	Two-Way ANOVA	1.13 (1,15)	0.3042	0.486721	0.0701647	0.66 (1,15)	0.429756	0.437289	0.042058	0.10 (1,15)	0.759021	0.867452	0.0064651
MG_Density	DG	All	LPS	9	126.342	31.748		LPS-VNS	MG_Density	DG	0.427863	0.696305	Two-Way ANOVA	10.78 (1,15)	0.00502046	0.0401637	0.418266									0.133048	0.0170679
MG_Density	DG	All	VNS	10	118.537	24		LPS-VNS	Multi_Nuclei_Density	AM	0.754298	0.753551	Two-Way ANOVA	2.30 (1,15)	0.149784	0.28835	0.133179	0.86 (1,15)	0.368842	0.421533	0.0541319	1.05 (1,15)	0.320815	0.356676	0.0656651
MG_Density	HT	All	CTRL	8	136.422	17.68		LPS-VNS	Multi_Nuclei_Density	CX	0.852282	0.370411	Two-Way ANOVA	1.21 (1,15)	0.28835	0.28835	0.0747414	2.11 (1,15)	0.167182	0.267492	0.123186	1.20 (1,15)	0.291552	0.356676	0.0737931
MG_Density	HT	All	LPS	9	216.735	33.389		LPS-VNS	Multi_Nuclei_Density	HT	0.494936	0.809842	Two-Way ANOVA	1.72 (1,15)	0.209826	0.28835	0.102695	1.13 (1,15)	0.30382	0.405093	0.0702714	2.22 (1,15)	0.156801	0.356676	0.129011
MG_Density	HT	All	VNS	10	230.494	37.496		LPS-VNS	Multi_Nuclei_Density	DG	0.452281	0.633567	Two-Way ANOVA	7.48 (1,15)	0.0153627	0.122902	0.332638	0.29 (1,15)	0.598592	0.598592	0.0189184	0.90 (1,15)	0.356676	0.356676	0.0568652
Multi_Nuclei_Density	AM	All	CTRL	8	19.314	12.006
Multi_Nuclei_Density	AM	All	LPS	9	56.854	25.88
Multi_Nuclei_Density	AM	All	VNS	10	47.041	16.51
Multi_Nuclei_Density	CX	All	CTRL	8	8.077	3.882
Multi_Nuclei_Density	CX	All	LPS	9	35.454	19.343
Multi_Nuclei_Density	CX	All	VNS	10	23.764	12.573
Multi_Nuclei_Density	DG	All	CTRL	8	11.155	5.528
Multi_Nuclei_Density	DG	All	LPS	9	37.886	19.195
Multi_Nuclei_Density	DG	All	VNS	10	34.179	13.638
Multi_Nuclei_Density	HT	All	CTRL	8	15.791	5.987
Multi_Nuclei_Density	HT	All	LPS	9	63.748	18.369
Multi_Nuclei_Density	HT	All	VNS	10	71.739	21.796
Extent	AM	M	CTRL	4	0.133	0.004
Extent	AM	M	LPS	4	0.152	0.013
Extent	AM	M	VNS	6	0.162	0.009
Extent	AM	F	CTRL	4	0.142	0.006
Extent	AM	F	LPS	5	0.161	0.01
Extent	AM	F	VNS	4	0.156	0.011
Extent	CX	M	CTRL	4	0.137	0.014
Extent	CX	M	LPS	4	0.161	0.019
Extent	CX	M	VNS	6	0.167	0.025
Extent	CX	F	CTRL	4	0.143	0.011
Extent	CX	F	LPS	5	0.166	0.015
Extent	CX	F	VNS	4	0.165	0.026
Extent	DG	M	CTRL	4	0.119	0.006
Extent	DG	M	LPS	4	0.129	0.007
Extent	DG	M	VNS	6	0.137	0.008
Extent	DG	F	CTRL	4	0.124	0.01
Extent	DG	F	LPS	5	0.137	0.005
Extent	DG	F	VNS	4	0.137	0.003
Extent	HT	M	CTRL	4	0.139	0.008
Extent	HT	M	LPS	4	0.157	0.013
Extent	HT	M	VNS	6	0.169	0.005
Extent	HT	F	CTRL	4	0.141	0.005
Extent	HT	F	LPS	5	0.177	0.015
Extent	HT	F	VNS	4	0.169	0.014
MG_Density	AM	M	CTRL	4	152.19	18.798
MG_Density	AM	M	LPS	4	195.671	40.813
MG_Density	AM	M	VNS	6	195.47	41.518
MG_Density	AM	F	CTRL	4	154.646	32.849
MG_Density	AM	F	LPS	5	206.946	29.536
MG_Density	AM	F	VNS	4	164.782	37.001
MG_Density	CX	M	CTRL	4	113.846	24.303
MG_Density	CX	M	LPS	4	126.844	26.587
MG_Density	CX	M	VNS	6	129.358	26.189
MG_Density	CX	F	CTRL	4	115.683	16.209
MG_Density	CX	F	LPS	5	148.997	37.705
MG_Density	CX	F	VNS	4	110.404	29.051
MG_Density	DG	M	CTRL	4	82.561	26.276
MG_Density	DG	M	LPS	4	103.768	23.763
MG_Density	DG	M	VNS	6	129.891	24.463
MG_Density	DG	F	CTRL	4	90.403	15.445
MG_Density	DG	F	LPS	5	144.401	25.983
MG_Density	DG	F	VNS	4	101.506	9.27
MG_Density	HT	M	CTRL	4	123.875	13.473
MG_Density	HT	M	LPS	4	203.749	28.847
MG_Density	HT	M	VNS	6	235.599	45.638
MG_Density	HT	F	CTRL	4	148.969	11.318
MG_Density	HT	F	LPS	5	227.123	36.083
MG_Density	HT	F	VNS	4	222.837	24.822
Multi_Nuclei_Density	AM	M	CTRL	4	18.316	9.058
Multi_Nuclei_Density	AM	M	LPS	4	43.237	25.886
Multi_Nuclei_Density	AM	M	VNS	6	48.934	18.09
Multi_Nuclei_Density	AM	F	CTRL	4	20.311	15.864
Multi_Nuclei_Density	AM	F	LPS	5	67.748	22.433
Multi_Nuclei_Density	AM	F	VNS	4	44.202	15.948
Multi_Nuclei_Density	CX	M	CTRL	4	7.758	4.191
Multi_Nuclei_Density	CX	M	LPS	4	26.394	17.361
Multi_Nuclei_Density	CX	M	VNS	6	23.786	13.809
Multi_Nuclei_Density	CX	F	CTRL	4	8.396	4.162
Multi_Nuclei_Density	CX	F	LPS	5	42.702	19.352
Multi_Nuclei_Density	CX	F	VNS	4	23.73	12.505
Multi_Nuclei_Density	DG	M	CTRL	4	10.264	6.403
Multi_Nuclei_Density	DG	M	LPS	4	24.434	8.747
Multi_Nuclei_Density	DG	M	VNS	6	38.866	11.244
Multi_Nuclei_Density	DG	F	CTRL	4	12.047	5.311
Multi_Nuclei_Density	DG	F	LPS	5	48.648	18.808
Multi_Nuclei_Density	DG	F	VNS	4	27.149	15.408
Multi_Nuclei_Density	HT	M	CTRL	4	13.009	3.593
Multi_Nuclei_Density	HT	M	LPS	4	49.795	7.38
Multi_Nuclei_Density	HT	M	VNS	6	71.092	24.649
Multi_Nuclei_Density	HT	F	CTRL	4	18.573	7.078
Multi_Nuclei_Density	HT	F	LPS	5	74.91	16.839
Multi_Nuclei_Density	HT	F	VNS	4	72.709	20.259

[truncated: 3 more sheets: Western blots, Western Blot Stats, Weights]
