# Supplementary material for: Vagus nerve stimulation modulates LPS-induced epileptogenicity: the role of inflammation suppression
Source: Research Square preprint supplement (doi:10.21203/rs.3.rs-8896240/v1), 2026-04-20
Supplement: Supplementary file 2 [file a69f3d51332d70b975b7c03e.xlsx]

## Sheet: cortex_hallmark
pathway	pval	padj	log2err	NES	size
Adipogenesis	0.0665962	0.16649	0.176694	1.33656	189
Allograft Rejection	4.57047e-15	2.28524e-13	0.996986	2.31195	125
Apical Junction	0.00369167	0.0167803	0.431708	1.61703	176
Apoptosis	0.0245632	0.0877256	0.352488	1.5194	142
Coagulation	6.02166e-08	5.01805e-07	0.704976	2.14849	90
Complement	1.68083e-10	2.10104e-09	0.826657	2.1723	145
Epithelial Mesenchymal Transition	0.0565032	0.148693	0.193813	1.36159	176
Hypoxia	0.0330138	0.110046	0.257206	1.41876	178
Il2 Stat5 Signaling	4.01302e-05	0.000200651	0.557332	1.88487	166
Il6 Jak Stat3 Signaling	8.84436e-11	1.47406e-09	0.839089	2.23087	66
Inflammatory Response	1.21884e-13	3.0471e-12	0.943632	2.26765	153
Interferon Alpha Response	0.00630592	0.0262746	0.407018	1.71259	82
Interferon Gamma Response	2.0822e-07	1.48729e-06	0.690132	2.0393	154
Kras Signaling Up	4.11628e-06	2.28682e-05	0.610527	1.92056	174
Oxidative Phosphorylation	1.489e-09	1.489e-08	0.788187	-2.21799	184
P53 Pathway	0.0382979	0.119681	0.237794	1.3995	177
Pancreas Beta Cells	0.0225388	0.0866879	0.352488	-1.5549	23
Pi3k Akt Mtor Signaling	0.0752315	0.179123	0.173748	1.36727	92
Tgf Beta Signaling	0.0490956	0.136377	0.231127	1.44902	51
Tnfa Signaling Via Nfkb	2.93364e-06	1.83352e-05	0.627257	1.94465	168
Xenobiotic Metabolism	0.04814	0.136377	0.213928	1.38341	146

## Sheet: cortex_go
pathway	pval	padj	log2err	NES	size	GO_ID	GO_Domain
Actin Filament Bundle Organization	0.0171505	0.125311	0.352488	1.48684	166	GO:0061572	BP
Actin Filament Organization	0.000367415	0.00829925	0.498493	1.55543	407	GO:0007015	BP
Actin Polymerization Or Depolymerization	0.00914185	0.0850712	0.38073	1.57581	172	GO:0008154	BP
Activated T Cell Proliferation	0.00555104	0.0596715	0.407018	1.69569	34	GO:0050798	BP
Activation Of Gtpase Activity	0.0266411	0.166948	0.352488	1.50666	42	GO:0090630	BP
Activation Of Immune Response	1.62383e-20	1.60341e-17	1.16907	2.13894	406	GO:0002253	BP
Activation Of Innate Immune Response	5.10927e-08	3.92392e-06	0.719513	1.90904	253	GO:0002218	BP
Acute Inflammatory Response	1.20341e-11	1.93441e-09	0.875325	2.24895	65	GO:0002526	BP
Acute Inflammatory Response To Antigenic Stimulus	1.37442e-06	7.66128e-05	0.643552	1.95389	19	GO:0002438	BP
Acute Phase Response	2.17664e-06	0.000113977	0.627257	2.02105	25	GO:0006953	BP
Acyl Coa Metabolic Process	0.0065893	0.0672751	0.407018	-1.58962	85	GO:0006637	BP
Adaptive Immune Response	1.85349e-26	4.27044e-23	1.3345	2.3135	291	GO:0002250	BP
Adaptive Immune Response Based On Somatic Recombination Of Immune Receptors Built From Immunoglobulin Superfamily Domains	3.15221e-20	2.4209e-17	1.16018	2.29624	225	GO:0002460	BP
Adenosine Metabolic Process	0.0131318	0.107799	0.38073	1.63134	10	GO:0046085	BP
Adenylate Cyclase Inhibiting G Protein Coupled Glutamate Receptor Signaling Pathway	0.00111272	0.0195207	0.45506	-1.85404	7	GO:0007196	BP
Adenylate Cyclase Inhibiting Serotonin Receptor Signaling Pathway	0.0110479	0.0955734	0.38073	-1.69365	8	GO:0007198	BP
Adult Behavior	0.00139761	0.0230776	0.45506	-1.58467	164	GO:0030534	BP
Adult Locomotory Behavior	0.00827183	0.0792994	0.38073	-1.59083	98	GO:0008344	BP
Aerobic Electron Transport Chain	0.000507878	0.0108683	0.477271	-1.8626	52	GO:0019646	BP
Aerobic Respiration	0.000162893	0.00421692	0.518848	-1.70287	158	GO:0009060	BP
Aim2 Inflammasome Complex Assembly	0.00839682	0.0801641	0.38073	1.57602	5	GO:0140970	BP
Allantoin Metabolic Process	0.0211495	0.144167	0.352488	1.59613	8	GO:0000255	BP
Alpha Beta T Cell Activation	5.78107e-09	5.12292e-07	0.761461	2.11063	143	GO:0046631	BP
Alpha Beta T Cell Differentiation	3.56766e-05	0.0012777	0.557332	1.93241	106	GO:0046632	BP
Alpha Beta T Cell Proliferation	0.00218554	0.0315268	0.431708	1.85085	35	GO:0046633	BP
Ameboidal Type Cell Migration	0.00877765	0.0825457	0.38073	1.48012	235	GO:0001667	BP
Amide Biosynthetic Process	0.00179672	0.0273468	0.45506	-1.54171	143	GO:0043604	BP
Amyloid Beta Clearance	0.00217769	0.0314899	0.431708	1.89758	32	GO:0097242	BP
Anatomical Structure Maturation	0.00614504	0.0641609	0.407018	1.49187	241	GO:0071695	BP
Angiogenesis	9.06981e-10	9.49857e-08	0.801216	1.79475	490	GO:0001525	BP
Animal Organ Regeneration	0.00265546	0.0362022	0.431708	1.75838	53	GO:0031100	BP
Anoikis	0.0220074	0.148086	0.352488	1.55629	29	GO:0043276	BP
Anterograde Dendritic Transport	0.0218248	0.147461	0.352488	-1.66774	11	GO:0098937	BP
Antifungal Innate Immune Response	0.00165123	0.0257636	0.45506	1.76471	12	GO:0061760	BP
Antigen Processing And Presentation	0.00180017	0.0273468	0.45506	1.85837	71	GO:0019882	BP
Antigen Processing And Presentation Of Exogenous Antigen	0.000448135	0.00986469	0.498493	1.80508	21	GO:0019884	BP
Antigen Processing And Presentation Of Exogenous Peptide Antigen	0.00292657	0.0384572	0.431708	1.77746	16	GO:0002478	BP
Antigen Processing And Presentation Of Exogenous Peptide Antigen Via Mhc Class I	0.00837411	0.0800579	0.38073	1.65207	7	GO:0042590	BP
Antigen Processing And Presentation Of Exogenous Peptide Antigen Via Mhc Class Ii	0.00268235	0.0364502	0.431708	1.6949	11	GO:0019886	BP
Antigen Processing And Presentation Of Peptide Antigen	0.0106413	0.0936974	0.38073	1.72631	30	GO:0048002	BP
Antigen Processing And Presentation Of Peptide Or Polysaccharide Antigen Via Mhc Class Ii	0.00614165	0.0641609	0.407018	1.70832	17	GO:0002504	BP
Antigen Receptor Mediated Signaling Pathway	6.77268e-06	0.00031418	0.610527	1.95358	125	GO:0050851	BP
Antimicrobial Humoral Immune Response Mediated By Antimicrobial Peptide	0.0203339	0.140815	0.352488	1.67344	31	GO:0061844	BP
Antimicrobial Humoral Response	0.00116489	0.0200003	0.45506	1.77986	42	GO:0019730	BP
Apoptotic Cell Clearance	0.00044977	0.00986924	0.498493	1.98148	32	GO:0043277	BP
Apoptotic Process Involved In Heart Morphogenesis	0.0242012	0.156335	0.352488	-1.53578	5	GO:0003278	BP
Arachidonate Secretion	0.0306394	0.182254	0.352488	1.57615	22	GO:0050482	BP
Astrocyte Activation	1.81456e-05	0.000724984	0.57561	1.91165	19	GO:0048143	BP
Astrocyte Development	0.00025629	0.00625963	0.498493	1.84657	36	GO:0014002	BP
Astrocyte Differentiation	0.00519223	0.0573124	0.407018	1.66273	88	GO:0048708	BP
Atp Synthesis Coupled Electron Transport	0.000488375	0.010582	0.477271	-1.86925	62	GO:0042773	BP
Autocrine Signaling	0.00345498	0.0435781	0.431708	1.68839	7	GO:0035425	BP
Autophagosome Membrane Docking	0.0307088	0.182353	0.352488	-1.59553	8	GO:0016240	BP
Axo Dendritic Transport	0.000572175	0.0120944	0.477271	-1.78012	90	GO:0008088	BP
Axonal Fasciculation	0.0340438	0.195603	0.321776	-1.52971	26	GO:0007413	BP
B Cell Activation	8.82091e-11	1.15256e-08	0.839089	2.09077	214	GO:0042113	BP
B Cell Activation Involved In Immune Response	8.37212e-05	0.0025834	0.538434	1.9392	70	GO:0002312	BP
B Cell Apoptotic Process	0.0250956	0.160463	0.352488	1.59022	25	GO:0001783	BP
B Cell Chemotaxis	0.00569497	0.0606132	0.407018	1.67039	6	GO:0035754	BP
B Cell Differentiation	1.94965e-06	0.000103661	0.627257	2.01661	117	GO:0030183	BP
B Cell Homeostasis	0.00646588	0.0667047	0.407018	1.80138	39	GO:0001782	BP
B Cell Mediated Immunity	1.84613e-11	2.77401e-09	0.863415	2.24177	85	GO:0019724	BP
B Cell Proliferation	2.32459e-06	0.000119907	0.627257	2.08902	69	GO:0042100	BP
B Cell Receptor Signaling Pathway	4.54331e-06	0.000222719	0.610527	2.03683	46	GO:0050853	BP
Biological Process Involved In Interaction With Host	0.0156525	0.119812	0.352488	1.6217	98	GO:0051701	BP
Biological Process Involved In Interaction With Symbiont	0.00451881	0.0523182	0.407018	1.68817	15	GO:0051702	BP
Biological Process Involved In Symbiotic Interaction	0.00153208	0.0244566	0.45506	1.7815	115	GO:0044403	BP
Bone Development	0.0261506	0.16477	0.287857	1.41519	203	GO:0060348	BP
Bone Marrow Development	0.0305259	0.181736	0.352488	1.57371	8	GO:0048539	BP
Bone Remodeling	0.00471286	0.0537546	0.407018	1.69805	84	GO:0046849	BP
Bone Resorption	0.00255655	0.035131	0.431708	1.80738	61	GO:0045453	BP
Calcium Ion Homeostasis	0.0267765	0.167493	0.282013	1.39141	285	GO:0055074	BP
Calcium Ion Transmembrane Import Into Cytosol	0.0011591	0.0199793	0.45506	1.70568	159	GO:0097553	BP
Calcium Ion Transmembrane Transport	0.000506708	0.0108683	0.477271	1.60395	277	GO:0070588	BP
Calcium Ion Transport	0.000135202	0.00371856	0.518848	1.62759	363	GO:0006816	BP
Calcium Mediated Signaling	0.0013776	0.0228894	0.45506	1.70463	179	GO:0019722	BP
Canonical Nf Kappab Signal Transduction	4.6561e-07	2.89937e-05	0.674963	1.89354	238	GO:0007249	BP
Carbohydrate Transport	0.00108331	0.0191996	0.45506	1.81575	107	GO:0008643	BP
Cd4 Positive Alpha Beta T Cell Activation	3.18762e-05	0.00115962	0.557332	1.98591	93	GO:0035710	BP
Cd4 Positive Alpha Beta T Cell Cytokine Production	0.00316672	0.0409356	0.431708	1.80546	18	GO:0035743	BP
Cd4 Positive Alpha Beta T Cell Differentiation	4.29829e-05	0.00147078	0.557332	1.97459	74	GO:0043367	BP
Cd8 Positive Alpha Beta T Cell Activation	0.00641496	0.0663776	0.407018	1.73215	23	GO:0036037	BP
Cell Activation Involved In Immune Response	2.42516e-20	2.09533e-17	1.16907	2.27735	226	GO:0002263	BP
Cell Adhesion Mediated By Integrin	2.3737e-06	0.000120949	0.627257	2.07652	75	GO:0033627	BP
Cell Cell Adhesion Mediated By Integrin	0.00445045	0.0518471	0.407018	1.74496	16	GO:0033631	BP
Cell Cell Junction Disassembly	0.00311862	0.0405949	0.431708	1.68581	6	GO:0150147	BP
Cell Cell Junction Organization	0.0121368	0.101807	0.38073	1.52527	179	GO:0045216	BP
Cell Cell Recognition	0.0210691	0.144045	0.352488	1.62476	44	GO:0009988	BP
Cell Chemotaxis	1.64918e-14	4.2219e-12	0.975995	2.18148	230	GO:0060326	BP
Cell Differentiation In Spinal Cord	0.00907363	0.0848301	0.38073	-1.71013	37	GO:0021515	BP
Cell Fate Specification	0.0326158	0.189446	0.321776	-1.49065	70	GO:0001708	BP
Cell Junction Disassembly	2.32612e-05	0.00089822	0.57561	2.03842	30	GO:0150146	BP
Cell Killing	4.00808e-14	9.23461e-12	0.965328	2.28477	115	GO:0001906	BP
Cell Matrix Adhesion	0.00495982	0.0556531	0.407018	1.61017	196	GO:0007160	BP
Cell Maturation	0.00551527	0.0596336	0.407018	1.60357	171	GO:0048469	BP
Cell Proliferation In Forebrain	0.0155595	0.119267	0.38073	-1.65902	30	GO:0021846	BP
Cell Substrate Adhesion	0.000273131	0.00653806	0.498493	1.57573	323	GO:0031589	BP
Cell Surface Pattern Recognition Receptor Signaling Pathway	0.00377296	0.0465691	0.431708	1.73109	64	GO:0002752	BP
Cell Surface Receptor Signaling Pathway Via Stat	2.42176e-05	0.000923378	0.57561	1.94331	117	GO:0097696	BP
Cellular Component Disassembly	0.000152912	0.00403409	0.518848	1.60047	383	GO:0022411	BP
Cellular Defense Response	0.00398267	0.0484651	0.407018	1.67969	9	GO:0006968	BP
Cellular Extravasation	4.63716e-07	2.89937e-05	0.674963	2.11484	55	GO:0045123	BP
Cellular Oxidant Detoxification	0.0241228	0.156244	0.352488	1.54096	61	GO:0098869	BP
Cellular Respiration	0.00204666	0.0299715	0.431708	-1.46998	201	GO:0045333	BP
Cellular Response To Abiotic Stimulus	0.00114693	0.0198686	0.45506	1.55791	293	GO:0071214	BP
Cellular Response To Acid Chemical	0.0290023	0.175692	0.287857	1.47888	96	GO:0071229	BP
Cellular Response To Biotic Stimulus	3.66954e-15	1.05683e-12	0.996986	2.23821	201	GO:0071216	BP
Cellular Response To Camp	0.0205382	0.141394	0.352488	1.5728	46	GO:0071320	BP
Cellular Response To External Stimulus	0.00242818	0.0339749	0.431708	1.74823	70	GO:0071496	BP
Cellular Response To Glucose Starvation	0.034713	0.198458	0.282013	1.51131	45	GO:0042149	BP
Cellular Response To Glycine	0.0247879	0.158937	0.352488	-1.53082	5	GO:1905430	BP
Cellular Response To Interleukin 1	0.000602572	0.0124328	0.477271	1.8476	66	GO:0071347	BP
Cellular Response To Interleukin 2	0.0196132	0.138019	0.352488	1.53131	5	GO:0071352	BP
Cellular Response To Lipid	6.50931e-10	7.14165e-08	0.801216	1.8266	488	GO:0071396	BP
Cellular Response To Lipoprotein Particle Stimulus	0.00931752	0.0856796	0.38073	1.77835	32	GO:0071402	BP
Cellular Response To Osmotic Stress	0.0183212	0.131406	0.352488	1.59377	53	GO:0071470	BP
Cellular Response To Purine Containing Compound	0.0135399	0.11011	0.38073	1.61295	12	GO:0071415	BP
Cellular Response To Type Ii Interferon	0.000307488	0.0072046	0.498493	1.83331	88	GO:0071346	BP
Cellular Response To Virus	0.00127823	0.0216157	0.45506	1.77114	42	GO:0098586	BP
Central Nervous System Neuron Development	0.0339582	0.195274	0.321776	-1.44167	98	GO:0021954	BP
Chemical Synaptic Transmission Postsynaptic	0.00178602	0.0272629	0.45506	-1.6165	119	GO:0099565	BP
Chemokine Production	1.17404e-05	0.000506787	0.593325	2.03257	83	GO:0032602	BP
Chronic Inflammatory Response	0.00246018	0.0342149	0.431708	1.74148	12	GO:0002544	BP
Collagen Activated Signaling Pathway	0.0325815	0.189405	0.282013	1.52316	58	GO:0038065	BP
Collagen Biosynthetic Process	0.0319285	0.187184	0.287857	1.49198	52	GO:0032964	BP
Collagen Metabolic Process	0.0087445	0.082346	0.38073	1.60985	97	GO:0032963	BP
Complement Activation	1.80819e-08	1.52417e-06	0.733762	2.08599	29	GO:0006956	BP
Complement Activation Alternative Pathway	0.000410447	0.00909299	0.498493	1.72252	6	GO:0006957	BP
Complement Activation Classical Pathway	5.4294e-05	0.00180423	0.557332	1.91804	16	GO:0006958	BP
Complement Dependent Cytotoxicity	0.000966463	0.0175333	0.477271	1.70932	6	GO:0097278	BP
Complement Receptor Mediated Signaling Pathway	0.000129956	0.00365145	0.518848	1.73804	6	GO:0002430	BP
Copper Ion Import	0.00438014	0.0514016	0.407018	1.67809	7	GO:0015677	BP
Copper Ion Transmembrane Transport	0.0321583	0.188053	0.321776	1.55525	10	GO:0035434	BP
Cortical Cytoskeleton Organization	0.0200336	0.139871	0.352488	1.57798	56	GO:0030865	BP
Corticospinal Tract Morphogenesis	0.019893	0.13917	0.352488	-1.67362	10	GO:0021957	BP
Cyclooxygenase Pathway	0.0137714	0.111071	0.38073	1.62389	8	GO:0019371	BP
Cytokine Mediated Signaling Pathway	7.56172e-17	2.61333e-14	1.05746	2.08781	373	GO:0019221	BP
Cytokine Production Involved In Immune Response	3.73062e-05	0.00132918	0.557332	1.96832	113	GO:0002367	BP
Cytokine Production Involved In Inflammatory Response	0.0115598	0.0987652	0.38073	1.65516	52	GO:0002534	BP
Cytoplasmic Pattern Recognition Receptor Signaling Pathway	0.000174486	0.00446685	0.518848	1.80608	159	GO:0002753	BP
Cytoplasmic Translation	0.0119851	0.101149	0.38073	1.55901	132	GO:0002181	BP
Cytoskeleton Dependent Intracellular Transport	0.000154939	0.00407201	0.518848	-1.6748	190	GO:0030705	BP
Defense Response To Bacterium	7.77738e-15	2.06759e-12	0.986546	2.26983	164	GO:0042742	BP
Defense Response To Fungus	9.87818e-06	0.000437679	0.593325	1.97915	29	GO:0050832	BP
Defense Response To Gram Negative Bacterium	0.000173022	0.00444583	0.518848	1.89847	42	GO:0050829	BP
Defense Response To Gram Positive Bacterium	3.92537e-07	2.48919e-05	0.674963	2.09151	57	GO:0050830	BP
Defense Response To Virus	2.13388e-06	0.00011259	0.627257	1.86483	231	GO:0051607	BP
Dehydroascorbic Acid Transport	0.0188448	0.13387	0.352488	1.61685	7	GO:0070837	BP
Delamination	0.0260374	0.164481	0.352488	1.59403	7	GO:0060232	BP
Dendritic Cell Antigen Processing And Presentation	0.00706678	0.0710123	0.407018	1.63718	11	GO:0002468	BP
Dendritic Cell Apoptotic Process	0.0231112	0.151993	0.352488	1.57789	10	GO:0097048	BP
Dendritic Cell Chemotaxis	0.0040408	0.0490861	0.407018	1.71385	13	GO:0002407	BP
Dendritic Cell Cytokine Production	0.00870117	0.0820498	0.38073	1.65793	15	GO:0002371	BP
Dendritic Cell Differentiation	5.60119e-08	4.20819e-06	0.719513	2.08786	34	GO:0097028	BP
Dendritic Cell Migration	0.000661674	0.0133338	0.477271	1.8063	19	GO:0036336	BP
Dendritic Transport	0.00390069	0.0477814	0.431708	-1.80958	19	GO:0098935	BP
Detection Of Biotic Stimulus	0.00254206	0.0350505	0.431708	1.80146	28	GO:0009595	BP
Detection Of Chemical Stimulus	0.0250222	0.160142	0.352488	1.54752	38	GO:0009593	BP
Detection Of External Biotic Stimulus	0.00441181	0.0515981	0.407018	1.71949	19	GO:0098581	BP
Detection Of Other Organism	0.0165472	0.123666	0.352488	1.60806	10	GO:0098543	BP
Detection Of Stimulus	0.0108376	0.0943445	0.38073	1.54233	142	GO:0051606	BP
Development Of Primary Sexual Characteristics	0.0245368	0.15806	0.352488	1.45079	201	GO:0045137	BP
Diencephalon Development	0.00155506	0.0247093	0.45506	-1.73196	61	GO:0021536	BP
Disruption Of Anatomical Structure In Another Organism	3.05654e-06	0.000151992	0.627257	2.00059	36	GO:0141060	BP
Eif2alpha Phosphorylation In Response To Endoplasmic Reticulum Stress	0.0224411	0.149868	0.352488	-1.54946	5	GO:0036492	BP
Electron Transport Chain	0.00109084	0.0192836	0.45506	-1.74755	87	GO:0022900	BP
Embryo Implantation	0.0169096	0.124385	0.352488	1.61239	52	GO:0007566	BP
Endocardial Cushion Formation	0.0287524	0.174637	0.352488	1.60594	28	GO:0003272	BP
Endocrine Pancreas Development	0.0273613	0.17038	0.352488	-1.56569	36	GO:0031018	BP
Endocrine Process	0.00893055	0.0838696	0.38073	1.67939	80	GO:0050886	BP
Endolysosomal Toll Like Receptor Signaling Pathway	0.00384616	0.0472196	0.431708	1.83185	43	GO:0140894	BP
Endoplasmic Reticulum Localization	0.0118314	0.100219	0.38073	-1.69032	8	GO:0051643	BP
Endoplasmic Reticulum Organization	0.00327432	0.0417164	0.431708	-1.6323	93	GO:0007029	BP
Endoplasmic Reticulum Plasma Membrane Tethering	0.00150104	0.0240166	0.45506	-1.73852	5	GO:0061817	BP
Endothelial Cell Apoptotic Process	0.0200596	0.139911	0.352488	1.63623	48	GO:0072577	BP
Endothelial Cell Chemotaxis	0.0163701	0.123661	0.352488	1.59178	29	GO:0035767	BP
Endothelial Cell Development	0.0006348	0.0129051	0.477271	1.8359	70	GO:0001885	BP
Endothelial Cell Differentiation	0.00128195	0.0216157	0.45506	1.7926	115	GO:0045446	BP
Endothelial Cell Migration	0.000102282	0.00306048	0.538434	1.7418	219	GO:0043542	BP
Endothelial Cell Proliferation	0.0306929	0.182353	0.352488	1.47299	141	GO:0001935	BP
Endothelium Development	0.00425237	0.0506766	0.407018	1.66432	140	GO:0003158	BP
Energy Derivation By Oxidation Of Organic Compounds	0.0148641	0.116091	0.38073	-1.25198	291	GO:0015980	BP
Epithelial Cell Apoptotic Process	0.0229795	0.151634	0.352488	1.5681	86	GO:1904019	BP
Epithelial Cell Development	0.0259875	0.164342	0.287857	1.42683	211	GO:0002064	BP
Epithelial Cell Proliferation	0.00810128	0.0781302	0.38073	1.41064	402	GO:0050673	BP
Epithelial To Mesenchymal Transition Involved In Endocardial Cushion Formation	0.00944527	0.0863555	0.38073	1.67504	16	GO:0003198	BP
Erk1 And Erk2 Cascade	2.0665e-09	2.1118e-07	0.774939	1.94621	277	GO:0070371	BP
Erythrocyte Development	0.0203725	0.140815	0.352488	1.57527	40	GO:0048821	BP
Erythrocyte Homeostasis	0.0115893	0.0988956	0.38073	1.51682	145	GO:0034101	BP
Establishment Of Endothelial Barrier	0.00125637	0.0213892	0.45506	1.89102	50	GO:0061028	BP
Establishment Of Lymphocyte Polarity	0.0199745	0.139599	0.352488	1.58521	12	GO:0001767	BP
Establishment Of Protein Localization To Membrane	0.0351561	0.199999	0.321776	-1.24988	243	GO:0090150	BP
Establishment Of Protein Localization To Postsynaptic Membrane	0.0344176	0.197207	0.321776	-1.55153	21	GO:1903540	BP
Exocytosis	0.0137051	0.110795	0.38073	1.40599	340	GO:0006887	BP
Extracellular Matrix Disassembly	0.013889	0.111268	0.38073	1.66271	27	GO:0022617	BP
Extracellular Structure Organization	0.00649107	0.0667847	0.407018	1.51492	275	GO:0043062	BP
Extrinsic Apoptotic Signaling Pathway	0.0021957	0.0315268	0.431708	1.64776	196	GO:0097191	BP
Fatty Acid Derivative Biosynthetic Process	0.0241043	0.156244	0.352488	-1.59689	34	GO:1901570	BP
Fatty Acid Elongation	0.0194135	0.136785	0.352488	-1.6371	13	GO:0030497	BP
Fatty Acid Elongation Saturated Fatty Acid	0.00557065	0.0597894	0.407018	-1.7562	7	GO:0019367	BP
Fatty Acid Metabolic Process	0.00929291	0.0856796	0.38073	1.4381	314	GO:0006631	BP
Fatty Acid Transport	0.000124651	0.00351668	0.518848	1.88622	87	GO:0015908	BP
Fatty Acyl Coa Biosynthetic Process	0.00190915	0.0284398	0.45506	-1.87296	11	GO:0046949	BP
Fc Receptor Mediated Stimulatory Signaling Pathway	0.00476167	0.0541327	0.407018	1.73669	16	GO:0002431	BP
Female Sex Differentiation	0.0283126	0.173336	0.287857	1.45983	117	GO:0046660	BP
Fever Generation	5.13061e-05	0.00173758	0.557332	1.80044	11	GO:0001660	BP
Fibroblast Proliferation	0.0114122	0.0976249	0.38073	1.5654	127	GO:0048144	BP
Filopodium Assembly	0.0102006	0.0908799	0.38073	1.61924	66	GO:0046847	BP
Foam Cell Differentiation	0.00292386	0.0384572	0.431708	1.76806	25	GO:0090077	BP
Folic Acid Transport	0.0239883	0.156244	0.352488	1.58536	8	GO:0015884	BP
Forebrain Morphogenesis	0.0294883	0.177523	0.352488	-1.63137	11	GO:0048853	BP
G Protein Coupled Glutamate Receptor Signaling Pathway	0.00181818	0.0274237	0.45506	-1.87175	15	GO:0007216	BP
G Protein Coupled Purinergic Nucleotide Receptor Signaling Pathway	0.00186039	0.0278938	0.45506	1.70825	7	GO:0035589	BP
G Protein Coupled Serotonin Receptor Signaling Pathway	0.0337419	0.194192	0.321776	-1.61565	14	GO:0098664	BP
Gamma Delta T Cell Activation	0.0120625	0.101554	0.38073	1.71134	18	GO:0046629	BP
Gamma Delta T Cell Differentiation	0.00390682	0.0477814	0.407018	1.73935	14	GO:0042492	BP
Gap Junction Assembly	0.0269394	0.168207	0.352488	1.57905	15	GO:0016264	BP
Gastro Intestinal System Smooth Muscle Contraction	0.00737211	0.0731076	0.407018	1.65595	7	GO:0014831	BP
Germinal Center B Cell Differentiation	0.0095745	0.0868967	0.38073	1.65853	6	GO:0002314	BP
Germinal Center Formation	0.000811268	0.0154476	0.477271	1.77685	13	GO:0002467	BP
Gland Development	0.0344828	0.197305	0.245042	1.30632	397	GO:0048732	BP
Glial Cell Activation	2.37978e-06	0.000120949	0.627257	2.08492	51	GO:0061900	BP
Glial Cell Development	0.00822116	0.0789232	0.38073	1.61142	140	GO:0021782	BP
Glial Cell Differentiation	0.0278926	0.171817	0.276501	1.37768	271	GO:0010001	BP
Glial Cell Migration	0.0278214	0.171545	0.352488	1.52354	70	GO:0008347	BP
Glial Cell Proliferation	0.0325301	0.189405	0.276501	1.50435	74	GO:0014009	BP
Gliogenesis	0.00325563	0.0416721	0.431708	1.44407	364	GO:0042063	BP
Glutamate Receptor Signaling Pathway	0.0108243	0.0943445	0.38073	-1.59983	59	GO:0007215	BP
Glycerolipid Biosynthetic Process	0.0173233	0.12644	0.352488	1.52769	187	GO:0045017	BP
Glycerolipid Metabolic Process	0.00241452	0.0338523	0.431708	1.50181	313	GO:0046486	BP
Glycine Import Across Plasma Membrane	0.00959233	0.0868967	0.38073	-1.70188	6	GO:1903804	BP
Glycoprotein Catabolic Process	0.0258409	0.163714	0.352488	1.55794	33	GO:0006516	BP
Granulocyte Activation	2.84143e-09	2.69041e-07	0.774939	2.12012	36	GO:0036230	BP
Granulocyte Chemotaxis	4.97458e-09	4.46549e-07	0.761461	2.17169	87	GO:0071621	BP
Granulocyte Colony Stimulating Factor Signaling Pathway	0.00380141	0.0467888	0.431708	1.60979	5	GO:0038158	BP
Granulocyte Differentiation	0.00457192	0.052647	0.407018	1.70067	41	GO:0030851	BP
Granulocyte Macrophage Colony Stimulating Factor Production	5.63858e-05	0.0018559	0.557332	1.79912	11	GO:0032604	BP
Granulocyte Migration	8.22551e-13	1.5793e-10	0.921426	2.2597	109	GO:0097530	BP
Heat Generation	0.00237425	0.0334233	0.431708	1.74887	19	GO:0031649	BP
Hematopoietic Or Lymphoid Organ Development	0.000219845	0.00542703	0.518848	1.91096	96	GO:0048534	BP
Hematopoietic Progenitor Cell Differentiation	0.00178676	0.0272629	0.45506	1.69062	145	GO:0002244	BP
Hemostasis	1.67957e-06	9.21364e-05	0.643552	1.98792	146	GO:0007599	BP
Hepatocyte Apoptotic Process	0.0254638	0.162065	0.352488	1.62516	26	GO:0097284	BP
Hepatocyte Growth Factor Receptor Signaling Pathway	0.0291916	0.17622	0.352488	1.51997	53	GO:0048012	BP
Heterophilic Cell Cell Adhesion Via Plasma Membrane Cell Adhesion Molecules	0.0122444	0.10245	0.38073	1.65078	43	GO:0007157	BP
Heterotypic Cell Cell Adhesion	0.0038043	0.0467888	0.431708	1.8564	44	GO:0034113	BP
Homeostasis Of Number Of Cells	9.76117e-06	0.000435285	0.593325	1.70742	335	GO:0048872	BP
Homotypic Cell Cell Adhesion	0.00209597	0.0306286	0.431708	1.77488	69	GO:0034109	BP
Humoral Immune Response	1.97752e-11	2.90822e-09	0.863415	2.28224	89	GO:0006959	BP
Humoral Immune Response Mediated By Circulating Immunoglobulin	3.2369e-05	0.00117138	0.557332	2.02818	24	GO:0002455	BP
Hyaluronan Biosynthetic Process	0.026141	0.16477	0.352488	1.55811	12	GO:0030213	BP
Hydrogen Peroxide Biosynthetic Process	0.00748203	0.0736692	0.407018	1.67332	13	GO:0050665	BP
Hypersensitivity	0.00016395	0.00422845	0.518848	1.74556	7	GO:0002524	BP
I Kappab Phosphorylation	0.0204361	0.14098	0.352488	1.60847	13	GO:0007252	BP
Icosanoid Biosynthetic Process	2.04488e-05	0.000797562	0.57561	1.93801	36	GO:0046456	BP
Icosanoid Metabolic Process	1.22806e-06	6.90111e-05	0.643552	2.05985	70	GO:0006690	BP
Icosanoid Secretion	0.00226406	0.0322	0.431708	1.84948	35	GO:0032309	BP
Icosanoid Transport	0.000625374	0.0128267	0.477271	1.94223	47	GO:0071715	BP
Immature B Cell Differentiation	0.0310443	0.183244	0.352488	1.56895	15	GO:0002327	BP
Immature T Cell Proliferation	0.0100984	0.0905321	0.38073	1.64783	15	GO:0033079	BP
Immune Effector Process	4.31153e-35	2.98013e-31	1.54318	2.30403	448	GO:0002252	BP
Immune Response Regulating Cell Surface Receptor Signaling Pathway	2.85792e-12	4.70331e-10	0.898671	2.15038	209	GO:0002768	BP
Immune Response Regulating Signaling Pathway	3.53074e-18	1.74318e-15	1.09593	2.11141	377	GO:0002764	BP
Immune System Development	4.16276e-05	0.00143149	0.557332	1.85537	167	GO:0002520	BP
Immunoglobulin Production	0.000348227	0.00797001	0.498493	1.89005	95	GO:0002377	BP
Immunoglobulin Production Involved In Immunoglobulin Mediated Immune Response	0.00633193	0.0657151	0.407018	1.72805	50	GO:0002381	BP
Immunological Memory Formation Process	0.0174063	0.126778	0.352488	1.62104	7	GO:0090715	BP
Immunological Memory Process	0.0123832	0.103248	0.38073	1.62647	9	GO:0090713	BP
Immunological Synapse Formation	0.0035892	0.0450245	0.431708	1.74429	14	GO:0001771	BP
Imp Catabolic Process	0.0220458	0.148086	0.352488	1.52849	5	GO:0006204	BP
Inclusion Body Assembly	0.0110057	0.0954473	0.38073	-1.67277	27	GO:0070841	BP
Induction Of Positive Chemotaxis	0.0226556	0.150573	0.352488	1.57192	12	GO:0050930	BP
Inflammasome Mediated Signaling Pathway	0.0208874	0.142944	0.352488	1.57485	43	GO:0141084	BP
Inflammatory Response To Antigenic Stimulus	0.000295433	0.00694569	0.498493	1.98101	45	GO:0002437	BP
Inflammatory Response To Wounding	0.000407278	0.00905179	0.498493	1.87745	23	GO:0090594	BP
Inhibitory Postsynaptic Potential	0.00767158	0.0752142	0.407018	-1.76397	24	GO:0060080	BP
Innate Immune Response Activating Cell Surface Receptor Signaling Pathway	0.00141482	0.0231736	0.45506	1.77979	66	GO:0002220	BP
Inorganic Ion Homeostasis	0.0262097	0.164992	0.282013	1.3064	443	GO:0098771	BP
Inositol Phosphate Biosynthetic Process	0.0143413	0.113678	0.38073	1.72573	24	GO:0032958	BP
Inositol Trisphosphate Biosynthetic Process	0.0180135	0.130202	0.352488	1.60086	9	GO:0032959	BP
Inositol Trisphosphate Metabolic Process	0.00559319	0.0598454	0.407018	1.67836	15	GO:0032957	BP
Integrin Activation	0.00149918	0.0240166	0.45506	1.89861	22	GO:0033622	BP
Integrin Mediated Signaling Pathway	4.90794e-06	0.000238899	0.610527	2.05499	90	GO:0007229	BP
Interferon Alpha Production	0.0310103	0.183199	0.352488	1.59514	30	GO:0032607	BP
Interferon Beta Production	0.0116445	0.0991916	0.38073	1.63589	60	GO:0032608	BP
Interkinetic Nuclear Migration	0.0295621	0.177527	0.352488	-1.6235	9	GO:0022027	BP
Interleukin 1 Beta Production	5.1534e-05	0.00173758	0.557332	1.97967	75	GO:0032611	BP
Interleukin 1 Mediated Signaling Pathway	0.00542709	0.0592607	0.407018	1.79668	26	GO:0070498	BP
Interleukin 1 Production	5.26949e-06	0.000252935	0.610527	2.00358	87	GO:0032612	BP
Interleukin 10 Mediated Signaling Pathway	0.00095967	0.0174559	0.477271	1.64025	5	GO:0140105	BP
Interleukin 10 Production	0.000838466	0.015878	0.477271	1.93935	45	GO:0032613	BP
Interleukin 12 Production	0.00477155	0.0541559	0.407018	1.854	45	GO:0032615	BP
Interleukin 18 Production	0.00728038	0.0727196	0.407018	1.67181	10	GO:0032621	BP
Interleukin 2 Production	0.00113437	0.01975	0.45506	1.81917	53	GO:0032623	BP
Interleukin 23 Production	0.0289144	0.175313	0.352488	1.58547	7	GO:0032627	BP
Interleukin 3 Mediated Signaling Pathway	0.0215585	0.146476	0.352488	1.62401	6	GO:0038156	BP
Interleukin 4 Mediated Signaling Pathway	0.00013596	0.00371856	0.518848	1.77056	9	GO:0035771	BP
Interleukin 4 Production	0.00565272	0.0602957	0.407018	1.71253	25	GO:0032633	BP
Interleukin 6 Production	1.15947e-10	1.48412e-08	0.839089	2.18583	132	GO:0032635	BP
Interleukin 8 Production	7.0308e-07	4.22582e-05	0.659444	2.07949	57	GO:0032637	BP
Intracellular Monoatomic Ion Homeostasis	0.013347	0.109048	0.38073	1.33292	444	GO:0006873	BP
Intracellular Potassium Ion Homeostasis	0.0291551	0.17622	0.352488	-1.63481	11	GO:0030007	BP
Intracellular Receptor Signaling Pathway	0.00316848	0.0409356	0.431708	1.46712	331	GO:0030522	BP
Intrinsic Apoptotic Signaling Pathway In Response To Dna Damage	0.0308715	0.182848	0.352488	1.51044	96	GO:0008630	BP
Iris Morphogenesis	0.0109688	0.0952463	0.38073	1.56276	5	GO:0061072	BP
Isoprenoid Biosynthetic Process	0.0322268	0.188294	0.321776	-1.55042	27	GO:0008299	BP
Jnk Cascade	0.0318624	0.186955	0.321776	1.43377	176	GO:0007254	BP
Killing By Host Of Symbiont Cells	0.0104676	0.0922857	0.38073	1.6353	9	GO:0051873	BP
Killing Of Cells Of Another Organism	5.35695e-06	0.00025536	0.610527	2.04718	33	GO:0031640	BP
Lacrimal Gland Development	0.0113508	0.0974614	0.38073	-1.69951	7	GO:0032808	BP
Lamellipodium Assembly	0.0220336	0.148086	0.352488	1.59261	67	GO:0030032	BP
Lamellipodium Organization	0.0197498	0.138449	0.352488	1.56642	84	GO:0097581	BP
Leukocyte Activation Involved In Inflammatory Response	5.46535e-05	0.00180749	0.557332	2.02726	44	GO:0002269	BP
Leukocyte Adhesion To Vascular Endothelial Cell	1.79095e-06	9.67115e-05	0.643552	1.98616	38	GO:0061756	BP
Leukocyte Aggregation	0.000709138	0.0139249	0.477271	1.86249	16	GO:0070486	BP
Leukocyte Apoptotic Process	2.99496e-05	0.00110232	0.57561	1.94455	109	GO:0071887	BP
Leukocyte Cell Cell Adhesion	4.37252e-17	1.59068e-14	1.06721	2.16984	296	GO:0007159	BP
Leukocyte Chemotaxis	1.00107e-13	2.09679e-11	0.954542	2.23914	166	GO:0030595	BP
Leukocyte Degranulation	5.27406e-07	3.22605e-05	0.659444	2.09007	64	GO:0043299	BP
Leukocyte Homeostasis	0.000121813	0.00346491	0.538434	1.92512	107	GO:0001776	BP
Leukocyte Mediated Cytotoxicity	8.29225e-06	0.000372182	0.593325	2.03145	81	GO:0001909	BP
Leukocyte Mediated Immunity	1.22686e-24	2.12002e-21	1.2871	2.31744	275	GO:0002443	BP
Leukocyte Migration	1.77372e-22	2.452e-19	1.2295	2.25273	287	GO:0050900	BP
Leukocyte Migration Involved In Inflammatory Response	0.00445561	0.0518471	0.407018	1.69027	15	GO:0002523	BP
Leukocyte Proliferation	9.62609e-16	3.02434e-13	1.01754	2.15239	266	GO:0070661	BP
Leukocyte Tethering Or Rolling	0.000577182	0.0121261	0.477271	1.95668	24	GO:0050901	BP
Leukotriene Metabolic Process	0.00270979	0.036525	0.431708	1.78358	16	GO:0006691	BP
Limb Bud Formation	0.0276022	0.171417	0.352488	-1.62892	9	GO:0060174	BP
Lipid Export From Cell	0.000589846	0.0122433	0.477271	1.85799	46	GO:0140353	BP
Lipid Localization	6.53017e-05	0.00208891	0.538434	1.66782	341	GO:0010876	BP
Lipopolysaccharide Mediated Signaling Pathway	1.47374e-05	0.000606337	0.593325	2.00753	53	GO:0031663	BP
Liver Morphogenesis	0.0322641	0.188353	0.321776	1.5941	28	GO:0072576	BP
Locomotory Behavior	0.00185723	0.0278938	0.45506	-1.43284	244	GO:0007626	BP
Long Chain Fatty Acid Transport	0.0146168	0.114835	0.38073	1.6322	52	GO:0015909	BP
Long Chain Fatty Acyl Coa Biosynthetic Process	0.00489223	0.0551632	0.407018	-1.79287	9	GO:0035338	BP
Lymph Node Development	5.95617e-05	0.00195114	0.557332	1.95002	25	GO:0048535	BP
Lymphocyte Activation Involved In Immune Response	2.95289e-11	4.19843e-09	0.851339	2.19016	153	GO:0002285	BP
Lymphocyte Aggregation	0.0159643	0.12166	0.352488	1.54601	5	GO:0071593	BP
Lymphocyte Apoptotic Process	0.00600576	0.0633768	0.407018	1.75725	79	GO:0070227	BP
Lymphocyte Chemotaxis	0.00157367	0.0247772	0.45506	1.84494	28	GO:0048247	BP
Lymphocyte Costimulation	0.0230259	0.151634	0.352488	1.62468	18	GO:0031294	BP
Lymphocyte Differentiation	2.07371e-10	2.60609e-08	0.826657	1.93606	342	GO:0030098	BP
Lymphocyte Homeostasis	0.00786613	0.0767948	0.38073	1.73164	73	GO:0002260	BP
Lymphocyte Mediated Immunity	7.54637e-15	2.06759e-12	0.986546	2.22543	198	GO:0002449	BP
Lymphocyte Migration	7.08281e-05	0.0022457	0.538434	1.98975	77	GO:0072676	BP
Macrophage Activation	1.87894e-07	1.27326e-05	0.690132	2.14087	92	GO:0042116	BP
Macrophage Activation Involved In Immune Response	0.000391531	0.00878657	0.498493	1.8168	17	GO:0002281	BP
Macrophage Chemotaxis	0.0103267	0.0916277	0.38073	1.75346	31	GO:0048246	BP
Macrophage Cytokine Production	0.00909555	0.0848427	0.38073	1.74666	48	GO:0010934	BP
Macrophage Differentiation	0.000668991	0.0134031	0.477271	1.85588	56	GO:0030225	BP
Macrophage Migration	0.00519891	0.0573124	0.407018	1.70183	49	GO:1905517	BP
Maintenance Of Cell Polarity	0.0132386	0.10829	0.38073	1.63199	13	GO:0030011	BP
Maintenance Of Location	0.000187141	0.00473818	0.518848	1.77943	197	GO:0051235	BP
Maintenance Of Protein Location In Mitochondrion	0.0165725	0.123666	0.352488	1.54241	5	GO:0072656	BP
Manganese Ion Transport	0.0197064	0.138285	0.352488	1.58932	12	GO:0006828	BP
Marginal Zone B Cell Differentiation	0.0138883	0.111268	0.38073	1.61746	9	GO:0002315	BP
Mast Cell Activation	1.13587e-05	0.000493782	0.593325	2.02039	62	GO:0045576	BP
Mast Cell Activation Involved In Immune Response	0.000105581	0.00310543	0.538434	1.93289	46	GO:0002279	BP
Mast Cell Chemotaxis	0.00512332	0.0571862	0.407018	1.66012	11	GO:0002551	BP
Mast Cell Proliferation	0.00445136	0.0518471	0.407018	1.67774	7	GO:0070662	BP
Mature B Cell Differentiation	0.000111476	0.00325114	0.538434	1.91132	34	GO:0002335	BP
Mature B Cell Differentiation Involved In Immune Response	0.000985162	0.0177329	0.45506	1.9038	27	GO:0002313	BP
Megakaryocyte Development	0.0055316	0.0596336	0.407018	1.68218	21	GO:0035855	BP
Membrane Invagination	1.72083e-05	0.000691533	0.57561	2.02327	56	GO:0010324	BP
Membrane Lipid Biosynthetic Process	0.0165855	0.123666	0.352488	-1.43126	119	GO:0046467	BP
Membrane Protein Proteolysis	0.0138143	0.111268	0.38073	1.61433	54	GO:0033619	BP
Membrane Raft Localization	0.00271084	0.036525	0.431708	1.69708	7	GO:0051665	BP
Membrane Raft Organization	0.0211069	0.144161	0.352488	1.63223	27	GO:0031579	BP
Membrane To Membrane Docking	0.00163049	0.0254976	0.45506	1.63119	5	GO:0022614	BP
Mesenchyme Morphogenesis	0.0258348	0.163714	0.352488	1.52521	51	GO:0072132	BP
Microautophagy	0.003504	0.0441159	0.431708	-1.77308	21	GO:0016237	BP
Microglia Development	0.00945585	0.0863555	0.38073	1.57042	5	GO:0014005	BP
Microglia Differentiation	0.0230259	0.151634	0.352488	1.6249	18	GO:0014004	BP
Microglial Cell Activation Involved In Immune Response	0.0058338	0.0619404	0.407018	1.59389	5	GO:0002282	BP
Microtubule Based Movement	0.000134273	0.00371856	0.518848	-1.36254	371	GO:0007018	BP
Microtubule Based Transport	0.000188258	0.00474904	0.518848	-1.59831	217	GO:0099111	BP
Microtubule Cytoskeleton Organization Involved In Mitosis	0.0114027	0.0976249	0.38073	-1.37041	148	GO:1902850	BP
Microtubule Nucleation	0.0328836	0.190813	0.321776	-1.53804	35	GO:0007020	BP
Mitochondrial Atp Transmembrane Transport	0.00294464	0.0386212	0.431708	-1.7003	5	GO:1990544	BP
Mitochondrial Calcium Ion Homeostasis	0.00486881	0.0549889	0.407018	-1.78134	22	GO:0051560	BP
Mitochondrial Electron Transport Ubiquinol To Cytochrome C	0.0180272	0.130202	0.352488	-1.67898	12	GO:0006122	BP
Mitochondrial Fragmentation Involved In Apoptotic Process	0.0043792	0.0514016	0.407018	-1.82832	12	GO:0043653	BP
Modulation By Symbiont Of Entry Into Host	0.0081322	0.0782866	0.38073	1.71695	20	GO:0052372	BP
Modulation Of Excitatory Postsynaptic Potential	0.020113	0.140142	0.352488	-1.45935	61	GO:0098815	BP
Monocarboxylic Acid Metabolic Process	0.0262361	0.165008	0.282013	1.30112	471	GO:0032787	BP
Monocarboxylic Acid Transport	0.000799238	0.0152606	0.477271	1.794	122	GO:0015718	BP
Monocyte Aggregation	0.00141928	0.0231917	0.45506	1.71542	7	GO:0070487	BP
Monocyte Chemotactic Protein 1 Production	0.0135894	0.110131	0.38073	1.65828	17	GO:0071605	BP
Monocyte Chemotaxis	0.00717394	0.0718641	0.407018	1.68348	29	GO:0002548	BP
Monocyte Differentiation	0.0279153	0.171817	0.352488	1.60354	27	GO:0030224	BP
Mononuclear Cell Differentiation	2.12571e-17	8.16273e-15	1.07687	2.0581	419	GO:1903131	BP
Mononuclear Cell Migration	7.82987e-10	8.45626e-08	0.801216	2.08999	165	GO:0071674	BP
Monosaccharide Transmembrane Transport	0.000675373	0.0134919	0.477271	1.85171	96	GO:0015749	BP
Multi Multicellular Organism Process	0.0229696	0.151634	0.352488	1.4722	162	GO:0044706	BP
Muscle Cell Differentiation	0.0178585	0.129254	0.352488	1.38302	389	GO:0042692	BP
Muscle Cell Proliferation	0.00693239	0.0700536	0.407018	1.46677	240	GO:0033002	BP
Myd88 Dependent Toll Like Receptor Signaling Pathway	0.00156469	0.0247487	0.45506	1.80701	14	GO:0002755	BP
Myeloid Cell Activation Involved In Immune Response	4.24847e-10	4.89424e-08	0.814036	2.22317	79	GO:0002275	BP
Myeloid Cell Apoptotic Process	0.0171071	0.125222	0.352488	1.60755	33	GO:0033028	BP
Myeloid Cell Development	0.000258571	0.00629311	0.498493	1.90388	81	GO:0061515	BP
Myeloid Cell Differentiation	3.95428e-08	3.17813e-06	0.719513	1.82166	391	GO:0030099	BP
Myeloid Cell Homeostasis	0.00147374	0.0239119	0.45506	1.68264	181	GO:0002262	BP
Myeloid Dendritic Cell Activation	0.000137992	0.0037258	0.518848	1.85136	21	GO:0001773	BP
Myeloid Dendritic Cell Differentiation	0.00559319	0.0598454	0.407018	1.67811	15	GO:0043011	BP
Myeloid Leukocyte Activation	2.28797e-19	1.43768e-16	1.13309	2.32281	201	GO:0002274	BP
Myeloid Leukocyte Cytokine Production	0.00110039	0.0194028	0.45506	1.8697	61	GO:0061082	BP
Myeloid Leukocyte Differentiation	5.25416e-06	0.000252935	0.610527	1.85154	216	GO:0002573	BP
Myeloid Leukocyte Mediated Immunity	1.58291e-11	2.43134e-09	0.863415	2.26619	81	GO:0002444	BP
Myeloid Leukocyte Migration	9.48577e-14	2.04893e-11	0.954542	2.22574	175	GO:0097529	BP
Myeloid Progenitor Cell Differentiation	0.0277523	0.171429	0.352488	1.54784	12	GO:0002318	BP
Myoblast Fusion	0.0343832	0.197207	0.321776	1.53648	35	GO:0007520	BP
Myoblast Proliferation	0.00276112	0.0367869	0.431708	1.78243	23	GO:0051450	BP
Myotube Differentiation	0.0257688	0.163557	0.352488	1.54534	113	GO:0014902	BP
Nadh Dehydrogenase Complex Assembly	0.00607046	0.0637675	0.407018	-1.62294	53	GO:0010257	BP
Nadp Catabolic Process	0.00196627	0.0291025	0.431708	1.62691	5	GO:0006742	BP
Nadp Metabolic Process	0.0321271	0.188053	0.321776	1.52416	40	GO:0006739	BP
Natural Killer Cell Activation	0.00140228	0.0230776	0.45506	1.88021	59	GO:0030101	BP
Natural Killer Cell Differentiation	0.00419624	0.0503549	0.407018	1.77974	27	GO:0001779	BP
Natural Killer Cell Mediated Immune Response To Tumor Cell	0.0334428	0.192791	0.321776	1.59556	6	GO:0002423	BP
Natural Killer Cell Mediated Immunity	0.0252233	0.161119	0.352488	1.59294	48	GO:0002228	BP
Negative Regulation Of Adaptive Immune Response	0.00110759	0.01948	0.45506	1.80736	40	GO:0002820	BP
Negative Regulation Of Alpha Beta T Cell Activation	0.0203525	0.140815	0.352488	1.59328	37	GO:0046636	BP
Negative Regulation Of Alpha Beta T Cell Differentiation	0.0260571	0.164481	0.352488	1.66682	24	GO:0046639	BP
Negative Regulation Of Antigen Processing And Presentation	0.0135407	0.11011	0.38073	1.55565	5	GO:0002578	BP
Negative Regulation Of B Cell Activation	0.0049362	0.0554781	0.407018	1.81382	26	GO:0050869	BP
Negative Regulation Of B Cell Proliferation	0.00364129	0.0451997	0.431708	1.76206	16	GO:0030889	BP
Negative Regulation Of B Cell Receptor Signaling Pathway	0.0169286	0.124385	0.352488	1.63764	6	GO:0050859	BP
Negative Regulation Of Blood Vessel Endothelial Cell Proliferation Involved In Sprouting Angiogenesis	0.0239064	0.156244	0.352488	-1.61726	6	GO:1903588	BP
Negative Regulation Of Bone Remodeling	0.0122578	0.10245	0.38073	1.63472	15	GO:0046851	BP
Negative Regulation Of Calcium Ion Transport	0.0162328	0.123027	0.352488	1.60436	53	GO:0051926	BP
Negative Regulation Of Cardiac Muscle Cell Proliferation	0.0164328	0.123661	0.352488	-1.70611	14	GO:0060044	BP
Negative Regulation Of Cardiac Muscle Tissue Growth	0.0001192	0.00341871	0.538434	-2.06175	25	GO:0055022	BP
Negative Regulation Of Catabolic Process	0.0277778	0.171429	0.276501	1.36181	312	GO:0009895	BP
Negative Regulation Of Catalytic Activity	0.00420394	0.0503598	0.407018	1.50757	266	GO:0043086	BP
Negative Regulation Of Cd4 Positive Alpha Beta T Cell Differentiation	0.0146745	0.115043	0.38073	1.65227	20	GO:0043371	BP
Negative Regulation Of Cell Activation	2.69561e-07	1.75774e-05	0.674963	2.03888	162	GO:0050866	BP
Negative Regulation Of Cell Adhesion	5.50272e-06	0.000260512	0.610527	1.80818	247	GO:0007162	BP
Negative Regulation Of Cell Cell Adhesion	1.70741e-05	0.000690155	0.57561	1.87416	156	GO:0022408	BP
Negative Regulation Of Cell Cell Adhesion Mediated By Cadherin	0.0138883	0.111268	0.38073	1.61726	9	GO:2000048	BP
Negative Regulation Of Cell Development	0.00847574	0.0806947	0.38073	1.47565	247	GO:0010721	BP
Negative Regulation Of Cell Growth Involved In Cardiac Muscle Cell Development	0.00466036	0.0534202	0.407018	-1.81633	11	GO:0061052	BP
Negative Regulation Of Cell Junction Assembly	0.015407	0.118854	0.38073	1.62991	35	GO:1901889	BP
Negative Regulation Of Cell Killing	0.00107482	0.0191474	0.45506	1.83285	23	GO:0031342	BP
Negative Regulation Of Chemotaxis	0.00155959	0.0247244	0.45506	1.75119	38	GO:0050922	BP
Negative Regulation Of Cytokine Production	4.15329e-08	3.29971e-06	0.719513	1.95049	224	GO:0001818	BP
Negative Regulation Of Defense Response	0.00090043	0.0165316	0.477271	1.71427	197	GO:0031348	BP
Negative Regulation Of Dendritic Spine Maintenance	0.0192143	0.13605	0.352488	-1.56381	5	GO:1902951	BP
Negative Regulation Of Endocytosis	0.0223083	0.149125	0.352488	1.57097	62	GO:0045806	BP
Negative Regulation Of Endothelial Cell Differentiation	0.00474556	0.0540384	0.407018	1.7011	12	GO:0045602	BP
Negative Regulation Of Epithelial Cell Differentiation	0.0241419	0.156244	0.352488	1.55356	49	GO:0030857	BP
Negative Regulation Of Erk1 And Erk2 Cascade	0.0187009	0.133146	0.352488	1.58352	65	GO:0070373	BP
Negative Regulation Of Exocytosis	0.00858878	0.0815462	0.38073	1.79333	32	GO:0045920	BP
Negative Regulation Of Extracellular Matrix Organization	0.0163676	0.123661	0.352488	1.57969	11	GO:1903054	BP
Negative Regulation Of Glutamate Secretion	0.022285	0.149113	0.352488	1.5907	8	GO:0014050	BP
Negative Regulation Of Hemopoiesis	0.00362536	0.0451997	0.431708	1.78785	90	GO:1903707	BP
Negative Regulation Of Immune Effector Process	8.35711e-05	0.0025834	0.538434	1.95259	95	GO:0002698	BP
Negative Regulation Of Immune Response	0.000892859	0.0165316	0.477271	1.77498	140	GO:0050777	BP
Negative Regulation Of Immune System Process	2.51057e-09	2.4441e-07	0.774939	1.87887	400	GO:0002683	BP
Negative Regulation Of Inclusion Body Assembly	0.0272756	0.169999	0.352488	-1.63479	9	GO:0090084	BP
Negative Regulation Of Inflammatory Response	0.00198169	0.0292056	0.431708	1.7403	120	GO:0050728	BP
Negative Regulation Of Innate Immune Response	0.016894	0.124385	0.352488	1.62079	73	GO:0045824	BP
Negative Regulation Of Interleukin 1 Beta Production	0.00180683	0.0273692	0.45506	1.76253	19	GO:0032691	BP
Negative Regulation Of Interleukin 1 Production	0.00434186	0.0512308	0.407018	1.75951	23	GO:0032692	BP
Negative Regulation Of Interleukin 10 Production	0.00550436	0.0596336	0.407018	1.69493	13	GO:0032693	BP
Negative Regulation Of Interleukin 17 Production	0.00952835	0.0867454	0.38073	1.65561	13	GO:0032700	BP
Negative Regulation Of Interleukin 6 Production	0.00515384	0.0573124	0.407018	1.83208	32	GO:0032715	BP
Negative Regulation Of Kinase Activity	0.0308443	0.182844	0.352488	1.4435	160	GO:0033673	BP
Negative Regulation Of Leukocyte Apoptotic Process	0.000281481	0.00666598	0.498493	1.96466	50	GO:2000107	BP
Negative Regulation Of Leukocyte Cell Cell Adhesion	0.000217573	0.0053902	0.518848	1.88942	105	GO:1903038	BP
Negative Regulation Of Leukocyte Degranulation	0.00391785	0.0477814	0.407018	1.67574	11	GO:0043301	BP
Negative Regulation Of Leukocyte Mediated Immunity	0.000586391	0.0122082	0.477271	1.90792	51	GO:0002704	BP
Negative Regulation Of Leukocyte Migration	0.0296849	0.177955	0.352488	1.51539	36	GO:0002686	BP
Negative Regulation Of Leukocyte Proliferation	8.09536e-05	0.00253191	0.538434	1.93964	70	GO:0070664	BP
Negative Regulation Of Lipid Catabolic Process	0.00167385	0.0259993	0.45506	1.80518	23	GO:0050995	BP
Negative Regulation Of Lipid Metabolic Process	0.0204373	0.14098	0.352488	1.58069	82	GO:0045833	BP
Negative Regulation Of Locomotion	0.00253119	0.0350505	0.431708	1.53749	298	GO:0040013	BP
Negative Regulation Of Lymphocyte Activation	7.91814e-07	4.63815e-05	0.659444	2.03015	120	GO:0051250	BP
Negative Regulation Of Lymphocyte Apoptotic Process	0.00650262	0.0667847	0.407018	1.7315	33	GO:0070229	BP
Negative Regulation Of Lymphocyte Differentiation	0.0134791	0.109868	0.38073	1.63326	43	GO:0045620	BP
Negative Regulation Of Lymphocyte Mediated Immunity	0.00457767	0.052647	0.407018	1.71542	40	GO:0002707	BP
Negative Regulation Of Mapk Cascade	0.00697586	0.07039	0.407018	1.56861	145	GO:0043409	BP
Negative Regulation Of Mast Cell Activation	0.00228639	0.0324508	0.431708	1.70032	9	GO:0033004	BP
Negative Regulation Of Myeloid Cell Apoptotic Process	0.035123	0.199975	0.321776	1.54307	16	GO:0033033	BP
Negative Regulation Of Myeloid Leukocyte Mediated Immunity	0.00745735	0.073531	0.407018	1.65475	9	GO:0002887	BP
Negative Regulation Of Myotube Differentiation	0.00466911	0.0534303	0.407018	1.73295	14	GO:0010832	BP
Negative Regulation Of Natural Killer Cell Activation	0.00276221	0.0367869	0.431708	1.68863	6	GO:0032815	BP
Negative Regulation Of Neural Precursor Cell Proliferation	0.00550413	0.0596336	0.407018	1.83817	31	GO:2000178	BP
Negative Regulation Of Neutrophil Activation	0.00741489	0.0732671	0.407018	1.66497	6	GO:1902564	BP
Negative Regulation Of Nitric Oxide Metabolic Process	0.00735413	0.0730692	0.407018	1.67592	13	GO:0046209	BP
Negative Regulation Of Norepinephrine Secretion	0.00613489	0.0641609	0.407018	1.59236	5	GO:0010700	BP
Negative Regulation Of Nucleotide Metabolic Process	0.0239891	0.156244	0.352488	1.60452	22	GO:0045980	BP
Negative Regulation Of Organ Growth	0.000895465	0.0165316	0.477271	-1.91291	35	GO:0046621	BP
Negative Regulation Of Peptidyl Tyrosine Phosphorylation	0.000632315	0.0128925	0.477271	1.8576	41	GO:0050732	BP
Negative Regulation Of Phagocytosis	0.00334265	0.042392	0.431708	1.70958	21	GO:0050765	BP
Negative Regulation Of Phosphorus Metabolic Process	0.00547551	0.0596011	0.407018	1.47536	308	GO:0010563	BP
Negative Regulation Of Phosphorylation	0.0150533	0.116649	0.38073	1.40361	274	GO:0042326	BP
Negative Regulation Of Plasminogen Activation	0.00644554	0.0665942	0.407018	1.6633	7	GO:0010757	BP
Negative Regulation Of Protein Autophosphorylation	0.00371035	0.0459605	0.431708	1.6843	9	GO:0031953	BP
Negative Regulation Of Protein Modification Process	0.027551	0.17138	0.276501	1.34518	345	GO:0031400	BP
Negative Regulation Of Receptor Signaling Pathway Via Stat	0.0017376	0.0266896	0.45506	1.86859	27	GO:1904893	BP
Negative Regulation Of Regulated Secretory Pathway	0.001146	0.0198686	0.45506	1.82497	23	GO:1903306	BP
Negative Regulation Of Respiratory Burst	0.0149023	0.116176	0.38073	1.54968	5	GO:0060268	BP
Negative Regulation Of Response To Biotic Stimulus	0.0117152	0.0996011	0.38073	1.65787	96	GO:0002832	BP
Negative Regulation Of Response To Cytokine Stimulus	0.0220336	0.148086	0.352488	1.59436	67	GO:0060761	BP
Negative Regulation Of Response To External Stimulus	6.20887e-05	0.00200541	0.538434	1.69234	302	GO:0032102	BP
Negative Regulation Of Secretion	0.00219601	0.0315268	0.431708	1.6711	169	GO:0051048	BP
Negative Regulation Of Small Molecule Metabolic Process	0.0187044	0.133146	0.352488	1.53041	85	GO:0062014	BP
Negative Regulation Of T Cell Apoptotic Process	0.00106179	0.0189641	0.45506	1.76574	21	GO:0070233	BP
Negative Regulation Of T Cell Mediated Cytotoxicity	0.00204117	0.0299545	0.431708	1.626	5	GO:0001915	BP
Negative Regulation Of T Cell Proliferation	0.00149437	0.0240166	0.45506	1.81052	52	GO:0042130	BP
Negative Regulation Of Tissue Remodeling	0.0101504	0.0907625	0.38073	1.69389	20	GO:0034104	BP
Negative Regulation Of Transferase Activity	0.0275716	0.17138	0.282013	1.42413	179	GO:0051338	BP
Negative Regulation Of Transforming Growth Factor Beta Production	0.0225689	0.150425	0.352488	1.58946	8	GO:0071635	BP
Negative Regulation Of Transport	0.000266552	0.00646459	0.498493	1.56691	391	GO:0051051	BP
Negative Regulation Of Triglyceride Metabolic Process	0.0142034	0.112714	0.38073	1.59214	11	GO:0090209	BP
Negative Regulation Of Tumor Necrosis Factor Superfamily Cytokine Production	0.0002711	0.00652906	0.498493	1.8826	49	GO:1903556	BP
Negative Regulation Of Vascular Associated Smooth Muscle Cell Apoptotic Process	0.0242012	0.156335	0.352488	-1.53955	5	GO:1905460	BP
Negative T Cell Selection	0.00254334	0.0350505	0.431708	1.72093	10	GO:0043383	BP
Neuroinflammatory Response	7.7155e-07	4.55808e-05	0.659444	2.10202	75	GO:0150076	BP
Neuromuscular Process	0.00129758	0.0218222	0.45506	-1.57911	183	GO:0050905	BP
Neuron Cellular Homeostasis	0.0281352	0.172558	0.352488	-1.51326	75	GO:0070050	BP
Neuron Fate Commitment	0.0104625	0.0922857	0.38073	-1.61127	62	GO:0048663	BP
Neuron Fate Determination	0.00791381	0.0770427	0.38073	-1.72536	8	GO:0048664	BP
Neuron Fate Specification	0.0164774	0.123661	0.352488	-1.63767	26	GO:0048665	BP
Neuron Maturation	0.0023723	0.0334233	0.431708	1.81404	61	GO:0042551	BP
Neuron Remodeling	0.000160919	0.00418147	0.518848	1.91143	18	GO:0016322	BP
Neuronal Action Potential	0.00966493	0.0874193	0.38073	-1.66216	51	GO:0019228	BP
Neurotransmitter Receptor Internalization	0.000745705	0.0144378	0.477271	-1.84094	48	GO:0099590	BP
Neurotransmitter Secretion	0.000328986	0.00768227	0.498493	-1.62399	170	GO:0007269	BP
Neurotransmitter Transport	0.00167812	0.0260071	0.45506	-1.46539	218	GO:0006836	BP
Neutral Lipid Biosynthetic Process	0.00336015	0.0424596	0.431708	1.83308	47	GO:0046460	BP
Neutral Lipid Metabolic Process	0.000896871	0.0165316	0.477271	1.75239	106	GO:0006638	BP
Neutrophil Activation	7.04897e-08	5.07526e-06	0.704976	2.14091	32	GO:0042119	BP
Neutrophil Activation Involved In Immune Response	3.90767e-05	0.00136413	0.557332	1.90375	14	GO:0002283	BP
Neutrophil Chemotaxis	7.15536e-07	4.26361e-05	0.659444	2.09811	65	GO:0030593	BP
Neutrophil Clearance	0.0159643	0.12166	0.352488	1.54661	5	GO:0097350	BP
Neutrophil Degranulation	3.81638e-05	0.00134586	0.557332	1.80633	11	GO:0043312	BP
Neutrophil Extravasation	0.0214702	0.146065	0.352488	1.58761	10	GO:0072672	BP
Neutrophil Homeostasis	0.00992115	0.0892903	0.38073	1.73013	26	GO:0001780	BP
Neutrophil Mediated Cytotoxicity	0.0139567	0.111268	0.38073	1.62977	7	GO:0070942	BP
Neutrophil Mediated Immunity	4.7506e-07	2.9318e-05	0.674963	2.04781	25	GO:0002446	BP
Neutrophil Mediated Killing Of Bacterium	0.0127842	0.105535	0.38073	1.55837	5	GO:0070944	BP
Neutrophil Migration	3.57305e-10	4.25809e-08	0.814036	2.20675	85	GO:1990266	BP
Non Canonical Nf Kappab Signal Transduction	4.0819e-05	0.00141071	0.557332	1.9285	106	GO:0038061	BP
Nucleophagy	0.00605764	0.0637297	0.407018	-1.72124	21	GO:0044804	BP
Nucleoside Phosphate Catabolic Process	0.0331197	0.191889	0.257206	1.413	162	GO:1901292	BP
Nucleotide Catabolic Process	0.0180808	0.130269	0.352488	1.46924	145	GO:0009166	BP
Nutrient Storage	0.000236577	0.00579865	0.518848	1.94326	79	GO:0170062	BP
Odontoblast Differentiation	0.0183269	0.131406	0.352488	1.63297	17	GO:0071895	BP
Organic Acid Transport	0.00932162	0.0856796	0.38073	1.43174	286	GO:0015849	BP
Organic Anion Transport	0.0250066	0.160142	0.352488	1.37198	346	GO:0015711	BP
Osteoclast Differentiation	0.0122217	0.102396	0.38073	1.61957	100	GO:0030316	BP
Oviduct Development	0.000401668	0.0089559	0.498493	1.72286	6	GO:0060066	BP
Ovulation	0.0280552	0.172524	0.352488	1.5941	20	GO:0030728	BP
Ovulation From Ovarian Follicle	0.00953798	0.0867454	0.38073	1.64953	12	GO:0001542	BP
Oxaloacetate Metabolic Process	0.0244962	0.15806	0.352488	-1.64565	10	GO:0006107	BP
Oxidative Phosphorylation	0.00168224	0.0260127	0.45506	-1.67175	120	GO:0006119	BP
Oxygen Metabolic Process	0.0235841	0.154662	0.352488	1.61903	6	GO:0072592	BP
P38mapk Cascade	0.0043004	0.0509852	0.407018	1.71334	56	GO:0038066	BP
Paranodal Junction Assembly	0.00790412	0.0770427	0.38073	-1.72233	6	GO:0030913	BP
Peptidyl Tyrosine Modification	1.4992e-07	1.04671e-05	0.690132	1.93889	220	GO:0018212	BP
Pericardium Morphogenesis	0.000945906	0.0172509	0.477271	-1.86686	8	GO:0003344	BP
Phagocytosis	2.47944e-12	4.17997e-10	0.898671	2.19139	173	GO:0006909	BP
Phagocytosis Engulfment	1.30632e-05	0.000547229	0.593325	2.04664	39	GO:0006911	BP
Phosphatidylethanolamine Acyl Chain Remodeling	0.0186277	0.132873	0.352488	-1.56811	5	GO:0036152	BP
Phosphatidylinositol 3 Kinase Protein Kinase B Signal Transduction	1.9472e-05	0.000769088	0.57561	1.75431	274	GO:0043491	BP
Phospholipase C Activating G Protein Coupled Receptor Signaling Pathway	0.000726025	0.014136	0.477271	1.87335	101	GO:0007200	BP
Physiological Cardiac Muscle Hypertrophy	0.000877215	0.0164764	0.477271	-1.87353	38	GO:0003301	BP
Pinocytosis	0.0287153	0.174637	0.352488	1.61143	23	GO:0006907	BP
Platelet Activation	5.20697e-05	0.00173887	0.557332	1.96667	81	GO:0030168	BP
Platelet Aggregation	0.00429215	0.0509748	0.407018	1.80754	47	GO:0070527	BP
Platelet Degranulation	0.00684111	0.0693339	0.407018	1.66768	6	GO:0002576	BP
Platelet Derived Growth Factor Receptor Alpha Signaling Pathway	0.0196286	0.138019	0.352488	1.58122	49	GO:0035790	BP
Platelet Derived Growth Factor Receptor Beta Signaling Pathway	0.0219415	0.148086	0.352488	1.5584	56	GO:0035791	BP
Platelet Morphogenesis	0.0201946	0.140559	0.352488	1.59647	21	GO:0036344	BP
Podosome Assembly	0.000783536	0.0150858	0.477271	1.776	21	GO:0071800	BP
Positive Regulation By Symbiont Of Entry Into Host	0.0182885	0.131403	0.352488	1.59828	9	GO:0075294	BP
Positive Regulation Of Acute Inflammatory Response	4.56082e-09	4.1529e-07	0.761461	1.98669	17	GO:0002675	BP
Positive Regulation Of Acute Inflammatory Response To Antigenic Stimulus	0.000115904	0.003352	0.538434	1.66914	5	GO:0002866	BP
Positive Regulation Of Adaptive Immune Response	5.56731e-08	4.20819e-06	0.719513	2.18086	89	GO:0002821	BP
Positive Regulation Of Alcohol Biosynthetic Process	0.0348598	0.199133	0.321776	1.5805	30	GO:1902932	BP
Positive Regulation Of Alpha Beta T Cell Activation	0.000901678	0.0165316	0.477271	1.83096	53	GO:0046635	BP
Positive Regulation Of Alpha Beta T Cell Differentiation	0.0176433	0.127965	0.352488	1.57068	41	GO:0046638	BP
Positive Regulation Of Alpha Beta T Cell Proliferation	0.0023072	0.0326122	0.431708	1.79976	16	GO:0046641	BP
Positive Regulation Of Apoptotic Cell Clearance	8.27889e-05	0.00257764	0.538434	1.67238	5	GO:2000427	BP
Positive Regulation Of Apoptotic Process Involved In Development	0.0168766	0.124385	0.352488	1.5409	5	GO:1904747	BP
Positive Regulation Of Apoptotic Signaling Pathway	0.0134598	0.109839	0.38073	1.51589	138	GO:2001235	BP
Positive Regulation Of Astrocyte Differentiation	0.0127039	0.105287	0.38073	1.66492	14	GO:0048711	BP
Positive Regulation Of B Cell Activation	0.00057991	0.0121452	0.477271	1.88736	72	GO:0050871	BP
Positive Regulation Of B Cell Differentiation	0.0246367	0.158556	0.352488	1.58414	15	GO:0045579	BP
Positive Regulation Of B Cell Mediated Immunity	0.000180605	0.0045895	0.518848	1.99757	31	GO:0002714	BP
Positive Regulation Of B Cell Proliferation	3.80272e-05	0.00134586	0.557332	1.95692	37	GO:0030890	BP
Positive Regulation Of Calcium Ion Transport	0.0139349	0.111268	0.38073	1.50451	108	GO:0051928	BP
Positive Regulation Of Calcium Mediated Signaling	0.0288524	0.17509	0.352488	1.54175	49	GO:0050850	BP
Positive Regulation Of Canonical Nf Kappab Signal Transduction	3.01335e-05	0.00110232	0.57561	1.89165	146	GO:0043123	BP
Positive Regulation Of Cardiac Epithelial To Mesenchymal Transition	0.0127937	0.105535	0.38073	1.62357	9	GO:0062043	BP
Positive Regulation Of Cd4 Positive Alpha Beta T Cell Activation	0.0222345	0.148919	0.352488	1.65296	31	GO:2000516	BP
Positive Regulation Of Cd4 Positive Alpha Beta T Cell Differentiation	0.0232496	0.152758	0.352488	1.63245	26	GO:0043372	BP
Positive Regulation Of Cell Activation	3.18692e-10	3.86455e-08	0.814036	1.98495	282	GO:0050867	BP
Positive Regulation Of Cell Adhesion	3.95512e-09	3.6943e-07	0.761461	1.84083	395	GO:0045785	BP
Positive Regulation Of Cell Adhesion Mediated By Integrin	0.000362118	0.00820643	0.498493	1.79714	15	GO:0033630	BP
Positive Regulation Of Cell Cell Adhesion	2.11485e-09	2.11853e-07	0.774939	2.01651	232	GO:0022409	BP
Positive Regulation Of Cell Development	3.87952e-05	0.00136118	0.557332	1.62126	452	GO:0010720	BP
Positive Regulation Of Cell Killing	6.10503e-05	0.00199047	0.538434	1.89428	36	GO:0031343	BP
Positive Regulation Of Cellular Component Biogenesis	0.00439409	0.0514778	0.407018	1.41155	477	GO:0044089	BP
Positive Regulation Of Cellular Extravasation	0.00903176	0.0845901	0.38073	1.72332	18	GO:0002693	BP
Positive Regulation Of Chemokine Production	3.48087e-05	0.00125311	0.557332	2.00854	55	GO:0032722	BP
Positive Regulation Of Chemotaxis	7.6247e-08	5.43319e-06	0.704976	2.07838	120	GO:0050921	BP
Positive Regulation Of Coagulation	0.00221749	0.031683	0.431708	1.79445	23	GO:0050820	BP
Positive Regulation Of Cytokine Production	4.28471e-18	1.851e-15	1.09593	2.12919	361	GO:0001819	BP
Positive Regulation Of Cytokine Production Involved In Immune Response	0.000268089	0.00647912	0.498493	1.91917	63	GO:0002720	BP
Positive Regulation Of Cytokine Production Involved In Inflammatory Response	0.0055316	0.0596336	0.407018	1.68259	21	GO:1900017	BP
Positive Regulation Of Cytoskeleton Organization	0.0229206	0.151634	0.352488	1.47888	171	GO:0051495	BP
Positive Regulation Of Cytosolic Calcium Ion Concentration	0.000121209	0.00346197	0.538434	1.87658	126	GO:0007204	BP
Positive Regulation Of D Glucose Transmembrane Transport	0.00127823	0.0216157	0.45506	1.77124	42	GO:0010828	BP
Positive Regulation Of Defense Response	7.72791e-19	4.45127e-16	1.12391	2.12191	396	GO:0031349	BP
Positive Regulation Of Developmental Growth	0.0295983	0.17759	0.271289	1.41957	184	GO:0048639	BP
Positive Regulation Of Dna Binding Transcription Factor Activity	0.00416624	0.0502566	0.407018	1.62805	171	GO:0051091	BP
Positive Regulation Of Endocytosis	4.30149e-06	0.000212371	0.610527	1.92087	156	GO:0045807	BP
Positive Regulation Of Endothelial Cell Migration	0.00755332	0.0741598	0.407018	1.66624	109	GO:0010595	BP
Positive Regulation Of Endothelial Cell Proliferation	0.0247023	0.158683	0.352488	1.56058	82	GO:0001938	BP
Positive Regulation Of Epithelial Cell Proliferation	0.0295359	0.177523	0.271289	1.42061	188	GO:0050679	BP
Positive Regulation Of Epithelial To Mesenchymal Transition	0.0051719	0.0573124	0.407018	1.74453	50	GO:0010718	BP
Positive Regulation Of Erk1 And Erk2 Cascade	1.54075e-07	1.06497e-05	0.690132	2.02271	171	GO:0070374	BP
Positive Regulation Of Excitatory Postsynaptic Potential	0.0120972	0.101723	0.38073	-1.6024	42	GO:2000463	BP
Positive Regulation Of Fatty Acid Biosynthetic Process	0.0285348	0.17408	0.352488	1.59343	20	GO:0045723	BP
Positive Regulation Of Fatty Acid Transport	0.00166046	0.0258494	0.45506	1.88013	20	GO:2000193	BP
Positive Regulation Of Fc Receptor Mediated Stimulatory Signaling Pathway	0.0247416	0.158788	0.352488	1.61536	6	GO:0060369	BP
Positive Regulation Of Fever Generation	0.000136508	0.00371856	0.518848	1.73766	6	GO:0031622	BP
Positive Regulation Of Fibroblast Proliferation	0.0147953	0.115685	0.38073	1.58836	66	GO:0048146	BP
Positive Regulation Of G Protein Coupled Receptor Signaling Pathway	0.0104627	0.0922857	0.38073	1.74887	32	GO:0045745	BP
Positive Regulation Of Gamma Delta T Cell Activation	0.00945763	0.0863555	0.38073	1.65488	10	GO:0046645	BP
Positive Regulation Of Glial Cell Differentiation	0.00413382	0.0499527	0.407018	1.71626	49	GO:0045687	BP
Positive Regulation Of Glial Cell Proliferation	0.00160291	0.0251802	0.45506	1.87234	27	GO:0060252	BP
Positive Regulation Of Gliogenesis	0.00269229	0.0364502	0.431708	1.78447	80	GO:0014015	BP
Positive Regulation Of Gonad Development	0.00604259	0.0636682	0.407018	-1.75024	8	GO:1905941	BP
Positive Regulation Of Granulocyte Chemotaxis	1.36988e-05	0.000570396	0.593325	1.98292	25	GO:0071624	BP
Positive Regulation Of Granulocyte Differentiation	0.00262511	0.0358663	0.431708	1.69633	9	GO:0030854	BP
Positive Regulation Of Granulocyte Macrophage Colony Stimulating Factor Production	0.00215036	0.03116	0.431708	1.7103	8	GO:0032725	BP
Positive Regulation Of Growth	0.00512955	0.0571862	0.407018	1.48611	261	GO:0045927	BP
Positive Regulation Of Gtpase Activity	0.0220951	0.148273	0.352488	1.48479	132	GO:0043547	BP
Positive Regulation Of Heat Generation	0.00128218	0.0216157	0.45506	1.74956	10	GO:0031652	BP
Positive Regulation Of Hemopoiesis	2.30386e-06	0.000119731	0.627257	1.94497	161	GO:1903708	BP
Positive Regulation Of Hemostasis	0.000706031	0.0139058	0.477271	1.80192	19	GO:1900048	BP
Positive Regulation Of Heterotypic Cell Cell Adhesion	0.0069924	0.070454	0.407018	1.66356	8	GO:0034116	BP
Positive Regulation Of Humoral Immune Response	0.000732469	0.0142214	0.477271	1.72444	7	GO:0002922	BP
Positive Regulation Of Hydrolase Activity	0.0192304	0.13605	0.352488	1.52063	187	GO:0051345	BP
Positive Regulation Of Icosanoid Secretion	0.000571145	0.0120944	0.477271	1.86876	16	GO:0032305	BP
Positive Regulation Of Immature T Cell Proliferation	0.0146136	0.114835	0.38073	1.64245	6	GO:0033091	BP
Positive Regulation Of Immune Effector Process	5.89076e-13	1.19756e-10	0.921426	2.20409	182	GO:0002699	BP
Positive Regulation Of Immunoglobulin Production	0.00015692	0.00409633	0.518848	1.90253	40	GO:0002639	BP
Positive Regulation Of Inflammasome Mediated Signaling Pathway	0.0302077	0.180151	0.352488	1.65389	24	GO:0141087	BP
Positive Regulation Of Inflammatory Response	1.68925e-15	5.07657e-13	1.01754	2.3379	107	GO:0050729	BP
Positive Regulation Of Inflammatory Response To Antigenic Stimulus	0.000103181	0.00307407	0.538434	1.75174	7	GO:0002863	BP
Positive Regulation Of Inositol Trisphosphate Biosynthetic Process	0.0150536	0.116649	0.38073	1.54961	5	GO:0032962	BP
Positive Regulation Of Integrin Activation	0.000235716	0.00579812	0.518848	1.75755	9	GO:0033625	BP
Positive Regulation Of Interferon Alpha Production	0.0315168	0.185399	0.321776	1.60299	23	GO:0032727	BP
Positive Regulation Of Interferon Beta Production	0.00590359	0.0625853	0.407018	1.66793	41	GO:0032728	BP
Positive Regulation Of Interleukin 1 Beta Production	0.0112855	0.097022	0.38073	1.73898	45	GO:0032731	BP
Positive Regulation Of Interleukin 1 Production	0.00118844	0.020333	0.45506	1.82357	52	GO:0032732	BP
Positive Regulation Of Interleukin 10 Production	0.00969765	0.0875067	0.38073	1.76121	31	GO:0032733	BP
Positive Regulation Of Interleukin 12 Production	0.00608834	0.0638583	0.407018	1.82708	30	GO:0032735	BP
Positive Regulation Of Interleukin 18 Production	0.00334867	0.042392	0.431708	1.69165	7	GO:0032741	BP
Positive Regulation Of Interleukin 2 Production	0.00831186	0.0795728	0.38073	1.76962	30	GO:0032743	BP
Positive Regulation Of Interleukin 4 Production	0.00262563	0.0358663	0.431708	1.72032	15	GO:0032753	BP
Positive Regulation Of Interleukin 6 Production	4.77885e-08	3.7114e-06	0.719513	2.13205	87	GO:0032755	BP
Positive Regulation Of Interleukin 8 Production	0.000499591	0.0107576	0.477271	1.96075	44	GO:0032757	BP
Positive Regulation Of Isotype Switching	0.0193893	0.136754	0.352488	1.69923	24	GO:0045830	BP
Positive Regulation Of Isotype Switching To Igg Isotypes	0.0116527	0.0991916	0.38073	1.63763	8	GO:0048304	BP
Positive Regulation Of Jnk Cascade	0.02674	0.167416	0.352488	1.57824	89	GO:0046330	BP
Positive Regulation Of Kinase Activity	0.00926294	0.0855955	0.38073	1.48182	238	GO:0033674	BP
Positive Regulation Of Lamellipodium Assembly	0.0291914	0.17622	0.352488	1.60494	28	GO:0010592	BP
Positive Regulation Of Lamellipodium Organization	0.0077714	0.0760848	0.407018	1.65982	34	GO:1902745	BP
Positive Regulation Of Leukocyte Adhesion To Vascular Endothelial Cell	0.000388136	0.00873876	0.498493	1.83009	19	GO:1904996	BP
Positive Regulation Of Leukocyte Cell Cell Adhesion	8.66004e-10	9.20895e-08	0.801216	2.07624	189	GO:1903039	BP
Positive Regulation Of Leukocyte Chemotaxis	1.96056e-07	1.31567e-05	0.690132	2.1315	75	GO:0002690	BP
Positive Regulation Of Leukocyte Degranulation	0.0107597	0.0941517	0.38073	1.71483	22	GO:0043302	BP
Positive Regulation Of Leukocyte Mediated Immunity	2.07758e-09	2.1118e-07	0.774939	2.19345	93	GO:0002705	BP
Positive Regulation Of Leukocyte Migration	1.57256e-12	2.78707e-10	0.91012	2.23101	126	GO:0002687	BP
Positive Regulation Of Leukocyte Proliferation	4.07105e-10	4.76934e-08	0.814036	2.16468	118	GO:0070665	BP
Positive Regulation Of Leukocyte Tethering Or Rolling	0.000281607	0.00666598	0.498493	1.7537	9	GO:1903238	BP
Positive Regulation Of Lipid Localization	1.53235e-06	8.47326e-05	0.643552	2.0926	86	GO:1905954	BP
Positive Regulation Of Lipid Storage	0.000104451	0.00309653	0.538434	1.85356	17	GO:0010884	BP
Positive Regulation Of Lipid Transport	0.00510397	0.0570852	0.407018	1.78211	71	GO:0032370	BP
Positive Regulation Of Lymphocyte Activation	6.05614e-08	4.50108e-06	0.704976	1.95064	239	GO:0051251	BP
Positive Regulation Of Lymphocyte Differentiation	0.00105301	0.018856	0.45506	1.77008	108	GO:0045621	BP
Positive Regulation Of Lymphocyte Migration	0.00276188	0.0367869	0.431708	1.74767	34	GO:2000403	BP
Positive Regulation Of Macrophage Chemotaxis	0.00806916	0.0780056	0.38073	1.68572	16	GO:0010759	BP
Positive Regulation Of Macrophage Cytokine Production	0.0241353	0.156244	0.352488	1.6295	26	GO:0060907	BP
Positive Regulation Of Macrophage Derived Foam Cell Differentiation	0.00478846	0.0542588	0.407018	1.66734	11	GO:0010744	BP
Positive Regulation Of Macrophage Migration	0.00687921	0.069618	0.407018	1.76075	22	GO:1905523	BP
Positive Regulation Of Male Gonad Development	0.0171201	0.125222	0.352488	-1.64488	6	GO:2000020	BP
Positive Regulation Of Map Kinase Activity	0.00199819	0.0293862	0.431708	1.73373	88	GO:0043406	BP
Positive Regulation Of Mapk Cascade	2.76973e-09	2.65894e-07	0.774939	1.82061	424	GO:0043410	BP
Positive Regulation Of Membrane Invagination	0.00115833	0.0199793	0.45506	1.77799	12	GO:1905155	BP
Positive Regulation Of Mirna Metabolic Process	0.00861049	0.0816402	0.38073	1.69669	55	GO:2000630	BP
Positive Regulation Of Mitochondrial Calcium Ion Concentration	0.0240551	0.156244	0.352488	-1.62599	7	GO:0051561	BP
Positive Regulation Of Mitochondrial Fission	0.00657402	0.0672184	0.407018	-1.74977	22	GO:0090141	BP
Positive Regulation Of Monocyte Chemotactic Protein 1 Production	0.0126061	0.104854	0.38073	1.62069	12	GO:0071639	BP
Positive Regulation Of Monocyte Chemotaxis	0.0033351	0.0423754	0.431708	1.75075	14	GO:0090026	BP
Positive Regulation Of Monocyte Differentiation	0.0111517	0.095991	0.38073	1.63258	9	GO:0045657	BP
Positive Regulation Of Mononuclear Cell Migration	2.05391e-05	0.000797562	0.57561	2.00434	76	GO:0071677	BP
Positive Regulation Of Monooxygenase Activity	0.00619484	0.0645834	0.407018	1.64625	11	GO:0004497	BP
Positive Regulation Of Myeloid Cell Differentiation	0.000859169	0.0161814	0.477271	1.89273	92	GO:0045639	BP
Positive Regulation Of Myeloid Leukocyte Cytokine Production Involved In Immune Response	0.00523436	0.0575977	0.407018	1.77474	35	GO:0061081	BP
Positive Regulation Of Myeloid Leukocyte Differentiation	0.000344429	0.00790928	0.498493	1.89467	56	GO:0002763	BP
Positive Regulation Of Myeloid Leukocyte Mediated Immunity	1.84228e-08	1.5342e-06	0.733762	1.93965	15	GO:0002888	BP
Positive Regulation Of Myoblast Fusion	0.0277607	0.171429	0.352488	1.56444	10	GO:1901741	BP
Positive Regulation Of Neurogenesis	0.0350154	0.199692	0.245042	1.34186	282	GO:0050769	BP
Positive Regulation Of Neuroinflammatory Response	0.0214702	0.146065	0.352488	1.58763	10	GO:0150078	BP
Positive Regulation Of Neuron Apoptotic Process	0.0128058	0.105535	0.38073	1.62126	83	GO:0043525	BP
Positive Regulation Of Neutrophil Migration	1.76408e-06	9.60103e-05	0.643552	2.06099	35	GO:1902624	BP
Positive Regulation Of Nf Kappab Transcription Factor Activity	0.00435077	0.0512308	0.407018	1.74689	99	GO:0051092	BP
Positive Regulation Of Nitric Oxide Metabolic Process	0.0017193	0.0264672	0.45506	1.7868	37	GO:0046209	BP
Positive Regulation Of Non Canonical Nf Kappab Signal Transduction	0.00458863	0.0526854	0.407018	1.79159	59	GO:1901224	BP
Positive Regulation Of Organic Acid Transport	0.0119568	0.101095	0.38073	1.72104	48	GO:0032892	BP
Positive Regulation Of P38mapk Cascade	0.00750941	0.0738336	0.407018	1.75081	26	GO:1900745	BP
Positive Regulation Of Pattern Recognition Receptor Signaling Pathway	0.00049472	0.0106859	0.477271	1.85086	70	GO:0062208	BP
Positive Regulation Of Peptidase Activity	0.0119641	0.101095	0.38073	1.67787	23	GO:0010952	BP
Positive Regulation Of Peptidyl Tyrosine Phosphorylation	0.000911593	0.0166691	0.477271	1.83117	112	GO:0050731	BP
Positive Regulation Of Phagocytosis	1.0396e-05	0.000454792	0.593325	2.03217	54	GO:0050766	BP
Positive Regulation Of Phosphatase Activity	0.0168207	0.124385	0.352488	1.60699	10	GO:0010922	BP
Positive Regulation Of Phosphatidylinositol 3 Kinase Protein Kinase B Signal Transduction	0.00011583	0.003352	0.538434	1.83693	160	GO:0051897	BP
Positive Regulation Of Phospholipase Activity	0.0127406	0.105465	0.38073	-1.68952	7	GO:0010518	BP
Positive Regulation Of Plasma Membrane Bounded Cell Projection Assembly	0.030104	0.179688	0.352488	1.49459	99	GO:0120034	BP
Positive Regulation Of Platelet Activation	0.00800899	0.0776412	0.38073	1.62654	11	GO:0010572	BP
Positive Regulation Of Production Of Molecular Mediator Of Immune Response	9.62887e-07	5.59284e-05	0.643552	2.09009	100	GO:0002702	BP
Positive Regulation Of Prostaglandin Biosynthetic Process	0.00215036	0.03116	0.431708	1.71285	8	GO:0031394	BP
Positive Regulation Of Protein Containing Complex Assembly	0.000137803	0.0037258	0.518848	1.77251	185	GO:0031334	BP
Positive Regulation Of Protein Exit From Endoplasmic Reticulum	0.0202135	0.140559	0.352488	1.59144	9	GO:0070863	BP
Positive Regulation Of Protein Import Into Nucleus	0.0300693	0.179636	0.352488	1.5644	47	GO:0042307	BP
Positive Regulation Of Protein Serine Threonine Kinase Activity	0.0114122	0.0976249	0.38073	1.56663	127	GO:0071902	BP
Positive Regulation Of Pyroptotic Inflammatory Response	0.0174847	0.127081	0.352488	1.53803	5	GO:0140639	BP
Positive Regulation Of Reactive Oxygen Species Metabolic Process	0.00116611	0.0200003	0.45506	1.799	58	GO:2000379	BP
Positive Regulation Of Receptor Mediated Endocytosis	0.00428409	0.0509666	0.407018	1.75704	55	GO:0048260	BP
Positive Regulation Of Receptor Signaling Pathway Via Stat	0.0117944	0.100124	0.38073	1.61968	34	GO:1904894	BP
Positive Regulation Of Regulated Secretory Pathway	0.0238494	0.156244	0.352488	1.55345	53	GO:1903307	BP
Positive Regulation Of Release Of Sequestered Calcium Ion Into Cytosol	0.0139195	0.111268	0.38073	1.6067	34	GO:0051281	BP
Positive Regulation Of Response To Biotic Stimulus	2.14574e-09	2.11876e-07	0.774939	1.9052	323	GO:0002833	BP
Positive Regulation Of Response To Cytokine Stimulus	0.00160886	0.0252164	0.45506	1.80866	54	GO:0060760	BP
Positive Regulation Of Response To Oxidative Stress	0.022654	0.150573	0.352488	1.52581	5	GO:1902884	BP
Positive Regulation Of Response To Wounding	0.000976171	0.0176631	0.477271	1.81696	60	GO:1903036	BP
Positive Regulation Of Secretion	0.0164659	0.123661	0.352488	1.37486	323	GO:0051047	BP
Positive Regulation Of Smad Protein Signal Transduction	0.0164696	0.123661	0.352488	1.61203	33	GO:0060391	BP
Positive Regulation Of Small Gtpase Mediated Signal Transduction	0.0252448	0.161119	0.352488	1.52969	65	GO:0051057	BP
Positive Regulation Of Small Molecule Metabolic Process	0.0171035	0.125222	0.352488	1.53289	146	GO:0062013	BP
Positive Regulation Of Smooth Muscle Cell Differentiation	0.0137669	0.111071	0.38073	1.70109	18	GO:0051152	BP
Positive Regulation Of Smooth Muscle Cell Proliferation	0.00408912	0.0494991	0.407018	1.63083	106	GO:0048661	BP
Positive Regulation Of Smooth Muscle Contraction	0.0307779	0.182606	0.352488	1.60748	26	GO:0045987	BP
Positive Regulation Of Syncytium Formation By Plasma Membrane Fusion	0.01468	0.115043	0.38073	1.62173	15	GO:0060143	BP
Positive Regulation Of T Cell Cytokine Production	0.00818315	0.0786675	0.38073	1.727	18	GO:0002726	BP
Positive Regulation Of T Cell Mediated Immunity	0.00102374	0.0183795	0.45506	1.77099	38	GO:0002711	BP
Positive Regulation Of T Cell Migration	0.0032473	0.0416426	0.431708	1.73539	29	GO:2000406	BP
Positive Regulation Of T Cell Proliferation	8.1878e-06	0.000369896	0.593325	2.05169	71	GO:0042102	BP
Positive Regulation Of T Helper 1 Type Immune Response	6.55805e-05	0.00208891	0.538434	1.78147	9	GO:0002827	BP
Positive Regulation Of T Helper 17 Cell Differentiation	0.0141633	0.112525	0.38073	1.61707	9	GO:2000321	BP
Positive Regulation Of T Helper 17 Type Immune Response	0.0051773	0.0573124	0.407018	1.7241	14	GO:2000318	BP
Positive Regulation Of Toll Like Receptor 2 Signaling Pathway	0.0240235	0.156244	0.352488	1.60065	7	GO:0034137	BP
Positive Regulation Of Transferase Activity	0.0132143	0.108219	0.38073	1.43434	276	GO:0051338	BP
Positive Regulation Of Transmembrane Transport	0.0203086	0.140815	0.352488	1.44939	198	GO:0034764	BP
Positive Regulation Of Tumor Necrosis Factor Superfamily Cytokine Production	1.41388e-08	1.22159e-06	0.74774	2.16798	93	GO:1903557	BP
Positive Regulation Of Type I Interferon Production	0.00551547	0.0596336	0.407018	1.69412	74	GO:0032481	BP
Positive Regulation Of Type Ii Interferon Production	4.04952e-05	0.00140655	0.557332	2.03147	50	GO:0032729	BP
Positive Regulation Of Tyrosine Phosphorylation Of Stat Protein	0.0160674	0.122176	0.352488	1.68129	30	GO:0042531	BP
Positive Regulation Of Unsaturated Fatty Acid Biosynthetic Process	0.0277607	0.171429	0.352488	1.56308	10	GO:2001280	BP
Positive Regulation Of Vascular Endothelial Growth Factor Production	1.05514e-06	6.02738e-05	0.643552	1.9729	21	GO:0010575	BP
Positive Regulation Of Vascular Permeability	0.0238838	0.156244	0.352488	1.59501	19	GO:0043117	BP
Positive Regulation Of Vasculature Development	5.45674e-11	7.39548e-09	0.851339	2.14745	151	GO:1904018	BP
Positive Regulation Of Wound Healing	0.00959022	0.0868967	0.38073	1.77693	45	GO:0090303	BP
Positive T Cell Selection	0.0014561	0.0236813	0.45506	1.92337	32	GO:0043368	BP
Positive Thymic T Cell Selection	0.00239414	0.0336348	0.431708	1.74478	12	GO:0045059	BP
Potassium Ion Transmembrane Transport	0.00361951	0.0451997	0.431708	-1.46686	180	GO:0071805	BP
Potassium Ion Transport	0.0158678	0.121191	0.352488	-1.30045	209	GO:0006813	BP
Presynaptic Cytoskeleton Organization	0.029134	0.17622	0.352488	-1.60971	8	GO:0099187	BP
Process Utilizing Autophagic Mechanism	0.0313131	0.184515	0.257206	1.28378	479	GO:0061919	BP
Production Of Molecular Mediator Involved In Inflammatory Response	1.19187e-05	0.00050853	0.593325	2.02791	82	GO:0002532	BP
Production Of Molecular Mediator Of Immune Response	2.09345e-08	1.72261e-06	0.733762	2.02231	201	GO:0002440	BP
Progesterone Metabolic Process	0.0207227	0.142381	0.352488	-1.66352	12	GO:0042448	BP
Programmed Cell Death Involved In Cell Development	0.0185532	0.132479	0.352488	1.64262	22	GO:0010623	BP
Programmed Necrotic Cell Death	0.0344371	0.197207	0.282013	1.51632	47	GO:0097300	BP
Prostaglandin Secretion	0.000357451	0.00815414	0.498493	1.81943	17	GO:0032310	BP
Prostaglandin Transport	0.000199114	0.00500465	0.518848	1.90235	23	GO:0015732	BP
Prostanoid Biosynthetic Process	0.00010483	0.00309653	0.538434	1.98589	27	GO:0046457	BP
Prostanoid Metabolic Process	0.000581604	0.0121452	0.477271	1.9536	45	GO:0006692	BP
Protein Autophosphorylation	0.0107546	0.0941517	0.38073	1.52714	176	GO:0046777	BP
Protein Containing Complex Localization	0.00157173	0.0247772	0.45506	-1.40376	250	GO:0031503	BP
Protein Localization To Golgi Membrane	0.0162809	0.123257	0.352488	-1.58344	5	GO:1903292	BP
Protein Localization To Postsynapse	0.0325658	0.189405	0.321776	-1.48936	75	GO:0062237	BP
Protein Localization To Synapse	0.00212039	0.030855	0.431708	-1.69417	106	GO:0035418	BP
Proton Motive Force Driven Atp Synthesis	2.67354e-05	0.00100432	0.57561	-2.01267	61	GO:0015986	BP
Proton Transmembrane Transport	0.00072591	0.014136	0.477271	-1.67791	117	GO:1902600	BP
Purine Deoxyribonucleoside Monophosphate Catabolic Process	0.0211495	0.144167	0.352488	1.59613	8	GO:0009172	BP
Purine Deoxyribonucleotide Catabolic Process	0.0169087	0.124385	0.352488	1.57397	11	GO:0009155	BP
Purine Nucleoside Monophosphate Catabolic Process	0.0198878	0.13917	0.352488	1.63335	14	GO:0009128	BP
Purinergic Nucleotide Receptor Signaling Pathway	0.00919035	0.0853813	0.38073	1.78321	24	GO:0035590	BP
Pyridine Containing Compound Catabolic Process	0.0196862	0.138284	0.352488	1.55722	100	GO:0072526	BP
Pyridine Containing Compound Metabolic Process	0.0216384	0.146776	0.352488	1.43383	167	GO:0072524	BP
Pyroptotic Inflammatory Response	0.0101751	0.090866	0.38073	1.70063	27	GO:0070269	BP
Rac Protein Signal Transduction	0.0216976	0.146889	0.352488	1.57786	52	GO:0016601	BP
Reactive Nitrogen Species Metabolic Process	0.00014831	0.00392766	0.518848	1.93768	75	GO:2001057	BP
Reactive Oxygen Species Metabolic Process	0.000292033	0.00688919	0.498493	1.7621	191	GO:0072593	BP
Receptor Mediated Endocytosis	0.00492366	0.0554273	0.407018	1.53266	237	GO:0006898	BP
Regeneration	0.0152935	0.118243	0.38073	1.47546	181	GO:0031099	BP
Regulated Exocytosis	0.000693823	0.0138205	0.477271	1.63623	227	GO:0045055	BP
Regulation Of Actin Filament Based Process	0.000331787	0.0077216	0.498493	1.57846	361	GO:0032970	BP
Regulation Of Actin Filament Length	0.0125618	0.104611	0.38073	1.56562	146	GO:0030832	BP
Regulation Of Actin Filament Organization	0.0049908	0.0559099	0.407018	1.47543	245	GO:0110053	BP
Regulation Of Acute Inflammatory Response	4.64335e-08	3.64714e-06	0.719513	2.12853	30	GO:0002673	BP
Regulation Of Acute Inflammatory Response To Antigenic Stimulus	1.89881e-05	0.000754287	0.57561	1.81436	11	GO:0002864	BP
Regulation Of Adaptive Immune Response	8.83765e-11	1.15256e-08	0.839089	2.16266	149	GO:0002819	BP
Regulation Of Alcohol Biosynthetic Process	0.00855531	0.0813402	0.38073	1.68915	50	GO:1902930	BP
Regulation Of Alpha Beta T Cell Activation	1.54074e-05	0.000630152	0.57561	1.9711	85	GO:0046634	BP
Regulation Of Alpha Beta T Cell Differentiation	0.000649119	0.0131575	0.477271	1.84389	58	GO:0046637	BP
Regulation Of Amino Acid Transmembrane Transport	0.0254929	0.162065	0.352488	-1.65076	17	GO:1903789	BP
Regulation Of Antigen Receptor Mediated Signaling Pathway	0.0169096	0.124385	0.352488	1.61214	52	GO:0050854	BP
Regulation Of Apoptotic Cell Clearance	0.00149845	0.0240166	0.45506	1.70231	6	GO:2000425	BP
Regulation Of Apoptotic Signaling Pathway	0.0254323	0.162065	0.287857	1.3464	361	GO:2001233	BP
Regulation Of B Cell Activation	1.4527e-05	0.000601262	0.593325	2.00467	107	GO:0050864	BP
Regulation Of B Cell Differentiation	0.000136649	0.00371856	0.518848	1.9021	29	GO:0045577	BP
Regulation Of B Cell Mediated Immunity	1.27569e-05	0.000537806	0.593325	2.02119	41	GO:0002712	BP
Regulation Of B Cell Proliferation	1.94754e-06	0.000103661	0.627257	2.07276	54	GO:0030888	BP
Regulation Of Biological Process Involved In Symbiotic Interaction	0.0046767	0.0534303	0.407018	1.75279	28	GO:0043903	BP
Regulation Of Biomineral Tissue Development	0.0295159	0.177523	0.287857	1.50844	87	GO:0070167	BP
Regulation Of Blood Pressure	0.0299145	0.179021	0.271289	1.41815	162	GO:0008217	BP
Regulation Of Blood Vessel Endothelial Cell Proliferation Involved In Sprouting Angiogenesis	0.0281356	0.172558	0.352488	-1.62684	12	GO:1903587	BP
Regulation Of Body Fluid Levels	2.87922e-05	0.00106995	0.57561	1.75102	256	GO:0050878	BP
Regulation Of Bone Remodeling	0.00447226	0.0519429	0.407018	1.71234	49	GO:0046850	BP
Regulation Of Calcium Ion Transmembrane Transport	0.00154887	0.0246678	0.45506	1.66588	147	GO:1903169	BP
Regulation Of Calcium Ion Transport	0.00015705	0.00409633	0.518848	1.73475	221	GO:0051924	BP
Regulation Of Calcium Mediated Signaling	0.0255036	0.162065	0.352488	1.53045	78	GO:0050848	BP
Regulation Of Carbohydrate Metabolic Process	0.0184131	0.131751	0.352488	1.51428	163	GO:0006109	BP
Regulation Of Cardiac Epithelial To Mesenchymal Transition	0.0123393	0.103006	0.38073	1.623	12	GO:0062042	BP
Regulation Of Cardiac Muscle Contraction By Calcium Ion Signaling	0.0059663	0.0631533	0.407018	-1.8144	14	GO:0010882	BP
Regulation Of Cd4 Positive Alpha Beta T Cell Activation	0.000660607	0.0133338	0.477271	1.8397	58	GO:2000514	BP
Regulation Of Cd4 Positive Alpha Beta T Cell Differentiation	0.00364239	0.0451997	0.431708	1.83788	43	GO:0043370	BP
Regulation Of Cd8 Positive Alpha Beta T Cell Differentiation	0.0293716	0.177152	0.352488	1.60684	6	GO:0043376	BP
Regulation Of Cell Activation	2.40002e-18	1.27607e-15	1.10534	2.03806	473	GO:0050865	BP
Regulation Of Cell Adhesion Mediated By Integrin	2.59621e-05	0.0009806	0.57561	1.97002	40	GO:0033628	BP
Regulation Of Cell Cell Adhesion	1.41736e-12	2.64606e-10	0.91012	1.9861	372	GO:0022407	BP
Regulation Of Cell Cell Adhesion Mediated By Integrin	0.00967531	0.0874193	0.38073	1.64873	8	GO:0033632	BP
Regulation Of Cell Growth Involved In Cardiac Muscle Cell Development	0.000706154	0.0139058	0.477271	-1.91949	26	GO:0061050	BP
Regulation Of Cell Killing	9.9714e-06	0.000438996	0.593325	2.02683	62	GO:0031341	BP
Regulation Of Cell Projection Assembly	0.0208638	0.142924	0.352488	1.45418	182	GO:0060491	BP
Regulation Of Cell Shape	0.0245293	0.15806	0.352488	1.51234	129	GO:0008360	BP
Regulation Of Cellular Component Size	0.0203626	0.140815	0.352488	1.38133	363	GO:0032535	BP
Regulation Of Cellular Extravasation	0.00284286	0.0375884	0.431708	1.88454	31	GO:0002691	BP
Regulation Of Chemotaxis	6.65163e-08	4.83959e-06	0.704976	2.03473	176	GO:0050920	BP
Regulation Of Coagulation	0.00453539	0.0524224	0.407018	1.71324	53	GO:0050818	BP
Regulation Of Collagen Metabolic Process	0.028401	0.17357	0.352488	1.58207	48	GO:0010712	BP
Regulation Of Complement Activation	4.7789e-05	0.00162718	0.557332	1.83788	13	GO:0030449	BP
Regulation Of Cytokine Production Involved In Immune Response	9.399e-05	0.0028746	0.538434	1.98681	92	GO:0002718	BP
Regulation Of Cytoplasmic Pattern Recognition Receptor Signaling Pathway	0.0221401	0.148431	0.352488	1.53551	107	GO:0039531	BP
Regulation Of Cytoskeleton Organization	0.00431897	0.0511177	0.407018	1.39814	483	GO:0051493	BP
Regulation Of D Glucose Transmembrane Transport	0.000455032	0.00995311	0.498493	1.84041	68	GO:0010827	BP
Regulation Of Defense Response To Virus	0.0110351	0.0955734	0.38073	1.63719	49	GO:0050688	BP
Regulation Of Defense Response To Virus By Host	0.012901	0.106157	0.38073	1.61966	29	GO:0050691	BP
Regulation Of Dendritic Cell Differentiation	0.000460539	0.0100418	0.498493	1.73103	7	GO:2001198	BP
Regulation Of Dna Binding Transcription Factor Activity	0.000439236	0.00969968	0.498493	1.64828	284	GO:0051090	BP
Regulation Of Dopamine Receptor Signaling Pathway	0.00940682	0.0863479	0.38073	-1.7601	10	GO:0060159	BP
Regulation Of Endocytosis	1.18045e-05	0.000506787	0.593325	1.75357	292	GO:0030100	BP
Regulation Of Endopeptidase Activity	0.00660835	0.0673701	0.407018	1.67091	36	GO:0052548	BP
Regulation Of Endothelial Cell Development	0.00391957	0.0477814	0.407018	1.73179	17	GO:1901550	BP
Regulation Of Endothelial Cell Differentiation	0.000887022	0.0165316	0.477271	1.91827	39	GO:0045601	BP
Regulation Of Endothelial Cell Migration	0.010789	0.0941875	0.38073	1.5495	162	GO:0010594	BP
Regulation Of Epithelial Cell Differentiation	0.00134067	0.0223834	0.45506	1.75002	137	GO:0030856	BP
Regulation Of Epithelial To Mesenchymal Transition Involved In Endocardial Cushion Formation	0.0146136	0.114835	0.38073	1.64111	6	GO:1905005	BP
Regulation Of Exocytosis	0.0100001	0.089884	0.38073	1.52531	193	GO:0017157	BP
Regulation Of Extrinsic Apoptotic Signaling Pathway	0.0227897	0.151173	0.352488	1.46489	138	GO:2001236	BP
Regulation Of Fatty Acid Biosynthetic Process	0.0169186	0.124385	0.352488	1.58167	38	GO:0042304	BP
Regulation Of Fatty Acid Metabolic Process	0.0183481	0.131422	0.352488	1.53109	85	GO:0019217	BP
Regulation Of Fatty Acid Transport	0.00318556	0.0410029	0.431708	1.87082	32	GO:2000191	BP
Regulation Of Fc Receptor Mediated Stimulatory Signaling Pathway	0.0118057	0.100124	0.38073	1.62997	12	GO:0060368	BP
Regulation Of Fever Generation	0.000142489	0.00380263	0.518848	1.76924	8	GO:0031620	BP
Regulation Of Fibroblast Proliferation	0.00307214	0.0401411	0.431708	1.64965	106	GO:0048145	BP
Regulation Of Gamma Delta T Cell Activation	0.00793723	0.0771091	0.38073	1.66161	12	GO:0046643	BP
Regulation Of Glial Cell Differentiation	0.0190606	0.135264	0.352488	1.5283	85	GO:0045685	BP
Regulation Of Glial Cell Proliferation	0.0193323	0.136491	0.352488	1.59723	50	GO:0060251	BP
Regulation Of Gliogenesis	0.0138525	0.111268	0.38073	1.54803	121	GO:0014013	BP
Regulation Of Gonad Development	0.0281356	0.172558	0.352488	-1.62619	12	GO:1905939	BP
Regulation Of Granulocyte Chemotaxis	9.2103e-05	0.0028294	0.538434	1.93882	46	GO:0071622	BP
Regulation Of Granulocyte Differentiation	0.00899438	0.0843543	0.38073	1.69165	17	GO:0030852	BP
Regulation Of Heart Growth	0.0154313	0.118909	0.38073	-1.57513	70	GO:0060420	BP
Regulation Of Heat Generation	0.000607415	0.0124954	0.477271	1.78557	13	GO:0031650	BP
Regulation Of Hemopoiesis	4.7344e-10	5.27809e-08	0.801216	1.92632	342	GO:1903706	BP
Regulation Of Heterotypic Cell Cell Adhesion	0.0310801	0.183298	0.352488	1.55497	16	GO:0034114	BP
Regulation Of Humoral Immune Response	7.03797e-06	0.00032431	0.610527	1.98898	23	GO:0002920	BP
Regulation Of Hydrolase Activity	0.0031499	0.040925	0.431708	1.52316	310	GO:0051336	BP
Regulation Of Hypersensitivity	0.000205412	0.00510722	0.518848	1.66274	5	GO:0002883	BP
Regulation Of Icosanoid Secretion	0.00268904	0.0364502	0.431708	1.84779	20	GO:0032303	BP
Regulation Of Immature T Cell Proliferation	0.0032772	0.0417164	0.431708	1.72295	13	GO:0033083	BP
Regulation Of Immune Effector Process	4.2303e-21	4.8733e-18	1.18665	2.24396	283	GO:0002697	BP
Regulation Of Immunoglobulin Production	0.000176457	0.00450062	0.518848	1.94109	55	GO:0002637	BP
Regulation Of Inflammatory Response	1.32664e-19	9.16974e-17	1.14219	2.21642	277	GO:0050727	BP
Regulation Of Inflammatory Response To Antigenic Stimulus	0.0028066	0.0372346	0.431708	1.84099	20	GO:0002861	BP
Regulation Of Inflammatory Response To Wounding	0.00561655	0.0600024	0.407018	1.66933	9	GO:0106014	BP
Regulation Of Innate Immune Response	1.45472e-12	2.64606e-10	0.91012	1.99075	362	GO:0045088	BP
Regulation Of Inositol Phosphate Biosynthetic Process	0.00226375	0.0322	0.431708	1.73748	13	GO:0010919	BP
Regulation Of Integrin Activation	0.000138724	0.00373097	0.518848	1.81828	13	GO:0033623	BP
Regulation Of Interleukin 1 Mediated Signaling Pathway	0.0106662	0.0937972	0.38073	1.56453	5	GO:2000659	BP
Regulation Of Interleukin 18 Production	0.00868881	0.0820452	0.38073	1.64385	9	GO:0032661	BP
Regulation Of Interleukin 4 Mediated Signaling Pathway	0.000598002	0.0123754	0.477271	1.64894	5	GO:1902214	BP
Regulation Of Interleukin 4 Production	0.00908193	0.0848301	0.38073	1.70775	20	GO:0032673	BP
Regulation Of Isotype Switching	0.00652668	0.0668332	0.407018	1.69313	29	GO:0045191	BP
Regulation Of Jnk Cascade	0.0287402	0.174637	0.352488	1.48444	134	GO:0046328	BP
Regulation Of Kinase Activity	0.00524146	0.0575977	0.407018	1.41014	417	GO:0043549	BP
Regulation Of Lamellipodium Assembly	0.0297271	0.178054	0.352488	1.53267	38	GO:0010591	BP
Regulation Of Lamellipodium Organization	0.0264149	0.165982	0.352488	1.59044	48	GO:1902743	BP
Regulation Of Leukocyte Adhesion To Vascular Endothelial Cell	0.000718928	0.0140771	0.477271	1.85552	23	GO:1904994	BP
Regulation Of Leukocyte Apoptotic Process	0.000141175	0.00378218	0.518848	1.95976	86	GO:2000106	BP
Regulation Of Leukocyte Chemotaxis	2.67176e-07	1.75774e-05	0.674963	2.12009	98	GO:0002688	BP
Regulation Of Leukocyte Degranulation	5.75829e-06	0.000270757	0.610527	1.95947	38	GO:0043300	BP
Regulation Of Leukocyte Differentiation	2.67569e-10	3.30256e-08	0.814036	1.9999	267	GO:1902105	BP
Regulation Of Leukocyte Mediated Immunity	2.91743e-14	6.95354e-12	0.965328	2.25136	169	GO:0002703	BP
Regulation Of Leukocyte Migration	1.34349e-11	2.1105e-09	0.875325	2.16098	182	GO:0002685	BP
Regulation Of Leukocyte Proliferation	1.76583e-12	3.05136e-10	0.91012	2.17917	195	GO:0070663	BP
Regulation Of Leukocyte Tethering Or Rolling	0.000705257	0.0139058	0.477271	1.7431	11	GO:1903236	BP
Regulation Of Lipid Biosynthetic Process	0.00553889	0.0596336	0.407018	1.59735	161	GO:0046890	BP
Regulation Of Lipid Catabolic Process	0.0155141	0.119267	0.38073	1.67286	48	GO:0050994	BP
Regulation Of Lipid Localization	7.72666e-06	0.00035136	0.593325	1.96771	135	GO:1905952	BP
Regulation Of Lipid Metabolic Process	0.000122837	0.0034797	0.518848	1.67847	280	GO:0019216	BP
Regulation Of Lipid Storage	0.000757532	0.0146259	0.477271	1.92737	39	GO:0010883	BP
Regulation Of Lipid Transport	0.00942482	0.0863555	0.38073	1.64538	113	GO:0032368	BP
Regulation Of Lipopolysaccharide Mediated Signaling Pathway	0.00406627	0.0493089	0.407018	1.83083	22	GO:0031664	BP
Regulation Of Lipoprotein Metabolic Process	0.00953606	0.0867454	0.38073	-1.75657	17	GO:0050746	BP
Regulation Of Long Term Neuronal Synaptic Plasticity	0.0246879	0.158683	0.352488	-1.58182	37	GO:0048169	BP
Regulation Of Lymphocyte Activation	5.75033e-14	1.28214e-11	0.954542	2.0193	370	GO:0051249	BP
Regulation Of Lymphocyte Apoptotic Process	0.00308627	0.0402497	0.431708	1.72965	58	GO:0070228	BP
Regulation Of Lymphocyte Chemotaxis	0.0215731	0.146476	0.352488	1.59297	15	GO:1901623	BP
Regulation Of Lymphocyte Differentiation	6.08613e-06	0.000284239	0.610527	1.92275	167	GO:0045619	BP
Regulation Of Lymphocyte Mediated Immunity	3.60499e-08	2.9315e-06	0.719513	2.08329	121	GO:0002706	BP
Regulation Of Lymphocyte Migration	0.00196503	0.0291025	0.431708	1.79342	52	GO:2000401	BP
Regulation Of Macrophage Activation	0.0167441	0.124385	0.352488	1.65368	47	GO:0043030	BP
Regulation Of Macrophage Chemotaxis	0.00652644	0.0668332	0.407018	1.7738	22	GO:0010758	BP
Regulation Of Macrophage Cytokine Production	0.0174472	0.126942	0.352488	1.58859	40	GO:0010935	BP
Regulation Of Macrophage Derived Foam Cell Differentiation	0.00570003	0.0606132	0.407018	1.76584	18	GO:0010743	BP
Regulation Of Macrophage Migration	0.00418224	0.0502742	0.407018	1.70058	36	GO:1905521	BP
Regulation Of Map Kinase Activity	0.00806594	0.0780056	0.38073	1.59312	135	GO:0043405	BP
Regulation Of Mast Cell Activation	0.0157161	0.120166	0.352488	1.67108	18	GO:0033003	BP
Regulation Of Mast Cell Chemotaxis	0.00544845	0.0594001	0.407018	1.67178	7	GO:0060753	BP
Regulation Of Mast Cell Degranulation	0.00305921	0.0400479	0.431708	1.81424	27	GO:0043304	BP
Regulation Of Membrane Invagination	0.0001108	0.00324513	0.538434	1.83197	15	GO:1905153	BP
Regulation Of Membrane Protein Ectodomain Proteolysis	0.0315168	0.185399	0.321776	1.60162	23	GO:0051043	BP
Regulation Of Mesenchymal Stem Cell Proliferation	0.0208588	0.142924	0.352488	1.60822	7	GO:1902460	BP
Regulation Of Metalloendopeptidase Activity	0.00538215	0.0588631	0.407018	1.59684	5	GO:1904685	BP
Regulation Of Metallopeptidase Activity	0.00525726	0.0576796	0.407018	1.65728	11	GO:1905048	BP
Regulation Of Mitochondrial Fission	0.00741999	0.0732671	0.407018	-1.70737	32	GO:0090140	BP
Regulation Of Monoatomic Ion Transmembrane Transport	0.0349076	0.199241	0.245042	1.33652	294	GO:0034765	BP
Regulation Of Monoatomic Ion Transport	0.00133351	0.0223177	0.45506	1.47753	412	GO:0043269	BP
Regulation Of Monocyte Chemotaxis	0.0107597	0.0941517	0.38073	1.71624	22	GO:0090025	BP
Regulation Of Monocyte Differentiation	0.0144579	0.11434	0.38073	1.63022	16	GO:0045655	BP
Regulation Of Mononuclear Cell Migration	7.24175e-05	0.00227522	0.538434	1.93812	113	GO:0071675	BP
Regulation Of Myeloid Cell Apoptotic Process	0.0126842	0.10527	0.38073	1.62661	29	GO:0033032	BP
Regulation Of Myeloid Cell Differentiation	5.20756e-05	0.00173887	0.557332	1.83709	181	GO:0045637	BP
Regulation Of Myeloid Leukocyte Differentiation	0.000856582	0.0161768	0.477271	1.81503	110	GO:0002761	BP
Regulation Of Myeloid Leukocyte Mediated Immunity	1.65054e-07	1.12956e-05	0.690132	2.12826	44	GO:0002886	BP
Regulation Of Myoblast Fusion	0.00914466	0.0850712	0.38073	1.66296	13	GO:1901739	BP
Regulation Of Myotube Differentiation	0.014557	0.114835	0.38073	1.62689	33	GO:0010830	BP
Regulation Of Natural Killer Cell Activation	0.0135911	0.110131	0.38073	1.72519	31	GO:0032814	BP
Regulation Of Natural Killer Cell Mediated Immune Response To Tumor Cell	0.0334428	0.192791	0.321776	1.59556	6	GO:0002855	BP
Regulation Of Neural Precursor Cell Proliferation	0.0131757	0.108031	0.38073	1.57851	112	GO:2000177	BP
Regulation Of Neuroinflammatory Response	0.0101404	0.0907625	0.38073	1.72905	26	GO:0150077	BP
Regulation Of Neuronal Synaptic Plasticity	0.0111327	0.0959467	0.38073	-1.60162	75	GO:0048168	BP
Regulation Of Neurotrophin Trk Receptor Signaling Pathway	0.0240769	0.156244	0.352488	-1.68031	16	GO:0051386	BP
Regulation Of Neutrophil Activation	0.00013596	0.00371856	0.518848	1.77027	9	GO:1902563	BP
Regulation Of Neutrophil Chemotaxis	0.00519013	0.0573124	0.407018	1.84162	31	GO:0090022	BP
Regulation Of Neutrophil Degranulation	0.00483536	0.0547005	0.407018	1.67572	6	GO:0043313	BP
Regulation Of Neutrophil Extravasation	0.0309369	0.182922	0.352488	1.57556	7	GO:2000389	BP
Regulation Of Neutrophil Migration	0.000131915	0.00369148	0.518848	2.00618	45	GO:1902622	BP
Regulation Of Nitric Oxide Metabolic Process	6.1672e-05	0.0020013	0.538434	1.97351	56	GO:0080164	BP
Regulation Of Nitric Oxide Synthase Activity	0.00847081	0.0806947	0.38073	1.65797	12	GO:0050999	BP
Regulation Of Non Canonical Nf Kappab Signal Transduction	0.00138146	0.0228984	0.45506	1.85266	83	GO:1901222	BP
Regulation Of Odontoblast Differentiation	0.0225899	0.150425	0.352488	1.55089	11	GO:1901329	BP
Regulation Of Organ Growth	0.0167733	0.124385	0.352488	-1.47685	97	GO:0046620	BP
Regulation Of Ossification	0.0350502	0.199725	0.321776	1.46596	120	GO:0030278	BP
Regulation Of Oxidoreductase Activity	0.00725605	0.0725815	0.407018	1.66675	46	GO:0051341	BP
Regulation Of P38mapk Cascade	0.00434623	0.0512308	0.407018	1.69084	38	GO:1900744	BP
Regulation Of Pattern Recognition Receptor Signaling Pathway	0.000896979	0.0165316	0.477271	1.71857	155	GO:0062207	BP
Regulation Of Peptidase Activity	0.00111847	0.0195251	0.45506	1.8464	55	GO:0052547	BP
Regulation Of Peptidyl Tyrosine Phosphorylation	2.43135e-05	0.000923378	0.57561	1.87822	168	GO:0050730	BP
Regulation Of Phagocytosis	3.58385e-07	2.29366e-05	0.674963	2.10687	82	GO:0050764	BP
Regulation Of Phospholipase Activity	0.0169337	0.124385	0.352488	-1.69136	10	GO:0010517	BP
Regulation Of Plasminogen Activation	0.00666882	0.0677866	0.407018	1.67123	15	GO:0010755	BP
Regulation Of Platelet Activation	0.00457708	0.052647	0.407018	1.83422	39	GO:0010543	BP
Regulation Of Podosome Assembly	0.00863308	0.0816578	0.38073	1.6664	13	GO:0071801	BP
Regulation Of Positive Chemotaxis	0.0285803	0.174204	0.352488	1.56434	21	GO:0050926	BP
Regulation Of Postsynaptic Membrane Neurotransmitter Receptor Levels	0.000273365	0.00653806	0.498493	-1.69847	161	GO:0099072	BP
Regulation Of Postsynaptic Membrane Potential	0.00211351	0.0308198	0.431708	-1.50351	148	GO:0060078	BP
Regulation Of Postsynaptic Neurotransmitter Receptor Internalization	0.00361732	0.0451997	0.431708	-1.81648	36	GO:0099149	BP
Regulation Of Primary Mirna Processing	0.00733927	0.0730692	0.407018	1.58572	5	GO:2000634	BP
Regulation Of Production Of Molecular Mediator Of Immune Response	2.29177e-07	1.52314e-05	0.690132	2.03605	141	GO:0002700	BP
Regulation Of Prostaglandin Secretion	0.00140744	0.0231074	0.45506	1.81287	14	GO:0032306	BP
Regulation Of Protein Autophosphorylation	0.0219969	0.148086	0.352488	1.56352	34	GO:0031952	BP
Regulation Of Protein Containing Complex Assembly	0.000359264	0.00816852	0.498493	1.55587	391	GO:0043254	BP
Regulation Of Protein Lipidation	0.0139987	0.111473	0.38073	-1.7114	12	GO:1903059	BP
Regulation Of Protein Serine Threonine Kinase Activity	0.0155326	0.119267	0.38073	1.45183	216	GO:0071900	BP
Regulation Of Protein Tyrosine Kinase Activity	0.0102793	0.0913241	0.38073	1.72324	44	GO:0061097	BP
Regulation Of Reactive Oxygen Species Metabolic Process	0.0028057	0.0372346	0.431708	1.66967	121	GO:2000377	BP
Regulation Of Receptor Catabolic Process	0.0129893	0.106756	0.38073	1.59705	11	GO:2000644	BP
Regulation Of Receptor Mediated Endocytosis	0.0324385	0.189211	0.266351	1.43304	125	GO:0048259	BP
Regulation Of Receptor Signaling Pathway Via Stat	0.00188962	0.0282096	0.45506	1.84982	71	GO:1904892	BP
Regulation Of Regulated Secretory Pathway	0.00070485	0.0139058	0.477271	1.76016	138	GO:1903305	BP
Regulation Of Release Of Sequestered Calcium Ion Into Cytosol	0.00254562	0.0350505	0.431708	1.75559	69	GO:0051279	BP
Regulation Of Release Of Sequestered Calcium Ion Into Cytosol By Sarcoplasmic Reticulum	0.0165304	0.123666	0.352488	-1.62775	21	GO:0010880	BP
Regulation Of Respiratory Burst	0.000200829	0.00502945	0.518848	1.81077	13	GO:0060263	BP
Regulation Of Respiratory Burst Involved In Inflammatory Response	0.000394986	0.00883542	0.498493	1.73306	7	GO:0060264	BP
Regulation Of Response To Biotic Stimulus	2.16629e-14	5.34764e-12	0.975995	2.00058	434	GO:0002831	BP
Regulation Of Response To Cytokine Stimulus	0.00272138	0.0365956	0.431708	1.71332	134	GO:0060759	BP
Regulation Of Response To Wounding	0.00284414	0.0375884	0.431708	1.6861	132	GO:1903034	BP
Regulation Of Rho Protein Signal Transduction	0.0225431	0.150404	0.352488	1.56582	81	GO:0035023	BP
Regulation Of Ruffle Assembly	0.0175816	0.127651	0.352488	1.64938	28	GO:1900027	BP
Regulation Of Short Term Neuronal Synaptic Plasticity	0.0107923	0.0941875	0.38073	-1.69176	22	GO:0048172	BP
Regulation Of Small Gtpase Mediated Signal Transduction	0.0111311	0.0959467	0.38073	1.45871	223	GO:0051056	BP
Regulation Of Small Molecule Metabolic Process	0.003635	0.0451997	0.431708	1.51343	290	GO:0062012	BP
Regulation Of Sodium Dependent Phosphate Transport	0.0150536	0.116649	0.38073	1.54963	5	GO:2000118	BP
Regulation Of Sphingolipid Biosynthetic Process	0.0294573	0.177514	0.352488	-1.63693	14	GO:0090153	BP
Regulation Of Substrate Adhesion Dependent Cell Spreading	0.0317419	0.186406	0.321776	1.51783	55	GO:1900024	BP
Regulation Of Superoxide Anion Generation	0.00375155	0.0463877	0.431708	1.72896	19	GO:0032928	BP
Regulation Of Superoxide Metabolic Process	0.00923102	0.0854148	0.38073	1.72934	22	GO:0090322	BP
Regulation Of Supramolecular Fiber Organization	0.0255102	0.162065	0.287857	1.34998	354	GO:1902903	BP
Regulation Of Synaptic Plasticity	0.0100233	0.0899751	0.38073	-1.32814	248	GO:0048167	BP
Regulation Of Synaptic Vesicle Membrane Organization	0.0217777	0.147287	0.352488	-1.606	26	GO:1901632	BP
Regulation Of Synaptic Vesicle Priming	0.0329064	0.190813	0.321776	-1.62095	15	GO:0010807	BP
Regulation Of Syncytium Formation By Plasma Membrane Fusion	0.00729888	0.0727992	0.407018	1.68194	19	GO:0060142	BP
Regulation Of Systemic Arterial Blood Pressure By Endothelin	0.0180929	0.130269	0.352488	1.53629	5	GO:0003100	BP
Regulation Of Systemic Arterial Blood Pressure By Hormone	0.026893	0.168069	0.352488	1.62893	31	GO:0001990	BP
Regulation Of Systemic Arterial Blood Pressure By Renin Angiotensin	0.0173715	0.126658	0.352488	1.64837	22	GO:0003081	BP
Regulation Of T Cell Activation	4.62451e-10	5.2401e-08	0.814036	1.98956	271	GO:0050863	BP
Regulation Of T Cell Apoptotic Process	0.010761	0.0941517	0.38073	1.64773	40	GO:0070232	BP
Regulation Of T Cell Cytokine Production	0.00599376	0.0633469	0.407018	1.82132	24	GO:0002724	BP
Regulation Of T Cell Mediated Cytotoxicity	0.00423006	0.0504978	0.407018	1.69783	21	GO:0001914	BP
Regulation Of T Cell Mediated Immunity	0.00269474	0.0364502	0.431708	1.79157	61	GO:0002709	BP
Regulation Of T Cell Migration	0.0108826	0.0946167	0.38073	1.72018	39	GO:2000404	BP
Regulation Of T Cell Proliferation	1.70847e-08	1.45789e-06	0.733762	2.10847	131	GO:0042129	BP
Regulation Of T Cell Receptor Signaling Pathway	0.0147544	0.115495	0.38073	1.58469	41	GO:0050856	BP
Regulation Of T Helper 1 Cell Cytokine Production	0.000148035	0.00392766	0.518848	1.66683	5	GO:2000554	BP
Regulation Of T Helper 1 Type Immune Response	9.79129e-05	0.0029611	0.538434	1.87078	19	GO:0002825	BP
Regulation Of T Helper 17 Cell Differentiation	0.00171724	0.0264672	0.45506	1.76641	19	GO:2000319	BP
Regulation Of T Helper 17 Type Immune Response	0.00322164	0.0413904	0.431708	1.80751	27	GO:2000316	BP
Regulation Of T Helper Cell Differentiation	0.0103586	0.0917132	0.38073	1.75272	32	GO:0045622	BP
Regulation Of Tissue Remodeling	0.0128102	0.105535	0.38073	1.63562	64	GO:0034103	BP
Regulation Of Tolerance Induction	0.0277607	0.171429	0.352488	1.5644	10	GO:0002643	BP
Regulation Of Toll Like Receptor Signaling Pathway	0.0078212	0.0764641	0.38073	1.67435	29	GO:0034121	BP
Regulation Of Transferase Activity	0.0165534	0.123666	0.352488	1.34515	476	GO:0051338	BP
Regulation Of Transmembrane Transport	0.00133351	0.0223177	0.45506	1.47846	412	GO:0034762	BP
Regulation Of Triglyceride Biosynthetic Process	0.00020484	0.00510722	0.518848	1.83394	21	GO:0010866	BP
Regulation Of Triglyceride Catabolic Process	0.0266128	0.166922	0.352488	1.59327	7	GO:0010896	BP
Regulation Of Triglyceride Metabolic Process	6.36251e-05	0.00204547	0.538434	1.94048	37	GO:0090207	BP
Regulation Of Type B Pancreatic Cell Development	0.0331694	0.192016	0.321776	-1.58365	6	GO:2000074	BP
Regulation Of Unsaturated Fatty Acid Biosynthetic Process	0.0240348	0.156244	0.352488	1.59739	13	GO:2001279	BP
Regulation Of Vasculature Development	4.56627e-09	4.1529e-07	0.761461	1.95372	261	GO:1901342	BP
Regulation Of Viral Entry Into Host Cell	0.00666882	0.0677866	0.407018	1.67072	15	GO:0046596	BP
Regulation Of Wound Healing	0.0103629	0.0917132	0.38073	1.68607	92	GO:0061041	BP
Relaxation Of Cardiac Muscle	0.00716666	0.0718641	0.407018	-1.76442	15	GO:0055119	BP
Reproductive System Development	0.00062983	0.0128798	0.477271	1.58984	277	GO:0061458	BP
Respiratory Burst	0.000486233	0.0105687	0.498493	1.96186	24	GO:0045730	BP
Respiratory Burst Involved In Defense Response	0.00246018	0.0342149	0.431708	1.74185	12	GO:0002679	BP
Respiratory Burst Involved In Inflammatory Response	0.00013596	0.00371856	0.518848	1.77067	9	GO:0002536	BP
Response To Acid Chemical	0.0304978	0.181725	0.352488	1.47048	136	GO:0001101	BP
Response To Alcohol	0.0259336	0.164151	0.287857	1.40562	243	GO:0097305	BP
Response To Atp	0.00983804	0.0886578	0.38073	1.76662	32	GO:0033198	BP
Response To Bacterial Lipoprotein	0.00197811	0.0292056	0.431708	1.69777	6	GO:0032493	BP
Response To Bacterium	1.37373e-31	4.74762e-28	1.46045	2.24304	481	GO:0009617	BP
Response To Chemokine	7.16392e-05	0.00226105	0.538434	1.97951	54	GO:1990868	BP
Response To Cholesterol	0.0192622	0.136136	0.352488	1.63707	22	GO:0070723	BP
Response To Corticosteroid	0.0227345	0.150952	0.352488	1.47319	133	GO:0031960	BP
Response To Dsrna	0.0203725	0.140815	0.352488	1.57547	40	GO:0043331	BP
Response To Fatty Acid	0.0228542	0.151456	0.352488	1.55049	54	GO:0070542	BP
Response To Fungus	3.34776e-07	2.16259e-05	0.674963	2.02033	38	GO:0009620	BP
Response To Gamma Radiation	0.0299548	0.179107	0.352488	1.51542	53	GO:0010332	BP
Response To Glycine	0.022981	0.151634	0.352488	-1.62058	6	GO:1905429	BP
Response To Heparin	0.0206811	0.142236	0.352488	-1.55664	5	GO:0071503	BP
Response To Hydrostatic Pressure	0.00148142	0.0239803	0.45506	1.6332	5	GO:0051599	BP
Response To Insulin	0.00515858	0.0573124	0.407018	1.47716	296	GO:0032868	BP
Response To Interleukin 1	0.000896163	0.0165316	0.477271	1.87368	86	GO:0070555	BP
Response To Interleukin 15	0.0146202	0.114835	0.38073	1.62168	8	GO:0070672	BP
Response To Interleukin 17	0.00623274	0.0648806	0.407018	1.74759	20	GO:0097396	BP
Response To Interleukin 4	0.0154875	0.119209	0.38073	1.70637	31	GO:0070670	BP
Response To Ketone	0.031679	0.186195	0.261664	1.4086	189	GO:1901654	BP
Response To Lipoprotein Particle	0.00316288	0.0409356	0.431708	1.78469	28	GO:0055094	BP
Response To Lipoteichoic Acid	0.0204885	0.141193	0.352488	1.58941	9	GO:0070391	BP
Response To Macrophage Colony Stimulating Factor	0.0126866	0.10527	0.38073	1.6331	54	GO:0036005	BP
Response To Mechanical Stimulus	0.013565	0.110131	0.38073	1.50258	199	GO:0009612	BP
Response To Molecule Of Bacterial Origin	7.5415e-18	3.06628e-15	1.08644	2.18267	286	GO:0002237	BP
Response To Oleic Acid	0.0233212	0.153082	0.352488	-1.54644	5	GO:0034201	BP
Response To Organophosphorus	0.000815975	0.0154946	0.477271	1.79028	116	GO:0046683	BP
Response To Osmotic Stress	0.0160041	0.121828	0.352488	1.60757	80	GO:0006970	BP
Response To Peptide Hormone	0.00244538	0.0341463	0.431708	1.41843	441	GO:0043434	BP
Response To Protozoan	0.000890736	0.0165316	0.477271	1.92085	22	GO:0001562	BP
Response To Purine Containing Compound	0.000795238	0.0152263	0.477271	1.80078	134	GO:0014074	BP
Response To Stem Cell Factor	0.0332554	0.192242	0.321776	1.55194	47	GO:0036215	BP
Response To Sterol	0.0165356	0.123666	0.352488	1.63028	25	GO:0036314	BP
Response To Temperature Stimulus	0.0336226	0.193666	0.257206	1.40534	148	GO:0009266	BP
Response To Transforming Growth Factor Beta	0.00922455	0.0854148	0.38073	1.43497	249	GO:0071559	BP
Response To Tumor Cell	0.0139195	0.111268	0.38073	1.64892	35	GO:0002347	BP
Response To Tumor Necrosis Factor	0.00258615	0.0354673	0.431708	1.66673	171	GO:0034612	BP
Response To Type Ii Interferon	0.00033896	0.00784775	0.498493	1.85099	104	GO:0034341	BP
Response To Type Iii Interferon	0.0144484	0.11434	0.38073	1.55158	5	GO:0034342	BP
Response To Virus	6.63497e-08	4.83959e-06	0.704976	1.87674	302	GO:0009615	BP
Response To Water	0.000281607	0.00666598	0.498493	1.7534	9	GO:0009415	BP
Response To Wounding	1.14948e-06	6.51246e-05	0.643552	1.69505	449	GO:0009611	BP
Reticulophagy	0.0309189	0.182922	0.352488	-1.62134	20	GO:0061709	BP
Retina Development In Camera Type Eye	0.00649523	0.0667847	0.407018	1.57715	161	GO:0060041	BP
Ruffle Assembly	0.00219848	0.0315268	0.431708	1.76185	41	GO:0097178	BP
Ruffle Organization	0.00139995	0.0230776	0.45506	1.88062	50	GO:0031529	BP
Sequestering Of Calcium Ion	0.000511738	0.0109171	0.477271	1.8669	111	GO:0051208	BP
Serotonin Production Involved In Inflammatory Response	0.00447887	0.0519429	0.407018	1.60208	5	GO:0002351	BP
Sex Differentiation	0.033264	0.192242	0.252961	1.37309	239	GO:0007548	BP
Skeletal System Development	0.0272177	0.169792	0.276501	1.29983	444	GO:0001501	BP
Small Gtpase Mediated Signal Transduction	0.00931265	0.0856796	0.38073	1.41862	400	GO:0007264	BP
Smooth Muscle Cell Differentiation	0.000340614	0.00784775	0.498493	1.90202	76	GO:0051145	BP
Smooth Muscle Cell Migration	0.032147	0.188053	0.271289	1.4448	105	GO:0014909	BP
Smooth Muscle Cell Proliferation	0.0161372	0.122572	0.352488	1.52361	172	GO:0048659	BP
Snare Complex Assembly	0.00921514	0.0854148	0.38073	-1.73924	15	GO:0035493	BP
Somatic Diversification Of Immunoglobulins	0.0191974	0.13605	0.352488	1.60701	55	GO:0016445	BP
Somatic Diversification Of Immunoglobulins Involved In Immune Response	0.00421435	0.0503972	0.407018	1.70435	41	GO:0002208	BP
Sphingoid Biosynthetic Process	0.0153303	0.118394	0.38073	-1.67173	13	GO:0046520	BP
Sphingolipid Biosynthetic Process	0.028226	0.172959	0.352488	-1.42885	88	GO:0030148	BP
Spinal Cord Development	0.00318256	0.0410029	0.431708	-1.68	84	GO:0021510	BP
Spinal Cord Patterning	0.00230419	0.0326122	0.431708	-1.82379	21	GO:0021511	BP
Spindle Organization	0.0333353	0.192493	0.321776	-1.27402	185	GO:0007051	BP
Stress Fiber Assembly	0.0342857	0.19683	0.261664	1.44453	108	GO:0043149	BP
Striated Muscle Atrophy	0.00794295	0.0771091	0.38073	1.58037	5	GO:0014891	BP
Substrate Adhesion Dependent Cell Spreading	0.0111112	0.0959467	0.38073	1.61345	93	GO:0034446	BP
Substrate Dependent Cell Migration	0.014524	0.114731	0.38073	1.66439	28	GO:0006929	BP
Succinate Metabolic Process	0.0181579	0.1306	0.352488	-1.65063	7	GO:0006105	BP
Succinyl Coa Metabolic Process	0.00529672	0.0580205	0.407018	-1.80993	12	GO:0006104	BP
Sulfate Transmembrane Transport	0.0207788	0.142625	0.352488	1.5793	12	GO:1902358	BP
Superoxide Anion Generation	1.66289e-05	0.000676113	0.57561	1.9676	29	GO:0042554	BP
Superoxide Metabolic Process	9.45885e-05	0.00288016	0.538434	2.00312	50	GO:0006801	BP
Symbiont Entry Into Host	0.0141192	0.112304	0.38073	1.62711	64	GO:0044409	BP
Synapse Pruning	7.55409e-06	0.000345787	0.610527	1.90707	17	GO:0098883	BP
Synaptic Membrane Adhesion	0.015564	0.119267	0.38073	-1.61071	43	GO:0099560	BP
Synaptic Transmission Cholinergic	0.00352577	0.0443093	0.431708	-1.80342	23	GO:0007271	BP
Synaptic Transmission Gabaergic	0.0136282	0.110302	0.38073	-1.59762	71	GO:0051932	BP
Synaptic Vesicle Cycle	0.000116771	0.00336301	0.538434	-1.63286	247	GO:0099504	BP
Synaptic Vesicle Exocytosis	0.0007884	0.0151373	0.477271	-1.65806	121	GO:0016079	BP
Synaptic Vesicle Lumen Acidification	0.00292072	0.0384572	0.431708	-1.8632	18	GO:0097401	BP
Synaptic Vesicle Maturation	0.012055	0.101554	0.38073	-1.66046	27	GO:0016188	BP
Synaptic Vesicle Priming	0.00149243	0.0240166	0.45506	-1.92529	33	GO:0016082	BP
Syncytium Formation	0.0240165	0.156244	0.352488	1.56696	50	GO:0006949	BP
T Cell Activation	3.93723e-18	1.81428e-15	1.09593	2.0771	438	GO:0042110	BP
T Cell Activation Involved In Immune Response	4.4008e-11	6.08366e-09	0.851339	2.25467	86	GO:0002286	BP
T Cell Activation Via T Cell Receptor Contact With Antigen Bound To Mhc Molecule On Antigen Presenting Cell	0.000664014	0.013342	0.477271	1.74514	11	GO:0002291	BP
T Cell Antigen Processing And Presentation	0.0276354	0.171429	0.352488	1.60983	6	GO:0002457	BP
T Cell Apoptotic Process	0.0168023	0.124385	0.352488	1.58956	56	GO:0070231	BP
T Cell Chemotaxis	0.00274076	0.0367134	0.431708	1.78195	16	GO:0010818	BP
T Cell Cytokine Production	0.00145268	0.0236813	0.45506	1.7928	34	GO:0002369	BP
T Cell Differentiation	1.21252e-08	1.06087e-06	0.74774	1.92857	260	GO:0030217	BP
T Cell Differentiation In Thymus	0.00177724	0.0272379	0.45506	1.7742	84	GO:0033077	BP
T Cell Differentiation Involved In Immune Response	2.68305e-06	0.000134386	0.627257	2.06074	62	GO:0002292	BP
T Cell Extravasation	0.00677388	0.0687534	0.407018	1.66261	9	GO:0072683	BP
T Cell Homeostasis	0.018067	0.130269	0.352488	1.61873	39	GO:0043029	BP
T Cell Mediated Cytotoxicity	0.0121162	0.101758	0.38073	1.73501	31	GO:0001913	BP
T Cell Mediated Immunity	0.000571005	0.0120944	0.477271	1.91369	92	GO:0002456	BP
T Cell Migration	2.40975e-05	0.000923378	0.57561	2.00755	52	GO:0072678	BP
T Cell Proliferation	2.97632e-11	4.19843e-09	0.851339	2.16414	171	GO:0042098	BP
T Cell Receptor Signaling Pathway	0.00182111	0.0274237	0.45506	1.78355	93	GO:0050852	BP
T Cell Selection	3.01417e-05	0.00110232	0.57561	1.96099	42	GO:0045058	BP
T Helper 1 Cell Cytokine Production	0.000574574	0.0121081	0.477271	1.72707	7	GO:0035744	BP
T Helper 1 Cell Differentiation	0.00635146	0.065819	0.407018	1.74741	20	GO:0045063	BP
T Helper 1 Type Immune Response	9.7733e-07	5.62942e-05	0.643552	2.04048	37	GO:0042088	BP
T Helper 17 Cell Differentiation	9.93355e-05	0.00298525	0.538434	1.93167	25	GO:0072539	BP
T Helper 17 Cell Lineage Commitment	0.0151485	0.117253	0.38073	1.60517	12	GO:0072540	BP
T Helper 17 Type Immune Response	1.98542e-05	0.000779728	0.57561	1.93869	36	GO:0072538	BP
T Helper 2 Cell Differentiation	0.0216841	0.146889	0.352488	1.62663	14	GO:0045064	BP
T Helper Cell Lineage Commitment	0.0164671	0.123661	0.352488	1.61471	15	GO:0002295	BP
Tangential Migration From The Subventricular Zone To The Olfactory Bulb	0.0187827	0.133566	0.352488	-1.68224	9	GO:0022028	BP
Taxis	1.46748e-16	4.83009e-14	1.04763	2.10798	337	GO:0042330	BP
Temperature Homeostasis	0.00327017	0.0417164	0.431708	1.6702	157	GO:0001659	BP
Thelarche	0.0102123	0.0908799	0.38073	1.56658	5	GO:0042695	BP
Thioester Biosynthetic Process	0.0169963	0.124712	0.352488	-1.63564	37	GO:1901337	BP
Thrombin Activated Receptor Signaling Pathway	0.0169087	0.124385	0.352488	1.57177	11	GO:0070493	BP
Thymic T Cell Selection	0.00137446	0.0228894	0.45506	1.7788	19	GO:0045061	BP
Tight Junction Organization	0.00810465	0.0781302	0.38073	1.6916	69	GO:0120193	BP
Tissue Homeostasis	0.00108111	0.0191996	0.45506	1.61799	235	GO:0001894	BP
Tissue Remodeling	0.00195672	0.0290856	0.431708	1.66274	168	GO:0048771	BP
Tolerance Induction	0.00111863	0.0195251	0.45506	1.76178	15	GO:0002507	BP
Toll Like Receptor 2 Signaling Pathway	0.00706835	0.0710123	0.407018	1.6997	16	GO:0034134	BP
Toll Like Receptor 3 Signaling Pathway	0.0325136	0.189405	0.321776	1.65064	24	GO:0034138	BP
Toll Like Receptor 4 Signaling Pathway	0.0166125	0.123734	0.352488	1.60112	53	GO:0034142	BP
Toll Like Receptor 7 Signaling Pathway	0.00250001	0.0346989	0.431708	1.70099	8	GO:0034154	BP
Toll Like Receptor 9 Signaling Pathway	0.0185095	0.132304	0.352488	1.60742	15	GO:0034162	BP
Toll Like Receptor Signaling Pathway	5.38007e-07	3.26202e-05	0.659444	2.10334	63	GO:0002224	BP
Tongue Development	0.0139568	0.111268	0.38073	-1.64416	21	GO:0043586	BP
Translation At Synapse	0.00187145	0.0279989	0.45506	1.86056	35	GO:0140241	BP
Transmission Of Nerve Impulse	0.0102161	0.0908799	0.38073	-1.51717	93	GO:0019226	BP
Tricarboxylic Acid Cycle	0.00221855	0.031683	0.431708	-1.84014	29	GO:0006099	BP
Triglyceride Biosynthetic Process	0.000984618	0.0177329	0.45506	1.77325	38	GO:0019432	BP
Triglyceride Catabolic Process	0.0284787	0.173891	0.352488	1.57334	15	GO:0019433	BP
Triglyceride Metabolic Process	0.00123063	0.0210027	0.45506	1.83595	80	GO:0006641	BP
Triglyceride Storage	0.015015	0.116649	0.38073	1.58797	11	GO:0030730	BP
Trophectodermal Cell Proliferation	0.0277636	0.171429	0.352488	1.58993	7	GO:0001834	BP
Trophoblast Cell Migration	0.0162035	0.12294	0.352488	1.66564	18	GO:0061450	BP
Tumor Necrosis Factor Mediated Signaling Pathway	0.00863598	0.0816578	0.38073	1.71895	79	GO:0033209	BP
Tumor Necrosis Factor Superfamily Cytokine Production	7.11113e-13	1.40435e-10	0.921426	2.22626	152	GO:0071706	BP
Type B Pancreatic Cell Development	0.00735766	0.0730692	0.407018	-1.77423	20	GO:0003323	BP
Type I Interferon Production	0.00180957	0.0273692	0.45506	1.70301	121	GO:0032606	BP
Type Ii Interferon Production	9.81037e-05	0.0029611	0.538434	1.95854	82	GO:0032609	BP
Tyrosine Phosphorylation Of Stat Protein	0.0149196	0.116176	0.38073	1.62213	43	GO:0007260	BP
Unsaturated Fatty Acid Biosynthetic Process	0.0062992	0.0654738	0.407018	1.67621	51	GO:0006636	BP
Unsaturated Fatty Acid Metabolic Process	0.0149254	0.116176	0.38073	1.60138	81	GO:0033559	BP
Vacuolar Localization	0.00273102	0.0366541	0.431708	1.75911	75	GO:1990849	BP
Vascular Associated Smooth Muscle Cell Differentiation	1.27604e-05	0.000537806	0.593325	1.94193	38	GO:0035886	BP
Vascular Endothelial Growth Factor Production	2.7994e-05	0.00104592	0.57561	2.0175	27	GO:0010573	BP
Venous Blood Vessel Morphogenesis	0.0177203	0.128388	0.352488	1.56695	11	GO:0048845	BP
Ventral Spinal Cord Development	0.00417382	0.0502604	0.407018	-1.79923	36	GO:0021517	BP
Ventral Spinal Cord Interneuron Differentiation	0.00033992	0.00784775	0.498493	-1.98784	12	GO:0021514	BP
Very Long Chain Fatty Acid Biosynthetic Process	0.026469	0.166171	0.352488	-1.63742	10	GO:0042761	BP
Very Long Chain Fatty Acid Metabolic Process	0.00741894	0.0732671	0.407018	-1.72751	29	GO:0000038	BP
Vesicle Localization	0.0230346	0.151634	0.352488	-1.29483	207	GO:0051648	BP
Vesicle Mediated Transport In Synapse	8.22217e-08	5.79915e-06	0.704976	-1.8111	302	GO:0099003	BP
Vitamin Transport	0.0164696	0.123661	0.352488	1.57986	36	GO:0051180	BP
Walking Behavior	0.0283986	0.17357	0.352488	-1.51078	55	GO:0090659	BP
Wound Healing	2.42133e-06	0.000122162	0.627257	1.76153	317	GO:0042060	BP
Zymogen Activation	0.0287524	0.174637	0.352488	1.6056	28	GO:0031638	BP
Actin Based Cell Projection	0.00976741	0.115179	0.38073	1.49015	210	GO:0098858	CC
Actin Cytoskeleton	0.000368674	0.0148931	0.498493	1.50255	474	GO:0015629	CC
Actin Filament	0.00135367	0.0366086	0.45506	1.72822	116	GO:0005884	CC
Actin Filament Bundle	0.00264231	0.052157	0.431708	1.6668	102	GO:0032432	CC
Activin Receptor Complex	0.0119242	0.129233	0.38073	1.63952	7	GO:0048179	CC
Actomyosin	0.00285713	0.0551973	0.431708	1.64846	102	GO:0042641	CC
Alpha Ketoacid Dehydrogenase Complex	0.0182494	0.167378	0.352488	-1.59411	17	GO:0045240	CC
Atpase Dependent Transmembrane Transport Complex	0.000485801	0.0169657	0.498493	-1.9039	33	GO:0098533	CC
Axolemma	0.002004	0.0442313	0.431708	-1.82647	20	GO:0030673	CC
Axon Hillock	0.00699908	0.100549	0.407018	-1.68498	10	GO:0043203	CC
Basement Membrane	0.0170955	0.159091	0.352488	1.54496	106	GO:0005604	CC
Blood Microparticle	0.00939704	0.113767	0.38073	1.59264	5	GO:0072562	CC
Canonical Inflammasome Complex	0.0137076	0.136921	0.38073	1.59623	14	GO:0061702	CC
Cation Channel Complex	0.010394	0.116515	0.38073	-1.40989	174	GO:0034703	CC
Caveola	0.00800894	0.106943	0.38073	1.608	98	GO:0005901	CC
Cell Body Fiber	0.0120978	0.129233	0.38073	-1.67267	8	GO:0070852	CC
Cell Cell Junction	0.00610316	0.0908471	0.407018	1.38274	471	GO:0005911	CC
Cell Leading Edge	0.00664072	0.0972544	0.407018	1.4103	439	GO:0031252	CC
Cell Substrate Junction	0.000155465	0.00882264	0.518848	1.72902	194	GO:0030055	CC
Ciliary Rootlet	0.00847842	0.108428	0.38073	-1.70889	13	GO:0035253	CC
Clathrin Coated Vesicle Membrane	0.00202105	0.0442313	0.431708	-1.73617	71	GO:0030665	CC
Clathrin Sculpted Glutamate Transport Vesicle	0.00733858	0.100961	0.407018	-1.7147	7	GO:0060199	CC
Clathrin Sculpted Vesicle	0.0111731	0.123722	0.38073	-1.67916	8	GO:0060198	CC
Coated Vesicle Membrane	0.00845193	0.108428	0.38073	-1.4885	117	GO:0030662	CC
Collagen Containing Extracellular Matrix	0.00106419	0.0333201	0.45506	1.61225	263	GO:0031012	CC
Collagen Trimer	0.000603922	0.0203097	0.477271	1.8195	67	GO:0005581	CC
Cortical Actin Cytoskeleton	0.0216829	0.184345	0.352488	1.56955	84	GO:0030864	CC
Cortical Cytoskeleton	0.0103029	0.116515	0.38073	1.56495	108	GO:0030863	CC
Cytoplasmic Dynein Complex	0.00761064	0.103141	0.407018	-1.68753	20	GO:0005868	CC
Cytoplasmic Region	0.00192905	0.0442313	0.45506	-1.4115	270	GO:0099568	CC
Cytoplasmic Side Of Membrane	0.00553625	0.084128	0.407018	1.53991	184	GO:0098562	CC
Cytoplasmic Side Of Plasma Membrane	0.0086184	0.108688	0.38073	1.55271	146	GO:0009898	CC
Cytosolic Large Ribosomal Subunit	0.00554647	0.084128	0.407018	1.87023	38	GO:0022625	CC
Cytosolic Ribosome	0.00131309	0.0366086	0.45506	1.82717	88	GO:0022626	CC
Cytosolic Small Ribosomal Subunit	0.022091	0.185728	0.352488	1.6836	31	GO:0022627	CC
Dendrite Cytoplasm	0.00474439	0.084128	0.407018	-1.77571	35	GO:0032839	CC
Dendrite Membrane	0.0157048	0.148541	0.352488	-1.5771	54	GO:0032590	CC
Distal Axon	0.000249608	0.0113322	0.498493	-1.44727	386	GO:0150034	CC
Early Endosome	0.015658	0.148541	0.352488	1.3519	383	GO:0005769	CC
Early Phagosome	0.00209465	0.0442313	0.431708	1.70899	15	GO:0032009	CC
Endocytic Vesicle	0.000135441	0.0081987	0.518848	1.75229	199	GO:0030139	CC
Endocytic Vesicle Membrane	0.01198	0.129233	0.38073	1.63464	66	GO:0030666	CC
Exocytic Vesicle	2.69144e-09	6.10958e-07	0.774939	-1.99745	285	GO:0070382	CC
External Encapsulating Structure	0.00137081	0.0366086	0.45506	1.50781	395	GO:0030312	CC
External Side Of Plasma Membrane	1.9531e-24	1.77341e-21	1.27903	2.36764	243	GO:0009897	CC
Extracellular Exosome	0.0249346	0.197514	0.352488	1.53987	76	GO:0070062	CC
Extracellular Organelle	0.0128704	0.134326	0.38073	1.56813	94	GO:0043230	CC
Extrinsic Component Of Postsynaptic Membrane	0.0242724	0.19678	0.352488	1.57165	24	GO:0098890	CC
Extrinsic Component Of Presynaptic Membrane	0.00890533	0.110768	0.38073	1.61649	18	GO:0098888	CC
Gaba Ergic Synapse	0.000247277	0.0113322	0.498493	-1.70065	161	GO:0098982	CC
Host Cellular Component	0.0133926	0.136634	0.38073	1.57864	5	GO:0018995	CC
Immunological Synapse	0.0145017	0.140081	0.38073	1.72145	37	GO:0001772	CC
Integrin Complex	0.00228961	0.0461993	0.431708	1.79193	27	GO:0008305	CC
Kinesin Complex	0.0241151	0.19678	0.352488	-1.55228	40	GO:0005871	CC
Lamellipodium	0.001519	0.0383127	0.45506	1.64147	198	GO:0030027	CC
Lytic Vacuole	0.000204144	0.0107125	0.518848	1.56196	465	GO:0000323	CC
Membrane Microdomain	9.26181e-07	0.000160666	0.659444	1.83956	285	GO:0098857	CC
Microtubule	3.2189e-05	0.00324751	0.557332	-1.50145	411	GO:0005874	CC
Microtubule Associated Complex	0.00519018	0.084128	0.407018	-1.58018	122	GO:0005875	CC
Mitochondrial Matrix	0.00013308	0.0081987	0.518848	-1.51723	352	GO:0005759	CC
Mitochondrial Protein Containing Complex	0.00134979	0.0366086	0.45506	-1.62165	158	GO:0098798	CC
Monoatomic Ion Channel Complex	0.0250156	0.197514	0.352488	-1.2465	281	GO:0034702	CC
Myelin Sheath	2.29988e-10	6.96098e-08	0.826657	-2.20496	197	GO:0043209	CC
Myofilament	0.0217234	0.184345	0.352488	-1.56498	18	GO:0036379	CC
Nadh Dehydrogenase Complex	0.000927915	0.0300909	0.477271	-1.90932	41	GO:0030964	CC
Nadph Oxidase Complex	0.00039365	0.0148931	0.498493	1.71653	6	GO:0043020	CC
Neurofilament	0.0050196	0.084128	0.407018	-1.77269	13	GO:0005883	CC
Neuron Projection Cytoplasm	0.00530241	0.084128	0.407018	-1.56468	95	GO:0120111	CC
Neuron Projection Membrane	0.00956002	0.114217	0.38073	-1.57989	78	GO:0032589	CC
Neuron Projection Terminus	0.0049912	0.084128	0.407018	-1.36451	203	GO:0044306	CC
Nucleoid	7.38279e-05	0.00579531	0.538434	-2.04664	48	GO:0009295	CC
Organelle Membrane Contact Site	0.0207089	0.180805	0.352488	-1.57457	45	GO:0044232	CC
Parallel Fiber To Purkinje Cell Synapse	0.0202365	0.180144	0.352488	-1.6107	41	GO:0098688	CC
Paranode Region Of Axon	0.00293854	0.0555874	0.431708	-1.76071	15	GO:0033270	CC
Phagocytic Vesicle	0.000212362	0.0107125	0.518848	1.87684	111	GO:0045335	CC
Phagocytic Vesicle Membrane	0.0133543	0.136634	0.38073	1.67899	46	GO:0030670	CC
Phagophore Assembly Site	0.00208642	0.0442313	0.431708	-1.85697	35	GO:0000407	CC
Phagophore Assembly Site Membrane	0.0138731	0.136921	0.38073	-1.66892	19	GO:0034045	CC
Pi Body	0.00538087	0.084128	0.407018	-1.6415	5	GO:0071546	CC
Plasma Membrane Protein Complex	0.000378975	0.0148931	0.498493	1.53657	446	GO:0098797	CC
Plasma Membrane Raft	0.00224903	0.0461993	0.431708	1.73963	122	GO:0044853	CC
Plasma Membrane Signaling Receptor Complex	8.02058e-05	0.00579531	0.538434	1.83136	146	GO:0098802	CC
Podosome	0.00429429	0.0795758	0.407018	1.78171	47	GO:0002102	CC
Postsynaptic Membrane	0.0232962	0.1923	0.352488	-1.21303	377	GO:0045211	CC
Postsynaptic Specialization Membrane	0.00195181	0.0442313	0.45506	-1.47328	185	GO:0099634	CC
Presynaptic Active Zone	0.00206222	0.0442313	0.431708	-1.61486	137	GO:0048786	CC
Presynaptic Active Zone Cytoplasmic Component	0.0205614	0.180805	0.352488	-1.5561	20	GO:0098831	CC
Presynaptic Active Zone Membrane	0.0226111	0.188357	0.352488	-1.4972	74	GO:0048787	CC
Presynaptic Cytoskeleton	0.00824506	0.108428	0.38073	-1.71069	8	GO:0099569	CC
Presynaptic Membrane	0.010065	0.115722	0.38073	-1.31597	254	GO:0042734	CC
Protein Complex Involved In Cell Adhesion	0.00533829	0.084128	0.407018	1.76202	47	GO:0098636	CC
Protein Phosphatase Type 2a Complex	0.0125796	0.132817	0.38073	-1.62246	14	GO:0000159	CC
Proton Transporting Atp Synthase Complex	0.0171706	0.159091	0.352488	-1.61278	17	GO:0045259	CC
Proton Transporting Two Sector Atpase Complex	0.000429714	0.0156072	0.498493	-1.89777	39	GO:0016469	CC
Proton Transporting Two Sector Atpase Complex Proton Transporting Domain	0.0193592	0.174041	0.352488	-1.63288	8	GO:0033177	CC
Proton Transporting V Type Atpase Complex	0.0100683	0.115722	0.38073	-1.652	22	GO:0033176	CC
Receptor Complex	6.32492e-05	0.00574302	0.538434	1.70547	313	GO:0043235	CC
Respiratory Chain Complex	1.06167e-06	0.000160666	0.643552	-2.12604	87	GO:0098803	CC
Ribbon Synapse	0.00719791	0.100549	0.407018	-1.6735	32	GO:0097470	CC
Ruffle	0.00123447	0.0366086	0.45506	1.61395	183	GO:0001726	CC
Ruffle Membrane	0.00921066	0.113017	0.38073	1.59941	98	GO:0032587	CC
Sarcoplasmic Reticulum Membrane	0.00719791	0.100549	0.407018	-1.67261	32	GO:0033017	CC
Scar Complex	0.0210847	0.182333	0.352488	1.57608	12	GO:0031209	CC
Secretory Granule	0.0140979	0.137644	0.38073	1.39749	305	GO:0030141	CC
Side Of Membrane	2.28033e-19	1.03527e-16	1.13309	2.06767	487	GO:0098552	CC
Smooth Endoplasmic Reticulum	0.0138632	0.136921	0.38073	-1.6219	34	GO:0005790	CC
Sodium Potassium Exchanging Atpase Complex	0.00555912	0.084128	0.407018	-1.73968	8	GO:0005890	CC
Sperm Annulus	0.00145208	0.0376711	0.45506	-1.83725	8	GO:0097227	CC
Synaptic Vesicle Membrane	2.53964e-06	0.000329427	0.627257	-1.94073	161	GO:0030672	CC
Transport Vesicle	8.29724e-05	0.00579531	0.538434	-1.5187	394	GO:0030133	CC
Transport Vesicle Membrane	8.75961e-06	0.000994216	0.593325	-1.72265	229	GO:0030658	CC
Transporter Complex	0.000302033	0.0130593	0.498493	-1.48512	401	GO:1990351	CC
Tricarboxylic Acid Cycle Heteromeric Enzyme Complex	0.00492918	0.084128	0.407018	-1.70742	15	GO:0045239	CC
Vacuolar Proton Transporting V Type Atpase V0 Domain	0.0193592	0.174041	0.352488	-1.63288	8	GO:0000220	CC
Varicosity	0.0247045	0.197514	0.352488	1.56715	11	GO:0043196	CC
1 Phosphatidylinositol 4 5 Bisphosphate 3 Kinase Activity	0.00905877	0.175006	0.38073	1.60287	7	GO:0046934	MF
1 Phosphatidylinositol 4 Phosphate 3 Kinase Activity	0.00995876	0.175006	0.38073	1.59798	6	GO:0035005	MF
Acetyltransferase Activity	0.00713089	0.152868	0.407018	-1.57734	101	GO:0016407	MF
Actin Binding	0.00142965	0.0677568	0.45506	1.50259	391	GO:0003779	MF
Actin Filament Binding	0.00379898	0.11867	0.431708	1.59032	199	GO:0051015	MF
Active Monoatomic Ion Transmembrane Transporter Activity	0.00339963	0.110771	0.431708	-1.68929	62	GO:0022853	MF
Acyltransferase Activity Transferring Groups Other Than Amino Acyl Groups	0.00764047	0.159329	0.407018	-1.35398	206	GO:0016747	MF
Adp Ribose Diphosphatase Activity	0.0114126	0.189886	0.38073	1.59189	6	GO:0047631	MF
Amine Binding	0.00923734	0.175006	0.38073	-1.77097	15	GO:0043176	MF
Atpase Coupled Ion Transmembrane Transporter Activity	0.00903621	0.175006	0.38073	-1.78873	16	GO:0042625	MF
C C Chemokine Binding	0.00195724	0.082733	0.431708	1.81066	13	GO:0019957	MF
Calcium Dependent Phospholipase A2 Activity	0.00532466	0.134319	0.407018	1.73713	8	GO:0047498	MF
Calcium Ion Binding	0.00217965	0.0874095	0.431708	1.46906	445	GO:0005509	MF
Carbohydrate Binding	0.00815902	0.167904	0.38073	1.5406	180	GO:0030246	MF
Cell Adhesion Molecule Binding	0.00017576	0.0211452	0.518848	1.70231	266	GO:0050839	MF
Chemokine Activity	0.00136458	0.0666939	0.45506	1.84429	12	GO:0008009	MF
Chemokine Binding	0.00706971	0.152868	0.407018	1.7314	22	GO:0019956	MF
Chemokine Receptor Binding	0.00207121	0.0852466	0.431708	1.90306	24	GO:0042379	MF
Coreceptor Activity	0.000571011	0.044653	0.477271	1.9332	32	GO:0015026	MF
Cxcr Chemokine Receptor Binding	0.00552814	0.137238	0.407018	1.73409	8	GO:0045236	MF
Cxcr3 Chemokine Receptor Binding	0.000399566	0.0367601	0.498493	1.69269	5	GO:0048248	MF
Cytokine Activity	0.000139685	0.0182057	0.518848	1.9331	100	GO:0005125	MF
Cytokine Binding	5.09042e-09	2.6538e-06	0.761461	2.18251	99	GO:0019955	MF
Cytokine Receptor Activity	4.29254e-10	3.35677e-07	0.814036	2.22987	56	GO:0004896	MF
Cytokine Receptor Binding	6.25933e-08	2.4474e-05	0.704976	2.06123	161	GO:0005126	MF
Death Receptor Activity	0.00580352	0.137526	0.407018	1.69706	9	GO:0005035	MF
Endopeptidase Activity	1.34111e-05	0.00349583	0.593325	1.72281	332	GO:0004175	MF
Endopeptidase Regulator Activity	0.000127167	0.0182057	0.518848	1.95288	91	GO:0061135	MF
Enzyme Inhibitor Activity	0.00129428	0.0652983	0.45506	1.60019	261	GO:0004857	MF
G Protein Coupled Glutamate Receptor Activity	0.00161968	0.0745055	0.45506	-1.81779	9	GO:0098988	MF
G Protein Coupled Purinergic Nucleotide Receptor Activity	0.00112722	0.0596162	0.45506	1.79136	10	GO:0045028	MF
G Protein Coupled Receptor Activity	0.0010653	0.0596162	0.45506	1.64576	256	GO:0004930	MF
G Protein Coupled Receptor Binding	0.00442316	0.121365	0.407018	1.61394	200	GO:0001664	MF
Growth Factor Binding	0.000955001	0.0596162	0.477271	1.74694	126	GO:0019838	MF
Growth Factor Receptor Binding	0.00425715	0.121365	0.407018	1.72446	111	GO:0070851	MF
Gtpase Activator Activity	0.00572283	0.137526	0.407018	1.56023	221	GO:0005096	MF
Hsp70 Protein Binding	0.000136945	0.0182057	0.518848	-1.95762	49	GO:0030544	MF
Hydrolase Activity Acting On Glycosyl Bonds	0.00386967	0.11867	0.431708	1.76988	95	GO:0016798	MF
Hydrolase Activity Hydrolyzing N Glycosyl Compounds	0.00258502	0.0940226	0.431708	1.9159	33	GO:0016799	MF
Hypotaurine Monooxygenase Activity	0.00239139	0.0890507	0.431708	1.6642	5	GO:0047822	MF
Immune Receptor Activity	2.0961e-12	3.2783e-09	0.898671	2.29628	65	GO:0140375	MF
Immunoglobulin Binding	0.00236626	0.0890507	0.431708	1.74515	10	GO:0019865	MF
Importin Alpha Family Protein Binding	0.000129231	0.0182057	0.518848	-1.94206	9	GO:0061676	MF
Integrin Binding	9.05128e-05	0.0176952	0.538434	1.90036	132	GO:0005178	MF
Interleukin 1 Receptor Activity	0.00763268	0.159329	0.407018	1.60728	6	GO:0004908	MF
Interleukin 1 Receptor Binding	0.00326817	0.110225	0.431708	1.80187	12	GO:0005149	MF
Intracellularly Gated Calcium Channel Activity	0.00713512	0.152868	0.407018	1.68898	13	GO:0015278	MF
Lamin Binding	0.00432913	0.121365	0.407018	-1.85362	17	GO:0005521	MF
Laminin 1 Binding	0.00995017	0.175006	0.38073	-1.72545	6	GO:0043237	MF
Lipopeptide Binding	0.00383769	0.11867	0.431708	1.65297	5	GO:0071723	MF
Lipoteichoic Acid Binding	0.0104091	0.180887	0.38073	1.61986	5	GO:0070891	MF
Mannosyl Oligosaccharide 1 2 Alpha Mannosidase Activity	0.00289715	0.100692	0.431708	1.64146	6	GO:0015924	MF
Mannosyl Oligosaccharide Mannosidase Activity	0.00933862	0.175006	0.38073	1.70027	8	GO:0015924	MF
Mhc Protein Complex Binding	0.011025	0.189186	0.38073	1.59132	7	GO:0023023	MF
Molecular Function Inhibitor Activity	0.00873348	0.175006	0.38073	1.44961	362	GO:0140678	MF
N Acetyltransferase Activity	0.0098316	0.175006	0.38073	-1.5475	70	GO:0008080	MF
N N Dimethylaniline Monooxygenase Activity	0.00239139	0.0890507	0.431708	1.6642	5	GO:0004499	MF
Nadplus Nucleosidase Activity Cyclic Adp Ribose Generating	0.000322839	0.0333515	0.498493	1.87864	15	GO:0061809	MF
Nitric Oxide Binding	0.00575696	0.137526	0.407018	-1.6976	5	GO:0070026	MF
Non Membrane Spanning Protein Tyrosine Kinase Activity	0.00990769	0.175006	0.38073	1.8354	40	GO:0004715	MF
Nucleoside Triphosphatase Regulator Activity	0.00114353	0.0596162	0.45506	1.52524	407	GO:0060589	MF
Nucleotide Receptor Activity	0.00331237	0.110225	0.431708	1.85082	17	GO:0016502	MF
Oxidoreductase Activity Acting On Nad P H	0.00932892	0.175006	0.38073	1.69965	49	GO:0016651	MF
Oxidoreductase Activity Acting On Nad P H Oxygen As Acceptor	0.000195585	0.0218496	0.518848	1.83829	14	GO:0050664	MF
P Type Potassium Transmembrane Transporter Activity	0.00185497	0.082733	0.45506	-1.77077	7	GO:0008556	MF
Pattern Recognition Receptor Activity	0.000684566	0.0486664	0.477271	1.94005	27	GO:0038187	MF
Peptidase Regulator Activity	2.42867e-06	0.000759689	0.627257	1.99028	124	GO:0061134	MF
Phosphatidylinositol 3 4 Bisphosphate Binding	0.00627017	0.142124	0.407018	1.71444	25	GO:1902936	MF
Phosphoprotein Binding	0.00493044	0.130372	0.407018	1.75852	99	GO:0051219	MF
Phosphotyrosine Residue Binding	0.000341192	0.0333515	0.498493	2.00238	45	GO:0001784	MF
Primary Active Transmembrane Transporter Activity	0.006257	0.142124	0.407018	-1.57224	104	GO:0015399	MF
Protein Phosphatase Binding	0.00988132	0.175006	0.38073	1.52846	167	GO:0019903	MF
Protein Phosphorylated Amino Acid Binding	0.00108584	0.0596162	0.45506	1.89272	58	GO:0045309	MF
Protein Tyrosine Kinase Activity	0.000626234	0.0466395	0.477271	1.74748	156	GO:0004713	MF
Rna Polymerase Ii C Terminal Domain Phosphoserine Binding	0.0111286	0.189186	0.38073	-1.65549	5	GO:1990269	MF
Rrna Binding	0.00277882	0.0987745	0.431708	1.82841	62	GO:0019843	MF
Serine Hydrolase Activity	0.00457362	0.12333	0.407018	1.66306	129	GO:0017171	MF
Sh3 Domain Binding	0.000533512	0.0439164	0.477271	1.83887	113	GO:0017124	MF
Sialic Acid Binding	0.000888575	0.0596162	0.477271	1.78877	9	GO:0033691	MF
Signaling Receptor Regulator Activity	3.10193e-05	0.0069306	0.557332	1.74685	291	GO:0030545	MF
Sirna Binding	0.00191598	0.082733	0.45506	1.77853	11	GO:0035197	MF
Steroid Hormone Binding	0.00949444	0.175006	0.38073	-1.73491	6	GO:1990239	MF
Superoxide Generating Nad P H Oxidase Activity	0.00410374	0.121365	0.407018	1.75564	8	GO:0016175	MF
Superoxide Generating Nadph Oxidase Activator Activity	0.00690792	0.152868	0.407018	1.61323	6	GO:0016176	MF
Superoxide Generating Nadph Oxidase Activity	0.00111574	0.0596162	0.45506	1.69344	7	GO:0106292	MF
Toll Like Receptor Binding	0.00100302	0.0596162	0.45506	1.81026	11	GO:0035325	MF
Transforming Growth Factor Beta Binding	0.00880119	0.175006	0.38073	1.65842	25	GO:0050431	MF
Transforming Growth Factor Beta Receptor Binding	0.011385	0.189886	0.38073	1.71995	23	GO:0005160	MF
Transmembrane Receptor Protein Kinase Activity	0.00500149	0.130372	0.407018	1.71487	80	GO:0019199	MF
Transmembrane Receptor Protein Phosphatase Activity	0.00622221	0.142124	0.407018	1.63856	5	GO:0019198	MF
Tubulin Binding	0.000486775	0.0422954	0.498493	-1.39472	337	GO:0015631	MF
Tumor Necrosis Factor Binding	0.00520589	0.133476	0.407018	1.63423	7	GO:0043120	MF
Tumor Necrosis Factor Receptor Activity	0.0043593	0.121365	0.407018	1.6486	5	GO:0005031	MF
Type Ii Transforming Growth Factor Beta Receptor Binding	0.00435114	0.121365	0.407018	1.7076	10	GO:0005114	MF

## Sheet: cortex_immune
pathway	pval	padj	log2err	NES	size
B Cell Ifna1 Response Dn	2.69764e-06	3.91157e-05	0.627257	1.97156	151
B Cell Ifna1 Response Up	0.00053249	0.0025229	0.477271	1.50279	469
B Cell Ifnb Response Dn	1.01504e-06	1.72308e-05	0.643552	2.01078	147
B Cell Ifnb Response Up	1.94001e-05	0.000214325	0.57561	1.65601	401
B Cell Ifne Response Up	0.000263633	0.00156828	0.498493	1.93834	27
B Cell Ifng Response Up	0.000202302	0.00124604	0.518848	1.91244	98
B Cell Ifnk Response Up	0.00207967	0.00765847	0.431708	1.85877	62
B Cell Il15 Response Up	7.4583e-05	0.000610704	0.538434	1.96655	85
B Cell Il18 Response Up	0.00154317	0.00600028	0.45506	1.8396	72
B Cell Il1a Response Dn	0.111274	0.182728	0.159647	1.37866	25
B Cell Il1a Response Up	0.00298907	0.010099	0.431708	1.90217	47
B Cell Il1b Response Up	0.0500928	0.0971158	0.276501	1.5358	6
B Cell Il2 Response Up	0.0915254	0.156901	0.191892	1.46777	12
B Cell Il27 Response Up	0.00221586	0.00805562	0.431708	1.67516	8
B Cell Il33 Response Up	0.0193313	0.0454547	0.352488	1.60016	17
B Cell Il36a Response Up	0.0113399	0.0297832	0.38073	1.72831	21
B Cell Il36ra Response Up	0.0130747	0.0330909	0.38073	1.64513	5
B Cell Il4 Response Dn	0.00244529	0.00868329	0.431708	1.83146	56
B Cell Il7 Response Up	0.0248744	0.0547867	0.352488	1.64332	25
B Cell Il9 Response Up	0.0172874	0.0416333	0.352488	-1.62671	6
Cdc1 Flt3l Response Up	0.0241754	0.0535863	0.352488	1.53385	104
Cdc1 Gm Csf Response Dn	0.00143218	0.00566363	0.45506	1.84138	78
Cdc1 Gm Csf Response Up	0.000493667	0.00238606	0.477271	1.61655	305
Cdc1 Ifna1 Response Dn	6.23516e-07	1.1672e-05	0.659444	1.73032	430
Cdc1 Ifna1 Response Up	7.93491e-11	5.02063e-09	0.839089	1.86877	464
Cdc1 Ifnb Response Dn	0.000109766	0.0007958	0.538434	1.78637	205
Cdc1 Ifnb Response Up	8.18837e-05	0.000633234	0.538434	1.65302	393
Cdc1 Ifne Response Dn	0.045614	0.0899359	0.282013	1.56278	10
Cdc1 Ifne Response Up	0.120735	0.194517	0.143759	1.32563	47
Cdc1 Ifng Response Dn	0.0120747	0.031011	0.38073	1.7702	47
Cdc1 Ifng Response Up	1.67327e-06	2.64681e-05	0.643552	1.97966	168
Cdc1 Ifnk Response Dn	0.0116982	0.0302675	0.38073	1.70853	29
Cdc1 Ifnk Response Up	0.00255781	0.0089459	0.431708	1.67411	120
Cdc1 Ifnl2 Response Dn	0.0331935	0.0695864	0.321776	1.5726	6
Cdc1 Il10 Response Dn	0.0388471	0.0795223	0.257206	1.46667	60
Cdc1 Il10 Response Up	0.00173174	0.00655049	0.45506	1.84483	81
Cdc1 Il11 Response Up	0.0228604	0.0514915	0.352488	1.64938	7
Cdc1 Il12 Response Dn	0.0276176	0.0596953	0.352488	1.58664	6
Cdc1 Il12 Response Up	0.00200538	0.00742417	0.431708	1.87134	69
Cdc1 Il13 Response Dn	0.000485344	0.00236223	0.498493	1.79037	18
Cdc1 Il13 Response Up	0.0187009	0.0442715	0.352488	1.61355	69
Cdc1 Il15 Response Dn	0.000132573	0.000913573	0.518848	1.74583	214
Cdc1 Il15 Response Up	2.92944e-13	5.09723e-11	0.932595	2.05689	347
Cdc1 Il18 Response Dn	1.57075e-05	0.000176329	0.57561	1.95273	129
Cdc1 Il18 Response Up	1.94981e-06	3.0157e-05	0.627257	1.7481	349
Cdc1 Il1a Response Dn	3.89295e-07	7.78308e-06	0.674963	1.86355	283
Cdc1 Il1a Response Up	1.0128e-12	1.00701e-10	0.91012	2.08638	294
Cdc1 Il1b Response Dn	0.000667387	0.00307617	0.477271	1.68579	234
Cdc1 Il1b Response Up	1.15889e-09	5.37723e-08	0.788187	2.024	254
Cdc1 Il2 Response Dn	0.0132804	0.0334897	0.38073	1.5826	91
Cdc1 Il2 Response Up	1.56445e-09	6.80537e-08	0.788187	2.10554	179
Cdc1 Il3 Response Dn	0.00298597	0.010099	0.431708	1.81639	71
Cdc1 Il3 Response Up	0.000378453	0.00202618	0.498493	1.79507	174
Cdc1 Il33 Response Dn	0.00441679	0.0137851	0.407018	1.78948	24
Cdc1 Il33 Response Up	0.00101687	0.00436879	0.45506	1.8069	104
Cdc1 Il36a Response Dn	0.000101627	0.000744554	0.538434	1.95232	102
Cdc1 Il36a Response Up	2.18337e-05	0.000232808	0.57561	1.83048	234
Cdc1 Il7 Response Dn	0.0416	0.0839235	0.282013	1.5357	18
Cdc1 Il7 Response Up	0.01363	0.034124	0.38073	1.69089	29
Cdc1 Lif Response Dn	0.0296345	0.0628829	0.352488	1.6371	7
Cdc1 Osm Response Up	0.00292234	0.0100284	0.431708	1.77705	20
Cdc1 Scf Response Up	0.0240568	0.0534938	0.352488	1.5853	18
Cdc1 Tl1a Response Dn	0.00307766	0.0102491	0.431708	1.8047	36
Cdc1 Tl1a Response Up	0.018492	0.0439263	0.352488	1.63928	36
Cdc1 Tnfa Response Dn	1.79167e-08	5.42175e-07	0.733762	1.90582	336
Cdc1 Tnfa Response Up	6.54007e-09	2.27594e-07	0.761461	1.97021	270
Cdc1 Tslp Response Up	0.0780669	0.138963	0.21925	1.50557	5
Cdc2 Adiponectin Response Dn	0.0578947	0.10774	0.213928	1.43973	46
Cdc2 Adiponectin Response Up	6.00271e-05	0.000535626	0.557332	2.00399	36
Cdc2 Baff Response Up	0.000444148	0.00224005	0.498493	1.81279	10
Cdc2 Cardiotrophin 1 Response Dn	0.00159698	0.00610714	0.45506	1.85958	24
Cdc2 Cardiotrophin 1 Response Up	0.00295243	0.010073	0.431708	1.81296	57
Cdc2 Cd30l Response Dn	0.0556465	0.105531	0.245042	1.52237	14
Cdc2 Egf Response Up	0.111317	0.182728	0.181383	1.4505	6
Cdc2 Flt3l Response Dn	0.0830508	0.14498	0.202072	1.4776	12
Cdc2 Gm Csf Response Dn	1.54432e-12	1.34356e-10	0.91012	2.25829	85
Cdc2 Gm Csf Response Up	0.00122782	0.00508668	0.45506	1.5386	353
Cdc2 Ifna1 Response Dn	3.61824e-05	0.000354689	0.557332	1.66998	381
Cdc2 Ifnb Response Dn	4.01302e-05	0.000377441	0.557332	1.8206	218
Cdc2 Ifne Response Dn	0.0815308	0.143577	0.202072	1.48528	13
Cdc2 Ifne Response Up	4.62215e-05	0.000428935	0.557332	2.01307	57
Cdc2 Ifng Response Dn	1.35902e-08	4.43888e-07	0.74774	2.13233	128
Cdc2 Ifng Response Up	8.82698e-16	3.07179e-13	1.02767	2.03371	435
Cdc2 Ifnk Response Up	8.40135e-06	0.000104417	0.593325	2.05992	94
Cdc2 Ifnl2 Response Up	0.114202	0.186147	0.157403	1.37459	26
Cdc2 Il10 Response Dn	0.000121356	0.000861872	0.538434	1.91009	112
Cdc2 Il10 Response Up	2.02551e-07	4.69919e-06	0.690132	2.03142	165
Cdc2 Il11 Response Up	0.0211666	0.0487814	0.352488	1.62564	24
Cdc2 Il12 Response Up	1.33982e-05	0.000158054	0.593325	2.01911	101
Cdc2 Il13 Response Dn	0.000221669	0.00134158	0.518848	1.98617	55
Cdc2 Il15 Response Dn	3.40957e-05	0.000343922	0.557332	1.7971	222
Cdc2 Il15 Response Up	7.51573e-22	5.23095e-19	1.21254	2.12302	462
Cdc2 Il17e Response Up	0.00836015	0.0234306	0.38073	1.74339	13
Cdc2 Il18 Response Dn	4.19045e-06	5.8331e-05	0.610527	1.90237	213
Cdc2 Il1a Response Up	1.09643e-07	2.72542e-06	0.704976	1.791	434
Cdc2 Il1b Response Up	2.4729e-07	5.37856e-06	0.674963	1.80841	383
Cdc2 Il2 Response Dn	3.83045e-08	1.03806e-06	0.719513	2.01897	216
Cdc2 Il2 Response Up	2.61022e-10	1.51393e-08	0.814036	2.03402	261
Cdc2 Il27 Response Up	0.000153083	0.00102388	0.518848	2.0058	67
Cdc2 Il3 Response Dn	3.48038e-11	2.42235e-09	0.851339	2.23437	100
Cdc2 Il3 Response Up	0.000471957	0.00232966	0.498493	1.60111	323
Cdc2 Il33 Response Dn	0.00489659	0.0151468	0.407018	1.8451	41
Cdc2 Il33 Response Up	0.00040988	0.00212893	0.498493	1.75156	183
Cdc2 Il36a Response Dn	6.3595e-09	2.27594e-07	0.761461	1.96175	285
Cdc2 Il36a Response Up	2.82308e-09	1.1558e-07	0.774939	1.86544	413
Cdc2 Il4 Response Dn	0.00347764	0.0113105	0.431708	1.73418	17
Cdc2 Il7 Response Up	3.08461e-08	8.94536e-07	0.719513	2.13112	119
Cdc2 Leptin Response Up	0.0177986	0.0425698	0.352488	1.68045	13
Cdc2 Lif Response Dn	0.0155888	0.0379364	0.38073	1.66428	23
Cdc2 Lif Response Up	0.000536479	0.0025229	0.477271	1.861	80
Cdc2 M Csf Response Up	0.000969502	0.00419114	0.477271	1.72291	197
Cdc2 Neuropoietin Response Up	0.00307378	0.0102491	0.431708	1.75822	40
Cdc2 Noggin Response Dn	0.0562831	0.105588	0.321776	1.58602	7
Cdc2 Osm Response Dn	0.0236382	0.0530715	0.352488	1.62815	34
Cdc2 Osm Response Up	9.34274e-05	0.00069176	0.538434	1.95223	95
Cdc2 Tl1a Response Dn	0.00153177	0.0059894	0.45506	1.80749	84
Cdc2 Tl1a Response Up	0.00658125	0.0190856	0.407018	1.73896	86
Cdc2 Tnfa Response Dn	1.0035e-12	1.00701e-10	0.91012	2.02934	348
Cdc2 Tnfa Response Up	9.06068e-10	4.50445e-08	0.801216	1.82727	481
Cdc2 Tslp Response Up	0.000442835	0.00224005	0.498493	1.91761	58
Etac Ifng Response Up	0.00838248	0.0234306	0.38073	1.66533	9
Etac Il15 Response Up	0.00788929	0.0223209	0.38073	1.66915	15
Ilc Ifna1 Response Up	0.0398773	0.0811538	0.282013	1.57915	22
Ilc Ifnb Response Up	0.027842	0.0598087	0.352488	1.60181	37
Ilc Ifng Response Up	0.014404	0.0357892	0.38073	1.61878	15
Ilc Il15 Response Up	0.0221419	0.0501978	0.352488	1.58998	18
Ilc Il18 Response Up	0.0854701	0.148718	0.199915	1.47994	11
Ilc Il1a Response Up	0.0217864	0.0497415	0.352488	1.63078	29
Ilc Il1b Response Dn	0.0260005	0.0569068	0.352488	1.6042	5
Ilc Il2 Response Up	0.107417	0.178998	0.21925	-1.39283	14
Ilc Tl1a Response Up	0.0526316	0.101192	0.261664	1.54197	10
Langerhans Gm Csf Response Dn	0.000514912	0.00247158	0.477271	1.91689	57
Langerhans Gm Csf Response Up	1.44636e-05	0.000167777	0.593325	1.76815	304
Langerhans Ifna1 Response Up	0.0199675	0.0467688	0.352488	1.64791	43
Langerhans Ifng Response Up	0.0277874	0.0598087	0.352488	1.59882	77
Langerhans Il15 Response Up	0.0144494	0.0357892	0.38073	1.68657	11
Langerhans Il18 Response Dn	0.0954955	0.161715	0.193813	1.44125	9
Langerhans Il18 Response Up	0.000311832	0.00173628	0.498493	1.76363	136
Langerhans Il1a Response Dn	0.00130057	0.00532468	0.45506	1.93691	44
Langerhans Il1a Response Up	1.56542e-05	0.000176329	0.57561	1.93172	150
Langerhans Il1b Response Dn	0.000144077	0.000983114	0.518848	1.94754	92
Langerhans Il1b Response Up	0.00012852	0.000894502	0.518848	1.85237	152
Langerhans Il3 Response Up	0.023874	0.0532574	0.352488	1.65239	47
Langerhans Il36a Response Dn	0.027189	0.0589518	0.352488	1.6406	7
Langerhans Il36a Response Up	0.00849435	0.0235846	0.38073	1.78655	44
Langerhans Tnfa Response Dn	0.041411	0.0837851	0.276501	1.55675	22
Langerhans Tnfa Response Up	0.000457718	0.00229188	0.498493	1.82063	118
Langerhans Tslp Response Dn	0.124535	0.199716	0.170932	1.45798	5
Langerhans Tslp Response Up	0.00078475	0.00348059	0.477271	1.8497	98
Macrophage Cardiotrophin 1 Response Up	0.063228	0.116113	0.231127	1.52129	13
Macrophage Gm Csf Response Dn	0.0687161	0.124873	0.231127	1.52195	7
Macrophage Gm Csf Response Up	0.0115491	0.0302143	0.38073	1.70093	34
Macrophage Ifna1 Response Dn	0.0561404	0.105588	0.252961	1.53613	10
Macrophage Ifna1 Response Up	6.44382e-05	0.000558382	0.538434	1.83146	195
Macrophage Ifnb Response Up	0.00815328	0.0229744	0.38073	1.53187	239
Macrophage Ifne Response Up	0.0154885	0.0378246	0.38073	1.67293	22
Macrophage Ifng Response Dn	0.00158317	0.00608776	0.45506	1.91552	52
Macrophage Ifng Response Up	0.000126784	0.00089133	0.518848	1.85259	163
Macrophage Ifnk Response Up	0.0488127	0.0954315	0.234393	1.46725	44
Macrophage Il12 Response Up	0.00404512	0.0128222	0.407018	1.7182	15
Macrophage Il15 Response Up	4.08764e-15	9.48332e-13	0.996986	2.0695	383
Macrophage Il18 Response Dn	0.0108746	0.0289003	0.38073	1.69297	20
Macrophage Il18 Response Up	0.000196563	0.0012215	0.518848	1.94696	81
Macrophage Il1a Response Dn	0.00850536	0.0235846	0.38073	1.71997	22
Macrophage Il1a Response Up	8.77978e-05	0.000670097	0.538434	1.90771	141
Macrophage Il1b Response Dn	0.0490787	0.0956828	0.321776	1.56676	41
Macrophage Il1b Response Up	2.20766e-05	0.000232808	0.57561	1.94009	134
Macrophage Il2 Response Up	0.00703658	0.0203214	0.407018	1.81059	21
Macrophage Il3 Response Up	0.00132773	0.00537268	0.45506	1.76555	15
Macrophage Il31 Response Up	0.0785597	0.139484	0.204295	1.48037	14
Macrophage Il33 Response Up	0.106383	0.178416	0.173748	1.43771	14
Macrophage Il36a Response Up	9.12938e-05	0.000683231	0.538434	1.92888	113
Macrophage Il36ra Response Up	0.0313882	0.0662006	0.321776	1.61001	10
Macrophage Il5 Response Up	0.0946197	0.160623	0.197822	1.47091	6
Macrophage Il7 Response Up	0.000119782	0.000859468	0.538434	1.90075	119
Macrophage Leptin Response Up	0.0922242	0.157324	0.197822	1.48951	7
Macrophage Lif Response Up	0.00132103	0.00537268	0.45506	1.89848	76
Macrophage M Csf Response Up	0.0645624	0.118238	0.2114	1.46644	29
Macrophage Tnfa Response Dn	0.00993468	0.0268005	0.38073	1.76602	43
Macrophage Tnfa Response Up	1.40309e-08	4.43888e-07	0.74774	2.11734	134
Mast Cell Ifna1 Response Up	0.00179304	0.00674571	0.45506	1.75107	82
Mast Cell Ifnb Response Up	0.0110207	0.029165	0.38073	1.74899	51
Mast Cell Ifng Response Up	0.0161769	0.0390942	0.352488	1.66904	22
Mast Cell Ifnk Response Up	0.0129893	0.0329947	0.38073	1.58059	8
Mast Cell Il15 Response Up	0.00942712	0.0259339	0.38073	1.80627	26
Mast Cell Il18 Response Up	0.046875	0.092161	0.261664	1.53517	21
Mast Cell Il1b Response Up	0.0994575	0.168016	0.190023	1.46056	8
Mast Cell Il3 Response Up	0.0338598	0.0705625	0.321776	1.57759	34
Mast Cell Light Response Up	0.0759494	0.136239	0.21925	1.51499	7
Mast Cell Tgf Beta 1 Response Up	0.0426842	0.0851238	0.321776	1.61437	7
Migdc Baff Response Up	0.0250175	0.054928	0.352488	1.63583	13
Migdc Gm Csf Response Dn	0.00990602	0.0268005	0.38073	1.73051	67
Migdc Gm Csf Response Up	0.000407691	0.00212893	0.498493	1.6314	324
Migdc Ifna1 Response Dn	0.00976105	0.0265379	0.38073	1.69618	86
Migdc Ifna1 Response Up	6.73537e-05	0.000571685	0.538434	1.72151	283
Migdc Ifnb Response Up	8.8576e-05	0.000670097	0.538434	1.75796	229
Migdc Ifng Response Up	0.000309475	0.00173628	0.498493	1.84786	124
Migdc Ifnk Response Up	0.00520157	0.0159484	0.407018	1.71306	17
Migdc Il10 Response Dn	0.0732064	0.131999	0.199915	1.45659	25
Migdc Il10 Response Up	0.00603108	0.0180156	0.407018	1.74989	14
Migdc Il13 Response Dn	0.0601336	0.111608	0.276501	-1.51279	7
Migdc Il15 Response Up	0.000181761	0.0011606	0.518848	1.94869	27
Migdc Il18 Response Dn	0.120385	0.194404	0.160801	1.39845	17
Migdc Il18 Response Up	2.32699e-07	5.22448e-06	0.690132	2.07236	148
Migdc Il1a Response Dn	1.3789e-07	3.30935e-06	0.690132	1.97238	234
Migdc Il1a Response Up	2.09889e-06	3.16685e-05	0.627257	1.82476	304
Migdc Il1b Response Dn	1.07637e-06	1.78369e-05	0.643552	1.94429	205
Migdc Il1b Response Up	1.50927e-06	2.44292e-05	0.643552	1.94746	199
Migdc Il3 Response Up	3.9139e-07	7.78308e-06	0.674963	2.05658	132
Migdc Il36a Response Dn	0.000533373	0.0025229	0.477271	1.92039	28
Migdc Il36a Response Up	0.000165782	0.00106837	0.518848	1.87242	132
Migdc Il7 Response Up	0.0867993	0.150279	0.204295	1.50265	7
Migdc Lif Response Up	0.122966	0.197654	0.169571	1.42498	8
Migdc Osm Response Up	0.0216698	0.0497415	0.352488	1.65639	14
Migdc Scf Response Up	0.0338619	0.0705625	0.321776	1.56396	9
Migdc Tnfa Response Up	7.99262e-05	0.000625041	0.538434	1.90576	132
Migdc Trail Response Up	0.0108791	0.0289003	0.38073	1.71151	11
Migdc Tslp Response Up	0.00366708	0.0117617	0.431708	1.82241	74
Monocyte Gm Csf Response Dn	0.000236782	0.00142069	0.518848	2.01511	47
Monocyte Gm Csf Response Up	0.0200564	0.0467688	0.352488	1.40262	347
Monocyte Ifna1 Response Dn	0.000159145	0.00104495	0.518848	1.9536	86
Monocyte Ifna1 Response Up	3.8778e-08	1.03806e-06	0.719513	1.91921	272
Monocyte Ifnb Response Dn	0.000360119	0.00195344	0.498493	1.96299	54
Monocyte Ifnb Response Up	0.000148924	0.00100632	0.518848	1.80402	196
Monocyte Ifng Response Dn	0.00105785	0.00446221	0.45506	1.81063	11
Monocyte Ifng Response Up	6.19249e-05	0.000545566	0.538434	1.98142	84
Monocyte Il10 Response Dn	0.0135896	0.034124	0.38073	1.69238	14
Monocyte Il12 Response Up	0.0148296	0.0366007	0.38073	1.67971	10
Monocyte Il13 Response Up	0.000466841	0.00232087	0.498493	1.86205	20
Monocyte Il15 Response Dn	0.000360843	0.00195344	0.498493	1.87014	91
Monocyte Il15 Response Up	8.40561e-13	1.00701e-10	0.921426	2.20158	183
Monocyte Il18 Response Dn	0.00144338	0.00567568	0.45506	1.83743	25
Monocyte Il18 Response Up	0.000432114	0.00221141	0.498493	1.79976	158
Monocyte Il1a Response Dn	1.12451e-05	0.000137308	0.593325	2.07523	55
Monocyte Il1a Response Up	3.80843e-05	0.000363105	0.557332	1.96428	109
Monocyte Il1b Response Dn	9.90908e-07	1.72308e-05	0.643552	2.06098	115
Monocyte Il1b Response Up	7.74696e-05	0.000617565	0.538434	1.82812	181
Monocyte Il2 Response Up	0.00650617	0.0190264	0.407018	1.69017	9
Monocyte Il3 Response Dn	0.0036324	0.0117044	0.431708	1.85973	37
Monocyte Il3 Response Up	0.0116342	0.0302143	0.38073	1.6384	106
Monocyte Il33 Response Dn	0.00786475	0.0223209	0.38073	1.75059	13
Monocyte Il33 Response Up	0.035309	0.0729229	0.271289	1.47383	62
Monocyte Il36a Response Dn	7.80829e-05	0.000617565	0.538434	1.98276	99
Monocyte Il36a Response Up	1.15774e-05	0.000138929	0.593325	1.86346	218
Monocyte Il4 Response Up	0.0410798	0.0833572	0.321776	1.57962	5
Monocyte M Csf Response Dn	0.0922242	0.157324	0.197822	1.48791	7
Monocyte M Csf Response Up	0.00333228	0.0109918	0.431708	1.72565	91
Monocyte Tnfa Response Dn	2.13853e-06	3.16685e-05	0.627257	2.07681	64
Monocyte Tnfa Response Up	9.824e-12	7.59723e-10	0.875325	2.19538	153
Neutrophil Ifna1 Response Up	3.76827e-05	0.000363105	0.557332	1.95148	32
Neutrophil Ifng Response Up	0.0218691	0.0497415	0.352488	1.64034	23
Neutrophil Il15 Response Up	0.00656792	0.0190856	0.407018	1.78531	28
Neutrophil Il18 Response Up	0.00018738	0.0011856	0.518848	2.02348	45
Neutrophil Il1a Response Dn	0.0393487	0.0803129	0.266351	1.50423	39
Neutrophil Il1a Response Up	0.000769487	0.00345525	0.477271	1.909	28
Neutrophil Il1b Response Dn	6.99665e-05	0.000579722	0.538434	1.95839	68
Neutrophil Il1b Response Up	0.000162848	0.00105927	0.518848	2.01625	26
Neutrophil Il36a Response Dn	0.0776699	0.138768	0.204295	1.46966	15
Neutrophil Il36a Response Up	0.00750179	0.0215754	0.407018	1.71686	20
Neutrophil Tnfa Response Up	3.52845e-07	7.44181e-06	0.674963	2.02378	23
Nk Cell Ifna1 Response Dn	0.000154465	0.00102388	0.518848	1.75982	221
Nk Cell Ifna1 Response Up	0.00036206	0.00195344	0.498493	1.51213	457
Nk Cell Ifnb Response Dn	0.000192745	0.00120856	0.518848	1.82084	155
Nk Cell Ifnb Response Up	5.08291e-06	6.80327e-05	0.610527	1.72318	387
Nk Cell Ifne Response Up	0.00347764	0.0113105	0.431708	1.73442	17
Nk Cell Ifng Response Up	0.0541761	0.103306	0.204295	1.39772	139
Nk Cell Ifnk Response Dn	0.0352726	0.0729229	0.321776	1.59379	13
Nk Cell Ifnk Response Up	0.0718232	0.13018	0.173748	1.32932	162
Nk Cell Il10 Response Up	0.0746634	0.134278	0.179782	1.38806	78
Nk Cell Il12 Response Dn	0.00105301	0.00446221	0.45506	1.8144	117
Nk Cell Il15 Response Dn	0.000682828	0.00312663	0.477271	1.65472	275
Nk Cell Il18 Response Dn	8.89219e-10	4.50445e-08	0.801216	1.95173	307
Nk Cell Il1a Response Dn	0.0077091	0.0219899	0.407018	1.77427	37
Nk Cell Il1a Response Up	0.015256	0.0375201	0.38073	1.64717	46
Nk Cell Il1b Response Dn	0.00955139	0.0261284	0.38073	1.68062	96
Nk Cell Il1b Response Up	0.0108256	0.0289003	0.38073	1.70172	49
Nk Cell Il2 Response Dn	0.00252341	0.00887016	0.431708	1.5679	301
Nk Cell Il27 Response Up	0.0287854	0.0614558	0.352488	1.55162	38
Nk Cell Il36a Response Dn	0.00125251	0.00515827	0.45506	1.71201	5
Nk Cell Il36a Response Up	0.00300947	0.0101188	0.431708	1.80052	25
Nk Cell Il4 Response Dn	0.00517555	0.0159389	0.407018	1.89047	35
Nk Cell Il7 Response Dn	0.0532446	0.10205	0.252961	1.54935	13
Nk Cell Lif Response Up	0.107692	0.178998	0.176694	1.45714	11
Nk Cell Rankl Response Up	0.0474074	0.0929452	0.252961	1.52923	24
Nk Cell Tl1a Response Dn	0.108499	0.179799	0.181383	1.45831	7
Nk Cell Tnfa Response Dn	0.00529487	0.0160927	0.407018	1.83751	21
Nk Cell Tnfa Response Up	6.96154e-05	0.000579722	0.538434	2.00388	70
Pdc Egf Response Up	0.111317	0.182728	0.181383	1.45392	6
Pdc Flt3l Response Up	0.0112618	0.0296901	0.38073	1.64342	15
Pdc Ifna1 Response Dn	0.000348699	0.00192615	0.498493	1.81417	152
Pdc Ifna1 Response Up	3.41825e-09	1.32172e-07	0.774939	1.85885	402
Pdc Ifnb Response Dn	0.0139794	0.0348734	0.38073	1.68153	67
Pdc Ifnb Response Up	4.96435e-07	9.59774e-06	0.659444	1.88768	288
Pdc Ifne Response Up	0.00388641	0.012408	0.431708	1.85198	37
Pdc Ifng Response Up	6.49842e-05	0.000558382	0.538434	1.91759	82
Pdc Ifnk Response Dn	0.0495726	0.0963759	0.266351	1.54669	11
Pdc Ifnk Response Up	0.000769384	0.00345525	0.477271	1.82121	104
Pdc Il10 Response Dn	0.0865633	0.150245	0.170932	1.38973	52
Pdc Il10 Response Up	0.00215055	0.0078778	0.431708	1.83904	57
Pdc Il15 Response Dn	0.107438	0.178998	0.157403	1.37138	38
Pdc Il15 Response Up	6.81657e-06	8.7858e-05	0.610527	1.85778	227
Pdc Il17e Response Up	0.0777577	0.138768	0.216543	1.4849	8
Pdc Il18 Response Up	0.00141136	0.00561317	0.45506	1.89727	76
Pdc Il1a Response Up	0.000310754	0.00173628	0.498493	1.93369	71
Pdc Il1b Response Dn	0.0831135	0.14498	0.176694	1.39326	44
Pdc Il1b Response Up	4.83064e-06	6.59241e-05	0.610527	2.04957	96
Pdc Il2 Response Up	0.00630735	0.0186013	0.407018	1.76814	55
Pdc Il27 Response Up	0.0060122	0.0180156	0.407018	1.67115	6
Pdc Il3 Response Dn	0.0182334	0.0434604	0.352488	1.58474	71
Pdc Il3 Response Up	0.00105482	0.00446221	0.45506	1.54757	389
Pdc Il36a Response Dn	0.00625264	0.0185185	0.407018	1.68474	117
Pdc Il36a Response Up	9.00745e-07	1.60748e-05	0.659444	1.96089	208
Pdc Il7 Response Up	0.020159	0.0467688	0.352488	1.65152	12
Pdc Lif Response Up	0.00222224	0.00805562	0.431708	1.88446	51
Pdc Tnfa Response Dn	0.0447761	0.0887701	0.248911	1.49364	39
Pdc Tnfa Response Up	2.00352e-05	0.000217883	0.57561	1.94391	118
T Cell Cd4 Cardiotrophin 1 Response Dn	0.0604027	0.111809	0.276501	-1.53015	9
T Cell Cd4 Ifna1 Response Dn	0.00110946	0.00465172	0.45506	1.63932	251
T Cell Cd4 Ifna1 Response Up	0.000297283	0.00170999	0.498493	1.69924	259
T Cell Cd4 Ifnb Response Dn	0.000485211	0.00236223	0.498493	1.70355	203
T Cell Cd4 Ifnb Response Up	0.000785134	0.00348059	0.477271	1.60222	233
T Cell Cd4 Ifng Response Dn	0.0560579	0.105588	0.257206	1.54284	7
T Cell Cd4 Ifng Response Up	0.000903337	0.00395423	0.477271	1.79141	82
T Cell Cd4 Ifnk Response Up	0.0352021	0.0729229	0.276501	1.51944	49
T Cell Cd4 Il12 Response Up	0.0301574	0.0637979	0.352488	1.63184	26
T Cell Cd4 Il15 Response Up	0.00583545	0.0175821	0.407018	1.73465	85
T Cell Cd4 Il18 Response Up	0.00260653	0.00907073	0.431708	1.85207	77
T Cell Cd4 Il1a Response Dn	0.000646601	0.00300023	0.477271	1.81947	119
T Cell Cd4 Il1a Response Up	0.00041587	0.00214404	0.498493	1.86354	113
T Cell Cd4 Il1b Response Dn	6.71623e-06	8.7858e-05	0.610527	2.02793	102
T Cell Cd4 Il1b Response Up	0.000289149	0.00167706	0.498493	1.87393	100
T Cell Cd4 Il2 Response Dn	0.0946197	0.160623	0.197822	1.47303	6
T Cell Cd4 Il2 Response Up	0.00769234	0.0219899	0.407018	1.77096	67
T Cell Cd4 Il27 Response Up	0.0421875	0.0846182	0.276501	1.55296	20
T Cell Cd4 Il36a Response Dn	0.00541279	0.0163796	0.407018	1.65309	138
T Cell Cd4 Il36a Response Up	0.00155917	0.0060288	0.45506	1.55836	306
T Cell Cd4 Il36ra Response Dn	0.116883	0.189629	0.176694	1.44471	6
T Cell Cd4 Il4 Response Dn	0.0286638	0.0613846	0.352488	1.5723	74
T Cell Cd4 Il7 Response Dn	0.0245273	0.0541936	0.352488	1.59497	70
T Cell Cd4 Noggin Response Dn	0.0623608	0.114823	0.271289	-1.50477	8
T Cell Cd4 Tl1a Response Up	4.12233e-06	5.8331e-05	0.610527	2.03931	89
T Cell Cd4 Tnfa Response Up	2.97775e-05	0.000304782	0.57561	2.00743	84
T Cell Cd8 Ifna1 Response Dn	0.00263971	0.00914048	0.431708	1.58217	223
T Cell Cd8 Ifna1 Response Up	0.000279516	0.00163482	0.498493	1.63683	292
T Cell Cd8 Ifnb Response Dn	0.00082461	0.00363246	0.477271	1.74947	159
T Cell Cd8 Ifnb Response Up	7.56371e-05	0.000612133	0.538434	1.75715	242
T Cell Cd8 Ifne Response Up	0.00194998	0.00729668	0.45506	1.81366	30
T Cell Cd8 Ifng Response Up	0.00161088	0.00612663	0.45506	1.87337	61
T Cell Cd8 Ifnk Response Up	0.00640564	0.0188115	0.407018	1.68942	59
T Cell Cd8 Il12 Response Up	0.0533708	0.10205	0.231127	1.46587	35
T Cell Cd8 Il15 Response Dn	0.00140092	0.00560366	0.45506	1.73086	165
T Cell Cd8 Il18 Response Dn	0.00026661	0.00157255	0.498493	1.8974	98
T Cell Cd8 Il18 Response Up	0.00407501	0.0128335	0.407018	1.55849	262
T Cell Cd8 Il1a Response Dn	0.00229594	0.00823699	0.431708	1.79171	109
T Cell Cd8 Il1a Response Up	7.26189e-08	1.87196e-06	0.704976	2.0605	155
T Cell Cd8 Il1b Response Dn	0.00339794	0.0111555	0.431708	1.7172	80
T Cell Cd8 Il1b Response Up	3.57174e-05	0.000354689	0.557332	1.95473	115
T Cell Cd8 Il2 Response Dn	0.00320293	0.0106154	0.431708	1.75437	114
T Cell Cd8 Il27 Response Up	0.0153114	0.0375238	0.38073	1.68689	21
T Cell Cd8 Il36a Response Dn	0.000401149	0.00211515	0.498493	1.80044	163
T Cell Cd8 Il36a Response Up	0.0218048	0.0497415	0.352488	1.36051	399
T Cell Cd8 Il4 Response Dn	0.00526872	0.0160835	0.407018	1.64575	132
T Cell Cd8 Il7 Response Dn	0.0118349	0.0305078	0.38073	1.59358	91
T Cell Cd8 Osm Response Up	0.109402	0.180864	0.175204	1.45401	11
T Cell Cd8 Tl1a Response Up	0.000386395	0.00205291	0.498493	1.88417	23
T Cell Cd8 Tnfa Response Dn	0.0505618	0.0977528	0.237794	1.48276	35
T Cell Cd8 Tnfa Response Up	5.95658e-05	0.000535626	0.557332	2.01916	63
T Cell Gd C5a Response Dn	0.0448952	0.0887701	0.321776	-1.62333	10
T Cell Gd Decorin Response Dn	0.103672	0.174289	0.204295	-1.43303	6
T Cell Gd Fasl Response Dn	0.100726	0.169747	0.287805	-1.46099	19
T Cell Gd Ifna1 Response Dn	0.0237572	0.0531672	0.352488	1.5419	107
T Cell Gd Ifna1 Response Up	0.000766443	0.00345525	0.477271	1.6617	227
T Cell Gd Ifnb Response Dn	0.0011198	0.00466694	0.45506	1.83583	89
T Cell Gd Ifnb Response Up	0.001341	0.00539499	0.45506	1.63295	251
T Cell Gd Ifne Response Up	0.0731707	0.131999	0.197822	1.44911	29
T Cell Gd Ifng Response Up	0.0209744	0.0484989	0.352488	1.57881	85
T Cell Gd Ifnk Response Up	0.0264626	0.0577365	0.352488	1.57098	49
T Cell Gd Il12 Response Up	0.0362523	0.0744295	0.321776	1.54191	78
T Cell Gd Il13 Response Dn	0.0201536	0.0467688	0.352488	-1.73729	12
T Cell Gd Il15 Response Dn	0.116337	0.189183	0.142057	1.32208	67
T Cell Gd Il15 Response Up	0.0890688	0.153445	0.147331	1.22212	390
T Cell Gd Il18 Response Dn	0.00360538	0.0116714	0.431708	1.76067	106
T Cell Gd Il18 Response Up	0.0101902	0.0273838	0.38073	1.39387	430
T Cell Gd Il1a Response Dn	5.94008e-05	0.000535626	0.557332	1.72299	279
T Cell Gd Il1b Response Dn	2.42124e-05	0.00025152	0.57561	1.75666	283
T Cell Gd Il1b Response Up	0.02688	0.0584641	0.352488	1.32275	470
T Cell Gd Il2 Response Dn	0.0559611	0.105588	0.208955	1.413	87
T Cell Gd Il2 Response Up	0.050813	0.0979664	0.199915	1.29504	354
T Cell Gd Il21 Response Up	0.0817791	0.143577	0.186433	1.41971	31
T Cell Gd Il23 Response Dn	0.0550459	0.104677	0.21925	1.4694	50
T Cell Gd Il27 Response Up	0.0125568	0.0320129	0.38073	1.75786	31
T Cell Gd Il3 Response Dn	0.0623608	0.114823	0.271289	-1.50498	7
T Cell Gd Il30 Response Dn	0.113586	0.185577	0.197822	-1.41547	8
T Cell Gd Il36a Response Dn	0.0222668	0.0503172	0.352488	1.61701	78
T Cell Gd Il36a Response Up	0.11191	0.183269	0.130777	1.23076	298
T Cell Gd Il7 Response Dn	0.0095729	0.0261284	0.38073	1.62938	152
T Cell Gd Lif Response Dn	0.118534	0.19186	0.190023	-1.35054	5
T Cell Gd Noggin Response Dn	0.08	0.141679	0.271289	-1.40004	22
T Cell Gd Osm Response Dn	0.0360027	0.0741358	0.321776	-1.63008	13
T Cell Gd Osm Response Up	0.0565724	0.105845	0.245042	1.5276	13
T Cell Gd Tl1a Response Dn	0.00435843	0.0136643	0.407018	1.75585	70
T Cell Gd Tl1a Response Up	0.00619599	0.0184291	0.407018	1.65748	152
T Cell Gd Tnfa Response Up	0.00020698	0.00126367	0.518848	1.96097	57
T Cell Gd Tslp Response Up	0.0439716	0.0874407	0.257206	1.5101	33
Treg Baff Response Dn	0.091314	0.156901	0.222056	-1.46261	8
Treg Cd40l Response Up	0.0667904	0.121691	0.237794	1.503	6
Treg Ifna1 Response Dn	0.0322902	0.0678972	0.321776	1.49174	134
Treg Ifna1 Response Up	0.00196049	0.00729679	0.431708	1.66543	183
Treg Ifnb Response Dn	0.0187935	0.0443398	0.352488	1.6205	67
Treg Ifnb Response Up	0.00247039	0.00872786	0.431708	1.63309	184
Treg Ifne Response Dn	0.0292855	0.0623325	0.352488	-1.60312	9
Treg Ifne Response Up	0.0418712	0.0842265	0.321776	1.58274	27
Treg Ifng Response Up	0.042555	0.08511	0.321776	1.56037	52
Treg Ifnk Response Dn	0.0885529	0.152935	0.222056	-1.46457	6
Treg Ifnk Response Up	0.0161607	0.0390942	0.352488	1.59712	55
Treg Il Y Response Dn	0.0818966	0.143577	0.231127	-1.43216	5
Treg Il12 Response Up	0.0176204	0.042289	0.352488	1.65387	24
Treg Il15 Response Up	0.0123197	0.0315239	0.38073	1.4652	211
Treg Il18 Response Up	0.000308771	0.00173628	0.498493	1.85368	127
Treg Il1a Response Dn	6.37267e-07	1.1672e-05	0.659444	2.05299	125
Treg Il1a Response Up	0.00239136	0.00853531	0.431708	1.64889	164
Treg Il1b Response Dn	7.4383e-06	9.41283e-05	0.610527	2.03094	83
Treg Il1b Response Up	0.00292494	0.0100284	0.431708	1.70182	128
Treg Il1ra Response Dn	0.0818966	0.143577	0.231127	-1.43216	5
Treg Il2 Response Dn	0.004053	0.0128222	0.407018	1.81768	50
Treg Il2 Response Up	0.00877804	0.0242441	0.38073	1.49116	313
Treg Il36a Response Dn	0.00061878	0.00289041	0.477271	1.87462	30
Treg Il36a Response Up	0.0116102	0.0302143	0.38073	1.48661	275
Treg Lif Response Up	0.0576208	0.107518	0.257206	1.52673	5
Treg Osm Response Dn	0.107759	0.178998	0.199915	-1.38491	5
Treg Osm Response Up	0.0647249	0.118238	0.224966	1.50629	15
Treg Tl1a Response Up	0.00227814	0.00821547	0.431708	1.74213	139
Treg Tnfa Response Dn	0.00475121	0.0147627	0.407018	1.81117	46
Treg Tnfa Response Up	0.000932429	0.00405606	0.477271	1.76901	140

## Sheet: cortex_Hagenaeur_Brain
pathway	pval	padj	log2err	NES	size
"Gemma_GSE100236_RNA_sequencing_of_whole,_ventral_and_dorsal_hippocampus_after_different_stress_conditions_treatment_novelty.stress_Up"	0.00330125	0.0236071	0.431708	1.77199	97
"Gemma_GSE100236_RNA_sequencing_of_whole,_ventral_and_dorsal_hippocampus_after_different_stress_conditions_treatment_restraint.stress_Up"	0.00192533	0.0160373	0.45506	1.83708	94
"Gemma_GSE100236_RNA_sequencing_of_whole,_ventral_and_dorsal_hippocampus_after_different_stress_conditions_treatment_swim.stress_Up"	0.00182716	0.0154428	0.45506	1.8486	83
"Gemma_GSE139684_Transcriptional_profiling_of_astrocytes_in_the_prefrontal_cortex,_hippocampus,_accumbens_nucleus_and_caudate_putamen_of_a_Aldh1l1-TRAP_(JD130)_mouse_line_after_chronic_social_defeat_stress_treatment_Stress_Up"	0.000303598	0.00328753	0.498493	-1.48776	267
"Gemma_GSE8641_Rnf41_is_associated_with_anxiety_like_behavior,_major_depression_and_beta_carboline_induced_seizure_-_GPL339_StrainOrLine_A.J_Down"	0.0583468	0.193131	0.237794	1.51873	18
"Gemma_GSE8641_Rnf41_is_associated_with_anxiety_like_behavior,_major_depression_and_beta_carboline_induced_seizure_-_GPL339_StrainOrLine_C10.Congenic.A.B6chr10._C57BL.6_A.J_Down"	0.0507737	0.180096	0.321776	-1.30166	70
"Gemma_GSE8641_Rnf41_is_associated_with_anxiety_like_behavior,_major_depression_and_beta_carboline_induced_seizure_-_GPL340_StrainOrLine_A.J_Down"	0.0583468	0.193131	0.237794	1.51873	18
"Gemma_GSE8641_Rnf41_is_associated_with_anxiety_like_behavior,_major_depression_and_beta_carboline_induced_seizure_-_GPL340_StrainOrLine_C10.Congenic.A.B6chr10._C57BL.6_A.J_Down"	0.0507737	0.180096	0.321776	-1.30166	70
BALLIF_DEVELOPMENTAL_DISABILITY_P16_P12_DELETION	0.0540541	0.186241	0.261664	1.55014	9
BLALOCK_ALZHEIMERS_DISEASE_INCIPIENT_UP	0.018116	0.0903415	0.352488	1.39135	311
Birt_Hagenauer_2020_BredLowRespondersToNovelty_Upregulated_HC	0.00761078	0.0469022	0.407018	1.65048	98
CHESLER_BRAIN_HIGHEST_GENETIC_VARIANCE	0.0474548	0.172109	0.321776	-1.50131	29
COATES_MACROPHAGE_M1_VS_M2_DN	0.0140796	0.0746317	0.38073	1.72698	61
COATES_MACROPHAGE_M1_VS_M2_UP	0.0184033	0.0911746	0.352488	1.60348	74
Cembrowski_HippoSeq_dg_d-dg_v__VS__ca4-ca3_d-ca3_v-ca2-ca1_d-ca1_v	0.0293304	0.128812	0.352488	-1.50577	32
DESCARTES_FETAL_CEREBELLUM_MICROGLIA	1e-50	1.08286e-48		2.58063	373
DESCARTES_FETAL_CEREBELLUM_VASCULAR_ENDOTHELIAL_CELLS	0.000658195	0.00656462	0.477271	1.52811	408
DESCARTES_FETAL_CEREBRUM_INHIBITORY_NEURONS	0.0423457	0.159692	0.321776	-1.49765	25
DESCARTES_FETAL_CEREBRUM_MICROGLIA	5.45287e-44	3.75753e-42	1.72683	2.50949	261
DESCARTES_FETAL_CEREBRUM_SKOR2_NPSR1_POSITIVE_CELLS	0.0370608	0.15097	0.321776	-1.46102	32
DESCARTES_FETAL_CEREBRUM_VASCULAR_ENDOTHELIAL_CELLS	0.00467604	0.0310916	0.407018	1.4816	360
DESCARTES_FETAL_EYE_CORNEAL_AND_CONJUNCTIVAL_EPITHELIAL_CELLS	0.000205278	0.00243126	0.518848	1.85108	129
DESCARTES_FETAL_EYE_MICROGLIA	2.64877e-30	1.67314e-28	1.43181	2.49463	109
DESCARTES_FETAL_EYE_PDE11A_FAM19A2_POSITIVE_CELLS	0.00204361	0.0164793	0.431708	-1.93198	14
DESCARTES_FETAL_EYE_RETINAL_PIGMENT_CELLS	0.00369212	0.0261554	0.431708	-1.73373	45
DESCARTES_FETAL_EYE_SKELETAL_MUSCLE_CELLS	0.00931858	0.0539878	0.38073	-1.48035	86
DESCARTES_FETAL_EYE_VASCULAR_ENDOTHELIAL_CELLS	0.0118751	0.0657033	0.38073	1.69786	68
DESCARTES_MAIN_FETAL_ENS_NEURONS	0.00212153	0.0167513	0.431708	-1.51694	194
DESCARTES_MAIN_FETAL_INHIBITORY_NEURONS	0.0423457	0.159692	0.321776	-1.49765	25
DESCARTES_MAIN_FETAL_MICROGLIA	1e-50	1.08286e-48		2.54876	433
DESCARTES_MAIN_FETAL_MYELOID_CELLS	1e-50	1.08286e-48		2.54343	334
DESCARTES_MAIN_FETAL_SCHWANN_CELLS	0.0422367	0.159692	0.321776	-1.25093	164
DESCARTES_MAIN_FETAL_VISCERAL_NEURONS	1.55737e-06	2.54506e-05	0.643552	-1.80898	217
DURANTE_ADULT_OLFACTORY_NEUROEPITHELIUM_BOWMANS_GLAND	0.0204885	0.0989192	0.352488	1.59394	8
DURANTE_ADULT_OLFACTORY_NEUROEPITHELIUM_B_CELLS	0.00410518	0.0280336	0.407018	1.88306	20
DURANTE_ADULT_OLFACTORY_NEUROEPITHELIUM_CD4_T_CELLS	0.00183358	0.0154428	0.45506	1.895	15
DURANTE_ADULT_OLFACTORY_NEUROEPITHELIUM_CD8_T_CELLS	0.000257979	0.0028757	0.498493	1.97536	32
DURANTE_ADULT_OLFACTORY_NEUROEPITHELIUM_DENDRITIC_CELLS	1.49567e-19	7.55811e-18	1.14219	2.38066	86
DURANTE_ADULT_OLFACTORY_NEUROEPITHELIUM_IMMATURE_NEURONS	0.000564599	0.00570621	0.477271	-1.62226	117
DURANTE_ADULT_OLFACTORY_NEUROEPITHELIUM_MACROPHAGES	4.69039e-16	1.87122e-14	1.02767	2.33334	61
DURANTE_ADULT_OLFACTORY_NEUROEPITHELIUM_MAST_CELLS	0.00114009	0.0104119	0.45506	1.91908	58
DURANTE_ADULT_OLFACTORY_NEUROEPITHELIUM_MATURE_NEURONS	0.000152099	0.00183001	0.518848	-1.64774	146
DURANTE_ADULT_OLFACTORY_NEUROEPITHELIUM_MONOCYTES	1.97651e-06	3.12125e-05	0.627257	2.08065	26
DURANTE_ADULT_OLFACTORY_NEUROEPITHELIUM_NK_CELLS	1.79521e-08	4.12353e-07	0.733762	2.17803	43
DURANTE_ADULT_OLFACTORY_NEUROEPITHELIUM_PERICYTES	0.0150731	0.0782562	0.38073	1.66915	67
DURANTE_ADULT_OLFACTORY_NEUROEPITHELIUM_RESPIRATORY_SECRETORY_CELLS	0.0230476	0.103989	0.352488	1.61083	9
DURANTE_ADULT_OLFACTORY_NEUROEPITHELIUM_UNSPECIFIED	0.0577048	0.192688	0.321776	-1.50121	19
DURANTE_ADULT_OLFACTORY_NEUROEPITHELIUM_VASCULAR_SMOOTH_MUSCLE_CELLS	0.0219256	0.101339	0.352488	1.58878	73
DropViz_HC_Endothelial_Flt1_cluster-markers.csv	2.1816e-06	3.3748e-05	0.627257	1.90191	214
DropViz_HC_Interneuron_Gad2_cluster-markers.csv	0.0061309	0.0393832	0.407018	-1.68305	45
DropViz_HC_Microglia_Macrophage_C1qb_cluster-markers.csv	1e-50	1.08286e-48		2.63413	192
DropViz_HC_Mural_Rgs5Acta2_cluster-markers.csv	0.0100458	0.0572537	0.38073	1.57285	154
DropViz_HC_Neuron_Subiculum_Slc17a6_cluster-markers.csv	0.0593623	0.195637	0.321776	-1.41378	43
DropViz_STR_Endothelial_Flt1_cluster-markers.csv	4.69953e-06	6.98479e-05	0.610527	1.86396	211
DropViz_STR_Microglia_Macrophage_C1qb_cluster-markers.csv	1e-50	1.08286e-48		2.61386	177
DropViz_STR_Mural_Rgs5Acta2_cluster-markers.csv	0.00201949	0.0164599	0.431708	1.6296	175
Endothelial_All_Daneman_PLOS_2010	0.0463853	0.169855	0.321776	1.57078	31
Endothelial_All_Darmanis_PNAS_2015	0.0228458	0.103989	0.352488	1.5639	13
Endothelial_All_Zeisel_Science_2015	0.0117294	0.0653739	0.38073	1.45892	268
FAN_EMBRYONIC_CTX_BIG_GROUPS_BRAIN_ENDOTHELIAL	0.0206358	0.0989997	0.352488	1.36836	318
FAN_EMBRYONIC_CTX_BIG_GROUPS_BRAIN_IMMUNE	2.7126e-12	7.90827e-11	0.898671	2.27939	106
FAN_EMBRYONIC_CTX_BIG_GROUPS_CAJAL_RETZIUS	1.89643e-05	0.000256695	0.57561	-1.51431	406
FAN_EMBRYONIC_CTX_BIG_GROUPS_EXCITATORY_NEURON	0.0467523	0.170376	0.321776	-1.47324	41
FAN_EMBRYONIC_CTX_BIG_GROUPS_GLIAL	0.0360273	0.148417	0.321776	-1.27108	120
FAN_EMBRYONIC_CTX_BIG_GROUPS_MICROGLIA	5.03253e-48	4.23851e-46	1.80883	2.49471	312
FAN_EMBRYONIC_CTX_BRAIN_B_CELL	2.73105e-05	0.000363181	0.57561	2.02211	62
FAN_EMBRYONIC_CTX_BRAIN_EFFECTOR_T_CELL	0.000239994	0.00275629	0.518848	1.98291	72
FAN_EMBRYONIC_CTX_BRAIN_MYELOID	6.58578e-12	1.8489e-10	0.887075	2.24432	100
FAN_EMBRYONIC_CTX_BRAIN_NAIVE_LIKE_T_CELL	0.000402798	0.00412596	0.498493	1.83952	102
FAN_EMBRYONIC_CTX_EX_1_EXCITATORY_NEURON	0.0144828	0.0762359	0.38073	1.58942	5
FAN_EMBRYONIC_CTX_EX_2_EXCITATORY_NEURON	0.00270046	0.0202668	0.431708	-1.9121	14
FAN_EMBRYONIC_CTX_MICROGLIA_3	0.000253198	0.00286454	0.498493	1.81476	17
FAN_EMBRYONIC_CTX_OPC	0.0058245	0.0377348	0.407018	-1.67677	49
FLORIO_NEOCORTEX_BASAL_RADIAL_GLIA_UP	0.00236947	0.0183271	0.431708	1.64821	197
FRASOR_RESPONSE_TO_ESTRADIOL_DN	0.0554124	0.190057	0.216543	1.46461	58
Gandal_2018_AlcoholAbuseDisorder_Downregulated_Cortex	0.00140751	0.0127011	0.45506	-1.49251	209
Gandal_2018_AutismSpectrumDisorder_Downregulated_Cortex	7.68477e-09	1.91318e-07	0.74774	-1.63646	483
Gandal_2018_AutismSpectrumDisorder_Upregulated_Cortex	6.76999e-15	2.44364e-13	0.996986	2.0203	397
Gandal_2018_BipolarDisorder_Downregulated_PFC	0.0508668	0.180096	0.321776	-1.25836	86
Gandal_2018_Schizophrenia_Downregulated_PFC	8.77023e-07	1.51087e-05	0.659444	-1.6328	422
Gandal_2018_Schizophrenia_Upregulated_Cortex	7.74242e-06	0.000108681	0.593325	1.69403	368
Gandal_2018_Schizophrenia_Upregulated_PFC	1.28349e-08	3.04028e-07	0.74774	1.96838	252
Gemma_GSE102965_Learned_Helplessness_Regulates_Synapse_Related_LncRNAs_in_Mouse_Hippocampus_treatment_learned.helplessness.training_Up	0.00449839	0.0301751	0.407018	-1.84564	19
Gemma_GSE102965_Learned_Helplessness_Regulates_Synapse_Related_LncRNAs_in_Mouse_Hippocampus_treatment_nonlearned.helplessness.training_Up	0.00668559	0.0425855	0.407018	-1.77459	18
Gemma_GSE109315_Gene_expression_analysis_of_mouse_brain_regions_after_chronic_social_defeat_stress_(CSDS)_phenotype_resilient.to.chronic.social.defeat.stress_Down	3.60307e-08	7.80322e-07	0.719513	-1.752	378
Gemma_GSE109315_Gene_expression_analysis_of_mouse_brain_regions_after_chronic_social_defeat_stress_(CSDS)_phenotype_susceptible.to.chronic.social.defeat.stress_Down	2.07129e-08	4.61777e-07	0.733762	-1.82326	316
Gemma_GSE113796_mRNA-Seq_of_mouse_Mettl3_cKO_and_Fto_cKO_hippocampus_after_fear_conditioning_genotype_Homozygous.negative_Fto.mouse.fat.mass.and.obesity.associated_Up	0.0110153	0.0618487	0.38073	-1.69966	35
Gemma_GSE117758_Cell-type_specific_transcriptional_profiling_of_glucocorticoid_receptor-dependent_changes_in_the_nucleus_accumbens_cell_type_treatment_astrocyte_Down	0.0411939	0.159254	0.321776	1.60806	24
Gemma_GSE117758_Cell-type_specific_transcriptional_profiling_of_glucocorticoid_receptor-dependent_changes_in_the_nucleus_accumbens_cell_type_treatment_astrocyte_Up	0.0403883	0.159254	0.321776	1.61115	39
Gemma_GSE117758_Cell-type_specific_transcriptional_profiling_of_glucocorticoid_receptor-dependent_changes_in_the_nucleus_accumbens_cell_type_treatment_dexamethasone_Up	0.00167859	0.0144588	0.45506	1.91398	44
Gemma_GSE117758_Cell-type_specific_transcriptional_profiling_of_glucocorticoid_receptor-dependent_changes_in_the_nucleus_accumbens_cell_type_treatment_neuron_Down	0.00235497	0.0183271	0.431708	1.91754	30
Gemma_GSE117758_Cell-type_specific_transcriptional_profiling_of_glucocorticoid_receptor-dependent_changes_in_the_nucleus_accumbens_treatment_dexamethasone_Up	6.95636e-07	1.22626e-05	0.659444	2.08177	86
Gemma_GSE12284_Gene_expression_changes_in_LPS-induced_neuroinflammation_Treatment_lipopolysaccharide_Up	0.00211783	0.0167513	0.431708	1.86988	14
Gemma_GSE126678_Enduring_and_sex-specific_changes_in_hippocampal_gene_expression_after_subchronic_immune_challenge_treatment_Long.term.subchronic.immune.challenge.acute.immune.challenge_lipopolysaccharide_lipopolysaccharide_Up	0.00163153	0.0142149	0.45506	1.954	28
Gemma_GSE126678_Enduring_and_sex-specific_changes_in_hippocampal_gene_expression_after_subchronic_immune_challenge_treatment_lipopolysaccharide_Acute.immune.challenge._vehicle_Up	0.000850432	0.00805784	0.477271	1.9259	29
Gemma_GSE132930_Transcriptional_profiling_reveals_running_promotes_cerebrovascular_remodeling_in_young_but_not_midlife_mice_treatment_running_Down	0.0217101	0.100959	0.352488	1.68333	49
Gemma_GSE149195_Sequencing_to_determine_the_effect_of_neuronal_IL-1b_receptor_knockout_on_the_stress_effect_of_paired_fighting_social_defeat_in_mice_treatment_Stress_Up	0.000913835	0.00855169	0.477271	1.91797	18
Gemma_GSE20388_Expression_Profiling_of_a_Genetic_Animal_Model_of_Depression_StrainOrLine_diisopropyl.fluorophosphate_Flinders.sensitive.rat_Sprague.Dawley_sensitive.toward_Down	0.0511111	0.180096	0.208955	1.41937	141
Gemma_GSE23182_Systemic_inflammation_modulates_Fc_receptor_expression_on_microglia_in_chronic_neurodegeneration_Treatment_lipopolysaccharide_Down	0.0451031	0.166048	0.24134	1.49145	58
Gemma_GSE23182_Systemic_inflammation_modulates_Fc_receptor_expression_on_microglia_in_chronic_neurodegeneration_Treatment_lipopolysaccharide_Up	9.45526e-15	3.25777e-13	0.986546	2.28131	151
Gemma_GSE23182_Systemic_inflammation_modulates_Fc_receptor_expression_on_microglia_in_chronic_neurodegeneration_disease_prion.disease_Down	1.19243e-21	6.95276e-20	1.20398	-2.41556	351
Gemma_GSE30187_Expression_data_in_the_mouse_brain_following_the_glucocorticoid_receptor_overexpression_in_the_forebrain_(GRov)_during_different_periods_in_development_genotype_Overexpression_Nr3c1.mouse.nuclear.receptor.subfamily.3.group.C.member.1_Down	0.0315671	0.136731	0.271289	1.53626	133
Gemma_GSE34424_The_Influence_of_Sleep_Deprivation_on_Hippocampal_CA1_Gene_Expression:_Relation_to_Stress_and_Aging_treatment_novel.environment.stress_72.h_Down	0.0573427	0.192536	0.222056	1.46798	40
Gemma_GSE34424_The_Influence_of_Sleep_Deprivation_on_Hippocampal_CA1_Gene_Expression:_Relation_to_Stress_and_Aging_treatment_sleep.deprivation_72.h_Up	0.0451264	0.166048	0.321776	1.51905	29
Gemma_GSE47847_Early_life_stress_in_fathers_impairs_synaptic_plasticity_in_the_offspring_-__brain_collected_after_acute_swim_stress_environmental_history_offspring.of.fathers.exposed.to.maternal.unpredictable.separation.stress_Up	0.028995	0.128528	0.352488	-1.17292	323
Gemma_GSE47847_Early_life_stress_in_fathers_impairs_synaptic_plasticity_in_the_offspring_-__brain_collected_after_acute_swim_stress_treatment_acute.swim.stress_Down	0.0574053	0.192536	0.199915	1.43033	112
Gemma_GSE47847_Early_life_stress_in_fathers_impairs_synaptic_plasticity_in_the_offspring_-__brain_collected_after_acute_swim_stress_treatment_acute.swim.stress_Up	0.037643	0.15097	0.321776	-1.16987	282
Gemma_GSE50423_Contextual_fear_conditioning_in_the_mouse_hippocampus_timepoint_24.h_Down	0.0375691	0.15097	0.245042	1.4521	152
Gemma_GSE59070_Effect_of_acute_and_chronic_social_stress_on_hippocampal_transcriptome_in_mice._timepoint_13.d_Up	0.00825033	0.0495893	0.38073	1.78344	16
Gemma_GSE59070_Effect_of_acute_and_chronic_social_stress_on_hippocampal_transcriptome_in_mice._timepoint_8.d_Up	0.0134575	0.0718365	0.38073	1.76114	18
Gemma_GSE63412_RNA-seq_analysis_of_contextual_fear_conditioning_treatment_fear.conditioning_Up	0.0571932	0.192536	0.321776	-1.59086	11
Gemma_GSE63412_RNA-seq_analysis_of_contextual_fear_conditioning_treatment_memory.retrieval_Up	0.0571932	0.192536	0.321776	-1.59086	11
Gemma_GSE71527_RGS9-2-controlled_adaptations_in_the_striatum_determine_the_onset_of_action_and_eficacy_of_antidepressants_in_neuropathic_pain_states_genotype_Rgs9.mouse.regulator.of.G.protein.signaling.9_Homozygous.negative_Up	0.0224136	0.102967	0.352488	1.58021	8
Gemma_GSE72343_Circuit-wide_transcriptional_profiling_reveals_region_specific_gene_co-expression_networks_regulating_depression_susceptibility_phenotype_resilient_Up	1.52136e-12	4.61276e-11	0.91012	2.20379	34
Gemma_GSE72343_Circuit-wide_transcriptional_profiling_reveals_region_specific_gene_co-expression_networks_regulating_depression_susceptibility_phenotype_susceptible_Up	1.52136e-12	4.61276e-11	0.91012	2.20379	34
Gemma_GSE72343_Circuit-wide_transcriptional_profiling_reveals_region_specific_gene_co-expression_networks_regulating_depression_susceptibility_timepoint_28.d_chronic.social.defeat.stress_Up	0.00110674	0.0102306	0.45506	1.55378	349
Gemma_GSE73798_Molecular_profile_of_ketamine_in_comparison_to_memantine_and_phencyclidyne_and_other_psychotropic_drugs_[mouse_hippocampus]_timepoint_1.hour_Up	0.0374396	0.15097	0.257206	1.48659	89
Gemma_GSE73798_Molecular_profile_of_ketamine_in_comparison_to_memantine_and_phencyclidyne_and_other_psychotropic_drugs_[mouse_hippocampus]_timepoint_2.hours_Up	0.0338573	0.143373	0.271289	1.49931	86
Gemma_GSE73798_Molecular_profile_of_ketamine_in_comparison_to_memantine_and_phencyclidyne_and_other_psychotropic_drugs_[mouse_hippocampus]_timepoint_8.hours_Up	0.0131842	0.0708767	0.38073	1.68506	68
Gemma_GSE73798_Molecular_profile_of_ketamine_in_comparison_to_memantine_and_phencyclidyne_and_other_psychotropic_drugs_[mouse_hippocampus]_treatment_15.mg.kg_memantine_Up	0.0120725	0.0663112	0.38073	1.84526	26
Gemma_GSE73798_Molecular_profile_of_ketamine_in_comparison_to_memantine_and_phencyclidyne_and_other_psychotropic_drugs_[mouse_hippocampus]_treatment_20.mg.kg_ketamine_Up	0.0163447	0.0831496	0.352488	1.74037	20
Gemma_GSE73798_Molecular_profile_of_ketamine_in_comparison_to_memantine_and_phencyclidyne_and_other_psychotropic_drugs_[mouse_hippocampus]_treatment_5.mg.kg_phencyclidine_Up	0.0108281	0.0612517	0.38073	1.84299	21
Gemma_GSE81672_Ketamine_and_Imipramine_Reverse_Transcriptional_Signatures_of_Susceptibility_and_Induce_Resilience-Specific_Gene_Expression_Profiles_HC_treatment_imipramine_Up	0.061082	0.19957	0.24134	1.48458	13
Gemma_GSE81672_Ketamine_and_Imipramine_Reverse_Transcriptional_Signatures_of_Susceptibility_and_Induce_Resilience-Specific_Gene_Expression_Profiles_HC_treatment_ketamine_Down	0.0328883	0.141644	0.321776	1.57387	15
Gemma_GSE81672_Ketamine_and_Imipramine_Reverse_Transcriptional_Signatures_of_Susceptibility_and_Induce_Resilience-Specific_Gene_Expression_Profiles_NACC_treatment_ketamine_Up	0.0440672	0.164547	0.321776	-1.58242	14
Gemma_GSE84302_RNA_sequencing_to_identify_common_targets_for_GSK3_treatment_10.ug.5.uL.nostril_siRNA_Knockdown_Gsk3b.mouse.glycogen.synthase.kinase.3.beta_Up	0.0438144	0.164413	0.245042	1.50069	58
Gemma_GSE84302_RNA_sequencing_to_identify_common_targets_for_GSK3_treatment_Knockdown_ketamine_Gsk3b.mouse.glycogen.synthase.kinase.3.beta_gsk3.inhibitor._10.mg.kg_Up	0.0266712	0.119626	0.352488	1.55476	56
Gemma_GSE84302_RNA_sequencing_to_identify_common_targets_for_GSK3_treatment_gsk3.inhibitor_L803.mts_Knockdown_Gsk3b.mouse.glycogen.synthase.kinase.3.beta_60.ug.5.uL.nostril_Up	0.048906	0.176528	0.231127	1.48645	60
GeneWeaver_Andrus_2012_GS380536_Differential Expression of Genes Between NS and CRS Rats in the Hippocampus_Top25_byPval	0.00816647	0.0495215	0.38073	-1.74129	23
GeneWeaver_Diaz2011_GS137248_Hippocampal genes differentially expressed between GF and SPF mice_Top25_byEffect	0.00489545	0.0322674	0.407018	1.8289	16
GeneWeaver_LoIaocona_2016_GS400101_Down-regulated genes in S-S (Social Stress) mice_Top25_byPval	0.0038573	0.0268242	0.431708	-1.81397	20
GeneWeaver_Rodd_2008_GS75564_Genes that were different in the nucleus accumbens of iP rats between the saccharin and water groups_Up_Pval01_Top25LogFC	0.00289519	0.0215153	0.431708	1.91808	23
Gray_2014_ChronicRestraintAndForcedSwimStress_Downregulated_HC	0.0353535	0.147242	0.24134	1.27938	484
Gray_2014_ForcedSwimStress_Upregulated_HC	0.00422658	0.0286049	0.407018	1.81509	66
HAY_BONE_MARROW_CD34_POS_EO_B_MAST	0.0152634	0.0786041	0.38073	1.62244	8
HAY_BONE_MARROW_CD34_POS_ERP_EARLY	0.00377188	0.026473	0.431708	-1.83143	9
HAY_BONE_MARROW_CD34_POS_MKP	0.0336022	0.143139	0.287857	1.5942	51
HAY_BONE_MARROW_CD8_T_CELL	0.0209366	0.0998108	0.352488	1.76515	39
HAY_BONE_MARROW_DENDRITIC_CELL	0.00942349	0.0541137	0.38073	1.65699	137
HAY_BONE_MARROW_FOLLICULAR_B_CELL	0.00714196	0.0451134	0.407018	1.6606	91
HAY_BONE_MARROW_IMMATURE_NEUTROPHIL	1.3623e-07	2.79088e-06	0.690132	2.01513	160
HAY_BONE_MARROW_MONOCYTE	3.60765e-17	1.51922e-15	1.06721	2.28753	164
HAY_BONE_MARROW_NAIVE_T_CELL	0.0364204	0.149225	0.24134	1.36525	266
HAY_BONE_MARROW_NEUTROPHIL	6.81562e-13	2.24619e-11	0.921426	2.0077	358
HAY_BONE_MARROW_NK_CELLS	0.00149849	0.0132076	0.45506	1.58412	246
HAY_BONE_MARROW_PLASMA_CELL	0.0413892	0.159254	0.321776	-1.4237	69
HU_FETAL_RETINA_AMACRINE	0.0421309	0.159692	0.321776	-1.44433	49
HU_FETAL_RETINA_FIBROBLAST	0.0150223	0.0782562	0.38073	1.39438	333
HU_FETAL_RETINA_HORIZONTAL	0.0187737	0.0917951	0.352488	-1.63957	26
HU_FETAL_RETINA_MICROGLIA	1.39165e-50	1.31859e-48	1.85405	2.51053	306
HU_FETAL_RETINA_RGC	3.17651e-10	8.30274e-09	0.814036	-1.85896	370
HU_FETAL_RETINA_RPC	0.0533714	0.184728	0.321776	-1.35678	78
JIANG_AGING_CEREBRAL_CORTEX_DN	0.00742071	0.0461057	0.407018	-1.70422	44
JIANG_AGING_HYPOTHALAMUS_DN	0.0187268	0.0917951	0.352488	-1.54753	34
JOHANSSON_BRAIN_CANCER_EARLY_VS_LATE_DN	0.0360111	0.148417	0.282013	1.5695	41
JOHANSSON_GLIOMAGENESIS_BY_PDGFB_DN	0.00035405	0.0036763	0.498493	-1.96524	20
JOHANSSON_GLIOMAGENESIS_BY_PDGFB_UP	0.040817	0.159254	0.321776	1.58301	48
JOHNSTONE_PARVB_TARGETS_3_UP	3.01286e-05	0.00039375	0.57561	1.68936	361
Johnson_2016_Coexpression_Hippocampus_Human_M10	0.0003482	0.00366577	0.498493	-1.95893	40
Johnson_2016_Coexpression_Hippocampus_Human_M11	0.000766565	0.00744944	0.477271	-1.64556	121
Johnson_2016_Coexpression_Hippocampus_Human_M13	0.000803089	0.00770559	0.477271	-1.57532	116
Johnson_2016_Coexpression_Hippocampus_Human_M14	5.43473e-07	1.00476e-05	0.659444	2.08655	91
Johnson_2016_Coexpression_Hippocampus_Human_M18	0.0216124	0.100959	0.352488	1.68599	27
Johnson_2016_Coexpression_Hippocampus_Human_M19	0.00305397	0.0224748	0.431708	-1.32102	428
Johnson_2016_Coexpression_Hippocampus_Human_M2	0.0449725	0.166048	0.321776	-1.43876	31
Johnson_2016_Coexpression_Hippocampus_Human_M21	0.00408771	0.0280336	0.407018	1.76311	80
Johnson_2016_Coexpression_Hippocampus_Human_M23	2.26989e-19	1.07536e-17	1.13309	2.39772	106
Johnson_2016_Coexpression_Hippocampus_Human_M3	0.0083085	0.0495893	0.38073	-1.3851	126
Johnson_2016_Coexpression_Hippocampus_Human_M5	1.28821e-05	0.000177539	0.593325	-1.88073	121
KIM_ALL_DISORDERS_CALB1_CORR_DN	0.0153475	0.0786041	0.38073	1.64674	19
KIM_ALL_DISORDERS_CALB1_CORR_UP	1.18896e-20	6.43736e-19	1.17789	-2.19802	493
KIM_ALL_DISORDERS_DURATION_CORR_DN	0.051458	0.180096	0.321776	-1.25385	130
KIM_BIPOLAR_DISORDER_OLIGODENDROCYTE_DENSITY_CORR_DN	0.0088249	0.05226	0.38073	1.74812	33
LEE_AGING_CEREBELLUM_UP	0.000699456	0.00688555	0.477271	1.91467	66
LEE_AGING_NEOCORTEX_UP	0.021424	0.100866	0.352488	1.6335	66
LEE_CALORIE_RESTRICTION_NEOCORTEX_UP	0.0408432	0.159254	0.257206	1.52594	55
LEIN_ASTROCYTE_MARKERS	0.028298	0.126176	0.352488	1.58814	36
LEIN_NEURON_MARKERS	1.57807e-06	2.54506e-05	0.643552	-2.18272	62
LU_AGING_BRAIN_DN	5.46466e-05	0.000690369	0.557332	-1.78678	135
LU_AGING_BRAIN_UP	0.00797809	0.0487693	0.38073	1.49977	232
MANNO_MIDBRAIN_NEUROTYPES_HDA	1.11293e-07	2.34333e-06	0.704976	-1.67521	414
MANNO_MIDBRAIN_NEUROTYPES_HDA1	9.96613e-07	1.67874e-05	0.643552	-1.54323	499
MANNO_MIDBRAIN_NEUROTYPES_HDA2	4.37825e-07	8.50952e-06	0.674963	-1.6786	429
MANNO_MIDBRAIN_NEUROTYPES_HMGL	1e-50	1.08286e-48		2.40211	467
MANNO_MIDBRAIN_NEUROTYPES_HNBM	0.00546593	0.035717	0.407018	-1.38578	224
MANNO_MIDBRAIN_NEUROTYPES_HNBML1	4.94994e-06	7.07935e-05	0.610527	-1.67891	269
MANNO_MIDBRAIN_NEUROTYPES_HNBML5	2.42488e-06	3.67611e-05	0.627257	-1.61215	386
MANNO_MIDBRAIN_NEUROTYPES_HNPROG	0.00195367	0.0160966	0.431708	-1.51204	159
MANNO_MIDBRAIN_NEUROTYPES_HOMTN	7.82436e-09	1.91318e-07	0.74774	-1.845	319
MANNO_MIDBRAIN_NEUROTYPES_HOPC	0.0026294	0.0199309	0.431708	-1.37241	302
MANNO_MIDBRAIN_NEUROTYPES_HRGL2B	0.0212224	0.100541	0.352488	-1.1899	346
MANNO_MIDBRAIN_NEUROTYPES_HRN	0.000114991	0.0014289	0.538434	-1.55943	280
MANNO_MIDBRAIN_NEUROTYPES_HSERT	4.96593e-07	9.41043e-06	0.659444	-1.64245	377
MEISSNER_BRAIN_HCP_WITH_H3K27ME3	0.0314389	0.136731	0.282013	1.52349	86
MODY_HIPPOCAMPUS_POSTNATAL	0.0515579	0.180096	0.321776	-1.46888	53
MUELLER_METHYLATED_IN_GLIOBLASTOMA	0.00721331	0.0451875	0.407018	1.65178	17
Meckes_2018_WKYvsF344_Downregulated_HC	0.00251055	0.0192222	0.431708	1.47948	385
Microglia_All_Darmanis_PNAS_2015	4.88252e-06	7.07935e-05	0.610527	1.9853	18
Microglia_All_Zeisel_Science_2015	1e-50	1.08286e-48		2.55889	313
Microglia_All_Zhang_JNeuro_2014	1.84528e-07	3.68085e-06	0.690132	2.07662	24
NUTT_GBM_VS_AO_GLIOMA_UP	0.0341997	0.144019	0.287857	1.57003	43
Neuron_All_Cahoy_JNeuro_2008	0.0394609	0.156604	0.321776	-1.51957	63
Neuron_All_Darmanis_PNAS_2015	0.0336131	0.143139	0.321776	-1.59251	18
Neuron_All_Zhang_JNeuro_2014	0.0526665	0.183125	0.321776	-1.50716	27
Neuron_CorticoStriatal_Doyle_Cell_2008	0.0122297	0.0666916	0.38073	1.74115	11
Neuron_GABA_Sugino_NatNeuro_2006	0.0230002	0.103989	0.352488	-1.59071	25
Neuron_Interneuron_Zeisel_Science_2015	0.000123131	0.00150538	0.518848	-1.53712	279
Neuron_Neuron_CCK_Doyle_Cell_2008	0.0123832	0.0670462	0.38073	1.64031	8
Neuron_Pyramidal_Cortical_Zeisel_Science_2015	5.7059e-15	2.16254e-13	0.996986	-2.43223	201
Oligodendrocyte_All_Cahoy_JNeuro_2008	0.0178793	0.0903415	0.352488	-1.54841	36
POMEROY_MEDULLOBLASTOMA_DESMOPLASIC_VS_CLASSIC_DN	0.056	0.191207	0.21925	1.46582	52
Park_2011_Coexpression_Hippocampus_Mouse_black	0.00326008	0.0235347	0.431708	-1.32976	333
Park_2011_Coexpression_Hippocampus_Mouse_cyan	0.0188919	0.0917951	0.352488	-1.30462	149
Park_2011_Coexpression_Hippocampus_Mouse_darkgrey	0.00933034	0.0539878	0.38073	-1.24231	326
Park_2011_Coexpression_Hippocampus_Mouse_greenyellow	0.00310527	0.0226327	0.431708	-1.35597	280
Park_2011_Coexpression_Hippocampus_Mouse_magenta	0.00148481	0.0132076	0.45506	-1.3629	305
Park_2011_Coexpression_Hippocampus_Mouse_violet	0.0604718	0.198431	0.321776	-1.39774	43
Park_2011_Coexpression_Hippocampus_Mouse_yellow	0.0293989	0.128812	0.352488	1.30442	470
RHEIN_ALL_GLUCOCORTICOID_THERAPY_UP	0.000312392	0.00333511	0.498493	1.96687	54
ROVERSI_GLIOMA_COPY_NUMBER_UP	0.0348655	0.146011	0.321776	1.57048	71
Replicated_InternalizingBehavior_DifferentiallyExpressed_HC	5.05698e-05	0.000649693	0.557332	1.75211	265
SHARMA_PILOCYTIC_ASTROCYTOMA_LOCATION_UP	0.0413355	0.159254	0.282013	1.5484	21
STARK_PREFRONTAL_CORTEX_22Q11_DELETION_DN	3.40649e-11	9.22185e-10	0.851339	-1.88478	459
VERHAAK_GLIOBLASTOMA_MESENCHYMAL	2.72255e-17	1.21394e-15	1.07687	2.27956	178
VERHAAK_GLIOBLASTOMA_NEURAL	0.0495308	0.177935	0.321776	-1.25421	108
VERHAAK_GLIOBLASTOMA_PRONEURAL	0.000210992	0.00246049	0.518848	-1.70327	153
Wilhelm_2013_FlindersSensitiveLine_Downregulated_HC	0.000300314	0.00328753	0.498493	1.90887	93
ZHONG_PFC_C1_DLX5_POS_INTERNEURON	0.0180232	0.0903415	0.352488	-1.64601	6
ZHONG_PFC_C2_THY1_POS_OPC	0.00910274	0.0534874	0.38073	-1.72815	23
ZHONG_PFC_C3_MICROGLIA	6.95126e-07	1.22626e-05	0.659444	-1.62639	412
ZHONG_PFC_C3_PROX1_CCK_POS_INTERNEURON	0.0393526	0.156604	0.321776	-1.5909	9
ZHONG_PFC_MAJOR_TYPES_MICROGLIA	1.70263e-47	1.29059e-45	1.79734	2.448	364

## Sheet: hippocampus_hallmark
pathway	pval	padj	log2err	NES	size
Adipogenesis	0.0586466	0.12218	0.227987	1.33754	190
Allograft Rejection	1.14586e-17	5.72931e-16	1.08644	2.84875	124
Androgen Response	0.00239327	0.00797756	0.431708	1.74118	87
Angiogenesis	0.0879541	0.169143	0.208955	1.45322	31
Apical Junction	0.00440104	0.0129442	0.407018	1.56042	178
Apoptosis	0.100775	0.186621	0.173748	1.28893	143
Coagulation	2.73429e-07	1.95306e-06	0.674963	2.27695	93
Complement	2.99212e-13	4.98686e-12	0.932595	2.63841	148
Dna Repair	0.0018105	0.00646606	0.45506	-1.587	138
Epithelial Mesenchymal Transition	0.0185896	0.046474	0.352488	1.43709	179
Fatty Acid Metabolism	0.00146435	0.0056321	0.45506	-1.57345	132
G2m Checkpoint	0.041791	0.0908501	0.271289	1.37663	177
Heme Metabolism	0.0228005	0.0542868	0.352488	1.43972	167
Il2 Stat5 Signaling	6.73872e-07	4.2117e-06	0.659444	2.13465	165
Il6 Jak Stat3 Signaling	8.33173e-11	6.94311e-10	0.839089	2.64336	65
Inflammatory Response	3.1041e-12	3.88012e-11	0.898671	2.58021	152
Interferon Alpha Response	0.00341032	0.0106573	0.431708	1.68717	80
Interferon Gamma Response	3.93977e-11	3.93977e-10	0.851339	2.51279	152
Kras Signaling Up	2.18923e-06	1.21624e-05	0.627257	2.11366	174
Mitotic Spindle	0.000274733	0.00137367	0.498493	1.75671	190
Mtorc1 Signaling	0.0100181	0.0263634	0.38073	1.44346	190
Myc Targets V1	0.00636019	0.0176672	0.407018	-1.44295	183
Oxidative Phosphorylation	2.78488e-14	6.96219e-13	0.975995	-2.4194	184
Pi3k Akt Mtor Signaling	0.0371444	0.0844191	0.321776	1.45726	94
Tnfa Signaling Via Nfkb	0.000513253	0.00233297	0.477271	1.79156	171
Uv Response Dn	0.0769231	0.153846	0.199915	1.34622	140
Uv Response Up	0.00101152	0.00421465	0.45506	-1.62713	145

## Sheet: hippocampus_go
pathway	pval	padj	log2err	NES	size	GO_ID	GO_Domain
2fe 2s Cluster Assembly	0.0162555	0.117242	0.352488	-1.61379	10	GO:0044571	BP
4 Hydroxyproline Metabolic Process	0.0130048	0.099904	0.38073	-1.60111	8	GO:0019472	BP
Actin Filament Organization	3.02949e-05	0.000820634	0.57561	1.71673	411	GO:0007015	BP
Actin Polymerization Or Depolymerization	0.00281835	0.0312352	0.431708	1.6428	171	GO:0008154	BP
Activated T Cell Proliferation	6.25119e-06	0.000219739	0.610527	2.24953	35	GO:0050798	BP
Activation Of Gtpase Activity	0.0135888	0.102691	0.38073	1.67468	43	GO:0090630	BP
Activation Of Immune Response	8.15494e-24	7.0948e-21	1.26274	2.62937	408	GO:0002253	BP
Activation Of Innate Immune Response	1.0804e-10	1.03008e-08	0.839089	2.30754	255	GO:0002218	BP
Actomyosin Structure Organization	0.0310348	0.183676	0.352488	1.42764	194	GO:0031032	BP
Acute Inflammatory Response	9.29885e-12	1.01125e-09	0.875325	2.70489	63	GO:0002526	BP
Acute Inflammatory Response To Antigenic Stimulus	5.41311e-06	0.000193207	0.610527	2.33168	18	GO:0002438	BP
Acute Phase Response	4.80028e-05	0.00120614	0.557332	2.24322	24	GO:0006953	BP
Adaptive Immune Response	2.44573e-28	4.25556e-25	1.38026	2.89151	288	GO:0002250	BP
Adaptive Immune Response Based On Somatic Recombination Of Immune Receptors Built From Immunoglobulin Superfamily Domains	1.08465e-22	7.54915e-20	1.2295	2.82136	226	GO:0002460	BP
Adhesion Of Symbiont To Host	0.023124	0.150414	0.352488	1.62106	10	GO:0044406	BP
Aerobic Electron Transport Chain	7.43381e-09	5.07248e-07	0.761461	-2.41794	52	GO:0019646	BP
Aerobic Respiration	2.19152e-10	2.00697e-08	0.826657	-2.25915	160	GO:0009060	BP
Alcohol Biosynthetic Process	0.000990149	0.0135658	0.45506	1.8246	118	GO:0046165	BP
Alcohol Metabolic Process	0.0138213	0.103662	0.38073	1.46282	265	GO:0006066	BP
Aldehyde Catabolic Process	0.00915803	0.076795	0.38073	-1.78487	13	GO:0046185	BP
Alpha Beta T Cell Activation	2.8234e-06	0.000108568	0.627257	2.15575	142	GO:0046631	BP
Alpha Beta T Cell Differentiation	0.000217654	0.00412771	0.518848	1.98165	102	GO:0046632	BP
Alpha Beta T Cell Proliferation	0.0113302	0.0899183	0.38073	1.68153	38	GO:0046633	BP
Ameboidal Type Cell Migration	0.00123652	0.0161378	0.45506	1.61596	239	GO:0001667	BP
Amelogenesis	0.0237947	0.153628	0.352488	1.60421	23	GO:0097186	BP
Amino Acid Biosynthetic Process	0.0323618	0.1888	0.321776	-1.43986	61	GO:0008652	BP
Amino Acid Catabolic Process	0.0337528	0.193828	0.321776	-1.42745	80	GO:0009063	BP
Amino Sugar Catabolic Process	0.0264442	0.164773	0.352488	-1.5984	11	GO:0046348	BP
Amp Catabolic Process	0.0145335	0.107346	0.38073	1.67735	8	GO:0006196	BP
Amyloid Beta Clearance	0.000114816	0.00249025	0.538434	2.20035	31	GO:0097242	BP
Anatomical Structure Maturation	0.000169295	0.00348607	0.518848	1.79075	246	GO:0071695	BP
Angiogenesis	2.86448e-07	1.34708e-05	0.674963	1.86846	494	GO:0001525	BP
Antifungal Innate Immune Response	6.02851e-06	0.000212987	0.610527	2.1946	13	GO:0061760	BP
Antigen Processing And Presentation	3.53642e-06	0.000131623	0.627257	2.31958	72	GO:0019882	BP
Antigen Processing And Presentation Of Exogenous Antigen	2.64463e-05	0.000745208	0.57561	2.19361	21	GO:0019884	BP
Antigen Processing And Presentation Of Exogenous Peptide Antigen	2.85068e-05	0.00078422	0.57561	2.15577	16	GO:0002478	BP
Antigen Processing And Presentation Of Exogenous Peptide Antigen Via Mhc Class I	0.00356965	0.0375299	0.431708	1.82051	7	GO:0042590	BP
Antigen Processing And Presentation Of Exogenous Peptide Antigen Via Mhc Class Ii	0.000261693	0.00485703	0.498493	2.06096	11	GO:0019886	BP
Antigen Processing And Presentation Of Peptide Antigen	0.000105341	0.00233495	0.538434	2.23299	30	GO:0048002	BP
Antigen Processing And Presentation Of Peptide Antigen Via Mhc Class I	0.00156109	0.0192987	0.45506	1.95135	17	GO:0002474	BP
Antigen Processing And Presentation Of Peptide Or Polysaccharide Antigen Via Mhc Class Ii	0.000368576	0.00628748	0.498493	2.05212	17	GO:0002504	BP
Antigen Receptor Mediated Signaling Pathway	3.2896e-08	1.99092e-06	0.719513	2.36568	127	GO:0050851	BP
Antimicrobial Humoral Immune Response Mediated By Antimicrobial Peptide	0.00494034	0.0480234	0.407018	1.84265	31	GO:0061844	BP
Antimicrobial Humoral Response	0.00694474	0.0624488	0.407018	1.74158	42	GO:0019730	BP
Apoptotic Cell Clearance	1.93309e-05	0.000570097	0.57561	2.28648	31	GO:0043277	BP
Apoptotic Mitochondrial Changes	0.0130741	0.100215	0.38073	-1.45805	109	GO:0008637	BP
Apoptotic Process Involved In Heart Morphogenesis	0.0125958	0.0974073	0.38073	-1.6101	5	GO:0003278	BP
Arachidonate Metabolite Production Involved In Inflammatory Response	0.00201963	0.0237443	0.431708	1.79096	5	GO:0002538	BP
Arachidonate Secretion	0.0180954	0.127553	0.352488	1.63564	23	GO:0050482	BP
Astrocyte Activation	0.000570188	0.00877144	0.477271	2.12016	19	GO:0048143	BP
Astrocyte Development	0.00261099	0.0294053	0.431708	1.93732	36	GO:0014002	BP
Astrocyte Differentiation	0.0104483	0.0849385	0.38073	1.59287	89	GO:0048708	BP
Atp Biosynthetic Process	0.000443312	0.00725989	0.498493	-1.79438	88	GO:0006754	BP
Atp Export	0.0161437	0.116677	0.352488	1.63695	6	GO:1904669	BP
Atp Metabolic Process	0.00331105	0.0353449	0.431708	-1.46069	208	GO:0046034	BP
Atp Synthesis Coupled Electron Transport	9.72576e-09	6.50878e-07	0.74774	-2.37581	63	GO:0042773	BP
Atrioventricular Canal Development	0.0171201	0.122086	0.352488	1.71602	9	GO:0036302	BP
Autocrine Signaling	0.0254203	0.160157	0.352488	1.66733	7	GO:0035425	BP
B Cell Activation	3.33785e-12	4.00542e-10	0.898671	2.45735	215	GO:0042113	BP
B Cell Activation Involved In Immune Response	0.00057216	0.00877144	0.477271	1.9836	68	GO:0002312	BP
B Cell Apoptotic Process	0.0220011	0.144854	0.352488	1.73328	24	GO:0001783	BP
B Cell Chemotaxis	0.00910318	0.0765195	0.38073	1.75696	7	GO:0035754	BP
B Cell Differentiation	1.74689e-07	8.81039e-06	0.690132	2.3099	119	GO:0030183	BP
B Cell Homeostasis	0.00021565	0.00411212	0.518848	2.02163	38	GO:0001782	BP
B Cell Mediated Immunity	6.63757e-14	1.07436e-11	0.954542	2.75134	85	GO:0019724	BP
B Cell Proliferation	1.30919e-09	1.072e-07	0.788187	2.57935	69	GO:0042100	BP
B Cell Receptor Signaling Pathway	2.50198e-09	1.9136e-07	0.774939	2.56117	45	GO:0050853	BP
Binding Of Sperm To Zona Pellucida	0.0275592	0.169125	0.352488	-1.61855	24	GO:0007339	BP
Biological Process Involved In Symbiotic Interaction	0.00646488	0.0590493	0.407018	1.63804	115	GO:0044403	BP
Bone Remodeling	0.000502149	0.00790714	0.477271	1.94762	85	GO:0046849	BP
Bone Resorption	0.000135542	0.00285871	0.518848	2.12644	61	GO:0045453	BP
Cadmium Ion Transmembrane Transport	0.0220195	0.144854	0.352488	1.62068	5	GO:0070574	BP
Calcium Ion Homeostasis	0.013535	0.102395	0.38073	1.4392	284	GO:0055074	BP
Calcium Ion Transmembrane Import Into Cytosol	0.000826277	0.0117365	0.477271	1.78067	155	GO:0097553	BP
Calcium Ion Transmembrane Transport	5.95752e-05	0.00143974	0.557332	1.77288	278	GO:0070588	BP
Calcium Ion Transport	1.40193e-05	0.000431744	0.593325	1.79434	366	GO:0006816	BP
Calcium Mediated Signaling	0.000282377	0.00511893	0.498493	1.83349	181	GO:0019722	BP
Cannabinoid Signaling Pathway	0.0254551	0.160157	0.352488	1.6081	5	GO:0038171	BP
Canonical Inflammasome Complex Assembly	0.0060931	0.0563187	0.407018	1.80182	40	GO:0140632	BP
Canonical Nf Kappab Signal Transduction	3.1329e-08	1.93887e-06	0.719513	2.15078	242	GO:0007249	BP
Carbohydrate Transport	0.00481094	0.0471608	0.407018	1.67596	109	GO:0008643	BP
Cardiac Muscle Cell Proliferation	0.0343725	0.196414	0.321776	1.46114	58	GO:0060038	BP
Cd4 Positive Alpha Beta T Cell Activation	0.000158821	0.00328987	0.518848	2.05001	96	GO:0035710	BP
Cd4 Positive Alpha Beta T Cell Differentiation	0.000184338	0.00368676	0.518848	2.09255	74	GO:0043367	BP
Cd4 Positive Or Cd8 Positive Alpha Beta T Cell Lineage Commitment	0.018061	0.127547	0.352488	1.70492	20	GO:0043369	BP
Cd8 Positive Alpha Beta T Cell Activation	0.00159785	0.0197182	0.45506	1.92842	23	GO:0036037	BP
Cell Activation Involved In Immune Response	7.27652e-17	1.80873e-14	1.05746	2.6495	225	GO:0002263	BP
Cell Adhesion Mediated By Integrin	4.02962e-12	4.75358e-10	0.887075	2.72783	81	GO:0033627	BP
Cell Cell Adhesion Mediated By Integrin	4.70469e-05	0.00119071	0.557332	2.17579	17	GO:0033631	BP
Cell Cell Junction Disassembly	0.00835028	0.071223	0.38073	1.67893	6	GO:0150147	BP
Cell Cell Junction Organization	0.0236786	0.15302	0.352488	1.43928	184	GO:0045216	BP
Cell Cell Recognition	0.0119537	0.093271	0.38073	1.65403	45	GO:0009988	BP
Cell Chemotaxis	1.36799e-14	2.44133e-12	0.986546	2.52042	226	GO:0060326	BP
Cell Junction Assembly	0.0301451	0.18033	0.352488	1.30755	491	GO:0034329	BP
Cell Junction Disassembly	2.34896e-06	9.23658e-05	0.627257	2.39726	30	GO:0150146	BP
Cell Junction Maintenance	0.0132386	0.10089	0.38073	1.62872	63	GO:0034331	BP
Cell Killing	8.40595e-17	2.01743e-14	1.05746	2.86016	114	GO:0001906	BP
Cell Matrix Adhesion	0.0022239	0.025584	0.431708	1.64177	204	GO:0007160	BP
Cell Maturation	0.00022765	0.00429388	0.518848	1.84313	174	GO:0048469	BP
Cell Recognition	0.0270479	0.167188	0.352488	1.51299	114	GO:0008037	BP
Cell Substrate Adhesion	0.00180531	0.0216823	0.45506	1.60597	328	GO:0031589	BP
Cell Surface Pattern Recognition Receptor Signaling Pathway	0.00311908	0.0337599	0.431708	1.83691	66	GO:0002752	BP
Cell Surface Receptor Signaling Pathway Via Stat	1.96307e-05	0.000576496	0.57561	2.07047	120	GO:0097696	BP
Cellular Component Disassembly	0.000120111	0.00257221	0.538434	1.63664	387	GO:0022411	BP
Cellular Component Maintenance	0.0158599	0.114746	0.352488	1.63175	91	GO:0043954	BP
Cellular Defense Response	0.0028744	0.0316048	0.431708	1.82806	8	GO:0006968	BP
Cellular Detoxification Of Aldehyde	0.0036821	0.0382499	0.431708	-1.70987	8	GO:0110095	BP
Cellular Extravasation	3.73961e-07	1.72369e-05	0.674963	2.37893	54	GO:0045123	BP
Cellular Respiration	2.35555e-07	1.15455e-05	0.690132	-1.93526	203	GO:0045333	BP
Cellular Response To Abiotic Stimulus	0.0126415	0.0976522	0.38073	1.4042	299	GO:0071214	BP
Cellular Response To Biotic Stimulus	5.64271e-18	1.78515e-15	1.09593	2.73261	201	GO:0071216	BP
Cellular Response To Ethanol	0.00671032	0.0607128	0.407018	1.80528	16	GO:0071361	BP
Cellular Response To Ether	0.0209513	0.14089	0.352488	1.63124	10	GO:0071362	BP
Cellular Response To External Stimulus	0.000211437	0.00404286	0.518848	2.08305	74	GO:0071496	BP
Cellular Response To Fatty Acid	0.0058315	0.0545528	0.407018	1.7301	33	GO:0071398	BP
Cellular Response To Insulin Stimulus	0.0235193	0.152274	0.352488	1.39947	249	GO:0032869	BP
Cellular Response To Interleukin 1	0.0209087	0.140739	0.352488	1.5956	67	GO:0071347	BP
Cellular Response To Interleukin 2	0.0170223	0.121513	0.352488	1.64747	5	GO:0071352	BP
Cellular Response To Lipid	9.05244e-12	1.00008e-09	0.875325	2.12063	488	GO:0071396	BP
Cellular Response To Lipoprotein Particle Stimulus	0.00106705	0.0144081	0.45506	2.05357	32	GO:0071402	BP
Cellular Response To Nutrient Levels	0.00309084	0.0335082	0.431708	1.5392	236	GO:0031669	BP
Cellular Response To Parathyroid Hormone Stimulus	0.0167617	0.120022	0.352488	-1.66195	7	GO:0071374	BP
Cellular Response To Peptide Hormone Stimulus	0.0350877	0.199193	0.282013	1.32618	333	GO:0071375	BP
Cellular Response To Peptidoglycan	0.0324468	0.188821	0.321776	1.57005	6	GO:0071224	BP
Cellular Response To Type Ii Interferon	6.45719e-05	0.00154973	0.538434	2.1064	86	GO:0071346	BP
Cellular Response To Virus	0.000458631	0.00739306	0.498493	2.00142	42	GO:0098586	BP
Cerebral Cortex Regionalization	0.0174735	0.124225	0.352488	-1.56473	8	GO:0021796	BP
Chaperone Mediated Protein Complex Assembly	0.0219566	0.144714	0.352488	-1.62255	19	GO:0051131	BP
Chaperone Mediated Protein Folding Independent Of Cofactor	0.0253501	0.160106	0.352488	-1.63141	7	GO:0044183	BP
Chemokine Production	6.55988e-06	0.000228284	0.610527	2.24973	86	GO:0032602	BP
Choline Metabolic Process	0.0314615	0.185413	0.321776	-1.60543	7	GO:0019695	BP
Chromosomal 5 Methylcytosine Dna Demethylation Pathway	0.0199797	0.136065	0.352488	1.62122	6	GO:0141166	BP
Chronic Inflammatory Response	0.000891271	0.0124814	0.477271	1.95893	12	GO:0002544	BP
Circadian Sleep Wake Cycle Non Rem Sleep	0.0256071	0.160334	0.352488	1.59749	10	GO:0042748	BP
Collagen Activated Signaling Pathway	0.0235752	0.152494	0.352488	1.56153	62	GO:0038065	BP
Columnar Cuboidal Epithelial Cell Differentiation	0.0196979	0.134806	0.352488	1.53059	95	GO:0002065	BP
Complement Activation	1.4728e-10	1.38523e-08	0.826657	2.5524	29	GO:0006956	BP
Complement Activation Alternative Pathway	4.15116e-05	0.00107806	0.557332	1.91826	6	GO:0006957	BP
Complement Activation Classical Pathway	7.49812e-08	4.07632e-06	0.704976	2.32968	16	GO:0006958	BP
Complement Dependent Cytotoxicity	0.000438873	0.00720415	0.498493	1.84977	6	GO:0097278	BP
Complement Receptor Mediated Signaling Pathway	0.00130273	0.0168531	0.45506	1.80137	6	GO:0002430	BP
Connective Tissue Replacement Involved In Inflammatory Response Wound Healing	0.0308485	0.18304	0.352488	1.57891	6	GO:0002248	BP
Cortical Actin Cytoskeleton Organization	0.00101961	0.0139147	0.45506	2.02639	40	GO:0030866	BP
Cortical Cytoskeleton Organization	0.00107042	0.0144103	0.45506	1.94537	56	GO:0030865	BP
Cortisol Biosynthetic Process	0.0217471	0.143742	0.352488	1.68439	9	GO:0034651	BP
Cortisol Metabolic Process	0.0217471	0.143742	0.352488	1.68439	9	GO:0034650	BP
Cranial Nerve Formation	0.00253957	0.0286939	0.431708	1.76536	6	GO:0021603	BP
Cytokine Mediated Signaling Pathway	1.32823e-17	4.01934e-15	1.08644	2.46295	377	GO:0019221	BP
Cytokine Production Involved In Immune Response	5.7864e-09	3.98746e-07	0.761461	2.44047	114	GO:0002367	BP
Cytokine Production Involved In Inflammatory Response	0.00142596	0.0181107	0.45506	1.98115	53	GO:0002534	BP
Cytolysis	0.00136149	0.0174834	0.45506	1.79833	6	GO:0019835	BP
Cytoplasmic Pattern Recognition Receptor Signaling Pathway	1.62804e-07	8.27091e-06	0.690132	2.22783	160	GO:0002753	BP
Cytoplasmic Translation	0.00128401	0.016642	0.45506	-1.62113	132	GO:0002181	BP
Cytoplasmic Translational Initiation	0.00374674	0.0386903	0.431708	-1.73633	42	GO:0002183	BP
Defense Response To Bacterium	2.17602e-18	8.41393e-16	1.10534	2.83078	161	GO:0042742	BP
Defense Response To Fungus	6.7778e-06	0.000234694	0.610527	2.3603	30	GO:0050832	BP
Defense Response To Gram Negative Bacterium	2.46528e-07	1.19988e-05	0.674963	2.40706	42	GO:0050829	BP
Defense Response To Gram Positive Bacterium	4.25123e-10	3.74539e-08	0.814036	2.56852	56	GO:0050830	BP
Defense Response To Virus	7.55525e-08	4.07632e-06	0.704976	2.13064	233	GO:0051607	BP
Dendritic Cell Antigen Processing And Presentation	0.0036289	0.0379237	0.431708	1.89931	11	GO:0002468	BP
Dendritic Cell Chemotaxis	0.000900292	0.0125321	0.477271	1.99645	13	GO:0002407	BP
Dendritic Cell Cytokine Production	1.85897e-05	0.000552926	0.57561	2.17531	16	GO:0002371	BP
Dendritic Cell Differentiation	9.75919e-10	8.15268e-08	0.788187	2.51339	35	GO:0097028	BP
Dendritic Cell Migration	0.000207833	0.00399591	0.518848	2.19804	19	GO:0036336	BP
Dephosphorylation	0.00690947	0.0622121	0.407018	1.58916	164	GO:0016311	BP
Detection Of Biotic Stimulus	5.4622e-05	0.00133862	0.557332	2.16457	29	GO:0009595	BP
Detection Of Chemical Stimulus	0.00279749	0.0311529	0.431708	1.94344	41	GO:0009593	BP
Detection Of External Biotic Stimulus	4.64998e-05	0.00118116	0.557332	2.177	20	GO:0098581	BP
Detection Of Molecule Of Bacterial Origin	0.00060668	0.00915942	0.477271	2.01988	14	GO:0032490	BP
Detection Of Other Organism	0.000382116	0.00645587	0.498493	2.04252	11	GO:0098543	BP
Detection Of Stimulus	0.0142429	0.105909	0.38073	1.55613	150	GO:0051606	BP
Development Of Primary Sexual Characteristics	0.034938	0.19883	0.321776	1.38458	205	GO:0045137	BP
Developmental Maturation	0.00173061	0.021021	0.45506	1.61012	328	GO:0021700	BP
Digestion	0.0129493	0.0996984	0.38073	1.55638	88	GO:0007586	BP
Disruption Of Anatomical Structure In Another Organism	8.63173e-07	3.64102e-05	0.659444	2.32401	35	GO:0141060	BP
Dna Templated Transcription Elongation	0.027114	0.167299	0.352488	-1.37371	107	GO:0006354	BP
Electron Transport Chain	2.69465e-05	0.000753202	0.57561	-1.96309	89	GO:0022900	BP
Endocrine Pancreas Development	0.0249346	0.158962	0.352488	-1.54209	37	GO:0031018	BP
Endolysosomal Toll Like Receptor Signaling Pathway	2.73616e-05	0.000758713	0.57561	2.28796	43	GO:0140894	BP
Endoplasmic Reticulum To Golgi Vesicle Mediated Transport	0.0321137	0.188299	0.321776	-1.38764	111	GO:0006888	BP
Endosome Organization	0.0282795	0.1722	0.352488	-1.4148	71	GO:0007032	BP
Endothelial Cell Apoptotic Process	0.0150393	0.110183	0.38073	1.62349	48	GO:0072577	BP
Endothelial Cell Chemotaxis	0.00654973	0.0595897	0.407018	1.7788	29	GO:0035767	BP
Endothelial Cell Development	0.0137036	0.103334	0.38073	1.67653	70	GO:0001885	BP
Endothelial Cell Differentiation	0.0148402	0.109068	0.38073	1.55557	116	GO:0045446	BP
Endothelial Cell Migration	0.00451982	0.0446846	0.407018	1.60023	219	GO:0043542	BP
Endothelium Development	0.00830341	0.0709972	0.38073	1.53809	141	GO:0003158	BP
Energy Derivation By Oxidation Of Organic Compounds	6.23869e-07	2.69697e-05	0.659444	-1.80838	292	GO:0015980	BP
Enteroendocrine Cell Differentiation	0.00798718	0.069167	0.38073	-1.70551	30	GO:0035883	BP
Ephrin Receptor Signaling Pathway	0.0269854	0.167099	0.352488	1.53273	74	GO:0048013	BP
Epithelial Cell Apoptotic Process	0.00389027	0.0399945	0.431708	1.68354	88	GO:1904019	BP
Epithelial Cell Development	0.0196152	0.134372	0.352488	1.43804	216	GO:0002064	BP
Epithelial Structure Maintenance	0.00817154	0.070294	0.38073	1.80365	27	GO:0010669	BP
Epithelial Tube Morphogenesis	0.0351827	0.199569	0.282013	1.33258	335	GO:0060562	BP
Erbb Signaling Pathway	0.013249	0.10089	0.38073	1.51676	155	GO:0038127	BP
Erk1 And Erk2 Cascade	3.72546e-08	2.21617e-06	0.719513	2.11499	286	GO:0070371	BP
Erythrocyte Development	0.00515126	0.0493161	0.407018	1.83107	41	GO:0048821	BP
Erythrocyte Homeostasis	0.00062298	0.0093046	0.477271	1.81734	149	GO:0034101	BP
Establishment Of Endothelial Barrier	0.0110491	0.0886366	0.38073	1.67064	50	GO:0061028	BP
Establishment Of Lymphocyte Polarity	0.0139474	0.104269	0.38073	1.74803	12	GO:0001767	BP
Establishment Of Protein Localization To Mitochondrial Membrane	0.0043273	0.0430257	0.407018	-1.80228	24	GO:0090151	BP
Establishment Or Maintenance Of Cell Polarity	0.021198	0.141723	0.352488	1.44464	213	GO:0007163	BP
Exocytosis	7.61983e-05	0.00176193	0.538434	1.69426	337	GO:0006887	BP
Extrinsic Apoptotic Signaling Pathway	0.00154019	0.0191766	0.45506	1.66318	201	GO:0097191	BP
Extrinsic Apoptotic Signaling Pathway Via Death Domain Receptors	0.0240032	0.154532	0.352488	1.49425	72	GO:0008625	BP
Fatty Acid Metabolic Process	0.0220675	0.144896	0.352488	1.39325	323	GO:0006631	BP
Fatty Acid Transport	0.00264785	0.0297243	0.431708	1.72183	88	GO:0015908	BP
Fc Receptor Mediated Stimulatory Signaling Pathway	0.0115607	0.0911242	0.38073	1.77278	15	GO:0002431	BP
Fever Generation	0.000646988	0.00960136	0.477271	2.0183	11	GO:0001660	BP
Filopodium Assembly	0.00343993	0.0363306	0.431708	1.83167	66	GO:0046847	BP
Foam Cell Differentiation	0.000533884	0.00831283	0.477271	1.98153	26	GO:0090077	BP
Folic Acid Transport	0.0151174	0.110417	0.38073	1.73243	9	GO:0015884	BP
G Protein Coupled Purinergic Nucleotide Receptor Signaling Pathway	1.70086e-05	0.000514696	0.57561	1.98497	7	GO:0035589	BP
G Protein Coupled Purinergic Receptor Signaling Pathway	0.03099	0.183676	0.352488	1.68339	11	GO:0035588	BP
Gamma Delta T Cell Activation	0.0352517	0.199798	0.321776	1.61416	15	GO:0046629	BP
Gas Transport	0.0059815	0.055806	0.407018	-1.73768	9	GO:0015669	BP
Gdp Mannose Biosynthetic Process	0.0347839	0.198436	0.321776	-1.52433	5	GO:0009298	BP
Gdp Mannose Metabolic Process	0.00106667	0.0144081	0.45506	-1.8649	10	GO:0019673	BP
Generation Of Precursor Metabolites And Energy	4.19716e-06	0.000153749	0.610527	-1.61425	400	GO:0006091	BP
Germ Cell Migration	0.0113038	0.0898114	0.38073	1.7001	8	GO:0008354	BP
Germinal Center B Cell Differentiation	0.00835028	0.071223	0.38073	1.67968	6	GO:0002314	BP
Germinal Center Formation	7.1081e-05	0.00166015	0.538434	2.11378	13	GO:0002467	BP
Gland Development	0.00291868	0.0320411	0.431708	1.47086	404	GO:0048732	BP
Gland Morphogenesis	0.0249771	0.158962	0.352488	1.47216	132	GO:0022612	BP
Glial Cell Activation	4.60122e-07	2.07951e-05	0.674963	2.41733	50	GO:0061900	BP
Glial Cell Development	0.00501823	0.0483632	0.407018	1.58066	140	GO:0021782	BP
Glial Cell Migration	0.0320908	0.188299	0.321776	1.53364	70	GO:0008347	BP
Gliogenesis	0.0104587	0.0849385	0.38073	1.42843	369	GO:0042063	BP
Glycerolipid Biosynthetic Process	0.0041814	0.0421776	0.407018	1.59539	188	GO:0045017	BP
Glycerolipid Catabolic Process	0.0216503	0.143742	0.352488	1.58326	46	GO:0046503	BP
Glycerolipid Metabolic Process	2.6686e-05	0.00074893	0.57561	1.81167	318	GO:0046486	BP
Glycerophospholipid Metabolic Process	0.00744363	0.0656625	0.407018	1.54984	244	GO:0006650	BP
Granulocyte Activation	1.42739e-08	9.37232e-07	0.74774	2.44777	35	GO:0036230	BP
Granulocyte Chemotaxis	1.05206e-10	1.01699e-08	0.839089	2.62197	84	GO:0071621	BP
Granulocyte Differentiation	9.51635e-05	0.00212288	0.538434	2.13741	42	GO:0030851	BP
Granulocyte Macrophage Colony Stimulating Factor Production	0.000345063	0.00597422	0.498493	2.04616	11	GO:0032604	BP
Granulocyte Migration	1.99884e-12	2.44069e-10	0.898671	2.74343	106	GO:0097530	BP
Growth Hormone Receptor Signaling Pathway Via Jak Stat	0.0192794	0.132988	0.352488	1.70375	9	GO:0060397	BP
Heat Generation	0.00130843	0.0168955	0.45506	2.03561	19	GO:0031649	BP
Hematopoietic Or Lymphoid Organ Development	6.62311e-05	0.00157327	0.538434	2.10637	96	GO:0048534	BP
Hematopoietic Progenitor Cell Differentiation	0.00034629	0.00598059	0.498493	1.81954	146	GO:0002244	BP
Heme Metabolic Process	0.0295621	0.177526	0.352488	-1.59583	34	GO:0042168	BP
Hemostasis	0.000239366	0.00447846	0.518848	1.95729	148	GO:0007599	BP
Hepatocyte Apoptotic Process	0.000533884	0.00831283	0.477271	1.98144	26	GO:0097284	BP
Heterophilic Cell Cell Adhesion Via Plasma Membrane Cell Adhesion Molecules	0.00818801	0.070294	0.38073	1.76278	41	GO:0007157	BP
Heterotypic Cell Cell Adhesion	0.000740449	0.0106698	0.477271	1.97946	45	GO:0034113	BP
Histamine Production Involved In Inflammatory Response	0.0102697	0.0838937	0.38073	1.71329	10	GO:0002349	BP
Histamine Transport	0.0223671	0.146449	0.352488	1.63057	16	GO:0051608	BP
Homeostasis Of Number Of Cells	3.21786e-09	2.38258e-07	0.774939	2.0767	337	GO:0048872	BP
Homeostasis Of Number Of Cells Within A Tissue	0.0347164	0.198217	0.321776	1.58698	41	GO:0048873	BP
Homotypic Cell Cell Adhesion	0.010499	0.0851668	0.38073	1.72446	71	GO:0034109	BP
Humoral Immune Response	3.22677e-14	5.44387e-12	0.965328	2.77877	89	GO:0006959	BP
Humoral Immune Response Mediated By Circulating Immunoglobulin	7.36792e-10	6.41009e-08	0.801216	2.55218	24	GO:0002455	BP
Hyaluronan Biosynthetic Process	0.0118591	0.0927406	0.38073	1.76548	12	GO:0030213	BP
Hyaluronan Metabolic Process	0.0333798	0.192799	0.321776	1.56915	28	GO:0030212	BP
Hydrogen Peroxide Biosynthetic Process	0.000577114	0.00882794	0.477271	2.01724	13	GO:0050665	BP
Hydrogen Peroxide Metabolic Process	0.0116991	0.0919023	0.38073	1.69709	34	GO:0042743	BP
Hypersensitivity	3.84205e-05	0.00100529	0.557332	1.9714	7	GO:0002524	BP
I Kappab Phosphorylation	0.0113764	0.0899768	0.38073	1.81385	13	GO:0007252	BP
Icosanoid Biosynthetic Process	0.000727986	0.0105558	0.477271	1.94149	38	GO:0046456	BP
Icosanoid Metabolic Process	0.000612565	0.00920613	0.477271	2.03821	71	GO:0006690	BP
Icosanoid Secretion	0.000895061	0.0124842	0.477271	1.9399	35	GO:0032309	BP
Icosanoid Transport	0.00780487	0.0681684	0.407018	1.82627	47	GO:0071715	BP
Immature B Cell Differentiation	0.00745897	0.0657145	0.407018	1.81975	15	GO:0002327	BP
Immune Effector Process	1.10709e-36	7.70534e-33	1.57637	2.88986	448	GO:0002252	BP
Immune Response Regulating Cell Surface Receptor Signaling Pathway	7.83819e-16	1.62739e-13	1.02767	2.60268	210	GO:0002768	BP
Immune Response Regulating Signaling Pathway	6.01277e-22	3.80445e-19	1.21254	2.59882	378	GO:0002764	BP
Immune System Development	2.22102e-06	8.78312e-05	0.627257	2.1246	166	GO:0002520	BP
Immunoglobulin Production	9.29771e-06	0.000306692	0.593325	2.20451	94	GO:0002377	BP
Immunoglobulin Production Involved In Immunoglobulin Mediated Immune Response	0.0214281	0.142718	0.352488	1.56618	50	GO:0002381	BP
Immunological Synapse Formation	0.000661417	0.0097946	0.477271	2.01182	14	GO:0001771	BP
Import Across Plasma Membrane	0.0244115	0.156305	0.352488	1.4861	176	GO:0098739	BP
Inclusion Body Assembly	0.022929	0.149285	0.352488	-1.56108	27	GO:0070841	BP
Inflammasome Mediated Signaling Pathway	0.00617252	0.0568264	0.407018	1.77628	44	GO:0141084	BP
Inflammatory Cell Apoptotic Process	0.00432556	0.0430257	0.407018	1.83348	21	GO:0006925	BP
Inflammatory Response To Antigenic Stimulus	2.61595e-05	0.000740122	0.57561	2.25395	44	GO:0002437	BP
Inflammatory Response To Wounding	5.51125e-05	0.00134591	0.557332	2.21554	23	GO:0090594	BP
Inhibition Of Non Skeletal Tissue Mineralization	0.0138896	0.103948	0.38073	1.74025	9	GO:0140928	BP
Innate Immune Response Activating Cell Surface Receptor Signaling Pathway	0.000943772	0.0130072	0.477271	1.94123	68	GO:0002220	BP
Inner Mitochondrial Membrane Organization	0.00153793	0.0191766	0.45506	-1.80741	39	GO:0007007	BP
Innervation	0.0247019	0.15773	0.352488	1.63532	30	GO:0060384	BP
Inorganic Ion Homeostasis	0.00216714	0.0250969	0.431708	1.51893	447	GO:0098771	BP
Inositol Phosphate Biosynthetic Process	0.000142489	0.00296922	0.518848	2.17256	24	GO:0032958	BP
Inositol Phosphate Metabolic Process	0.000935347	0.0129682	0.477271	1.98089	34	GO:0043647	BP
Inositol Trisphosphate Biosynthetic Process	0.00138938	0.0177433	0.45506	1.92245	9	GO:0032959	BP
Inositol Trisphosphate Metabolic Process	0.00323111	0.0346511	0.431708	1.89029	15	GO:0032957	BP
Integrin Activation	8.76505e-06	0.000293292	0.593325	2.29994	23	GO:0033622	BP
Integrin Mediated Signaling Pathway	1.96802e-09	1.52194e-07	0.774939	2.54465	95	GO:0007229	BP
Interferon Alpha Production	0.00217895	0.02515	0.431708	1.96256	32	GO:0032607	BP
Interferon Beta Production	0.00432183	0.0430257	0.407018	1.86177	62	GO:0032608	BP
Interferon Mediated Signaling Pathway	0.0138001	0.103662	0.38073	1.54797	64	GO:0140888	BP
Interleukin 1 Beta Production	7.36275e-06	0.000252437	0.610527	2.26218	78	GO:0032611	BP
Interleukin 1 Production	7.43274e-07	3.19333e-05	0.659444	2.24835	90	GO:0032612	BP
Interleukin 10 Mediated Signaling Pathway	0.0103341	0.0842214	0.38073	1.69562	5	GO:0140105	BP
Interleukin 10 Production	4.1523e-07	1.90132e-05	0.674963	2.32936	46	GO:0032613	BP
Interleukin 12 Production	1.21725e-05	0.000382432	0.593325	2.16824	46	GO:0032615	BP
Interleukin 13 Production	0.00414357	0.0418566	0.407018	1.83678	16	GO:0032616	BP
Interleukin 17 Production	0.0274142	0.168703	0.352488	1.53327	33	GO:0032620	BP
Interleukin 17a Mediated Signaling Pathway	0.0267044	0.166007	0.352488	1.60344	5	GO:0038173	BP
Interleukin 18 Production	2.98671e-05	0.000815197	0.57561	2.06714	10	GO:0032621	BP
Interleukin 2 Production	0.00012868	0.00273054	0.518848	2.08733	55	GO:0032623	BP
Interleukin 23 Production	0.00325058	0.0348062	0.431708	1.82388	7	GO:0032627	BP
Interleukin 3 Mediated Signaling Pathway	0.00316953	0.0341485	0.431708	1.75691	6	GO:0038156	BP
Interleukin 33 Mediated Signaling Pathway	0.00838182	0.0714045	0.38073	1.73744	8	GO:0038172	BP
Interleukin 4 Mediated Signaling Pathway	0.00135158	0.0173881	0.45506	1.92495	9	GO:0035771	BP
Interleukin 4 Production	0.0061491	0.0567609	0.407018	1.86675	24	GO:0032633	BP
Interleukin 5 Production	0.0018061	0.0216823	0.45506	1.9494	14	GO:0032634	BP
Interleukin 6 Mediated Signaling Pathway	0.00583029	0.0545528	0.407018	1.81623	16	GO:0070102	BP
Interleukin 6 Production	1.76741e-12	2.19664e-10	0.91012	2.62072	136	GO:0032635	BP
Interleukin 8 Production	2.24204e-05	0.000647493	0.57561	2.2559	59	GO:0032637	BP
Intestinal Epithelial Cell Development	0.00729592	0.0648691	0.407018	1.82374	14	GO:0060576	BP
Intestinal Epithelial Cell Differentiation	0.00535844	0.0506776	0.407018	1.85361	17	GO:0060575	BP
Intracellular Monoatomic Ion Homeostasis	0.015794	0.114388	0.352488	1.35886	448	GO:0006873	BP
Intracellular Receptor Signaling Pathway	4.28382e-05	0.00110838	0.557332	1.76752	330	GO:0030522	BP
Intracellular Triglyceride Homeostasis	0.0118781	0.0927852	0.38073	-1.6648	9	GO:0035356	BP
Jnk Cascade	0.00632655	0.0579378	0.407018	1.57223	179	GO:0007254	BP
Keratinocyte Differentiation	0.0114848	0.0906281	0.38073	1.62219	92	GO:0030216	BP
Keratinocyte Migration	0.0268108	0.166313	0.352488	1.61607	16	GO:0051546	BP
Killing Of Cells Of Another Organism	5.54578e-06	0.000196932	0.610527	2.34332	32	GO:0031640	BP
Lamellipodium Assembly	0.0172724	0.123046	0.352488	1.64308	67	GO:0030032	BP
Lamellipodium Organization	0.0262917	0.164117	0.352488	1.52944	84	GO:0097581	BP
Lens Induction In Camera Type Eye	0.022273	0.14597	0.352488	-1.59749	6	GO:0060235	BP
Leukocyte Activation Involved In Inflammatory Response	6.40723e-06	0.000224092	0.610527	2.35475	43	GO:0002269	BP
Leukocyte Adhesion To Vascular Endothelial Cell	2.23828e-07	1.11275e-05	0.690132	2.36593	38	GO:0061756	BP
Leukocyte Aggregation	0.00275487	0.0307767	0.431708	1.87368	16	GO:0070486	BP
Leukocyte Apoptotic Process	4.05868e-06	0.000149462	0.610527	2.18143	108	GO:0071887	BP
Leukocyte Cell Cell Adhesion	2.35329e-17	6.29749e-15	1.07687	2.55316	298	GO:0007159	BP
Leukocyte Chemotaxis	2.93057e-13	4.16261e-11	0.932595	2.61339	161	GO:0030595	BP
Leukocyte Degranulation	5.02711e-08	2.86793e-06	0.719513	2.50614	62	GO:0043299	BP
Leukocyte Homeostasis	1.77157e-06	7.08629e-05	0.643552	2.25475	105	GO:0001776	BP
Leukocyte Mediated Cytotoxicity	4.78014e-06	0.000172382	0.610527	2.31757	81	GO:0001909	BP
Leukocyte Mediated Immunity	4.18466e-31	9.70841e-28	1.4462	2.96971	273	GO:0002443	BP
Leukocyte Migration	4.67263e-25	4.64593e-22	1.29512	2.81408	284	GO:0050900	BP
Leukocyte Migration Involved In Inflammatory Response	0.00367423	0.0382252	0.431708	1.88239	15	GO:0002523	BP
Leukocyte Proliferation	1.83772e-17	5.32939e-15	1.07687	2.60217	271	GO:0070661	BP
Leukocyte Tethering Or Rolling	6.7696e-05	0.00159717	0.538434	2.21914	24	GO:0050901	BP
Leukotriene Metabolic Process	0.000379754	0.00644655	0.498493	2.01644	16	GO:0006691	BP
Lipid Export From Cell	0.0132386	0.10089	0.38073	1.69963	49	GO:0140353	BP
Lipid Import Into Cell	0.0307007	0.182474	0.352488	1.65936	22	GO:0140354	BP
Lipid Localization	0.000269965	0.00497078	0.498493	1.64032	352	GO:0010876	BP
Lipopolysaccharide Mediated Signaling Pathway	1.28518e-06	5.35622e-05	0.643552	2.3272	54	GO:0031663	BP
Long Chain Fatty Acid Transport	0.0092553	0.0774242	0.38073	1.63836	54	GO:0015909	BP
Lymph Node Development	0.00100814	0.0137852	0.45506	2.03323	25	GO:0048535	BP
Lymphocyte Activation Involved In Immune Response	6.90655e-08	3.81504e-06	0.704976	2.27042	153	GO:0002285	BP
Lymphocyte Aggregation	0.0015599	0.0192987	0.45506	1.80554	5	GO:0071593	BP
Lymphocyte Anergy	0.0298895	0.179182	0.352488	1.58264	6	GO:0002249	BP
Lymphocyte Apoptotic Process	0.0110109	0.0886175	0.38073	1.60917	78	GO:0070227	BP
Lymphocyte Chemotaxis	0.0114044	0.0900963	0.38073	1.76251	28	GO:0048247	BP
Lymphocyte Costimulation	0.000116999	0.00252662	0.538434	2.12111	20	GO:0031294	BP
Lymphocyte Differentiation	1.94283e-10	1.80295e-08	0.826657	2.16606	341	GO:0030098	BP
Lymphocyte Homeostasis	0.0027374	0.0306307	0.431708	1.82818	72	GO:0002260	BP
Lymphocyte Mediated Immunity	2.39904e-17	6.29749e-15	1.07687	2.69852	197	GO:0002449	BP
Lymphocyte Migration	1.19124e-07	6.1958e-06	0.704976	2.41601	76	GO:0072676	BP
Lymphocyte Migration Into Lymphoid Organs	0.00151821	0.0189871	0.45506	1.79251	6	GO:0097021	BP
Lysine Metabolic Process	0.0301845	0.18033	0.352488	-1.54192	5	GO:0006553	BP
Macromolecule Deacylation	0.0147677	0.108765	0.38073	-1.59942	55	GO:0098732	BP
Macromolecule Methylation	0.0208983	0.140739	0.352488	-1.37497	113	GO:0043414	BP
Macrophage Activation	1.65121e-08	1.07406e-06	0.733762	2.49206	91	GO:0042116	BP
Macrophage Activation Involved In Immune Response	0.000695897	0.0102398	0.477271	2.01257	17	GO:0002281	BP
Macrophage Apoptotic Process	0.0226725	0.147892	0.352488	1.68002	9	GO:0071888	BP
Macrophage Chemotaxis	0.0193988	0.133586	0.352488	1.66339	31	GO:0048246	BP
Macrophage Cytokine Production	0.000834186	0.0118247	0.477271	2.09227	47	GO:0010934	BP
Macrophage Differentiation	0.000585113	0.00891113	0.477271	2.0269	58	GO:0030225	BP
Macrophage Migration	0.00248538	0.0282189	0.431708	1.96304	49	GO:1905517	BP
Maintenance Of Gastrointestinal Epithelium	0.00204943	0.0239731	0.431708	1.92984	17	GO:0030277	BP
Maintenance Of Location	0.00430841	0.0430257	0.407018	1.56986	195	GO:0051235	BP
Maintenance Of Postsynaptic Specialization Structure	0.00430392	0.0430257	0.407018	1.92877	18	GO:0098880	BP
Maintenance Of Protein Location In Nucleus	0.0110479	0.0886366	0.38073	-1.71649	24	GO:0051457	BP
Maintenance Of Synapse Structure	0.019721	0.134831	0.352488	1.64875	41	GO:0099558	BP
Mammary Gland Development	0.00203299	0.0238208	0.431708	1.7006	123	GO:0030879	BP
Manganese Ion Transport	0.00521043	0.0497456	0.407018	1.88721	13	GO:0006828	BP
Marginal Zone B Cell Differentiation	0.0325495	0.189102	0.321776	1.6402	9	GO:0002315	BP
Mast Cell Activation	9.37351e-10	7.95605e-08	0.788187	2.59765	61	GO:0045576	BP
Mast Cell Activation Involved In Immune Response	8.20258e-06	0.000275797	0.593325	2.30648	44	GO:0002279	BP
Mast Cell Chemotaxis	0.0303794	0.181183	0.352488	1.68852	11	GO:0002551	BP
Mast Cell Cytokine Production	0.0251922	0.159543	0.352488	1.62402	8	GO:0032762	BP
Mast Cell Proliferation	0.0107143	0.0866106	0.38073	1.74561	7	GO:0070662	BP
Maturation Of 5 8s Rrna	0.033083	0.191403	0.321776	-1.49948	33	GO:0000462	BP
Mature B Cell Differentiation	4.53344e-06	0.000164337	0.610527	2.29138	33	GO:0002335	BP
Mature B Cell Differentiation Involved In Immune Response	2.12264e-05	0.000615565	0.57561	2.18071	26	GO:0002313	BP
Mechanosensory Behavior	0.028575	0.173544	0.352488	1.63765	14	GO:0007638	BP
Megakaryocyte Development	0.0105629	0.0855849	0.38073	1.70263	23	GO:0035855	BP
Membrane Invagination	5.22286e-08	2.95537e-06	0.719513	2.48136	57	GO:0010324	BP
Membrane Protein Proteolysis	0.0175466	0.124617	0.352488	1.56063	54	GO:0033619	BP
Membrane To Membrane Docking	0.0131312	0.100432	0.38073	1.67086	5	GO:0022614	BP
Mesodermal Cell Differentiation	0.02123	0.141723	0.352488	1.61629	23	GO:0048333	BP
Mesodermal Cell Fate Specification	0.00946362	0.0786939	0.38073	1.66847	6	GO:0007501	BP
Microglia Development	0.00645603	0.0590459	0.407018	1.73143	5	GO:0014005	BP
Microglia Differentiation	0.0119941	0.0934521	0.38073	1.82887	18	GO:0014004	BP
Microglial Cell Migration	0.0250965	0.15936	0.352488	1.67134	7	GO:1904124	BP
Mitochondrial Electron Transport Cytochrome C To Oxygen	0.0020698	0.0241708	0.431708	-1.85021	12	GO:0006123	BP
Mitochondrial Electron Transport Nadh To Ubiquinone	0.000494566	0.00782313	0.477271	-1.97401	24	GO:0006120	BP
Mitochondrial Electron Transport Succinate To Ubiquinone	0.0111725	0.0891753	0.38073	-1.62471	5	GO:0006121	BP
Mitochondrial Electron Transport Ubiquinol To Cytochrome C	0.0194817	0.133985	0.352488	-1.6211	12	GO:0006122	BP
Mitochondrial Fragmentation Involved In Apoptotic Process	0.0133926	0.101428	0.38073	-1.66757	12	GO:0043653	BP
Mitochondrial Gene Expression	5.56919e-07	2.46889e-05	0.659444	-1.95824	161	GO:0140053	BP
Mitochondrial Membrane Organization	0.00667771	0.0605168	0.407018	-1.56969	103	GO:0007006	BP
Mitochondrial Respiratory Chain Complex Assembly	3.62209e-08	2.17325e-06	0.719513	-2.19159	106	GO:0033108	BP
Mitochondrial Translation	8.03967e-10	6.90816e-08	0.801216	-2.32917	119	GO:0032543	BP
Mitochondrial Transmembrane Transport	0.0340854	0.194934	0.321776	-1.45145	86	GO:1990542	BP
Mitochondrial Transport	0.0184034	0.128344	0.352488	-1.38755	158	GO:0006839	BP
Mitochondrion Organization	1.74413e-05	0.000525503	0.57561	-1.56793	431	GO:0007005	BP
Mitotic Dna Replication	0.033444	0.19301	0.321776	1.62744	15	GO:1902969	BP
Monocarboxylic Acid Catabolic Process	0.0108394	0.0875196	0.38073	-1.47712	105	GO:0072329	BP
Monocarboxylic Acid Transport	0.00514377	0.0493122	0.407018	1.65563	125	GO:0015718	BP
Monocyte Chemotaxis	0.000313112	0.00551712	0.498493	2.05148	29	GO:0002548	BP
Mononuclear Cell Differentiation	4.12318e-16	9.2572e-14	1.0377	2.33426	420	GO:1903131	BP
Mononuclear Cell Migration	1.64356e-12	2.07985e-10	0.91012	2.57563	162	GO:0071674	BP
Monosaccharide Transmembrane Transport	0.00432282	0.0430257	0.407018	1.762	98	GO:0015749	BP
Morphogenesis Of A Branching Structure	0.0220934	0.144929	0.352488	1.44204	204	GO:0001763	BP
Morphogenesis Of An Epithelium	0.0210912	0.141557	0.352488	1.34856	481	GO:0002009	BP
Mrna Processing	0.00308923	0.0335082	0.431708	-1.33961	448	GO:0006397	BP
Multicellular Organismal Level Chemical Homeostasis	0.00489325	0.0476989	0.407018	1.77866	61	GO:0140962	BP
Multicellular Organismal Level Iron Ion Homeostasis	0.000841396	0.0118969	0.477271	1.95219	26	GO:0060586	BP
Multivesicular Body Sorting Pathway	0.00413364	0.041817	0.407018	-1.71451	36	GO:0071985	BP
Muscle Cell Differentiation	0.0136836	0.103295	0.38073	1.40616	391	GO:0042692	BP
Myd88 Dependent Toll Like Receptor Signaling Pathway	0.000415325	0.00691545	0.498493	2.04107	14	GO:0002755	BP
Myeloid Cell Activation Involved In Immune Response	3.86576e-13	5.38114e-11	0.932595	2.76103	77	GO:0002275	BP
Myeloid Cell Apoptotic Process	0.000716924	0.0104171	0.477271	2.00569	34	GO:0033028	BP
Myeloid Cell Development	1.41417e-05	0.000433595	0.593325	2.16698	85	GO:0061515	BP
Myeloid Cell Differentiation	3.26895e-09	2.39493e-07	0.774939	2.02891	398	GO:0030099	BP
Myeloid Cell Homeostasis	2.50136e-06	9.78061e-05	0.627257	2.05682	184	GO:0002262	BP
Myeloid Dendritic Cell Activation	0.000186403	0.00370675	0.518848	2.17313	22	GO:0001773	BP
Myeloid Dendritic Cell Differentiation	0.000182236	0.00365522	0.518848	2.06796	16	GO:0043011	BP
Myeloid Leukocyte Activation	1.82057e-23	1.40791e-20	1.25451	2.88411	199	GO:0002274	BP
Myeloid Leukocyte Cytokine Production	4.95153e-05	0.00123522	0.557332	2.18283	60	GO:0061082	BP
Myeloid Leukocyte Differentiation	2.54308e-05	0.000722442	0.57561	1.94015	219	GO:0002573	BP
Myeloid Leukocyte Mediated Immunity	9.52205e-13	1.22729e-10	0.91012	2.75877	79	GO:0002444	BP
Myeloid Leukocyte Migration	1.34235e-15	2.66936e-13	1.01754	2.70972	172	GO:0097529	BP
Myoblast Fusion	0.015152	0.110427	0.38073	1.64671	35	GO:0007520	BP
N Acylethanolamine Metabolic Process	0.00715188	0.0640631	0.407018	1.72758	5	GO:0070291	BP
N Acylphosphatidylethanolamine Metabolic Process	0.00795305	0.0691051	0.38073	1.68542	6	GO:0070292	BP
Nadh Dehydrogenase Complex Assembly	1.36798e-06	5.66735e-05	0.643552	-2.19102	53	GO:0010257	BP
Nadp Catabolic Process	0.000738028	0.010657	0.477271	1.82536	5	GO:0006742	BP
Natural Killer Cell Activation	0.0246734	0.157692	0.352488	1.51003	58	GO:0030101	BP
Natural Killer Cell Mediated Immunity	0.0106429	0.0861336	0.38073	1.76148	47	GO:0002228	BP
Necroptotic Process	0.024108	0.154532	0.352488	1.54514	33	GO:0070266	BP
Negative Regulation Of Acute Inflammatory Response	0.0138216	0.103662	0.38073	1.67744	10	GO:0002674	BP
Negative Regulation Of Adaptive Immune Response	3.09287e-06	0.000117228	0.627257	2.34902	39	GO:0002820	BP
Negative Regulation Of Adipose Tissue Development	0.0304524	0.181463	0.352488	1.58576	5	GO:1904178	BP
Negative Regulation Of Alpha Beta T Cell Activation	0.0147404	0.10868	0.38073	1.68573	37	GO:0046636	BP
Negative Regulation Of Alpha Beta T Cell Differentiation	0.02123	0.141723	0.352488	1.61764	23	GO:0046639	BP
Negative Regulation Of Anoikis	0.0103674	0.0843941	0.38073	1.78563	15	GO:2000811	BP
Negative Regulation Of Antigen Receptor Mediated Signaling Pathway	0.00817154	0.070294	0.38073	1.80868	27	GO:0050858	BP
Negative Regulation Of B Cell Activation	0.000355288	0.00610569	0.498493	2.10626	24	GO:0050869	BP
Negative Regulation Of B Cell Mediated Immunity	0.0189439	0.131455	0.352488	1.69523	7	GO:0002713	BP
Negative Regulation Of B Cell Proliferation	0.000424403	0.00701625	0.498493	2.03841	14	GO:0030889	BP
Negative Regulation Of B Cell Receptor Signaling Pathway	0.00348451	0.0367458	0.431708	1.7526	6	GO:0050859	BP
Negative Regulation Of Binding	0.0151347	0.110417	0.38073	-1.45782	106	GO:0051100	BP
Negative Regulation Of Bone Remodeling	0.0292318	0.176456	0.352488	1.65293	15	GO:0046851	BP
Negative Regulation Of Catabolic Process	0.00497064	0.0482505	0.407018	1.49131	315	GO:0009895	BP
Negative Regulation Of Cd4 Positive Alpha Beta T Cell Differentiation	0.028125	0.17171	0.352488	1.65688	19	GO:0043371	BP
Negative Regulation Of Cell Activation	2.92542e-08	1.83432e-06	0.733762	2.30159	162	GO:0050866	BP
Negative Regulation Of Cell Adhesion	1.36011e-05	0.000420727	0.593325	1.91998	248	GO:0007162	BP
Negative Regulation Of Cell Adhesion Mediated By Integrin	0.00564749	0.0531888	0.407018	1.76467	10	GO:0033629	BP
Negative Regulation Of Cell Cell Adhesion	8.58582e-05	0.00192146	0.538434	1.92294	157	GO:0022408	BP
Negative Regulation Of Cell Cell Adhesion Mediated By Cadherin	0.0217471	0.143742	0.352488	1.68619	9	GO:2000048	BP
Negative Regulation Of Cell Development	0.0314321	0.185413	0.321776	1.36304	249	GO:0010721	BP
Negative Regulation Of Cell Killing	0.000457023	0.00739306	0.498493	2.10193	22	GO:0031342	BP
Negative Regulation Of Cellular Response To Growth Factor Stimulus	0.0167209	0.119853	0.352488	1.52565	88	GO:0090288	BP
Negative Regulation Of Chemokine C C Motif Ligand 5 Production	0.0348404	0.198436	0.321776	1.56865	5	GO:0071650	BP
Negative Regulation Of Chemotaxis	0.00328074	0.0350752	0.431708	1.83138	38	GO:0050922	BP
Negative Regulation Of Cytokine Production	1.4358e-09	1.15932e-07	0.788187	2.22601	231	GO:0001818	BP
Negative Regulation Of Defense Response	1.84664e-05	0.000551614	0.57561	1.97577	199	GO:0031348	BP
Negative Regulation Of Endocytosis	0.00169971	0.020718	0.45506	1.79573	64	GO:0045806	BP
Negative Regulation Of Endothelial Cell Apoptotic Process	0.0109424	0.0882492	0.38073	1.75003	26	GO:2000352	BP
Negative Regulation Of Endothelial Cell Differentiation	0.0145441	0.107346	0.38073	1.73909	12	GO:0045602	BP
Negative Regulation Of Epithelial Cell Differentiation	0.0150379	0.110183	0.38073	1.67827	49	GO:0030857	BP
Negative Regulation Of Erk1 And Erk2 Cascade	0.0212468	0.141723	0.352488	1.60234	70	GO:0070373	BP
Negative Regulation Of Exocytosis	0.00534493	0.0506776	0.407018	1.86349	32	GO:0045920	BP
Negative Regulation Of Fibroblast Apoptotic Process	0.000560764	0.00867316	0.477271	1.93275	8	GO:2000270	BP
Negative Regulation Of Granulocyte Differentiation	0.0128951	0.0993904	0.38073	1.68387	10	GO:0030853	BP
Negative Regulation Of Hemopoiesis	0.00154577	0.0192117	0.45506	1.75387	90	GO:1903707	BP
Negative Regulation Of Hormone Biosynthetic Process	0.0282249	0.172018	0.352488	1.66189	9	GO:0032353	BP
Negative Regulation Of Hormone Metabolic Process	0.0181579	0.127553	0.352488	1.64725	10	GO:0032351	BP
Negative Regulation Of Humoral Immune Response	0.0177371	0.125713	0.352488	1.71058	9	GO:0002921	BP
Negative Regulation Of Immune Effector Process	4.22375e-08	2.47036e-06	0.719513	2.37976	92	GO:0002698	BP
Negative Regulation Of Immune Response	1.58811e-06	6.38916e-05	0.643552	2.17571	140	GO:0050777	BP
Negative Regulation Of Immune System Process	8.28549e-14	1.31061e-11	0.954542	2.25099	401	GO:0002683	BP
Negative Regulation Of Inflammatory Response	3.55563e-05	0.000940957	0.557332	2.10107	121	GO:0050728	BP
Negative Regulation Of Innate Immune Response	0.00263012	0.0295729	0.431708	1.82303	74	GO:0045824	BP
Negative Regulation Of Interleukin 1 Beta Production	0.00144246	0.0182205	0.45506	1.92804	21	GO:0032691	BP
Negative Regulation Of Interleukin 1 Production	0.00393327	0.0403175	0.407018	1.86394	25	GO:0032692	BP
Negative Regulation Of Interleukin 10 Production	0.0143949	0.106697	0.38073	1.74112	12	GO:0032693	BP
Negative Regulation Of Interleukin 17 Production	0.0168082	0.120108	0.352488	1.77815	13	GO:0032700	BP
Negative Regulation Of Interleukin 2 Production	0.021057	0.141464	0.352488	1.67237	17	GO:0032703	BP
Negative Regulation Of Interleukin 6 Production	3.35539e-05	0.000894769	0.557332	2.28345	36	GO:0032715	BP
Negative Regulation Of Leukocyte Apoptotic Process	0.000109622	0.00239927	0.538434	2.22663	49	GO:2000107	BP
Negative Regulation Of Leukocyte Cell Cell Adhesion	0.000284157	0.00512365	0.498493	1.995	106	GO:1903038	BP
Negative Regulation Of Leukocyte Degranulation	0.00340328	0.036053	0.431708	1.90398	11	GO:0043301	BP
Negative Regulation Of Leukocyte Mediated Immunity	1.51579e-06	6.13368e-05	0.643552	2.44001	49	GO:0002704	BP
Negative Regulation Of Leukocyte Migration	0.00191252	0.0227153	0.45506	1.9634	36	GO:0002686	BP
Negative Regulation Of Leukocyte Proliferation	3.03022e-05	0.000820634	0.57561	2.22159	70	GO:0070664	BP
Negative Regulation Of Lipid Catabolic Process	0.00302448	0.0330837	0.431708	1.93237	24	GO:0050995	BP
Negative Regulation Of Lipid Metabolic Process	0.0047473	0.0466025	0.407018	1.66684	83	GO:0045833	BP
Negative Regulation Of Lipoprotein Particle Clearance	0.0325444	0.189102	0.321776	1.63535	7	GO:0010985	BP
Negative Regulation Of Locomotion	0.000861899	0.0120962	0.477271	1.64054	304	GO:0040013	BP
Negative Regulation Of Lymphocyte Activation	2.33863e-07	1.15439e-05	0.690132	2.28906	120	GO:0051250	BP
Negative Regulation Of Lymphocyte Mediated Immunity	1.11712e-05	0.000357555	0.593325	2.19661	38	GO:0002707	BP
Negative Regulation Of Macrophage Apoptotic Process	0.0185839	0.129344	0.352488	1.63863	5	GO:2000110	BP
Negative Regulation Of Macrophage Derived Foam Cell Differentiation	0.0145335	0.107346	0.38073	1.67649	8	GO:0010745	BP
Negative Regulation Of Map Kinase Activity	0.0219476	0.144714	0.352488	1.57787	45	GO:0043407	BP
Negative Regulation Of Mapk Cascade	0.00547702	0.0516532	0.407018	1.60104	153	GO:0043409	BP
Negative Regulation Of Mast Cell Activation	0.000587823	0.00892689	0.477271	1.96716	9	GO:0033004	BP
Negative Regulation Of Mast Cell Degranulation	0.00940169	0.0784601	0.38073	1.70522	5	GO:0043305	BP
Negative Regulation Of Mrna Catabolic Process	0.0203187	0.137834	0.352488	1.60544	65	GO:1902373	BP
Negative Regulation Of Myeloid Cell Apoptotic Process	0.000465186	0.00746012	0.498493	2.00486	16	GO:0033033	BP
Negative Regulation Of Myeloid Cell Differentiation	0.0180692	0.127547	0.352488	1.62541	71	GO:0045638	BP
Negative Regulation Of Myeloid Leukocyte Mediated Immunity	0.000325223	0.00567306	0.498493	1.99662	9	GO:0002887	BP
Negative Regulation Of Neutrophil Activation	1.21983e-05	0.000382432	0.593325	1.93523	6	GO:1902564	BP
Negative Regulation Of Nf Kappab Transcription Factor Activity	0.00456555	0.0450088	0.407018	1.70951	64	GO:0032088	BP
Negative Regulation Of Norepinephrine Secretion	0.0081365	0.0702606	0.38073	1.76315	7	GO:0010700	BP
Negative Regulation Of Nuclear Transcribed Mrna Catabolic Process Nonsense Mediated Decay	0.00600674	0.0559385	0.407018	1.76324	8	GO:2000623	BP
Negative Regulation Of Oligodendrocyte Differentiation	0.0260383	0.162827	0.352488	-1.58392	16	GO:0048715	BP
Negative Regulation Of Peptidyl Tyrosine Phosphorylation	0.00526678	0.0502148	0.407018	1.77212	42	GO:0050732	BP
Negative Regulation Of Phagocytosis	0.0269807	0.167099	0.352488	1.66956	22	GO:0050765	BP
Negative Regulation Of Phosphorus Metabolic Process	0.00284297	0.0313087	0.431708	1.53811	316	GO:0010563	BP
Negative Regulation Of Phosphorylation	0.00663864	0.0602411	0.407018	1.4874	278	GO:0042326	BP
Negative Regulation Of Plasminogen Activation	0.0110541	0.0886366	0.38073	1.65753	6	GO:0010757	BP
Negative Regulation Of Protein Binding	0.0100472	0.0826578	0.38073	-1.61606	67	GO:0032091	BP
Negative Regulation Of Protein Maturation	0.0219405	0.144714	0.352488	1.6933	19	GO:1903318	BP
Negative Regulation Of Protein Modification Process	0.0187259	0.130202	0.352488	1.37389	350	GO:0031400	BP
Negative Regulation Of Protein Targeting To Membrane	0.0128804	0.0993877	0.38073	-1.60939	5	GO:0090315	BP
Negative Regulation Of Receptor Signaling Pathway Via Stat	0.00730709	0.0648691	0.407018	1.84966	28	GO:1904893	BP
Negative Regulation Of Regulated Secretory Pathway	0.00119621	0.0157494	0.45506	1.9558	23	GO:1903306	BP
Negative Regulation Of Response To Biotic Stimulus	0.00913591	0.076702	0.38073	1.67479	97	GO:0002832	BP
Negative Regulation Of Response To External Stimulus	1.11535e-05	0.000357555	0.593325	1.84991	303	GO:0032102	BP
Negative Regulation Of Secretion	0.00727447	0.0648275	0.407018	1.63133	175	GO:0051048	BP
Negative Regulation Of T Cell Mediated Cytotoxicity	0.000262965	0.00486765	0.498493	1.8516	5	GO:0001915	BP
Negative Regulation Of T Cell Mediated Immunity	0.00143476	0.0181893	0.45506	1.96205	17	GO:0002710	BP
Negative Regulation Of T Cell Proliferation	0.00302792	0.0330837	0.431708	1.89059	53	GO:0042130	BP
Negative Regulation Of T Cell Receptor Signaling Pathway	0.01813	0.127553	0.352488	1.7122	22	GO:0050860	BP
Negative Regulation Of T Helper 1 Type Immune Response	0.0185839	0.129344	0.352488	1.63602	5	GO:0002826	BP
Negative Regulation Of Transport	0.000637517	0.00948103	0.477271	1.60597	403	GO:0051051	BP
Negative Regulation Of Transporter Activity	0.00885821	0.074731	0.38073	1.71331	38	GO:0032410	BP
Negative Regulation Of Triglyceride Metabolic Process	0.0232356	0.150858	0.352488	1.68266	12	GO:0090209	BP
Negative Regulation Of Tumor Necrosis Factor Superfamily Cytokine Production	0.000366373	0.00626525	0.498493	2.08581	51	GO:1903556	BP
Negative Regulation Of Type I Interferon Production	0.0121095	0.0940652	0.38073	1.71758	40	GO:0032480	BP
Negative Regulation Of Type Ii Interferon Production	0.0191987	0.132694	0.352488	1.69629	20	GO:0032689	BP
Negative T Cell Selection	0.00146876	0.0184856	0.45506	1.96615	11	GO:0043383	BP
Nerve Development	0.0267229	0.166007	0.352488	1.48241	90	GO:0021675	BP
Neuroinflammatory Response	5.32777e-07	2.377e-05	0.659444	2.43901	74	GO:0150076	BP
Neuron Maturation	0.00189359	0.0225674	0.45506	1.89774	61	GO:0042551	BP
Neuron Remodeling	0.00010589	0.00233967	0.538434	2.22384	18	GO:0016322	BP
Neuropeptide Catabolic Process	0.0167099	0.119853	0.352488	1.65042	5	GO:0010813	BP
Neutral Lipid Biosynthetic Process	0.000135227	0.00285871	0.518848	2.01255	48	GO:0046460	BP
Neutral Lipid Catabolic Process	0.0192634	0.132988	0.352488	1.65418	25	GO:0046461	BP
Neutral Lipid Metabolic Process	0.000108717	0.00238698	0.538434	1.98567	110	GO:0006638	BP
Neutrophil Activation	2.77504e-07	1.3229e-05	0.674963	2.42061	31	GO:0042119	BP
Neutrophil Activation Involved In Immune Response	7.68098e-06	0.000262057	0.593325	2.19093	14	GO:0002283	BP
Neutrophil Apoptotic Process	0.0288418	0.174707	0.352488	1.65917	9	GO:0001781	BP
Neutrophil Chemotaxis	3.10711e-09	2.32532e-07	0.774939	2.57185	63	GO:0030593	BP
Neutrophil Clearance	0.0288907	0.174852	0.352488	1.59147	5	GO:0097350	BP
Neutrophil Degranulation	0.000192423	0.00378324	0.518848	2.07543	11	GO:0043312	BP
Neutrophil Differentiation	0.021137	0.141723	0.352488	1.69835	12	GO:0030223	BP
Neutrophil Homeostasis	0.000305023	0.00544348	0.498493	2.1266	25	GO:0001780	BP
Neutrophil Mediated Immunity	0.000179355	0.00361829	0.518848	2.16488	25	GO:0002446	BP
Neutrophil Migration	4.77365e-12	5.44665e-10	0.887075	2.6414	83	GO:1990266	BP
Non Canonical Nf Kappab Signal Transduction	5.30777e-08	2.9792e-06	0.719513	2.36553	108	GO:0038061	BP
Noradrenergic Neuron Differentiation	0.0215169	0.143035	0.352488	-1.5415	8	GO:0003357	BP
Norepinephrine Biosynthetic Process	0.0337318	0.193828	0.321776	1.56299	6	GO:0042421	BP
Nuclear Mrna Surveillance	0.029074	0.175656	0.352488	-1.58205	11	GO:0071028	BP
Nuclear Transcribed Mrna Catabolic Process Nonsense Mediated Decay	0.0273118	0.168221	0.352488	1.55462	43	GO:0000184	BP
Nucleoside Phosphate Biosynthetic Process	0.000336069	0.00583301	0.498493	-1.5367	276	GO:1901293	BP
Nucleoside Triphosphate Biosynthetic Process	0.000136798	0.0028678	0.518848	-1.81215	110	GO:0009142	BP
Nucleoside Triphosphate Metabolic Process	0.000464891	0.00746012	0.498493	-1.53706	250	GO:0009141	BP
Nucleotide Binding Oligomerization Domain Containing 1 Signaling Pathway	0.00501201	0.0483632	0.407018	1.77879	8	GO:0070427	BP
Nucleotide Biosynthetic Process	0.000713572	0.0103924	0.477271	-1.54438	198	GO:0009165	BP
Nucleotide Metabolic Process	0.00530236	0.0504848	0.407018	-1.31965	419	GO:0009117	BP
Nutrient Storage	4.92915e-05	0.00123406	0.557332	2.18988	81	GO:0170062	BP
One Carbon Compound Transport	0.00208503	0.0242673	0.431708	-1.82335	9	GO:0019755	BP
Opsonization	0.0123549	0.0957571	0.38073	1.75509	9	GO:0008228	BP
Organ Induction	0.0194046	0.133586	0.352488	1.6562	16	GO:0001759	BP
Organelle Fusion	0.0225467	0.147209	0.352488	-1.35029	168	GO:0048284	BP
Organic Acid Catabolic Process	0.000458396	0.00739306	0.498493	-1.58961	191	GO:0016054	BP
Organic Acid Transport	0.00250693	0.0283711	0.431708	1.566	295	GO:0015849	BP
Organic Anion Transport	0.00844275	0.0716604	0.38073	1.42162	354	GO:0015711	BP
Organic Cation Transport	0.0305505	0.181892	0.352488	1.46204	118	GO:0015695	BP
Osteoclast Differentiation	0.0182418	0.127553	0.352488	1.53134	100	GO:0030316	BP
Oviduct Development	0.000940561	0.0130072	0.477271	1.815	6	GO:0060066	BP
Oxidative Phosphorylation	2.89717e-11	2.96534e-09	0.863415	-2.39985	123	GO:0006119	BP
P38mapk Cascade	0.00930453	0.0777425	0.38073	1.74038	59	GO:0038066	BP
Pattern Specification Process	0.0310302	0.183676	0.352488	1.34119	369	GO:0007389	BP
Peptidyl Arginine Methylation	0.0301845	0.18033	0.352488	-1.54163	5	GO:0018216	BP
Peptidyl Arginine Modification	0.00510949	0.0490511	0.407018	-1.76381	7	GO:0018195	BP
Peptidyl Cysteine Modification	0.0321052	0.188299	0.321776	-1.50415	33	GO:0018198	BP
Peptidyl L Cysteine S Palmitoylation	0.0289994	0.175357	0.352488	-1.58141	15	GO:0018230	BP
Peptidyl Lysine Modification	0.0284091	0.172688	0.352488	-1.37408	124	GO:0018205	BP
Peptidyl Tyrosine Dephosphorylation	0.00365482	0.0380802	0.431708	1.86911	25	GO:0035335	BP
Peptidyl Tyrosine Modification	1.44024e-06	5.8965e-05	0.643552	2.05525	232	GO:0018212	BP
Ph Reduction	0.0117418	0.0920306	0.38073	-1.6139	5	GO:0045851	BP
Phagocytosis	2.12326e-18	8.41393e-16	1.10534	2.81096	175	GO:0006909	BP
Phagocytosis Engulfment	1.44915e-09	1.15932e-07	0.788187	2.59345	40	GO:0006911	BP
Phagocytosis Recognition	0.0168017	0.120108	0.352488	1.8022	18	GO:0006910	BP
Phosphatidylglycerol Biosynthetic Process	0.00426229	0.0428074	0.407018	-1.77693	9	GO:0006655	BP
Phosphatidylinositol 3 Kinase Protein Kinase B Signal Transduction	1.2185e-06	5.10888e-05	0.643552	1.96946	284	GO:0043491	BP
Phosphatidylinositol Mediated Signaling	0.00385197	0.0396593	0.431708	1.9046	22	GO:0048015	BP
Phosphatidylinositol Metabolic Process	0.00316517	0.0341485	0.431708	1.67707	137	GO:0046488	BP
Phosphatidylinositol Phosphate Biosynthetic Process	0.0110792	0.0887354	0.38073	1.70805	44	GO:0046854	BP
Phospholipase C Activating G Protein Coupled Receptor Signaling Pathway	0.000422501	0.00700145	0.498493	1.99258	104	GO:0007200	BP
Phospholipid Metabolic Process	0.0101974	0.083624	0.38073	1.4342	315	GO:0006644	BP
Pigment Metabolic Process	0.0111915	0.0892242	0.38073	-1.55996	58	GO:0042440	BP
Plasma Cell Differentiation	0.0267377	0.166007	0.352488	1.62087	8	GO:0002317	BP
Plasminogen Activation	0.0295975	0.177585	0.352488	1.62996	17	GO:0031639	BP
Platelet Activation	0.000105199	0.00233495	0.538434	2.06871	82	GO:0030168	BP
Platelet Aggregation	0.000713728	0.0103924	0.477271	1.89991	48	GO:0070527	BP
Platelet Degranulation	0.00282747	0.0312368	0.431708	1.77015	5	GO:0002576	BP
Platelet Derived Growth Factor Receptor Beta Signaling Pathway	0.0116266	0.0914361	0.38073	1.65187	58	GO:0035791	BP
Platelet Derived Growth Factor Receptor Signaling Pathway	0.0308088	0.18296	0.352488	1.48389	104	GO:0048008	BP
Platelet Morphogenesis	0.0016184	0.0199012	0.45506	1.97883	22	GO:0036344	BP
Podosome Assembly	4.45198e-05	0.00113918	0.557332	2.17142	21	GO:0071800	BP
Polyol Biosynthetic Process	0.00249493	0.0282813	0.431708	1.86856	52	GO:0046173	BP
Polyol Metabolic Process	0.00165965	0.0203008	0.45506	1.84959	87	GO:0019751	BP
Porphyrin Containing Compound Metabolic Process	0.0113588	0.0899398	0.38073	-1.58473	39	GO:0006778	BP
Positive Regulation Of Acute Inflammatory Response	3.68572e-09	2.67215e-07	0.774939	2.41904	17	GO:0002675	BP
Positive Regulation Of Acute Inflammatory Response To Antigenic Stimulus	0.000861825	0.0120962	0.477271	1.82271	5	GO:0002866	BP
Positive Regulation Of Adaptive Immune Response	3.05705e-09	2.31272e-07	0.774939	2.45718	90	GO:0002821	BP
Positive Regulation Of Adipose Tissue Development	0.0234344	0.151865	0.352488	1.61502	10	GO:1904179	BP
Positive Regulation Of Alcohol Biosynthetic Process	0.00632223	0.0579378	0.407018	1.85345	30	GO:1902932	BP
Positive Regulation Of Alpha Beta T Cell Activation	0.000410619	0.00688653	0.498493	2.03597	56	GO:0046635	BP
Positive Regulation Of Alpha Beta T Cell Differentiation	0.00434323	0.0431073	0.407018	1.86683	41	GO:0046638	BP
Positive Regulation Of Alpha Beta T Cell Proliferation	0.0131142	0.100413	0.38073	1.77043	19	GO:0046641	BP
Positive Regulation Of Animal Organ Morphogenesis	0.0173157	0.123229	0.352488	1.66014	29	GO:0110110	BP
Positive Regulation Of Apoptotic Cell Clearance	0.000362463	0.00621365	0.498493	1.84588	5	GO:2000427	BP
Positive Regulation Of B Cell Activation	8.25085e-05	0.00187666	0.538434	2.10357	73	GO:0050871	BP
Positive Regulation Of B Cell Mediated Immunity	0.00019487	0.00379914	0.518848	2.16534	31	GO:0002714	BP
Positive Regulation Of B Cell Proliferation	5.6147e-07	2.47167e-05	0.659444	2.40305	39	GO:0030890	BP
Positive Regulation Of Calcium Ion Transport	0.0322347	0.188391	0.321776	1.48822	106	GO:0051928	BP
Positive Regulation Of Calcium Mediated Signaling	0.00733974	0.0650759	0.407018	1.73546	51	GO:0050850	BP
Positive Regulation Of Canonical Nf Kappab Signal Transduction	4.34582e-05	0.00112025	0.557332	2.0655	148	GO:0043123	BP
Positive Regulation Of Carbohydrate Metabolic Process	0.0274994	0.169078	0.352488	1.51973	82	GO:0045913	BP
Positive Regulation Of Cd4 Positive Alpha Beta T Cell Activation	0.000200676	0.00388269	0.518848	2.09691	33	GO:2000516	BP
Positive Regulation Of Cd4 Positive Alpha Beta T Cell Differentiation	0.00024863	0.00462692	0.498493	2.03362	26	GO:0043372	BP
Positive Regulation Of Cd8 Positive Alpha Beta T Cell Activation	0.00606944	0.056284	0.407018	1.73347	5	GO:2001187	BP
Positive Regulation Of Cell Activation	5.35577e-13	7.30905e-11	0.921426	2.36379	291	GO:0050867	BP
Positive Regulation Of Cell Adhesion	2.27611e-13	3.44385e-11	0.932595	2.23735	406	GO:0045785	BP
Positive Regulation Of Cell Adhesion Mediated By Integrin	8.85245e-06	0.000294799	0.593325	2.31754	18	GO:0033630	BP
Positive Regulation Of Cell Cell Adhesion	4.41857e-12	5.12554e-10	0.887075	2.41272	238	GO:0022409	BP
Positive Regulation Of Cell Cycle G1 S Phase Transition	0.0231693	0.150568	0.352488	1.57698	57	GO:1902808	BP
Positive Regulation Of Cell Cycle Phase Transition	0.0252212	0.159581	0.352488	1.52936	105	GO:1901989	BP
Positive Regulation Of Cell Development	3.10351e-06	0.000117228	0.627257	1.78804	458	GO:0010720	BP
Positive Regulation Of Cell Killing	0.00144802	0.0182576	0.45506	1.99281	36	GO:0031343	BP
Positive Regulation Of Cellular Component Biogenesis	3.49861e-05	0.000929402	0.557332	1.67466	480	GO:0044089	BP
Positive Regulation Of Chemokine Production	1.53849e-05	0.000467592	0.57561	2.24221	57	GO:0032722	BP
Positive Regulation Of Chemotaxis	5.80779e-08	3.23378e-06	0.719513	2.3961	121	GO:0050921	BP
Positive Regulation Of Cytokine Production	4.54052e-19	1.97513e-16	1.12391	2.5322	370	GO:0001819	BP
Positive Regulation Of Cytokine Production Involved In Immune Response	9.27822e-06	0.000306692	0.593325	2.33046	65	GO:0002720	BP
Positive Regulation Of Cytokine Production Involved In Inflammatory Response	0.000709468	0.0103924	0.477271	2.05412	22	GO:1900017	BP
Positive Regulation Of Cytoskeleton Organization	0.0152163	0.11078	0.38073	1.49913	171	GO:0051495	BP
Positive Regulation Of Cytosolic Calcium Ion Concentration	0.000482679	0.00768773	0.498493	1.83196	130	GO:0007204	BP
Positive Regulation Of D Glucose Transmembrane Transport	0.000483797	0.00768773	0.498493	2.03081	44	GO:0010828	BP
Positive Regulation Of Defense Response	2.97992e-21	1.72835e-18	1.19534	2.55589	397	GO:0031349	BP
Positive Regulation Of Dendritic Cell Antigen Processing And Presentation	0.0182716	0.127553	0.352488	1.64368	5	GO:0002606	BP
Positive Regulation Of Dendritic Cell Cytokine Production	0.0300757	0.180143	0.352488	1.65269	9	GO:0002732	BP
Positive Regulation Of Dephosphorylation	0.00776011	0.0679376	0.407018	1.85369	13	GO:0035306	BP
Positive Regulation Of Developmental Growth	0.00737503	0.0653057	0.407018	1.547	188	GO:0048639	BP
Positive Regulation Of Dna Binding Transcription Factor Activity	0.0103195	0.0842016	0.38073	1.59488	175	GO:0051091	BP
Positive Regulation Of Endocytosis	5.5438e-09	3.85848e-07	0.761461	2.37558	161	GO:0045807	BP
Positive Regulation Of Endothelial Cell Chemotaxis	0.0164421	0.118342	0.352488	1.68454	16	GO:2001028	BP
Positive Regulation Of Endothelial Cell Migration	0.00340244	0.036053	0.431708	1.69996	108	GO:0010595	BP
Positive Regulation Of Epithelial Cell Migration	0.0255012	0.160157	0.352488	1.54505	48	GO:0010634	BP
Positive Regulation Of Erk1 And Erk2 Cascade	7.39832e-08	4.05451e-06	0.704976	2.25004	173	GO:0070374	BP
Positive Regulation Of Erythrocyte Differentiation	0.00620681	0.0570666	0.407018	1.78258	29	GO:0045648	BP
Positive Regulation Of Establishment Of Protein Localization To Telomere	0.0198223	0.135391	0.352488	-1.61806	9	GO:1904851	BP
Positive Regulation Of Fatty Acid Transport	0.0013508	0.0173881	0.45506	1.97444	20	GO:2000193	BP
Positive Regulation Of Fever Generation	0.000395229	0.00664443	0.498493	1.85381	6	GO:0031622	BP
Positive Regulation Of G Protein Coupled Receptor Signaling Pathway	0.000842699	0.0118969	0.477271	1.9892	34	GO:0045745	BP
Positive Regulation Of Gamma Delta T Cell Activation	0.0155204	0.112758	0.38073	1.65859	10	GO:0046645	BP
Positive Regulation Of Glial Cell Proliferation	0.0166079	0.119289	0.352488	1.6913	28	GO:0060252	BP
Positive Regulation Of Granulocyte Chemotaxis	2.28278e-05	0.000656536	0.57561	2.27294	24	GO:0071624	BP
Positive Regulation Of Granulocyte Differentiation	0.0015028	0.0188459	0.45506	1.9156	9	GO:0030854	BP
Positive Regulation Of Granulocyte Macrophage Colony Stimulating Factor Production	0.00192263	0.0227964	0.45506	1.85567	8	GO:0032725	BP
Positive Regulation Of Growth	0.00124191	0.0161564	0.45506	1.62351	267	GO:0045927	BP
Positive Regulation Of Gtpase Activity	0.000746758	0.0107164	0.477271	1.80115	134	GO:0043547	BP
Positive Regulation Of Heat Generation	0.000525237	0.00821495	0.477271	1.94804	10	GO:0031652	BP
Positive Regulation Of Hemopoiesis	4.42625e-05	0.00113678	0.557332	2.01693	163	GO:1903708	BP
Positive Regulation Of Humoral Immune Response	0.000174756	0.00355644	0.518848	1.93718	7	GO:0002922	BP
Positive Regulation Of Hydrolase Activity	0.00106819	0.0144081	0.45506	1.6745	191	GO:0051345	BP
Positive Regulation Of Icosanoid Secretion	0.00117097	0.0154942	0.45506	1.94127	16	GO:0032305	BP
Positive Regulation Of Immune Effector Process	1.28988e-14	2.36252e-12	0.986546	2.61267	184	GO:0002699	BP
Positive Regulation Of Immunoglobulin Production	0.00493576	0.0480234	0.407018	1.83494	40	GO:0002639	BP
Positive Regulation Of Inflammasome Mediated Signaling Pathway	0.00105984	0.0143791	0.45506	2.02452	25	GO:0141087	BP
Positive Regulation Of Inflammatory Response	2.44299e-17	6.29749e-15	1.07687	2.93965	106	GO:0050729	BP
Positive Regulation Of Inflammatory Response To Antigenic Stimulus	0.000518355	0.00812557	0.477271	1.90553	7	GO:0002863	BP
Positive Regulation Of Inositol Trisphosphate Biosynthetic Process	0.0182716	0.127553	0.352488	1.64279	5	GO:0032962	BP
Positive Regulation Of Integrin Activation	6.81883e-05	0.00160335	0.538434	2.04347	10	GO:0033625	BP
Positive Regulation Of Interferon Alpha Production	0.00365482	0.0380802	0.431708	1.87262	25	GO:0032727	BP
Positive Regulation Of Interferon Beta Production	0.00281111	0.0312352	0.431708	1.91758	43	GO:0032728	BP
Positive Regulation Of Interleukin 1 Beta Production	8.22771e-05	0.00187666	0.538434	2.05266	46	GO:0032731	BP
Positive Regulation Of Interleukin 1 Production	0.000862027	0.0120962	0.477271	2.03268	53	GO:0032732	BP
Positive Regulation Of Interleukin 10 Production	0.000192357	0.00378324	0.518848	2.09933	33	GO:0032733	BP
Positive Regulation Of Interleukin 12 Production	0.000222298	0.00420433	0.518848	2.15197	31	GO:0032735	BP
Positive Regulation Of Interleukin 13 Production	0.00649414	0.0591613	0.407018	1.81819	12	GO:0032736	BP
Positive Regulation Of Interleukin 18 Production	0.00195465	0.0230974	0.431708	1.84722	7	GO:0032741	BP
Positive Regulation Of Interleukin 2 Production	0.00880207	0.0743476	0.38073	1.78211	32	GO:0032743	BP
Positive Regulation Of Interleukin 4 Production	0.00282492	0.0312368	0.431708	1.90381	15	GO:0032753	BP
Positive Regulation Of Interleukin 5 Production	0.00532854	0.0505957	0.407018	1.87225	11	GO:0032754	BP
Positive Regulation Of Interleukin 6 Production	2.14395e-08	1.36898e-06	0.733762	2.47733	87	GO:0032755	BP
Positive Regulation Of Interleukin 8 Production	4.78016e-05	0.00120543	0.557332	2.19084	45	GO:0032757	BP
Positive Regulation Of Intracellular Estrogen Receptor Signaling Pathway	0.00853561	0.0723603	0.38073	1.73388	8	GO:0033148	BP
Positive Regulation Of Jnk Cascade	0.00178073	0.0215172	0.45506	1.7664	88	GO:0046330	BP
Positive Regulation Of Jun Kinase Activity	0.0035224	0.0370891	0.431708	1.80659	42	GO:0043507	BP
Positive Regulation Of Kinase Activity	0.000635943	0.00947787	0.477271	1.72302	244	GO:0033674	BP
Positive Regulation Of L Glutamate Import Across Plasma Membrane	0.0276414	0.169203	0.352488	1.59847	5	GO:0002038	BP
Positive Regulation Of Lamellipodium Organization	0.0102127	0.083624	0.38073	1.65379	33	GO:1902745	BP
Positive Regulation Of Leukocyte Adhesion To Vascular Endothelial Cell	2.52509e-05	0.000722442	0.57561	2.20872	20	GO:1904996	BP
Positive Regulation Of Leukocyte Cell Cell Adhesion	1.32414e-11	1.41785e-09	0.875325	2.405	195	GO:1903039	BP
Positive Regulation Of Leukocyte Chemotaxis	2.07376e-07	1.03837e-05	0.690132	2.47311	74	GO:0002690	BP
Positive Regulation Of Leukocyte Degranulation	0.00109352	0.0146645	0.45506	2.01732	22	GO:0043302	BP
Positive Regulation Of Leukocyte Mediated Immunity	7.84709e-08	4.20121e-06	0.704976	2.43253	93	GO:0002705	BP
Positive Regulation Of Leukocyte Migration	1.28581e-14	2.36252e-12	0.986546	2.74506	126	GO:0002687	BP
Positive Regulation Of Leukocyte Proliferation	2.97169e-11	2.99753e-09	0.851339	2.58108	125	GO:0070665	BP
Positive Regulation Of Leukocyte Tethering Or Rolling	0.000174533	0.00355644	0.518848	2.00324	10	GO:1903238	BP
Positive Regulation Of Lipid Catabolic Process	0.00335523	0.0357071	0.431708	1.92642	19	GO:0050996	BP
Positive Regulation Of Lipid Localization	2.76782e-07	1.3229e-05	0.674963	2.29825	92	GO:1905954	BP
Positive Regulation Of Lipid Storage	8.39441e-05	0.00189692	0.538434	2.23785	18	GO:0010884	BP
Positive Regulation Of Lipid Transport	0.0120038	0.0934521	0.38073	1.62235	76	GO:0032370	BP
Positive Regulation Of Lipopolysaccharide Mediated Signaling Pathway	0.00115076	0.015285	0.45506	1.89551	10	GO:0031666	BP
Positive Regulation Of Lymphocyte Activation	9.00896e-11	8.83132e-09	0.839089	2.31638	247	GO:0051251	BP
Positive Regulation Of Lymphocyte Chemotaxis	0.00671679	0.0607128	0.407018	1.812	12	GO:0140131	BP
Positive Regulation Of Lymphocyte Differentiation	0.00122091	0.0160028	0.45506	1.8036	109	GO:0045621	BP
Positive Regulation Of Lymphocyte Migration	0.000297007	0.00532775	0.498493	2.14765	36	GO:2000403	BP
Positive Regulation Of Macrophage Chemotaxis	0.00994941	0.0819502	0.38073	1.75612	16	GO:0010759	BP
Positive Regulation Of Macrophage Cytokine Production	0.00027413	0.00503416	0.498493	2.02392	26	GO:0060907	BP
Positive Regulation Of Macrophage Derived Foam Cell Differentiation	0.00843109	0.0716488	0.38073	1.8247	11	GO:0010744	BP
Positive Regulation Of Macrophage Migration	0.000709468	0.0103924	0.477271	2.05679	22	GO:1905523	BP
Positive Regulation Of Map Kinase Activity	4.94732e-06	0.000177491	0.610527	2.17134	88	GO:0043406	BP
Positive Regulation Of Mapk Cascade	1.15447e-13	1.78558e-11	0.943632	2.23808	436	GO:0043410	BP
Positive Regulation Of Mast Cell Degranulation	0.0178175	0.126154	0.352488	1.69572	17	GO:0043306	BP
Positive Regulation Of Membrane Invagination	3.1405e-05	0.000840687	0.557332	2.14075	13	GO:1905155	BP
Positive Regulation Of Microglial Cell Migration	0.0190207	0.131725	0.352488	1.62487	6	GO:1904141	BP
Positive Regulation Of Mitochondrial Translation	0.000974343	0.013402	0.477271	-1.86302	17	GO:0070131	BP
Positive Regulation Of Monoatomic Ion Transport	0.0162321	0.117194	0.352488	1.48082	199	GO:0043270	BP
Positive Regulation Of Monocyte Chemotactic Protein 1 Production	0.00322465	0.0346351	0.431708	1.90306	14	GO:0071639	BP
Positive Regulation Of Monocyte Chemotaxis	0.000597557	0.00904129	0.477271	2.02231	14	GO:0090026	BP
Positive Regulation Of Mononuclear Cell Migration	5.1722e-07	2.32248e-05	0.659444	2.3925	78	GO:0071677	BP
Positive Regulation Of Myeloid Cell Apoptotic Process	0.00965203	0.0799003	0.38073	1.7272	10	GO:0033034	BP
Positive Regulation Of Myeloid Cell Differentiation	8.25665e-05	0.00187666	0.538434	2.08772	93	GO:0045639	BP
Positive Regulation Of Myeloid Leukocyte Cytokine Production Involved In Immune Response	0.000267127	0.00493158	0.498493	2.02922	35	GO:0061081	BP
Positive Regulation Of Myeloid Leukocyte Differentiation	0.00177745	0.0215148	0.45506	1.90985	57	GO:0002763	BP
Positive Regulation Of Myeloid Leukocyte Mediated Immunity	3.31905e-07	1.54004e-05	0.674963	2.28464	15	GO:0002888	BP
Positive Regulation Of Nervous System Development	0.0241123	0.154532	0.352488	1.34835	341	GO:0051962	BP
Positive Regulation Of Neurogenesis	0.0255424	0.160157	0.352488	1.38176	284	GO:0050769	BP
Positive Regulation Of Neuroinflammatory Response	0.00821106	0.070294	0.38073	1.79104	9	GO:0150078	BP
Positive Regulation Of Neutrophil Apoptotic Process	0.0254551	0.160157	0.352488	1.60756	5	GO:0033031	BP
Positive Regulation Of Neutrophil Migration	1.26392e-07	6.51619e-06	0.690132	2.43684	34	GO:1902624	BP
Positive Regulation Of Nf Kappab Transcription Factor Activity	0.00057112	0.00877144	0.477271	1.91702	103	GO:0051092	BP
Positive Regulation Of Nitric Oxide Metabolic Process	0.000287896	0.00517766	0.498493	2.10428	39	GO:0046209	BP
Positive Regulation Of Non Canonical Nf Kappab Signal Transduction	7.60397e-05	0.00176193	0.538434	2.18744	59	GO:1901224	BP
Positive Regulation Of Opsonization	0.0182716	0.127553	0.352488	1.64203	5	GO:1903028	BP
Positive Regulation Of Organic Acid Transport	0.00720983	0.0643339	0.407018	1.7434	51	GO:0032892	BP
Positive Regulation Of Ossification	0.0246734	0.157692	0.352488	1.5084	58	GO:0045778	BP
Positive Regulation Of P38mapk Cascade	0.00591059	0.0552184	0.407018	1.87717	27	GO:1900745	BP
Positive Regulation Of Pattern Recognition Receptor Signaling Pathway	4.25297e-06	0.000154977	0.610527	2.325	70	GO:0062208	BP
Positive Regulation Of Peptidyl Tyrosine Phosphorylation	0.000201536	0.00388557	0.518848	1.95647	118	GO:0050731	BP
Positive Regulation Of Peroxisome Proliferator Activated Receptor Signaling Pathway	0.0189176	0.131404	0.352488	-1.55221	8	GO:0035360	BP
Positive Regulation Of Phagocytosis	1.87427e-09	1.46572e-07	0.774939	2.5821	57	GO:0050766	BP
Positive Regulation Of Phosphatase Activity	0.00756838	0.06651	0.407018	1.7431	10	GO:0010922	BP
Positive Regulation Of Phosphatidylinositol 3 Kinase Protein Kinase B Signal Transduction	3.12868e-07	1.46145e-05	0.674963	2.20637	166	GO:0051897	BP
Positive Regulation Of Platelet Activation	0.000175376	0.00355864	0.518848	2.0373	12	GO:0010572	BP
Positive Regulation Of Podosome Assembly	0.00821106	0.070294	0.38073	1.79103	9	GO:0071803	BP
Positive Regulation Of Production Of Molecular Mediator Of Immune Response	4.48773e-08	2.60289e-06	0.719513	2.4054	103	GO:0002702	BP
Positive Regulation Of Prostaglandin Biosynthetic Process	0.00108694	0.0146044	0.45506	1.93958	9	GO:0031394	BP
Positive Regulation Of Protein Containing Complex Assembly	1.12161e-05	0.000357555	0.593325	2.00278	188	GO:0031334	BP
Positive Regulation Of Protein Serine Threonine Kinase Activity	0.000173932	0.00355644	0.518848	1.95243	128	GO:0071902	BP
Positive Regulation Of Pyroptotic Inflammatory Response	0.0101787	0.083624	0.38073	1.69752	5	GO:0140639	BP
Positive Regulation Of Rac Protein Signal Transduction	0.0018611	0.0222183	0.45506	1.94669	14	GO:0035022	BP
Positive Regulation Of Reactive Oxygen Species Biosynthetic Process	0.00965462	0.0799003	0.38073	1.76063	16	GO:1903428	BP
Positive Regulation Of Reactive Oxygen Species Metabolic Process	0.00163077	0.0199827	0.45506	1.91765	57	GO:2000379	BP
Positive Regulation Of Receptor Mediated Endocytosis	8.07924e-06	0.000272968	0.593325	2.26289	56	GO:0048260	BP
Positive Regulation Of Receptor Signaling Pathway Via Stat	0.00718839	0.0642383	0.407018	1.79327	36	GO:1904894	BP
Positive Regulation Of Regulated Secretory Pathway	0.0335572	0.193503	0.321776	1.57383	53	GO:1903307	BP
Positive Regulation Of Response To Biotic Stimulus	2.62116e-13	3.80068e-11	0.932595	2.33884	325	GO:0002833	BP
Positive Regulation Of Response To Cytokine Stimulus	0.006281	0.0576725	0.407018	1.79643	53	GO:0060760	BP
Positive Regulation Of Rig I Signaling Pathway	0.0337894	0.193878	0.321776	1.63268	9	GO:1900246	BP
Positive Regulation Of Secretion	0.00312376	0.0337599	0.431708	1.49949	333	GO:0051047	BP
Positive Regulation Of Small Gtpase Mediated Signal Transduction	0.0224671	0.14684	0.352488	1.58216	67	GO:0051057	BP
Positive Regulation Of Small Molecule Metabolic Process	0.0120577	0.0937669	0.38073	1.52762	153	GO:0062013	BP
Positive Regulation Of Smooth Muscle Cell Proliferation	0.0181823	0.127553	0.352488	1.53662	107	GO:0048661	BP
Positive Regulation Of T Cell Cytokine Production	0.0314203	0.185413	0.321776	1.71538	18	GO:0002726	BP
Positive Regulation Of T Cell Migration	0.000582953	0.0088977	0.477271	2.08785	31	GO:2000406	BP
Positive Regulation Of T Cell Proliferation	7.27464e-06	0.000250651	0.610527	2.30569	74	GO:0042102	BP
Positive Regulation Of T Helper 1 Type Immune Response	0.00123816	0.0161378	0.45506	1.92926	9	GO:0002827	BP
Positive Regulation Of T Helper 17 Cell Differentiation	0.00408536	0.0415496	0.407018	1.84574	9	GO:2000321	BP
Positive Regulation Of T Helper 17 Type Immune Response	0.00216024	0.0250588	0.431708	1.92294	15	GO:2000318	BP
Positive Regulation Of T Helper Cell Differentiation	0.00579586	0.0544389	0.407018	1.85475	19	GO:0045624	BP
Positive Regulation Of Toll Like Receptor 2 Signaling Pathway	0.0302776	0.180731	0.352488	1.64783	7	GO:0034137	BP
Positive Regulation Of Toll Like Receptor 9 Signaling Pathway	0.0113588	0.0899398	0.38073	1.74183	7	GO:0034165	BP
Positive Regulation Of Transcription By Rna Polymerase Iii	0.00806882	0.0697627	0.38073	1.86071	18	GO:0045945	BP
Positive Regulation Of Transferase Activity	0.000768239	0.0110019	0.477271	1.59324	282	GO:0051338	BP
Positive Regulation Of Transmembrane Transport	0.000309326	0.0054844	0.498493	1.77732	201	GO:0034764	BP
Positive Regulation Of Tumor Necrosis Factor Superfamily Cytokine Production	6.57417e-12	7.38003e-10	0.887075	2.70188	94	GO:1903557	BP
Positive Regulation Of Type I Interferon Production	0.000119118	0.00255883	0.538434	2.09522	77	GO:0032481	BP
Positive Regulation Of Type Ii Interferon Production	8.44213e-05	0.00190153	0.538434	2.19667	53	GO:0032729	BP
Positive Regulation Of Unsaturated Fatty Acid Biosynthetic Process	0.00419483	0.0422518	0.407018	1.88674	11	GO:2001280	BP
Positive Regulation Of Vascular Endothelial Growth Factor Production	5.26142e-05	0.00129856	0.557332	2.16311	21	GO:0010575	BP
Positive Regulation Of Vasculature Development	4.54712e-09	3.22938e-07	0.761461	2.38712	151	GO:1904018	BP
Positive Regulation Of Wnt Signaling Pathway	0.0181378	0.127553	0.352488	1.45499	140	GO:0030177	BP
Positive T Cell Selection	0.00506907	0.0487303	0.407018	1.87917	32	GO:0043368	BP
Post Golgi Vesicle Mediated Transport	0.00944158	0.0786045	0.38073	1.58246	100	GO:0006892	BP
Pre B Cell Differentiation	0.0212584	0.141723	0.352488	1.61798	6	GO:0002329	BP
Presynaptic Membrane Assembly	0.0113038	0.0898114	0.38073	1.70086	8	GO:0097105	BP
Production Of Molecular Mediator Involved In Inflammatory Response	1.11768e-07	5.89323e-06	0.704976	2.46795	81	GO:0002532	BP
Production Of Molecular Mediator Of Immune Response	2.29637e-11	2.38548e-09	0.863415	2.41533	202	GO:0002440	BP
Prostaglandin Secretion	0.000483251	0.00768773	0.498493	2.00135	16	GO:0032310	BP
Prostaglandin Transport	0.000822633	0.0117192	0.477271	2.03767	22	GO:0015732	BP
Prostanoid Biosynthetic Process	0.000111875	0.0024409	0.538434	2.12285	29	GO:0046457	BP
Prostanoid Metabolic Process	0.00298593	0.0327277	0.431708	1.79876	46	GO:0006692	BP
Proteasome Mediated Ubiquitin Dependent Protein Catabolic Process	0.0339759	0.194467	0.321776	-1.26352	392	GO:0043161	BP
Protein Autophosphorylation	0.00281635	0.0312352	0.431708	1.65267	180	GO:0046777	BP
Protein Deneddylation	0.0241067	0.154532	0.352488	-1.60463	11	GO:0000338	BP
Protein Dephosphorylation	0.00215236	0.025009	0.431708	1.74321	88	GO:0006470	BP
Protein Folding	0.0179853	0.127213	0.352488	-1.38244	162	GO:0006457	BP
Protein Homotetramerization	0.0338477	0.194053	0.321776	1.49074	51	GO:0051289	BP
Protein Import Into Mitochondrial Matrix	0.0240765	0.154532	0.352488	-1.55289	17	GO:0030150	BP
Protein Localization To Actin Cytoskeleton	0.0348404	0.198436	0.321776	1.56838	5	GO:1903119	BP
Protein Localization To Mitochondrion	0.00141688	0.0180614	0.45506	-1.65342	99	GO:0070585	BP
Protein O Linked Glycosylation Via Serine	0.0282249	0.172018	0.352488	1.66156	9	GO:0006493	BP
Protein Polymerization	0.011715	0.0919241	0.38073	1.48733	252	GO:0051258	BP
Protein Processing	0.0322006	0.188391	0.321776	1.41329	183	GO:0016485	BP
Protein Repair	0.0276044	0.169125	0.352488	-1.5532	5	GO:0030091	BP
Protein Rna Complex Organization	0.000241046	0.00449779	0.518848	-1.67858	179	GO:0071826	BP
Protein Targeting To Mitochondrion	0.000312755	0.00551712	0.498493	-1.83693	71	GO:0006626	BP
Protein Transmembrane Import Into Intracellular Organelle	0.00730213	0.0648691	0.407018	-1.6903	37	GO:0044743	BP
Protein Transmembrane Transport	0.0195832	0.134372	0.352488	-1.49405	68	GO:0071806	BP
Proton Motive Force Driven Atp Synthesis	8.4402e-09	5.70328e-07	0.74774	-2.40098	61	GO:0015986	BP
Proton Transmembrane Transport	0.000541662	0.00841511	0.477271	-1.69615	120	GO:1902600	BP
Purine Containing Compound Biosynthetic Process	0.00037596	0.00639775	0.498493	-1.56044	217	GO:0072522	BP
Purine Containing Compound Metabolic Process	0.0156885	0.113742	0.352488	-1.2492	486	GO:0072521	BP
Purine Nucleotide Biosynthetic Process	0.00066338	0.00980281	0.477271	-1.66614	164	GO:0006164	BP
Purinergic Nucleotide Receptor Signaling Pathway	0.000147333	0.00306101	0.518848	2.15475	23	GO:0035590	BP
Pyroptotic Inflammatory Response	0.00341673	0.0361405	0.431708	2.00218	27	GO:0070269	BP
Rac Protein Signal Transduction	0.0035872	0.0376008	0.431708	1.82599	51	GO:0016601	BP
Reactive Nitrogen Species Metabolic Process	0.000280788	0.00511592	0.498493	2.00318	76	GO:2001057	BP
Reactive Oxygen Species Biosynthetic Process	0.00531432	0.0505296	0.407018	1.79851	56	GO:1903409	BP
Reactive Oxygen Species Metabolic Process	0.000387101	0.00652355	0.498493	1.81021	192	GO:0072593	BP
Receptor Catabolic Process	0.00608192	0.0562901	0.407018	1.88191	28	GO:0032801	BP
Receptor Internalization	0.0147951	0.108852	0.38073	1.47472	141	GO:0031623	BP
Receptor Mediated Endocytosis	1.05956e-05	0.000343756	0.593325	1.92148	242	GO:0006898	BP
Receptor Metabolic Process	0.0102605	0.0838937	0.38073	1.64808	75	GO:0043112	BP
Regulated Exocytosis	0.000282424	0.00511893	0.498493	1.77292	224	GO:0045055	BP
Regulation Of Actin Filament Based Process	1.02919e-05	0.000336298	0.593325	1.80862	363	GO:0032970	BP
Regulation Of Actin Filament Length	0.00390309	0.0400671	0.431708	1.64124	143	GO:0030832	BP
Regulation Of Actin Filament Organization	0.00744363	0.0656625	0.407018	1.55196	244	GO:0110053	BP
Regulation Of Acute Inflammatory Response	2.61633e-10	2.36489e-08	0.814036	2.59678	30	GO:0002673	BP
Regulation Of Acute Inflammatory Response To Antigenic Stimulus	6.01957e-05	0.0014497	0.557332	2.12978	11	GO:0002864	BP
Regulation Of Adaptive Immune Response	3.2851e-14	5.44387e-12	0.965328	2.69169	150	GO:0002819	BP
Regulation Of Adiponectin Secretion	0.0251428	0.159375	0.352488	1.61135	5	GO:0070163	BP
Regulation Of Alcohol Biosynthetic Process	0.000613742	0.00920613	0.477271	2.01573	50	GO:1902930	BP
Regulation Of Alpha Beta T Cell Activation	5.1375e-05	0.00127249	0.557332	2.12283	86	GO:0046634	BP
Regulation Of Alpha Beta T Cell Differentiation	0.00051632	0.00811194	0.477271	2.01344	56	GO:0046637	BP
Regulation Of Animal Organ Formation	0.0339587	0.194467	0.321776	1.5811	21	GO:0003156	BP
Regulation Of Anoikis	0.0252715	0.159754	0.352488	1.62208	21	GO:2000209	BP
Regulation Of Antigen Processing And Presentation	0.00279136	0.0311344	0.431708	1.87348	16	GO:0002577	BP
Regulation Of Antigen Receptor Mediated Signaling Pathway	0.00170618	0.0207605	0.45506	1.84018	54	GO:0050854	BP
Regulation Of Apoptotic Cell Clearance	7.98317e-05	0.00183376	0.538434	1.90202	6	GO:2000425	BP
Regulation Of Autophagy	0.0156446	0.113541	0.352488	1.37906	282	GO:0010506	BP
Regulation Of B Cell Activation	1.43914e-06	5.8965e-05	0.643552	2.30114	107	GO:0050864	BP
Regulation Of B Cell Differentiation	0.000736135	0.0106518	0.477271	2.11323	30	GO:0045577	BP
Regulation Of B Cell Mediated Immunity	2.54134e-05	0.000722442	0.57561	2.31973	41	GO:0002712	BP
Regulation Of B Cell Proliferation	4.43896e-09	3.18507e-07	0.761461	2.52783	55	GO:0030888	BP
Regulation Of B Cell Receptor Signaling Pathway	0.00781586	0.0681684	0.38073	1.81596	14	GO:0050855	BP
Regulation Of Body Fluid Levels	1.35325e-05	0.000420727	0.593325	1.88713	260	GO:0050878	BP
Regulation Of Bone Remodeling	0.00144136	0.0182205	0.45506	2.02528	49	GO:0046850	BP
Regulation Of Calcium Ion Transmembrane Transport	0.0018023	0.0216823	0.45506	1.70867	146	GO:1903169	BP
Regulation Of Calcium Ion Transport	0.000234373	0.00440875	0.518848	1.77598	222	GO:0051924	BP
Regulation Of Carbohydrate Biosynthetic Process	0.024102	0.154532	0.352488	1.56967	91	GO:0043255	BP
Regulation Of Carbohydrate Metabolic Process	0.0240463	0.154532	0.352488	1.43706	166	GO:0006109	BP
Regulation Of Cd4 Positive Alpha Beta T Cell Activation	0.000314883	0.0055198	0.498493	2.0458	60	GO:2000514	BP
Regulation Of Cd4 Positive Alpha Beta T Cell Differentiation	0.000121716	0.0025986	0.538434	2.11266	42	GO:0043370	BP
Regulation Of Cd8 Positive Alpha Beta T Cell Activation	0.0166065	0.119289	0.352488	1.71353	14	GO:2001185	BP
Regulation Of Cd8 Positive Alpha Beta T Cell Differentiation	0.00439202	0.0434829	0.407018	1.73868	6	GO:0043376	BP
Regulation Of Cell Activation	1.05115e-19	5.22572e-17	1.15122	2.42648	477	GO:0050865	BP
Regulation Of Cell Adhesion Mediated By Integrin	5.64648e-07	2.47167e-05	0.659444	2.44848	43	GO:0033628	BP
Regulation Of Cell Cell Adhesion	7.94991e-16	1.62739e-13	1.02767	2.37611	376	GO:0022407	BP
Regulation Of Cell Cell Adhesion Mediated By Integrin	0.000189751	0.00375189	0.518848	2.01487	9	GO:0033632	BP
Regulation Of Cell Killing	8.20344e-07	3.50282e-05	0.659444	2.4084	62	GO:0031341	BP
Regulation Of Cell Morphogenesis	0.00421216	0.042365	0.407018	1.58373	258	GO:0022604	BP
Regulation Of Cell Projection Assembly	0.0122199	0.0948169	0.38073	1.46278	185	GO:0060491	BP
Regulation Of Cell Shape	0.00718989	0.0642383	0.407018	1.64574	129	GO:0008360	BP
Regulation Of Cell Size	0.0068545	0.0617971	0.407018	1.5311	197	GO:0008361	BP
Regulation Of Cellular Component Size	0.000743523	0.010692	0.477271	1.60492	359	GO:0032535	BP
Regulation Of Cellular Extravasation	0.00163044	0.0199827	0.45506	2.00894	32	GO:0002691	BP
Regulation Of Chemotaxis	1.29012e-07	6.60236e-06	0.690132	2.22822	177	GO:0050920	BP
Regulation Of Chloride Transport	0.0337318	0.193828	0.321776	1.55953	6	GO:2001225	BP
Regulation Of Chronic Inflammatory Response	0.00815852	0.070294	0.38073	1.71702	5	GO:0002676	BP
Regulation Of Complement Activation	0.000172579	0.00354322	0.518848	2.07891	13	GO:0030449	BP
Regulation Of Cytokine Production Involved In Immune Response	2.41085e-08	1.52541e-06	0.733762	2.46937	93	GO:0002718	BP
Regulation Of Cytoplasmic Pattern Recognition Receptor Signaling Pathway	0.000136788	0.0028678	0.518848	1.97887	108	GO:0039531	BP
Regulation Of Cytoskeleton Organization	0.000193183	0.00378748	0.518848	1.60301	489	GO:0051493	BP
Regulation Of D Glucose Transmembrane Transport	0.00199751	0.023524	0.431708	1.86879	70	GO:0010827	BP
Regulation Of Defense Response To Virus	0.0201295	0.136793	0.352488	1.57477	50	GO:0050688	BP
Regulation Of Dendritic Cell Antigen Processing And Presentation	0.00462942	0.0455739	0.407018	1.78956	8	GO:0002604	BP
Regulation Of Dendritic Cell Differentiation	0.000893537	0.0124842	0.477271	1.88436	7	GO:2001198	BP
Regulation Of Dephosphorylation	0.0321972	0.188391	0.321776	1.59598	32	GO:0035303	BP
Regulation Of Developmental Growth	0.00090938	0.0126333	0.477271	1.55532	337	GO:0048638	BP
Regulation Of Dna Binding Transcription Factor Activity	0.000433976	0.00715752	0.498493	1.69206	289	GO:0051090	BP
Regulation Of Endocytosis	4.00925e-08	2.36478e-06	0.719513	2.09068	298	GO:0030100	BP
Regulation Of Endothelial Cell Chemotaxis	8.2778e-05	0.00187666	0.538434	2.14255	20	GO:2001026	BP
Regulation Of Endothelial Cell Differentiation	0.033132	0.191527	0.321776	1.51197	39	GO:0045601	BP
Regulation Of Endothelial Cell Migration	0.0133579	0.101428	0.38073	1.52273	162	GO:0010594	BP
Regulation Of Endothelial Tube Morphogenesis	0.0190207	0.131725	0.352488	1.62372	6	GO:1901509	BP
Regulation Of Epithelial Cell Differentiation	0.00190671	0.0226849	0.45506	1.74479	139	GO:0030856	BP
Regulation Of Epithelial To Mesenchymal Transition Involved In Endocardial Cushion Formation	0.0279714	0.170923	0.352488	1.58987	6	GO:1905005	BP
Regulation Of Erythrocyte Differentiation	0.00177241	0.0214913	0.45506	2.0396	47	GO:0045646	BP
Regulation Of Establishment Of Protein Localization To Chromosome	0.0133926	0.101428	0.38073	-1.66692	12	GO:0070202	BP
Regulation Of Exocytosis	0.00649023	0.0591613	0.407018	1.52546	191	GO:0017157	BP
Regulation Of Fatty Acid Transport	0.0149051	0.10943	0.38073	1.7025	32	GO:2000191	BP
Regulation Of Fc Receptor Mediated Stimulatory Signaling Pathway	0.0295317	0.177496	0.352488	1.647	12	GO:0060368	BP
Regulation Of Fever Generation	0.00018781	0.00372409	0.518848	1.97739	8	GO:0031620	BP
Regulation Of Filopodium Assembly	0.0270731	0.167195	0.352488	1.53448	48	GO:0051489	BP
Regulation Of G Protein Coupled Receptor Signaling Pathway	0.00241442	0.027503	0.431708	1.70187	135	GO:0008277	BP
Regulation Of Germinal Center Formation	0.00412842	0.041817	0.407018	1.80647	7	GO:0002634	BP
Regulation Of Granulocyte Chemotaxis	1.87128e-05	0.000554218	0.57561	2.2399	45	GO:0071622	BP
Regulation Of Granulocyte Differentiation	0.000199593	0.00388036	0.518848	2.19209	18	GO:0030852	BP
Regulation Of Gtpase Activity	0.000688064	0.010146	0.477271	1.6946	196	GO:0043087	BP
Regulation Of Heat Generation	0.00119704	0.0157494	0.45506	1.97592	13	GO:0031650	BP
Regulation Of Hemopoiesis	4.67451e-09	3.28632e-07	0.761461	2.09153	344	GO:1903706	BP
Regulation Of Hepatocyte Apoptotic Process	0.0249863	0.158962	0.352488	1.59992	10	GO:1903943	BP
Regulation Of Humoral Immune Response	3.11598e-06	0.000117228	0.627257	2.34459	23	GO:0002920	BP
Regulation Of Humoral Immune Response Mediated By Circulating Immunoglobulin	0.0102062	0.083624	0.38073	1.77503	9	GO:0002923	BP
Regulation Of Hydrolase Activity	0.00160727	0.0197993	0.45506	1.56708	318	GO:0051336	BP
Regulation Of Hypersensitivity	7.79984e-05	0.00179758	0.538434	1.87647	5	GO:0002883	BP
Regulation Of Icosanoid Secretion	0.00369651	0.0382853	0.431708	1.88634	20	GO:0032303	BP
Regulation Of Immune Effector Process	2.32484e-25	3.23617e-22	1.30309	2.81901	284	GO:0002697	BP
Regulation Of Immunoglobulin Production	0.00180686	0.0216823	0.45506	1.84769	55	GO:0002637	BP
Regulation Of Inclusion Body Assembly	0.00971892	0.0802634	0.38073	-1.66741	17	GO:0090083	BP
Regulation Of Inflammatory Response	3.15049e-25	3.65457e-22	1.30309	2.82894	276	GO:0050727	BP
Regulation Of Inflammatory Response To Antigenic Stimulus	0.000114852	0.00249025	0.538434	2.12203	20	GO:0002861	BP
Regulation Of Inflammatory Response To Wounding	0.004009	0.0409129	0.407018	1.85193	9	GO:0106014	BP
Regulation Of Innate Immune Response	5.80492e-16	1.26257e-13	1.02767	2.4296	366	GO:0045088	BP
Regulation Of Inositol Phosphate Biosynthetic Process	0.00104858	0.014282	0.45506	1.98616	13	GO:0010919	BP
Regulation Of Integrin Activation	7.95776e-06	0.000270176	0.593325	2.19003	14	GO:0033623	BP
Regulation Of Interleukin 18 Production	0.000414131	0.00691212	0.498493	1.98537	9	GO:0032661	BP
Regulation Of Interleukin 4 Mediated Signaling Pathway	0.00909089	0.0765086	0.38073	1.70994	5	GO:1902214	BP
Regulation Of Interleukin 4 Production	0.00955219	0.0793356	0.38073	1.79462	20	GO:0032673	BP
Regulation Of Jnk Cascade	0.0037214	0.0384858	0.431708	1.65324	135	GO:0046328	BP
Regulation Of Jun Kinase Activity	0.0294331	0.177294	0.352488	1.47785	54	GO:0043506	BP
Regulation Of Kidney Development	0.0275961	0.169125	0.352488	1.64087	26	GO:0090183	BP
Regulation Of Kinase Activity	5.62567e-05	0.00136904	0.557332	1.6564	425	GO:0043549	BP
Regulation Of Lamellipodium Assembly	0.0323952	0.188821	0.321776	1.53942	37	GO:0010591	BP
Regulation Of Lamellipodium Organization	0.0255395	0.160157	0.352488	1.58449	47	GO:1902743	BP
Regulation Of Leukocyte Adhesion To Vascular Endothelial Cell	6.663e-05	0.00157736	0.538434	2.22125	24	GO:1904994	BP
Regulation Of Leukocyte Apoptotic Process	1.48429e-05	0.000453099	0.593325	2.165	85	GO:2000106	BP
Regulation Of Leukocyte Chemotaxis	3.14788e-08	1.93887e-06	0.719513	2.48007	96	GO:0002688	BP
Regulation Of Leukocyte Degranulation	1.05554e-07	5.60807e-06	0.704976	2.39311	38	GO:0043300	BP
Regulation Of Leukocyte Differentiation	1.7962e-08	1.15755e-06	0.733762	2.11885	269	GO:1902105	BP
Regulation Of Leukocyte Mediated Immunity	2.31215e-19	1.07284e-16	1.13309	2.83256	169	GO:0002703	BP
Regulation Of Leukocyte Migration	4.70174e-18	1.55829e-15	1.09593	2.75667	184	GO:0002685	BP
Regulation Of Leukocyte Proliferation	2.4576e-13	3.63934e-11	0.932595	2.53423	201	GO:0070663	BP
Regulation Of Leukocyte Tethering Or Rolling	0.000275166	0.00503988	0.498493	2.01424	12	GO:1903236	BP
Regulation Of Lipid Biosynthetic Process	0.00972156	0.0802634	0.38073	1.56383	168	GO:0046890	BP
Regulation Of Lipid Catabolic Process	0.00517592	0.0494841	0.407018	1.75764	50	GO:0050994	BP
Regulation Of Lipid Localization	4.60734e-05	0.00117462	0.557332	2.00647	142	GO:1905952	BP
Regulation Of Lipid Metabolic Process	0.000943396	0.0130072	0.477271	1.62824	290	GO:0019216	BP
Regulation Of Lipid Storage	3.77675e-05	0.000991931	0.557332	2.23805	40	GO:0010883	BP
Regulation Of Lipopolysaccharide Mediated Signaling Pathway	0.000236051	0.00442834	0.518848	2.15294	22	GO:0031664	BP
Regulation Of Lymphocyte Activation	1.48501e-15	2.87102e-13	1.01754	2.39034	373	GO:0051249	BP
Regulation Of Lymphocyte Apoptotic Process	0.0306016	0.18204	0.352488	1.51981	57	GO:0070228	BP
Regulation Of Lymphocyte Chemotaxis	0.0142239	0.105881	0.38073	1.70332	16	GO:1901623	BP
Regulation Of Lymphocyte Differentiation	0.000127686	0.00271771	0.518848	1.90292	167	GO:0045619	BP
Regulation Of Lymphocyte Mediated Immunity	3.48938e-10	3.1136e-08	0.814036	2.51738	120	GO:0002706	BP
Regulation Of Lymphocyte Migration	3.61291e-06	0.000133755	0.627257	2.27007	54	GO:2000401	BP
Regulation Of Macrophage Activation	0.00819188	0.070294	0.38073	1.69913	46	GO:0043030	BP
Regulation Of Macrophage Apoptotic Process	0.00792045	0.0689079	0.38073	1.74307	8	GO:2000109	BP
Regulation Of Macrophage Chemotaxis	0.00604295	0.0561534	0.407018	1.85054	22	GO:0010758	BP
Regulation Of Macrophage Cytokine Production	0.00151951	0.0189871	0.45506	1.94896	39	GO:0010935	BP
Regulation Of Macrophage Derived Foam Cell Differentiation	0.000983585	0.0135025	0.45506	2.07023	19	GO:0010743	BP
Regulation Of Macrophage Migration	0.000588713	0.00892689	0.477271	2.08447	36	GO:1905521	BP
Regulation Of Map Kinase Activity	4.10546e-05	0.00107019	0.557332	2.00864	138	GO:0043405	BP
Regulation Of Mast Cell Activation	0.00196144	0.0231383	0.431708	2.00085	18	GO:0033003	BP
Regulation Of Mast Cell Activation Involved In Immune Response	0.00784773	0.0683607	0.38073	1.72222	5	GO:0033006	BP
Regulation Of Mast Cell Chemotaxis	0.00404826	0.0412531	0.407018	1.81397	7	GO:0060753	BP
Regulation Of Mast Cell Degranulation	0.000180212	0.00362508	0.518848	2.23143	27	GO:0043304	BP
Regulation Of Matrix Metallopeptidase Secretion	0.0250965	0.15936	0.352488	1.66948	7	GO:1904464	BP
Regulation Of Membrane Invagination	1.4774e-06	6.01327e-05	0.643552	2.24386	15	GO:1905153	BP
Regulation Of Mitochondrial Gene Expression	0.00359894	0.0376671	0.431708	-1.73235	36	GO:0062125	BP
Regulation Of Mitochondrial Translation	0.0033664	0.0357712	0.431708	-1.81298	26	GO:0070129	BP
Regulation Of Monoatomic Ion Transmembrane Transport	0.0141354	0.105334	0.38073	1.42871	296	GO:0034765	BP
Regulation Of Monoatomic Ion Transport	0.000352508	0.00607291	0.498493	1.58837	419	GO:0043269	BP
Regulation Of Monocyte Chemotaxis	0.00030968	0.0054844	0.498493	2.13901	22	GO:0090025	BP
Regulation Of Mononuclear Cell Migration	9.83944e-10	8.15268e-08	0.788187	2.48838	115	GO:0071675	BP
Regulation Of Morphogenesis Of An Epithelium	0.0265011	0.16498	0.352488	1.49609	58	GO:1905330	BP
Regulation Of Myeloid Cell Apoptotic Process	0.00307683	0.0334605	0.431708	1.95261	30	GO:0033032	BP
Regulation Of Myeloid Cell Differentiation	1.12507e-05	0.000357555	0.593325	2.0261	183	GO:0045637	BP
Regulation Of Myeloid Leukocyte Differentiation	0.000713424	0.0103924	0.477271	1.9147	112	GO:0002761	BP
Regulation Of Myeloid Leukocyte Mediated Immunity	1.87464e-11	1.97689e-09	0.863415	2.68475	44	GO:0002886	BP
Regulation Of Natural Killer Cell Mediated Immunity	0.022469	0.14684	0.352488	1.65313	31	GO:0002715	BP
Regulation Of Neuroinflammatory Response	0.00268433	0.0300852	0.431708	1.91329	25	GO:0150077	BP
Regulation Of Neutrophil Activation	2.7959e-05	0.000772201	0.57561	2.08418	9	GO:1902563	BP
Regulation Of Neutrophil Apoptotic Process	0.0288418	0.174707	0.352488	1.65917	9	GO:0033029	BP
Regulation Of Neutrophil Chemotaxis	0.00017591	0.0035591	0.518848	2.20747	30	GO:0090022	BP
Regulation Of Neutrophil Degranulation	0.00234271	0.0267738	0.431708	1.76725	6	GO:0043313	BP
Regulation Of Neutrophil Migration	2.8018e-07	1.32657e-05	0.674963	2.44207	44	GO:1902622	BP
Regulation Of Nitric Oxide Metabolic Process	0.000117255	0.00252662	0.538434	2.14495	58	GO:0080164	BP
Regulation Of Nk T Cell Activation	0.00857103	0.0725722	0.38073	1.73533	10	GO:0051133	BP
Regulation Of Nk T Cell Proliferation	0.0311681	0.184308	0.352488	1.57644	6	GO:0051140	BP
Regulation Of Non Canonical Nf Kappab Signal Transduction	2.54787e-06	9.85177e-05	0.627257	2.24165	85	GO:1901222	BP
Regulation Of Opsonization	0.0182716	0.127553	0.352488	1.64203	5	GO:1903027	BP
Regulation Of Organic Acid Transport	0.0214632	0.142814	0.352488	1.50667	83	GO:0032890	BP
Regulation Of P38mapk Cascade	0.00333353	0.0355304	0.431708	1.89745	41	GO:1900744	BP
Regulation Of Pattern Recognition Receptor Signaling Pathway	7.04493e-05	0.00165093	0.538434	1.99956	156	GO:0062207	BP
Regulation Of Peptidyl Tyrosine Phosphorylation	5.66939e-05	0.00137488	0.557332	1.97453	176	GO:0050730	BP
Regulation Of Phagocytosis	8.6033e-13	1.12979e-10	0.921426	2.6999	85	GO:0050764	BP
Regulation Of Platelet Activation	0.00194768	0.0230541	0.45506	1.96946	40	GO:0010543	BP
Regulation Of Podosome Assembly	0.000438746	0.00720415	0.498493	2.03229	13	GO:0071801	BP
Regulation Of Production Of Molecular Mediator Of Immune Response	1.05523e-08	6.99469e-07	0.74774	2.33562	143	GO:0002700	BP
Regulation Of Prostaglandin Secretion	0.000419864	0.00697435	0.498493	2.03964	14	GO:0032306	BP
Regulation Of Protein Containing Complex Assembly	1.06189e-05	0.000343756	0.593325	1.79059	392	GO:0043254	BP
Regulation Of Protein Maturation	0.00703598	0.0631877	0.407018	1.66808	55	GO:1903317	BP
Regulation Of Protein Polymerization	0.0139896	0.104388	0.38073	1.51764	181	GO:0032271	BP
Regulation Of Protein Serine Threonine Kinase Activity	0.00105107	0.014288	0.45506	1.72151	219	GO:0071900	BP
Regulation Of Protein Targeting	0.0323055	0.188629	0.321776	-1.43382	53	GO:1903533	BP
Regulation Of Protein Targeting To Membrane	0.0133624	0.101428	0.38073	-1.59962	35	GO:0090313	BP
Regulation Of Protein Tyrosine Kinase Activity	0.00498303	0.0483035	0.407018	1.74009	45	GO:0061097	BP
Regulation Of Rac Protein Signal Transduction	0.00798998	0.069167	0.38073	1.83207	28	GO:0035020	BP
Regulation Of Reactive Oxygen Species Metabolic Process	0.00203299	0.0238208	0.431708	1.70054	123	GO:2000377	BP
Regulation Of Receptor Catabolic Process	0.032831	0.190122	0.321776	1.67494	11	GO:2000644	BP
Regulation Of Receptor Mediated Endocytosis	0.000570186	0.00877144	0.477271	1.8567	128	GO:0048259	BP
Regulation Of Receptor Signaling Pathway Via Stat	0.000619895	0.00927842	0.477271	2.00522	74	GO:1904892	BP
Regulation Of Regulated Secretory Pathway	0.00121212	0.0159176	0.45506	1.8121	136	GO:1903305	BP
Regulation Of Release Of Sequestered Calcium Ion Into Cytosol	0.0201295	0.136793	0.352488	1.55596	66	GO:0051279	BP
Regulation Of Respiratory Burst	0.000186317	0.00370675	0.518848	2.07906	14	GO:0060263	BP
Regulation Of Respiratory Burst Involved In Inflammatory Response	0.00155777	0.0192987	0.45506	1.86238	7	GO:0060264	BP
Regulation Of Response To Biotic Stimulus	3.34298e-18	1.22459e-15	1.10534	2.44608	438	GO:0002831	BP
Regulation Of Response To Cytokine Stimulus	0.000773835	0.0110593	0.477271	1.80167	135	GO:0060759	BP
Regulation Of Rho Protein Signal Transduction	0.0203436	0.137857	0.352488	1.59138	80	GO:0035023	BP
Regulation Of Rig I Signaling Pathway	0.0139934	0.104388	0.38073	1.72682	17	GO:0039535	BP
Regulation Of Rna Splicing	0.0217038	0.143742	0.352488	-1.35988	168	GO:0043484	BP
Regulation Of Saliva Secretion	0.0228567	0.148954	0.352488	1.60894	6	GO:0046877	BP
Regulation Of Skeletal Muscle Cell Proliferation	0.0316362	0.186127	0.321776	1.64045	15	GO:0014857	BP
Regulation Of Small Gtpase Mediated Signal Transduction	0.000166946	0.0034479	0.518848	1.76249	223	GO:0051056	BP
Regulation Of Small Molecule Metabolic Process	0.0287273	0.174317	0.352488	1.34029	303	GO:0062012	BP
Regulation Of Superoxide Anion Generation	0.0138669	0.10389	0.38073	1.70898	21	GO:0032928	BP
Regulation Of Superoxide Metabolic Process	0.00616092	0.0567947	0.407018	1.8054	25	GO:0090322	BP
Regulation Of Supramolecular Fiber Organization	0.00168308	0.0205513	0.45506	1.52635	356	GO:1902903	BP
Regulation Of T Cell Activation	4.47916e-11	4.45356e-09	0.851339	2.29162	271	GO:0050863	BP
Regulation Of T Cell Chemotaxis	0.032831	0.190122	0.321776	1.67586	11	GO:0010819	BP
Regulation Of T Cell Cytokine Production	0.00544635	0.0514337	0.407018	1.88311	24	GO:0002724	BP
Regulation Of T Cell Mediated Cytotoxicity	0.00181103	0.0216949	0.45506	1.96479	22	GO:0001914	BP
Regulation Of T Cell Mediated Immunity	0.00041361	0.00691212	0.498493	2.03743	61	GO:0002709	BP
Regulation Of T Cell Migration	0.000216639	0.0041197	0.518848	2.20479	41	GO:2000404	BP
Regulation Of T Cell Proliferation	3.24299e-08	1.97993e-06	0.719513	2.37806	133	GO:0042129	BP
Regulation Of T Cell Receptor Signaling Pathway	0.00781124	0.0681684	0.407018	1.74942	43	GO:0050856	BP
Regulation Of T Helper 1 Type Immune Response	0.000489376	0.00775867	0.477271	2.1391	19	GO:0002825	BP
Regulation Of T Helper 17 Cell Differentiation	0.00257325	0.0290273	0.431708	1.97787	18	GO:2000319	BP
Regulation Of T Helper 17 Type Immune Response	0.00707287	0.0634371	0.407018	1.82773	27	GO:2000316	BP
Regulation Of T Helper 2 Cell Differentiation	0.0270209	0.167169	0.352488	1.70543	11	GO:0045628	BP
Regulation Of T Helper Cell Differentiation	0.00207988	0.0242478	0.431708	1.95171	31	GO:0045622	BP
Regulation Of Termination Of Dna Templated Transcription	0.00676604	0.0610786	0.407018	1.70146	6	GO:0031554	BP
Regulation Of Tissue Remodeling	0.0013673	0.0174934	0.45506	1.81598	64	GO:0034103	BP
Regulation Of Toll Like Receptor 2 Signaling Pathway	0.0110135	0.0886175	0.38073	1.79666	11	GO:0034135	BP
Regulation Of Transferase Activity	0.000823372	0.0117192	0.477271	1.53413	484	GO:0051338	BP
Regulation Of Transmembrane Transport	0.000140026	0.00292666	0.518848	1.63818	417	GO:0034762	BP
Regulation Of Triglyceride Biosynthetic Process	0.000544073	0.00843374	0.477271	2.07838	22	GO:0010866	BP
Regulation Of Triglyceride Catabolic Process	0.0220556	0.144896	0.352488	1.68334	9	GO:0010896	BP
Regulation Of Triglyceride Metabolic Process	3.75296e-05	0.000989417	0.557332	2.23869	39	GO:0090207	BP
Regulation Of Trophoblast Cell Migration	0.0294726	0.177294	0.352488	1.63628	14	GO:1901163	BP
Regulation Of Unsaturated Fatty Acid Biosynthetic Process	0.00796473	0.0691204	0.38073	1.81292	14	GO:2001279	BP
Regulation Of Vasculature Development	1.54725e-09	1.22374e-07	0.788187	2.26174	262	GO:1901342	BP
Reproductive System Development	0.000306057	0.00544797	0.498493	1.68078	281	GO:0061458	BP
Respiratory Burst	9.9504e-06	0.000326674	0.593325	2.31583	25	GO:0045730	BP
Respiratory Burst Involved In Defense Response	0.00500978	0.0483632	0.407018	1.8359	12	GO:0002679	BP
Respiratory Burst Involved In Inflammatory Response	0.0022226	0.025584	0.431708	1.89065	9	GO:0002536	BP
Response To Alcohol	0.0182368	0.127553	0.352488	1.45745	244	GO:0097305	BP
Response To Amine	0.031835	0.187138	0.321776	-1.4995	48	GO:0014075	BP
Response To Amphetamine	0.00663613	0.0602411	0.407018	-1.72146	30	GO:0001975	BP
Response To Amyloid Beta	0.033623	0.193722	0.321776	1.59115	41	GO:1904645	BP
Response To Angiotensin	0.00601178	0.0559385	0.407018	1.7054	45	GO:1990776	BP
Response To Atp	0.0238646	0.153937	0.352488	1.63884	30	GO:0033198	BP
Response To Bacterial Lipoprotein	0.000448572	0.00731162	0.498493	1.84724	6	GO:0032493	BP
Response To Bacterium	2.51453e-32	8.75058e-29	1.47456	2.76434	483	GO:0009617	BP
Response To Chemokine	3.32103e-06	0.000124271	0.627257	2.29137	52	GO:1990868	BP
Response To Cisplatin	0.0116114	0.0914203	0.38073	1.69713	8	GO:0072718	BP
Response To Corticosterone	0.0111654	0.0891753	0.38073	-1.69367	18	GO:0051412	BP
Response To Corticotropin Releasing Hormone	0.00244866	0.0278476	0.431708	-1.71087	5	GO:0043435	BP
Response To Dsrna	0.0234108	0.151854	0.352488	1.56378	39	GO:0043331	BP
Response To Ether	0.0254745	0.160157	0.352488	1.65406	17	GO:0045472	BP
Response To Fatty Acid	0.00112775	0.0150367	0.45506	1.95597	57	GO:0070542	BP
Response To Fibroblast Growth Factor	0.0256165	0.160334	0.352488	1.4726	142	GO:0071774	BP
Response To Folic Acid	0.00223644	0.0256858	0.431708	1.84058	10	GO:0051593	BP
Response To Food	0.0272756	0.168147	0.352488	-1.60464	34	GO:0032094	BP
Response To Fungus	5.88521e-07	2.56006e-05	0.659444	2.4228	40	GO:0009620	BP
Response To Hydrostatic Pressure	0.0153484	0.111625	0.38073	1.6397	6	GO:0051599	BP
Response To Interleukin 1	0.00576725	0.0542434	0.407018	1.70135	87	GO:0070555	BP
Response To Interleukin 17	2.8963e-05	0.000793631	0.57561	2.19679	20	GO:0097396	BP
Response To Interleukin 6	0.012568	0.0973008	0.38073	1.73008	30	GO:0070741	BP
Response To Interleukin 9	0.0337318	0.193828	0.321776	1.56487	6	GO:0071104	BP
Response To Isoquinoline Alkaloid	0.0133703	0.101428	0.38073	-1.66916	20	GO:0014072	BP
Response To Lipoprotein Particle	0.00142146	0.0180866	0.45506	2.07113	28	GO:0055094	BP
Response To Macrophage Colony Stimulating Factor	0.0260819	0.162954	0.352488	1.54253	57	GO:0036005	BP
Response To Mechanical Stimulus	0.0198504	0.13545	0.352488	1.45328	205	GO:0009612	BP
Response To Molecule Of Bacterial Origin	4.14447e-18	1.44228e-15	1.09593	2.60928	287	GO:0002237	BP
Response To Molecule Of Fungal Origin	0.00986788	0.0813749	0.38073	1.70247	5	GO:0002238	BP
Response To Nerve Growth Factor	0.0212406	0.141723	0.352488	1.52828	54	GO:1990089	BP
Response To Nutrient Levels	0.0132234	0.10089	0.38073	1.36547	456	GO:0031667	BP
Response To Organophosphorus	0.00942458	0.078557	0.38073	1.60142	116	GO:0046683	BP
Response To Parathyroid Hormone	0.00409526	0.0415496	0.407018	-1.73036	10	GO:0071107	BP
Response To Peptide Hormone	0.0284074	0.172688	0.352488	1.32598	447	GO:0043434	BP
Response To Peptidoglycan	0.0137983	0.103662	0.38073	1.75107	12	GO:0032494	BP
Response To Phorbol 13 Acetate 12 Myristate	0.00741489	0.0655751	0.407018	-1.71194	9	GO:1904627	BP
Response To Prostaglandin	0.0322376	0.188391	0.321776	1.67363	24	GO:0034694	BP
Response To Protozoan	0.000335666	0.00583301	0.498493	2.1282	22	GO:0001562	BP
Response To Purine Containing Compound	0.00307138	0.0334536	0.431708	1.71232	133	GO:0014074	BP
Response To Stem Cell Factor	0.01961	0.134372	0.352488	1.5824	50	GO:0036215	BP
Response To Thyroid Hormone	0.0209052	0.140739	0.352488	1.68542	20	GO:0097066	BP
Response To Transforming Growth Factor Beta	0.00502394	0.0483632	0.407018	1.57609	256	GO:0071559	BP
Response To Tumor Cell	0.0350085	0.198906	0.321776	1.58062	36	GO:0002347	BP
Response To Tumor Necrosis Factor	0.00184831	0.0221035	0.45506	1.69959	173	GO:0034612	BP
Response To Type Ii Interferon	1.35437e-05	0.000420727	0.593325	2.15389	103	GO:0034341	BP
Response To Virus	4.62553e-08	2.66064e-06	0.719513	2.07296	303	GO:0009615	BP
Response To Water	0.00395712	0.0404428	0.407018	1.79134	10	GO:0009415	BP
Response To Wounding	5.03828e-05	0.00125237	0.557332	1.66955	456	GO:0009611	BP
Response To Yeast	0.000454377	0.00738894	0.498493	1.95554	10	GO:0001878	BP
Retina Development In Camera Type Eye	0.0205594	0.139061	0.352488	1.44549	169	GO:0060041	BP
Rho Protein Signal Transduction	0.00918748	0.0769493	0.38073	1.58025	124	GO:0007266	BP
Ribonucleoprotein Complex Biogenesis	1.75762e-05	0.000527287	0.57561	-1.59817	412	GO:0022613	BP
Ribose Phosphate Biosynthetic Process	0.000447124	0.00730512	0.498493	-1.62956	156	GO:0046390	BP
Ribose Phosphate Metabolic Process	0.00482285	0.0472111	0.407018	-1.38174	317	GO:0019693	BP
Ribosomal Small Subunit Assembly	0.0349998	0.198906	0.321776	-1.55578	19	GO:0000028	BP
Ribosomal Small Subunit Biogenesis	0.0315065	0.18552	0.321776	-1.41335	96	GO:0042274	BP
Ribosome Assembly	0.0143146	0.106215	0.38073	-1.53731	58	GO:0042255	BP
Ribosome Biogenesis	0.00225903	0.0259026	0.431708	-1.41216	290	GO:0042254	BP
Rig I Signaling Pathway	0.0130651	0.100215	0.38073	1.77792	24	GO:0039529	BP
Rna Splicing	0.000209284	0.00401271	0.518848	-1.45619	400	GO:0008380	BP
Rna Splicing Via Transesterification Reactions	0.00455949	0.0450088	0.407018	-1.402	266	GO:0000375	BP
Rrna Metabolic Process	0.00891375	0.0751086	0.38073	-1.33866	227	GO:0016072	BP
Rrna Processing	0.00149338	0.0187617	0.45506	-1.5051	195	GO:0006364	BP
Ruffle Organization	0.00235131	0.0268281	0.431708	1.85746	50	GO:0031529	BP
Sequestering Of Calcium Ion	6.53176e-05	0.00156224	0.538434	2.02535	108	GO:0051208	BP
Serine Family Amino Acid Catabolic Process	0.017694	0.125536	0.352488	-1.59999	10	GO:0009070	BP
Serotonin Transport	0.0324222	0.188821	0.321776	1.64398	22	GO:0006837	BP
Sex Differentiation	0.0277598	0.169778	0.352488	1.39908	246	GO:0007548	BP
Skeletal Muscle Cell Differentiation	0.00748774	0.0658845	0.407018	-1.56551	73	GO:0035914	BP
Skin Development	0.0275599	0.169125	0.352488	1.39686	239	GO:0043588	BP
Small Gtpase Mediated Signal Transduction	3.07483e-05	0.00082949	0.557332	1.70941	402	GO:0007264	BP
Small Molecule Biosynthetic Process	0.0328342	0.190122	0.321776	1.31021	469	GO:0044283	BP
Small Molecule Catabolic Process	0.000382158	0.00645587	0.498493	-1.53056	276	GO:0044282	BP
Smooth Muscle Cell Differentiation	0.000315644	0.0055198	0.498493	1.98893	76	GO:0051145	BP
Snare Complex Assembly	0.00320704	0.0344992	0.431708	-1.79418	16	GO:0035493	BP
Sno S Rna Metabolic Process	0.0294634	0.177294	0.352488	-1.57878	18	GO:0016074	BP
Spleen Development	0.00305403	0.0333167	0.431708	1.84821	39	GO:0048536	BP
Substrate Dependent Cell Migration	0.0042865	0.0429885	0.407018	1.81502	29	GO:0006929	BP
Superoxide Anion Generation	1.15544e-05	0.00036554	0.593325	2.31105	31	GO:0042554	BP
Superoxide Metabolic Process	0.00019486	0.00379914	0.518848	2.07605	52	GO:0006801	BP
Symbiont Entry Into Host	0.0249777	0.158962	0.352488	1.57034	65	GO:0044409	BP
Synapse Pruning	2.06701e-05	0.000601942	0.57561	2.21707	17	GO:0098883	BP
Synaptic Vesicle Lumen Acidification	0.0117731	0.0921716	0.38073	-1.68622	18	GO:0097401	BP
Synaptic Vesicle Maturation	0.0206524	0.139554	0.352488	-1.57664	27	GO:0016188	BP
Syncytium Formation	0.0039543	0.0404428	0.407018	1.78812	50	GO:0006949	BP
T Cell Activation	7.6548e-20	4.09826e-17	1.15122	2.47268	433	GO:0042110	BP
T Cell Activation Involved In Immune Response	1.19287e-07	6.1958e-06	0.690132	2.4269	87	GO:0002286	BP
T Cell Activation Via T Cell Receptor Contact With Antigen Bound To Mhc Molecule On Antigen Presenting Cell	0.0129883	0.0998882	0.38073	1.78317	11	GO:0002291	BP
T Cell Antigen Processing And Presentation	0.000501963	0.00790714	0.477271	1.83931	6	GO:0002457	BP
T Cell Chemotaxis	0.00773848	0.0678335	0.407018	1.79571	16	GO:0010818	BP
T Cell Cytokine Production	0.00759418	0.0666526	0.407018	1.73871	34	GO:0002369	BP
T Cell Differentiation	8.35213e-07	3.54456e-05	0.659444	2.04391	258	GO:0030217	BP
T Cell Differentiation In Thymus	0.000314036	0.00551942	0.498493	1.91838	83	GO:0033077	BP
T Cell Differentiation Involved In Immune Response	0.000200829	0.00388269	0.518848	2.09974	63	GO:0002292	BP
T Cell Extravasation	0.00500167	0.0483632	0.407018	1.83644	9	GO:0072683	BP
T Cell Lineage Commitment	0.0255045	0.160157	0.352488	1.59278	23	GO:0002360	BP
T Cell Mediated Cytotoxicity	0.00880207	0.0743476	0.38073	1.78584	32	GO:0001913	BP
T Cell Mediated Immunity	2.86909e-06	0.000109719	0.627257	2.18297	92	GO:0002456	BP
T Cell Migration	2.53157e-06	9.84342e-05	0.627257	2.30802	52	GO:0072678	BP
T Cell Proliferation	6.61871e-13	8.85889e-11	0.921426	2.58485	172	GO:0042098	BP
T Cell Receptor Signaling Pathway	2.7321e-05	0.000758713	0.57561	2.13411	95	GO:0050852	BP
T Cell Selection	0.00117092	0.0154942	0.45506	1.92786	42	GO:0045058	BP
T Helper 1 Cell Differentiation	0.0084254	0.0716488	0.38073	1.82571	19	GO:0045063	BP
T Helper 1 Type Immune Response	5.32856e-05	0.00131049	0.557332	2.27628	37	GO:0042088	BP
T Helper 17 Cell Differentiation	0.000610219	0.00919291	0.477271	2.06524	24	GO:0072539	BP
T Helper 17 Type Immune Response	0.00115014	0.015285	0.45506	2.02684	36	GO:0072538	BP
T Helper 2 Cell Differentiation	0.00582618	0.0545528	0.407018	1.84219	15	GO:0045064	BP
T Helper Cell Lineage Commitment	0.0327757	0.190122	0.321776	1.62694	14	GO:0002295	BP
Taxis	3.01953e-14	5.25399e-12	0.965328	2.39906	338	GO:0042330	BP
Telencephalon Regionalization	0.000458879	0.00739306	0.498493	-1.963	14	GO:0021978	BP
Temperature Homeostasis	0.0151224	0.110417	0.38073	1.52214	160	GO:0001659	BP
Tetrapyrrole Metabolic Process	0.0217454	0.143742	0.352488	-1.55328	48	GO:0033013	BP
Thrombin Activated Receptor Signaling Pathway	0.00368914	0.0382658	0.431708	1.79885	10	GO:0070493	BP
Thymic T Cell Selection	0.00126366	0.0164087	0.45506	1.98412	20	GO:0045061	BP
Tissue Homeostasis	2.04466e-05	0.000597933	0.57561	1.87554	240	GO:0001894	BP
Tissue Remodeling	0.000276644	0.00505365	0.498493	1.83918	169	GO:0048771	BP
Tolerance Induction	0.00010847	0.00238698	0.538434	2.09865	16	GO:0002507	BP
Toll Like Receptor 2 Signaling Pathway	0.000483251	0.00768773	0.498493	2.00308	16	GO:0034134	BP
Toll Like Receptor 3 Signaling Pathway	0.00111154	0.014849	0.45506	2.02035	25	GO:0034138	BP
Toll Like Receptor 7 Signaling Pathway	0.000283693	0.00512365	0.498493	1.96118	8	GO:0034154	BP
Toll Like Receptor 9 Signaling Pathway	0.00109835	0.014701	0.45506	1.94695	16	GO:0034162	BP
Toll Like Receptor Signaling Pathway	2.498e-07	1.20736e-05	0.674963	2.45233	62	GO:0002224	BP
Toll Signaling Pathway	0.0208372	0.140666	0.352488	1.69995	12	GO:0008063	BP
Translation At Synapse	7.36312e-05	0.00171396	0.538434	-2.05012	35	GO:0140241	BP
Tricarboxylic Acid Cycle	0.0163534	0.117825	0.352488	-1.66006	29	GO:0006099	BP
Triglyceride Biosynthetic Process	0.00136671	0.0174934	0.45506	1.96193	39	GO:0019432	BP
Triglyceride Catabolic Process	0.0095976	0.0796178	0.38073	1.7838	17	GO:0019433	BP
Triglyceride Metabolic Process	8.53701e-05	0.0019167	0.538434	2.0602	84	GO:0006641	BP
Trna 5 End Processing	0.00488091	0.0476453	0.407018	-1.76809	16	GO:0099116	BP
Trna 5 Leader Removal	0.0142864	0.106119	0.38073	-1.73233	13	GO:0001682	BP
Trna Metabolic Process	0.00535901	0.0506776	0.407018	-1.47422	174	GO:0006399	BP
Trna Modification	0.0263472	0.164316	0.352488	-1.48116	86	GO:0006400	BP
Trna Processing	0.000299612	0.00536066	0.498493	-1.74597	120	GO:0008033	BP
Trophoblast Cell Migration	0.00379759	0.0391573	0.431708	1.94841	18	GO:0061450	BP
Tumor Necrosis Factor Mediated Signaling Pathway	0.00434789	0.0431073	0.407018	1.79377	80	GO:0033209	BP
Tumor Necrosis Factor Superfamily Cytokine Production	1.26234e-16	2.92863e-14	1.04763	2.74902	155	GO:0071706	BP
Type B Pancreatic Cell Development	0.0199582	0.136052	0.352488	-1.62587	20	GO:0003323	BP
Type B Pancreatic Cell Differentiation	0.0151223	0.110417	0.38073	-1.67416	24	GO:0003309	BP
Type I Interferon Production	1.97962e-06	7.87325e-05	0.627257	2.18474	124	GO:0032606	BP
Type Ii Interferon Mediated Signaling Pathway	0.0111132	0.0889058	0.38073	1.78044	15	GO:0060333	BP
Type Ii Interferon Production	4.52555e-07	2.05868e-05	0.674963	2.30403	85	GO:0032609	BP
U4 Snrna 3 End Processing	0.0203617	0.137857	0.352488	-1.54641	8	GO:0034475	BP
Ubiquitin Dependent Protein Catabolic Process Via The Multivesicular Body Sorting Pathway	0.013817	0.103662	0.38073	-1.59238	31	GO:0043162	BP
Unsaturated Fatty Acid Biosynthetic Process	0.00123261	0.0161259	0.45506	2.00065	53	GO:0006636	BP
Unsaturated Fatty Acid Metabolic Process	0.0047473	0.0466025	0.407018	1.66872	83	GO:0033559	BP
Ureter Morphogenesis	0.0314615	0.185413	0.321776	-1.60532	7	GO:0072197	BP
Vacuolar Localization	0.00217428	0.0251379	0.431708	1.85222	73	GO:1990849	BP
Vascular Associated Smooth Muscle Cell Differentiation	6.58225e-05	0.00156892	0.538434	2.0987	38	GO:0035886	BP
Vascular Endothelial Cell Proliferation	0.0251175	0.15936	0.352488	1.61491	28	GO:0101023	BP
Vascular Endothelial Growth Factor Production	0.00117561	0.015526	0.45506	2.11309	27	GO:0010573	BP
Vesicle Coating	0.00484987	0.0474088	0.407018	-1.79404	29	GO:0006901	BP
Vesicle Organization	0.00357905	0.0375719	0.431708	-1.34711	341	GO:0016050	BP
Vesicle Targeting Rough Er To Cis Golgi	0.00607317	0.056284	0.407018	-1.74322	16	GO:0048207	BP
Vesicle Tethering Involved In Exocytosis	0.0145335	0.107346	0.38073	1.67621	8	GO:0090522	BP
Vestibulocochlear Nerve Morphogenesis	0.0201455	0.136793	0.352488	1.63013	5	GO:0021648	BP
Viral Gene Expression	0.0112478	0.0895704	0.38073	-1.53177	70	GO:0019080	BP
Viral Life Cycle	0.0294207	0.177294	0.352488	1.42481	183	GO:0019058	BP
Viral Release From Host Cell	0.00283932	0.0313087	0.431708	-1.77477	23	GO:0019076	BP
Vitamin D Metabolic Process	0.00234141	0.0267738	0.431708	1.83938	8	GO:0042359	BP
Water Transport	0.00409456	0.0415496	0.407018	-1.75826	14	GO:0006833	BP
Wound Healing	3.10801e-05	0.000835203	0.557332	1.72364	321	GO:0042060	BP
Wound Healing Involved In Inflammatory Response	0.0195879	0.134372	0.352488	1.69935	9	GO:0002246	BP
Zymogen Activation	0.019184	0.132694	0.352488	1.67719	27	GO:0031638	BP
Actin Cytoskeleton	0.0001	0.003798	0.538434	1.62923	471	GO:0015629	CC
Actin Filament	0.004039	0.055622	0.407018	1.72608	115	GO:0005884	CC
Actomyosin	0.01978	0.17556	0.352488	1.63941	103	GO:0042641	CC
Apical Part Of Cell	0.002802	0.04317	0.431708	1.54284	415	GO:0045177	CC
Apical Plasma Membrane	0.00173	0.03024	0.45506	1.54828	340	GO:0016324	CC
Atpase Dependent Transmembrane Transport Complex	0.007807	0.093378	0.407018	-1.77596	33	GO:0098533	CC
Basal Part Of Cell	0.002972	0.044292	0.431708	1.60662	277	GO:0045178	CC
Canonical Inflammasome Complex	0.002568	0.040246	0.431708	1.91562	14	GO:0061702	CC
Caveola	0.008547	0.095343	0.38073	1.67928	101	GO:0005901	CC
Cell Cell Junction	0.000463	0.011069	0.498493	1.58752	475	GO:0005911	CC
Cell Cortex	0.009291	0.099363	0.38073	1.52689	309	GO:0005938	CC
Cell Leading Edge	0.001562	0.027844	0.45506	1.51928	440	GO:0031252	CC
Cell Projection Membrane	0.003044	0.044624	0.431708	1.50393	330	GO:0031253	CC
Cell Substrate Junction	0.000241	0.007558	0.518848	1.8968	200	GO:0030055	CC
Cell Trailing Edge	0.00343	0.049497	0.431708	1.88556	14	GO:0031254	CC
Ciliary Base	0.019893	0.17556	0.352488	-1.55317	44	GO:0097546	CC
Ciliary Transition Zone	0.014043	0.134367	0.38073	-1.50671	70	GO:0035869	CC
Clathrin Coated Vesicle Membrane	0.000885	0.017109	0.477271	-1.74804	70	GO:0030665	CC
Coated Vesicle Membrane	0.008706	0.095343	0.38073	-1.44566	116	GO:0030662	CC
Cortical Actin Cytoskeleton	0.00533	0.068238	0.407018	1.79212	82	GO:0030864	CC
Cortical Cytoskeleton	0.002559	0.040246	0.431708	1.83671	105	GO:0030863	CC
Cytochrome Complex	0.000686	0.014686	0.477271	-1.93381	27	GO:0070069	CC
Cytoplasmic Side Of Membrane	0.007939	0.093723	0.38073	1.5802	186	GO:0098562	CC
Cytoplasmic Side Of Plasma Membrane	0.008435	0.095343	0.38073	1.60707	149	GO:0009898	CC
Cytosolic Large Ribosomal Subunit	0.002148	0.036154	0.431708	-1.81432	38	GO:0022625	CC
Early Endosome	0.000392	0.00991	0.498493	1.59502	388	GO:0005769	CC
Early Endosome Membrane	0.020496	0.175844	0.352488	1.47363	163	GO:0031901	CC
Early Phagosome	0.004668	0.0624	0.407018	1.99646	15	GO:0032009	CC
Endocytic Vesicle	1.15e-06	8.68e-05	0.643552	2.14194	200	GO:0030139	CC
Endocytic Vesicle Membrane	0.00869	0.095343	0.38073	1.85841	66	GO:0030666	CC
Exocytic Vesicle	0.000117	0.004259	0.538434	-1.56805	286	GO:0070382	CC
External Side Of Plasma Membrane	3.14e-23	2.85e-20	1.24623	2.86651	244	GO:0009897	CC
Extrinsic Component Of Organelle Membrane	0.013526	0.13221	0.38073	-1.5866	41	GO:0031312	CC
Extrinsic Component Of Postsynaptic Membrane	0.015227	0.142694	0.38073	1.69715	24	GO:0098890	CC
Extrinsic Component Of Presynaptic Membrane	0.021566	0.183214	0.352488	1.6783	18	GO:0098888	CC
Hemidesmosome	0.022533	0.189654	0.352488	1.7026	9	GO:0030056	CC
Immunological Synapse	4e-05	0.001733	0.557332	2.34433	40	GO:0001772	CC
Inner Mitochondrial Membrane Protein Complex	0.003633	0.0508	0.431708	-1.77733	40	GO:0098800	CC
Integrin Complex	2.09e-05	0.001087	0.57561	2.32526	29	GO:0008305	CC
Iron Sulfur Cluster Assembly Complex	0.012846	0.126929	0.38073	-1.66797	17	GO:1990229	CC
Lamellipodium	0.000571	0.013185	0.477271	1.81678	198	GO:0030027	CC
Lamellipodium Membrane	0.000388	0.00991	0.498493	2.04471	22	GO:0031258	CC
Large Ribosomal Subunit	8.47e-09	9.63e-07	0.74774	-2.2964	92	GO:0015934	CC
Leading Edge Membrane	0.006548	0.080699	0.407018	1.60251	194	GO:0031256	CC
Lytic Vacuole	0.000302	0.008858	0.498493	1.60366	465	GO:0000323	CC
Membrane Microdomain	5.79e-07	4.78e-05	0.659444	2.00647	292	GO:0098857	CC
Microvillus	0.010556	0.109937	0.38073	1.71183	84	GO:0005902	CC
Mitochondrial Large Ribosomal Subunit	6.32e-06	0.000411	0.610527	-2.14489	52	GO:0005762	CC
Mitochondrial Matrix	6e-11	9.09e-09	0.839089	-1.99141	354	GO:0005759	CC
Mitochondrial Protein Containing Complex	6.27e-14	1.9e-11	0.954542	-2.42223	158	GO:0098798	CC
Mitochondrial Small Ribosomal Subunit	1.08e-05	0.000656	0.593325	-2.18281	27	GO:0005763	CC
Multimeric Ribonuclease P Complex	0.001254	0.023265	0.45506	-1.86536	10	GO:0030681	CC
Multivesicular Body Internal Vesicle	0.003521	0.050011	0.431708	-1.72098	6	GO:0097487	CC
Multivesicular Body Membrane	0.012741	0.126929	0.38073	-1.67604	26	GO:0032585	CC
Myelin Sheath	1.29e-07	1.3e-05	0.690132	-1.95943	197	GO:0043209	CC
Nadh Dehydrogenase Complex	3.89e-05	0.001733	0.557332	-2.07516	42	GO:0030964	CC
Nadph Oxidase Complex	4.95e-06	0.000346	0.610527	1.98651	6	GO:0043020	CC
Nucleosome	0.016789	0.154158	0.352488	-1.58783	46	GO:0000786	CC
Organellar Ribosome	3.1e-10	4.02e-08	0.814036	-2.46075	79	GO:0000313	CC
Oxidoreductase Complex	0.004771	0.062855	0.407018	-1.49869	117	GO:1990204	CC
Phagocytic Vesicle	1.66e-05	0.000943	0.57561	2.1939	111	GO:0045335	CC
Phagocytic Vesicle Membrane	0.008967	0.09704	0.38073	1.90427	46	GO:0030670	CC
Phosphatidylinositol 3 Kinase Complex	0.008607	0.095343	0.38073	1.90505	15	GO:0005942	CC
Phosphatidylinositol 3 Kinase Complex Class I	0.001531	0.027836	0.45506	1.93718	9	GO:0097651	CC
Photoreceptor Connecting Cilium	0.020505	0.175844	0.352488	-1.5479	42	GO:0032391	CC
Plasma Membrane Protein Complex	0.000151	0.005265	0.518848	1.698	455	GO:0098797	CC
Plasma Membrane Raft	0.000358	0.009563	0.498493	1.9593	125	GO:0044853	CC
Plasma Membrane Signaling Receptor Complex	0.000167	0.005631	0.518848	1.95042	151	GO:0098802	CC
Podosome	0.006658	0.080699	0.407018	1.97257	47	GO:0002102	CC
Preribosome	0.010924	0.11157	0.38073	-1.47642	97	GO:0030684	CC
Proteasome Accessory Complex	0.000869	0.017109	0.477271	-1.94976	24	GO:0022624	CC
Proteasome Regulatory Particle Base Subcomplex	0.01599	0.148313	0.352488	-1.70882	12	GO:0008540	CC
Protein Complex Involved In Cell Adhesion	0.00058	0.013185	0.477271	2.1753	49	GO:0098636	CC
Protein Folding Chaperone Complex	0.000197	0.006407	0.518848	-2.06075	33	GO:0101031	CC
Protein Phosphatase Type 2a Complex	0.009584	0.101305	0.38073	-1.7423	14	GO:0000159	CC
Proton Transporting Atp Synthase Complex	0.000347	0.009563	0.498493	-1.95146	17	GO:0045259	CC
Proton Transporting Two Sector Atpase Complex	2.15e-05	0.001087	0.57561	-2.14003	39	GO:0016469	CC
Proton Transporting Two Sector Atpase Complex Proton Transporting Domain	0.000695	0.014686	0.477271	-1.92264	8	GO:0033177	CC
Proton Transporting V Type Atpase Complex	0.000355	0.009563	0.498493	-1.96565	22	GO:0033176	CC
Receptor Complex	4.68e-05	0.001934	0.557332	1.80436	323	GO:0043235	CC
Respiratory Chain Complex	7.21e-12	1.31e-09	0.887075	-2.51662	89	GO:0098803	CC
Respiratory Chain Complex Iv	0.000262	0.007935	0.498493	-1.97033	17	GO:0045277	CC
Ribonuclease Mrp Complex	0.022849	0.190545	0.352488	-1.70471	9	GO:0000172	CC
Ribonuclease P Complex	0.00101	0.019125	0.45506	-1.89528	13	GO:0030677	CC
Ribosomal Subunit	3.36e-13	7.64e-11	0.932595	-2.39737	148	GO:0044391	CC
Ribosome	2.66e-07	2.42e-05	0.674963	-1.93134	192	GO:0005840	CC
Rpap3 R2tp Prefoldin Like Complex	0.018207	0.165502	0.352488	-1.65139	10	GO:1990062	CC
Ruffle	0.004238	0.057502	0.407018	1.689	184	GO:0001726	CC
Ruffle Membrane	0.008251	0.095343	0.38073	1.75549	98	GO:0032587	CC
Scar Complex	0.020152	0.175844	0.352488	1.74557	12	GO:0031209	CC
Side Of Membrane	5.83e-19	2.65e-16	1.12391	2.40851	493	GO:0098552	CC
Sm Like Protein Family Complex	0.000803	0.016594	0.477271	-1.76722	76	GO:0120114	CC
Small Nuclear Ribonucleoprotein Complex	0.005513	0.0696	0.407018	-1.62553	64	GO:0030532	CC
Small Ribosomal Subunit	6.61e-05	0.002611	0.538434	-1.97121	60	GO:0015935	CC
Snare Complex	0.002248	0.037148	0.431708	-1.77427	44	GO:0031201	CC
Sno S Rna Containing Ribonucleoprotein Complex	0.005054	0.065625	0.407018	-1.71448	22	GO:0005732	CC
Sperm Fibrous Sheath	0.012382	0.125057	0.38073	-1.65613	7	GO:0035686	CC
Sperm Plasma Membrane	0.000826	0.016681	0.477271	-1.91021	8	GO:0097524	CC
Spliceosomal Complex	0.018391	0.165522	0.352488	-1.3567	185	GO:0005681	CC
Synaptic Vesicle Membrane	0.000453	0.011069	0.498493	-1.56689	161	GO:0030672	CC
Synaptobrevin 2 Snap 25 Syntaxin 1a Complex	0.001821	0.031233	0.45506	-1.74259	5	GO:0070044	CC
Transcription Factor Ap 1 Complex	0.002354	0.038202	0.431708	-1.74451	6	GO:0035976	CC
Transport Vesicle Membrane	0.006598	0.080699	0.407018	-1.38613	229	GO:0030658	CC
Transporter Complex	2.91e-05	0.001392	0.57561	-1.54515	402	GO:1990351	CC
Troponin Complex	0.002867	0.043431	0.431708	-1.72269	5	GO:0005861	CC
U2 Type Spliceosomal Complex	0.015023	0.142248	0.38073	-1.48609	90	GO:0005684	CC
Ubiquitin Ligase Complex	0.010643	0.109937	0.38073	-1.3359	299	GO:0000151	CC
Vacuolar Proton Transporting V Type Atpase V0 Domain	0.000695	0.014686	0.477271	-1.92264	8	GO:0000220	CC
Zona Pellucida Receptor Complex	0.013834	0.133776	0.38073	-1.67932	10	GO:0002199	CC
1 Phosphatidylinositol 3 Kinase Activity	0.002789	0.06234	0.431708	1.91889	14	GO:0016303	MF
1 Phosphatidylinositol 4 5 Bisphosphate 3 Kinase Activity	0.00383887	0.0750281	0.431708	1.78144	7	GO:0046934	MF
1 Phosphatidylinositol 4 Phosphate 3 Kinase Activity	0.00273643	0.06234	0.431708	1.80404	7	GO:0035005	MF
Actin Binding	0.000698941	0.0278877	0.477271	1.617	385	GO:0003779	MF
Actin Filament Binding	0.0034406	0.0717194	0.431708	1.62055	197	GO:0051015	MF
Active Monoatomic Ion Transmembrane Transporter Activity	0.000751368	0.0288879	0.477271	-1.76473	65	GO:0022853	MF
Atp Dependent Chromatin Remodeler Activity	0.00798102	0.111104	0.38073	1.81291	20	GO:0140658	MF
Atp Dependent Protein Binding	0.0131149	0.149736	0.38073	-1.61482	11	GO:0043008	MF
Atp Dependent Protein Folding Chaperone	0.0172625	0.172299	0.352488	-1.56944	27	GO:0140662	MF
Atpase Coupled Intramembrane Lipid Transporter Activity	0.0151599	0.15933	0.38073	1.66815	23	GO:0140326	MF
Atpase Coupled Ion Transmembrane Transporter Activity	0.000229579	0.015841	0.518848	-1.97496	16	GO:0042625	MF
Atpase Coupled Monoatomic Cation Transmembrane Transporter Activity	0.0112709	0.137591	0.38073	-1.53466	48	GO:0019829	MF
Bile Acid Sodium Symporter Activity	0.0104458	0.133007	0.38073	1.75514	5	GO:0008508	MF
C C Chemokine Binding	0.00108247	0.0358806	0.45506	2.11637	13	GO:0019957	MF
C X3 C Chemokine Binding	0.0115291	0.139669	0.38073	1.73998	5	GO:0019960	MF
Calcium Dependent Phospholipase A2 Activity	0.0020191	0.0511124	0.431708	1.83733	8	GO:0047498	MF
Calcium Ion Binding	0.0047462	0.0847133	0.407018	1.43681	453	GO:0005509	MF
Carbohydrate Binding	0.00225775	0.0541269	0.431708	1.6567	181	GO:0030246	MF
Card Domain Binding	0.0161527	0.165062	0.352488	1.7483	11	GO:0050700	MF
Cargo Receptor Activity	0.00197904	0.0511124	0.431708	1.7944	55	GO:0038024	MF
Ccr Chemokine Receptor Binding	0.0135974	0.153304	0.38073	1.7716	14	GO:0048020	MF
Cell Adhesion Molecule Binding	5.95918e-08	1.5762e-05	0.719513	2.09816	266	GO:0050839	MF
Chemokine Activity	8.06811e-05	0.00711338	0.538434	2.063	11	GO:0008009	MF
Chemokine Binding	0.000295514	0.0173696	0.498493	2.23984	22	GO:0019956	MF
Chemokine Receptor Binding	0.000702903	0.0278877	0.477271	2.14348	23	GO:0042379	MF
Complement Binding	0.00201963	0.0511124	0.431708	1.94213	14	GO:0001848	MF
Core Promoter Sequence Specific Dna Binding	0.0203871	0.191446	0.352488	-1.47907	42	GO:0001046	MF
Coreceptor Activity	0.00296913	0.064548	0.431708	1.85921	31	GO:0015026	MF
Cxcr Chemokine Receptor Binding	0.00119376	0.0386632	0.45506	1.80783	6	GO:0045236	MF
Cysteine Type Endopeptidase Activity	0.00404193	0.0772836	0.407018	1.65712	80	GO:0004197	MF
Cysteine Type Endopeptidase Regulator Activity Involved In Apoptotic Process	0.00995876	0.132811	0.38073	1.72188	31	GO:0043028	MF
Cysteine Type Peptidase Activity	0.0146278	0.155213	0.38073	1.58379	153	GO:0008234	MF
Cytokine Activity	0.000608454	0.0260977	0.477271	1.93417	101	GO:0005125	MF
Cytokine Binding	3.12433e-08	9.91663e-06	0.719513	2.42462	100	GO:0019955	MF
Cytokine Receptor Activity	3.03603e-09	1.20455e-06	0.774939	2.54494	57	GO:0004896	MF
Cytokine Receptor Binding	1.54322e-07	3.4987e-05	0.690132	2.23778	162	GO:0005126	MF
Deacetylase Activity	0.00720337	0.105849	0.407018	-1.66905	38	GO:0019213	MF
Deacylase Activity	0.000676361	0.0278877	0.477271	-1.82675	63	GO:0160215	MF
Death Receptor Activity	0.00509624	0.0879102	0.407018	1.86205	9	GO:0005035	MF
Deubiquitinase Activator Activity	0.0193404	0.182697	0.352488	1.62629	7	GO:0035800	MF
Endopeptidase Activity	0.00217935	0.0532096	0.431708	1.53724	329	GO:0004175	MF
Endopeptidase Regulator Activity	0.00108085	0.0358806	0.45506	1.86826	90	GO:0061135	MF
Ephrin Receptor Binding	0.0144656	0.155213	0.38073	1.66939	31	GO:0046875	MF
Epoxide Hydrolase Activity	0.0106439	0.133007	0.38073	-1.60916	5	GO:0004301	MF
Fatty Acid Binding	0.00638668	0.100353	0.407018	-1.67311	31	GO:0005504	MF
Fibroblast Growth Factor Binding	0.0141012	0.154672	0.38073	1.72781	25	GO:0017134	MF
Flippase Activity	0.0185839	0.178412	0.352488	1.73113	14	GO:0140327	MF
G Protein Coupled Adenosine Receptor Activity	0.00435032	0.0802785	0.407018	1.79567	5	GO:0001609	MF
G Protein Coupled Purinergic Nucleotide Receptor Activity	3.79732e-06	0.000463565	0.627257	2.14511	9	GO:0045028	MF
G Protein Coupled Receptor Activity	0.00010471	0.00874607	0.538434	1.81282	254	GO:0004930	MF
G Protein Coupled Receptor Binding	0.000542393	0.0239105	0.477271	1.75835	209	GO:0001664	MF
Gamma Aminobutyric Acid Sodium Chloride Symporter Activity	0.0137241	0.153382	0.38073	1.65352	6	GO:0015495	MF
Gamma Catenin Binding	0.0187799	0.178466	0.352488	1.62562	10	GO:0045295	MF
Gdp Binding	0.00670255	0.101304	0.407018	1.5098	278	GO:0019003	MF
Glycerophospholipid Flippase Activity	0.0130416	0.149736	0.38073	1.65576	12	GO:0140333	MF
Glycosaminoglycan Binding	0.00835509	0.114306	0.38073	1.57987	159	GO:0005539	MF
Growth Factor Binding	0.00202904	0.0511124	0.431708	1.72932	128	GO:0019838	MF
Growth Factor Receptor Binding	0.000845019	0.0311871	0.477271	1.85057	111	GO:0070851	MF
Gtpase Activator Activity	0.000205243	0.0148055	0.518848	1.81139	224	GO:0005096	MF
Gtpase Binding	0.020595	0.19226	0.352488	1.36919	316	GO:0051020	MF
Guanyl Nucleotide Exchange Factor Activity	0.000403094	0.0200488	0.498493	1.77864	197	GO:0005085	MF
Heparin Binding	0.0141024	0.154672	0.38073	1.53506	110	GO:0008201	MF
Histone Deacetylase Activity Hydrolytic Mechanism	0.012406	0.144536	0.38073	-1.62114	11	GO:0141221	MF
Histone H3k Deacetylase Activity	0.00161633	0.0466383	0.45506	-1.83509	16	GO:0141050	MF
Histone H4k12 Deacetylase Activity Hydrolytic Mechanism	0.00796528	0.111104	0.38073	-1.71397	10	GO:0140937	MF
Histone Kinase Activity	0.0100694	0.133007	0.38073	1.48735	224	GO:0035173	MF
Histone Modifying Activity	0.000487236	0.0227425	0.498493	1.52554	497	GO:0140993	MF
Hydrolase Activity Acting On Glycosyl Bonds	0.00428278	0.079962	0.407018	1.76315	97	GO:0016798	MF
Hydrolase Activity Hydrolyzing N Glycosyl Compounds	0.00542576	0.0905332	0.407018	1.93797	32	GO:0016799	MF
Immune Receptor Activity	1.86979e-12	1.48368e-09	0.898671	2.72951	66	GO:0140375	MF
Immunoglobulin Binding	0.00147965	0.044621	0.45506	1.88778	10	GO:0019865	MF
Immunoglobulin Receptor Binding	0.012274	0.144288	0.38073	1.67794	8	GO:0034987	MF
Insulin Receptor Binding	0.0118633	0.141398	0.38073	1.82253	22	GO:0005158	MF
Integrin Binding	7.65567e-07	0.000134995	0.659444	2.25562	133	GO:0005178	MF
Interleukin 1 Receptor Binding	0.00134327	0.0426353	0.45506	1.95973	12	GO:0005149	MF
K63 Linked Polyubiquitin Modification Dependent Protein Binding	0.0162618	0.165062	0.352488	1.69044	25	GO:0070530	MF
L Ascorbic Acid Binding	0.0143586	0.155213	0.38073	-1.57639	17	GO:0031418	MF
Lipase Activity	0.00529511	0.0902815	0.407018	1.67447	112	GO:0016298	MF
Lipid Kinase Activity	0.0108284	0.134255	0.38073	1.71594	40	GO:0001727	MF
Lipopeptide Binding	0.000389265	0.0200488	0.498493	1.88209	5	GO:0071723	MF
Lipopolysaccharide Binding	0.0074629	0.107669	0.407018	1.80598	23	GO:0001530	MF
Lipopolysaccharide Immune Receptor Activity	0.00193462	0.0511124	0.45506	1.82936	5	GO:0001875	MF
Long Chain Fatty Acid Binding	0.0105629	0.133007	0.38073	-1.62817	11	GO:0036041	MF
Low Density Lipoprotein Particle Receptor Activity	0.00445213	0.081213	0.407018	1.77432	8	GO:0005041	MF
Manganese Ion Transmembrane Transporter Activity	0.00358079	0.0719332	0.431708	1.885	9	GO:0005384	MF
Membrane Insertase Activity	0.0109297	0.134461	0.38073	-1.61356	17	GO:0032977	MF
Metal Cluster Binding	0.0136206	0.153304	0.38073	-1.44264	68	GO:0051540	MF
Mhc Protein Complex Binding	0.00106765	0.0358806	0.45506	1.87148	7	GO:0023023	MF
Microfibril Binding	0.0103125	0.133007	0.38073	1.67035	6	GO:0050436	MF
Modification Dependent Protein Binding	0.0179952	0.176843	0.352488	1.48646	162	GO:0140030	MF
Molecular Carrier Activity	0.00662309	0.101304	0.407018	-1.56655	83	GO:0140104	MF
Molecular Sequestering Activity	0.0164912	0.165642	0.352488	1.57353	59	GO:0140313	MF
Monocarboxylate Sodium Symporter Activity	0.00198239	0.0511124	0.431708	1.88337	12	GO:0005307	MF
N Acylsphingosine Amidohydrolase Activity	0.0163294	0.165062	0.352488	1.70835	5	GO:0017040	MF
Nad Binding	0.00358062	0.0719332	0.431708	-1.66289	56	GO:0051287	MF
Nad Dependent Protein Lysine Deacylase Activity	0.00475078	0.0847133	0.407018	-1.69159	7	GO:0141218	MF
Nadh Dehydrogenase Activity	0.00108523	0.0358806	0.45506	-1.89268	15	GO:0003954	MF
Nadh Dehydrogenase Ubiquinone Activity	0.00314129	0.067368	0.431708	-1.74318	11	GO:0008137	MF
Nadplus Nucleosidase Activity Cyclic Adp Ribose Generating	1.09427e-06	0.000157873	0.643552	2.24456	14	GO:0061809	MF
Non Membrane Spanning Protein Tyrosine Kinase Activity	0.00157191	0.0461967	0.45506	1.99865	35	GO:0004715	MF
Nucleoside Triphosphatase Regulator Activity	9.66921e-07	0.00015345	0.643552	1.85073	410	GO:0060589	MF
Nucleotide Receptor Activity	1.82705e-07	3.62441e-05	0.690132	2.28707	15	GO:0016502	MF
Opsonin Binding	0.00610929	0.0979337	0.407018	1.75054	12	GO:0001846	MF
Oxidoreductase Activity Acting On Ch Oh Group Of Donors	0.00664617	0.101304	0.407018	-1.50956	90	GO:0016614	MF
Oxidoreductase Activity Acting On Nad P H Oxygen As Acceptor	0.000244013	0.015973	0.518848	2.07879	14	GO:0050664	MF
Oxidoreductase Activity Acting On Nad P H Quinone Or Similar Compound As Acceptor	0.00104502	0.0358806	0.45506	-1.86725	22	GO:0016655	MF
P Type Potassium Transmembrane Transporter Activity	0.011823	0.141398	0.38073	-1.6804	8	GO:0008556	MF
Pattern Recognition Receptor Activity	2.36451e-09	1.20455e-06	0.774939	2.4683	27	GO:0038187	MF
Peptidase Activator Activity	0.00489081	0.0852936	0.407018	1.73739	52	GO:0016504	MF
Peptidase Regulator Activity	0.000334635	0.0186463	0.498493	1.91869	124	GO:0061134	MF
Peptide Antigen Binding	0.0183814	0.178412	0.352488	1.63571	7	GO:0042605	MF
Peptidyl Proline 4 Dioxygenase Activity	0.000764518	0.0288879	0.477271	-1.79288	7	GO:0031545	MF
Peptidyl Proline Dioxygenase Activity	0.02123	0.195884	0.352488	-1.56444	11	GO:0031543	MF
Phosphatase Binding	0.00213662	0.0529814	0.431708	1.62858	209	GO:0019902	MF
Phosphatidylcholine Floppase Activity	0.00547649	0.0905332	0.407018	1.75461	8	GO:0090554	MF
Phosphatidylinositol 3 4 Bisphosphate Binding	0.00288035	0.0634877	0.431708	2.00157	25	GO:1902936	MF
Phosphatidylinositol 3 Kinase Activator Activity	0.00420507	0.0794458	0.407018	1.72503	6	GO:0141038	MF
Phosphatidylinositol Binding	0.00278849	0.06234	0.431708	1.57823	262	GO:0035091	MF
Phosphatidylinositol Kinase Activity	0.00319722	0.0676532	0.431708	1.80432	26	GO:0052742	MF
Phosphatidylinositol Phosphate Binding	0.018052	0.176843	0.352488	1.45982	169	GO:1901981	MF
Phospholipase A2 Activity	0.0145187	0.155213	0.38073	1.70553	28	GO:0004623	MF
Phospholipase Activity	0.00785858	0.111104	0.38073	1.60812	96	GO:0004620	MF
Phospholipase Binding	0.0023708	0.0553302	0.431708	1.81117	24	GO:0043274	MF
Phospholipid Binding	0.000340733	0.0186463	0.498493	1.58208	425	GO:0005543	MF
Phosphoprotein Binding	0.000272872	0.0166557	0.498493	1.98362	100	GO:0051219	MF
Phosphorylation Dependent Protein Binding	0.00147034	0.044621	0.45506	1.92809	11	GO:0140031	MF
Phosphotyrosine Residue Binding	5.27433e-06	0.000597883	0.610527	2.24549	45	GO:0001784	MF
Porin Activity	0.0124773	0.144536	0.38073	-1.54798	6	GO:0015288	MF
Primary Active Transmembrane Transporter Activity	0.00715453	0.105849	0.407018	-1.45621	108	GO:0015399	MF
Primary Mirna Binding	0.0104431	0.133007	0.38073	1.7035	10	GO:0070878	MF
Proteasome Activating Activity	0.0159066	0.164992	0.352488	-1.53092	6	GO:0036402	MF
Protein Carrier Chaperone	0.00387669	0.0750281	0.431708	-1.74789	37	GO:0140597	MF
Protein Folding Chaperone	0.00821583	0.113379	0.38073	-1.57736	59	GO:0044183	MF
Protein Hormone Receptor Activity	0.0119391	0.141398	0.38073	1.60095	58	GO:0016500	MF
Protein Lysine Deacetylase Activity	0.00599866	0.0971415	0.407018	-1.71028	28	GO:0033558	MF
Protein Phosphatase Binding	0.00228513	0.0541269	0.431708	1.66514	168	GO:0019903	MF
Protein Phosphorylated Amino Acid Binding	4.75743e-05	0.00452498	0.557332	2.15847	59	GO:0045309	MF
Protein Sequestering Activity	0.00347977	0.0717194	0.431708	1.77956	38	GO:0140311	MF
Protein Serine Kinase Activity	0.014132	0.154672	0.38073	1.40109	324	GO:0106310	MF
Protein Tyrosine Kinase Activity	0.00199719	0.0511124	0.431708	1.77317	154	GO:0004713	MF
Protein Tyrosine Kinase Binding	0.00534748	0.0902815	0.407018	1.63814	108	GO:1990782	MF
Protein Tyrosine Phosphatase Activity	0.0106426	0.133007	0.38073	1.62646	90	GO:0004725	MF
Proton Transmembrane Transporter Activity	0.00557373	0.0911908	0.407018	-1.4786	107	GO:0015078	MF
Regulatory Rna Binding	0.0176095	0.174664	0.352488	1.67878	42	GO:0061980	MF
Ribonuclease P Activity	0.00191287	0.0511124	0.45506	-1.78414	11	GO:0004526	MF
Selenium Binding	0.0155492	0.162346	0.38073	-1.57362	7	GO:0008430	MF
Sh2 Domain Binding	0.00652931	0.101304	0.407018	1.86198	39	GO:0042169	MF
Sh3 Domain Binding	3.35682e-06	0.00044394	0.627257	2.24364	114	GO:0017124	MF
Sialic Acid Binding	0.00050311	0.0228124	0.477271	2.02437	9	GO:0033691	MF
Signaling Adaptor Activity	0.00149018	0.044621	0.45506	1.83241	108	GO:0035591	MF
Signaling Receptor Regulator Activity	0.000251623	0.015973	0.498493	1.71307	298	GO:0030545	MF
Sirna Binding	0.0186618	0.178412	0.352488	1.72541	11	GO:0035197	MF
Snap Receptor Activity	0.00700771	0.104917	0.407018	-1.70138	32	GO:0005484	MF
Structural Constituent Of Chromatin	0.0146704	0.155213	0.38073	-1.68527	13	GO:0030527	MF
Structural Constituent Of Postsynaptic Density	0.0211709	0.195884	0.352488	1.70004	11	GO:0098919	MF
Structural Constituent Of Ribosome	1.20574e-13	1.91351e-10	0.943632	-2.5237	124	GO:0003735	MF
Sulfate Binding	0.0185452	0.178412	0.352488	1.63496	6	GO:0043199	MF
Sulfurtransferase Activity	0.0162926	0.165062	0.352488	-1.63223	10	GO:0016783	MF
Superoxide Generating Nad P H Oxidase Activity	4.84718e-05	0.00452498	0.557332	2.01724	8	GO:0016175	MF
Superoxide Generating Nadph Oxidase Activator Activity	0.000404261	0.0200488	0.498493	1.85504	6	GO:0016176	MF
Superoxide Generating Nadph Oxidase Activity	0.000194231	0.0146783	0.518848	1.95492	7	GO:0106292	MF
Thiolester Hydrolase Activity	0.00778274	0.111104	0.407018	-1.61024	40	GO:0016790	MF
Toll Like Receptor Binding	0.000166894	0.013243	0.518848	2.03374	11	GO:0035325	MF
Transforming Growth Factor Beta Receptor Binding	0.00626565	0.0994359	0.407018	1.84621	23	GO:0005160	MF
Transmembrane Receptor Protein Phosphatase Activity	0.0090531	0.122797	0.38073	1.76442	5	GO:0019198	MF
Tumor Necrosis Factor Binding	0.0074456	0.107669	0.407018	1.68961	6	GO:0043120	MF
Tumor Necrosis Factor Receptor Activity	0.0096721	0.130081	0.38073	1.75914	5	GO:0005031	MF
Type I Transforming Growth Factor Beta Receptor Binding	0.0104485	0.133007	0.38073	1.69163	12	GO:0034713	MF
Type Ii Transforming Growth Factor Beta Receptor Binding	0.00480522	0.084732	0.407018	1.77761	10	GO:0005114	MF
Ubiquitin Like Protein Conjugating Enzyme Activity	2.76708e-05	0.00292757	0.57561	-2.0763	33	GO:0061650	MF
Unfolded Protein Binding	0.00379632	0.0750281	0.431708	-1.58937	76	GO:0051082	MF
Water Transmembrane Transporter Activity	0.000439923	0.0211563	0.498493	-1.82221	7	GO:0005372	MF

## Sheet: hippocampus_immune
pathway	pval	padj	log2err	NES	size
B Cell Adiponectin Response Dn	0.0379545	0.0634095	0.321776	-1.57449	5
B Cell Cd40l Response Up	4.98556e-05	0.000339702	0.557332	-1.71795	187
B Cell Egf Response Dn	7.62002e-06	8.27486e-05	0.610527	-2.21885	16
B Cell Ifna1 Response Dn	0.00630723	0.0140949	0.407018	1.64451	151
B Cell Ifna1 Response Up	0.0174029	0.0323396	0.352488	1.34384	465
B Cell Ifnb Response Dn	0.00364236	0.00874223	0.431708	1.76083	146
B Cell Ifnb Response Up	0.000185855	0.000916094	0.518848	1.66394	397
B Cell Ifne Response Dn	6.7712e-06	7.59029e-05	0.610527	-2.00036	6
B Cell Ifne Response Up	0.000622771	0.00219941	0.477271	2.0497	27
B Cell Ifng Response Up	2.61512e-05	0.000206535	0.57561	2.17188	98
B Cell Ifnk Response Up	1.68615e-05	0.000145446	0.57561	2.15685	62
B Cell Il12 Response Up	0.0118842	0.0238026	0.38073	1.70074	21
B Cell Il15 Response Up	2.10298e-07	5.62144e-06	0.690132	2.44034	85
B Cell Il17e Response Up	0.135189	0.182794	0.169571	-1.30179	17
B Cell Il18 Response Up	0.000231776	0.00107066	0.518848	2.16868	71
B Cell Il1a Response Dn	0.123667	0.171213	0.184706	-1.31288	25
B Cell Il1a Response Up	0.00053069	0.00193104	0.477271	2.01581	46
B Cell Il1b Response Up	0.000219629	0.00103136	0.518848	1.89935	6
B Cell Il2 Response Up	0.0237737	0.0418296	0.352488	1.69301	12
B Cell Il21 Response Up	0.003455	0.00854528	0.431708	-1.51648	170
B Cell Il27 Response Up	0.00127691	0.00392679	0.45506	1.87533	8
B Cell Il33 Response Up	0.0214368	0.0383449	0.352488	1.67341	17
B Cell Il36a Response Up	6.61583e-06	7.53771e-05	0.610527	2.27957	21
B Cell Il36ra Response Dn	0.000110495	0.00063179	0.538434	-1.9036	6
B Cell Il36ra Response Up	0.0352137	0.0595463	0.321776	1.60471	5
B Cell Il4 Response Dn	0.0214621	0.0383449	0.352488	1.61492	56
B Cell Il7 Response Dn	0.00684896	0.0149217	0.407018	-1.68035	6
B Cell Il7 Response Up	0.0886792	0.127867	0.206588	1.46621	24
B Cell Il9 Response Up	0.131115	0.179028	0.170932	-1.36493	6
B Cell Lta1 B2 Response Dn	0.00354216	0.00868492	0.431708	-1.81766	13
B Cell M Csf Response Up	0.135029	0.182794	0.168238	-1.35811	6
B Cell Tslp Response Up	0.0529412	0.0842529	0.276501	-1.47443	7
Cdc1 April Response Dn	0.0171609	0.0319755	0.352488	-1.69015	7
Cdc1 Baff Response Dn	0.0642808	0.0988388	0.287805	-1.49924	8
Cdc1 C5a Response Dn	0.000566788	0.0020305	0.477271	-1.94285	11
Cdc1 Cd27l Response Dn	0.0618778	0.0955669	0.321776	-1.50936	8
Cdc1 Cd30l Response Dn	0.000757225	0.00259247	0.477271	-1.88765	8
Cdc1 Egf Response Dn	0.00783585	0.0166542	0.38073	-1.78383	19
Cdc1 Fasl Response Dn	0.0194695	0.0357971	0.352488	-1.58919	6
Cdc1 Flt3l Response Dn	0.127983	0.175786	0.183024	-1.30941	34
Cdc1 Flt3l Response Up	0.0167435	0.0313659	0.352488	1.61059	104
Cdc1 Gm Csf Response Dn	0.00446764	0.0103618	0.407018	1.82753	78
Cdc1 Gm Csf Response Up	0.00750662	0.0161022	0.407018	1.47522	300
Cdc1 Ifna1 Response Dn	4.48148e-05	0.000319028	0.557332	1.7114	430
Cdc1 Ifna1 Response Up	3.38089e-09	1.67837e-07	0.774939	1.97597	464
Cdc1 Ifnb Response Dn	0.000370665	0.00148909	0.498493	1.8475	204
Cdc1 Ifnb Response Up	0.000407168	0.00161704	0.498493	1.64576	392
Cdc1 Ifng Response Dn	0.087344	0.126204	0.202072	1.42796	47
Cdc1 Ifng Response Up	0.00119613	0.00374464	0.45506	1.79773	168
Cdc1 Ifnk Response Up	0.0190516	0.0351216	0.352488	1.5644	119
Cdc1 Ifnl2 Response Dn	0.00335882	0.00836694	0.431708	1.79155	6
Cdc1 Il10 Response Up	0.000168079	0.000865293	0.518848	2.11538	79
Cdc1 Il11 Response Up	0.0436983	0.0719675	0.321776	1.68708	7
Cdc1 Il12 Response Dn	0.020872	0.0375803	0.352488	1.64825	6
Cdc1 Il12 Response Up	0.0040641	0.0095177	0.407018	1.74894	68
Cdc1 Il13 Response Dn	0.00753319	0.0161094	0.407018	1.79782	17
Cdc1 Il13 Response Up	0.0472313	0.077237	0.266351	1.48569	69
Cdc1 Il15 Response Dn	0.00821628	0.0174095	0.38073	1.57101	214
Cdc1 Il15 Response Up	4.82835e-13	5.64258e-11	0.921426	2.30374	348
Cdc1 Il18 Response Dn	0.00384219	0.00917638	0.431708	1.7568	129
Cdc1 Il18 Response Up	3.60085e-06	4.63443e-05	0.627257	1.91235	349
Cdc1 Il1a Response Dn	5.67596e-07	1.19539e-05	0.659444	2.0268	283
Cdc1 Il1a Response Up	2.19843e-12	1.90989e-10	0.898671	2.39405	290
Cdc1 Il1b Response Dn	0.00078526	0.0026365	0.477271	1.74205	235
Cdc1 Il1b Response Up	1.06505e-07	3.42215e-06	0.704976	2.17038	250
Cdc1 Il2 Response Dn	0.0913838	0.131223	0.24134	-1.26015	91
Cdc1 Il2 Response Up	3.53241e-10	2.45503e-08	0.814036	2.42917	177
Cdc1 Il27 Response Dn	0.0843137	0.122334	0.216543	-1.422	7
Cdc1 Il3 Response Dn	0.0164174	0.0310056	0.352488	1.67057	72
Cdc1 Il3 Response Up	0.0053108	0.0121017	0.407018	1.64332	171
Cdc1 Il33 Response Up	0.000206489	0.000989191	0.518848	2.0481	104
Cdc1 Il36a Response Dn	0.00153556	0.00454135	0.45506	1.8615	102
Cdc1 Il36a Response Up	2.73365e-05	0.000213471	0.57561	1.95219	234
Cdc1 Il7 Response Up	7.07295e-05	0.000442856	0.538434	2.19401	28
Cdc1 Lif Response Dn	0.138211	0.186157	0.169571	1.40355	7
Cdc1 Lta1 B2 Response Up	0.106212	0.148936	0.193813	1.44852	8
Cdc1 Noggin Response Dn	0.000472232	0.00179345	0.498493	-1.93266	15
Cdc1 Osm Response Dn	0.0565377	0.0893038	0.321776	-1.50103	20
Cdc1 Osm Response Up	0.0532319	0.0844662	0.271289	1.55872	20
Cdc1 Persephin Response Dn	0.0292968	0.0505243	0.352488	-1.60082	11
Cdc1 Scf Response Up	0.00923298	0.019098	0.38073	1.8247	18
Cdc1 Tl1a Response Dn	0.0116459	0.0234607	0.38073	-1.61711	36
Cdc1 Tl1a Response Up	0.10536	0.14823	0.186433	1.38978	35
Cdc1 Tnfa Response Dn	1.94005e-08	8.9889e-07	0.733762	2.07729	336
Cdc1 Tnfa Response Up	4.31549e-08	1.66626e-06	0.719513	2.13519	269
Cdc2 Adiponectin Response Dn	0.00146564	0.0043962	0.45506	-1.74692	47
Cdc2 Adiponectin Response Up	5.41452e-08	1.98057e-06	0.719513	2.47241	36
Cdc2 April Response Dn	0.0131829	0.025955	0.38073	-1.66845	5
Cdc2 Baff Response Dn	0.000171727	0.000877573	0.518848	-2.03038	30
Cdc2 Baff Response Up	0.00645875	0.0143413	0.407018	1.81689	10
Cdc2 Cardiotrophin 1 Response Dn	0.0581614	0.0910409	0.257206	1.5348	25
Cdc2 Cardiotrophin 1 Response Up	0.0012383	0.00384204	0.45506	1.9132	56
Cdc2 Cd27l Response Dn	0.000237615	0.00108646	0.518848	-1.87159	6
Cdc2 Cd30l Response Dn	0.000665808	0.00232531	0.477271	-1.90907	15
Cdc2 Egf Response Dn	0.000134106	0.000728156	0.518848	-2.06711	14
Cdc2 Fasl Response Dn	0.00211484	0.00562547	0.431708	-1.89707	14
Cdc2 Flt3l Response Dn	0.0529763	0.0842529	0.321776	-1.58468	12
Cdc2 Gm Csf Response Dn	2.69061e-06	3.81627e-05	0.627257	2.29048	86
Cdc2 Gm Csf Response Up	0.00356876	0.00870277	0.431708	1.50993	352
Cdc2 Ifna1 Response Dn	0.000174696	0.000886229	0.518848	1.71804	381
Cdc2 Ifnb Response Dn	0.000335042	0.00140926	0.498493	1.77649	217
Cdc2 Ifne Response Up	4.1836e-05	0.000304123	0.557332	2.17671	58
Cdc2 Ifng Response Dn	3.82245e-06	4.83019e-05	0.610527	2.17323	130
Cdc2 Ifng Response Up	1.64465e-15	5.71514e-13	1.01754	2.33322	432
Cdc2 Ifnk Response Up	2.93521e-08	1.24448e-06	0.733762	2.50289	94
Cdc2 Ifnl2 Response Dn	6.29378e-06	7.2903e-05	0.610527	-2.18086	10
Cdc2 Ifnl2 Response Up	0.110694	0.154794	0.183024	1.40405	25
Cdc2 Il10 Response Dn	0.0104731	0.0214714	0.38073	1.60014	113
Cdc2 Il10 Response Up	7.85839e-07	1.44115e-05	0.659444	2.18951	164
Cdc2 Il12 Response Up	2.57903e-07	6.63862e-06	0.674963	2.38722	100
Cdc2 Il13 Response Dn	0.00195529	0.00537126	0.431708	1.86131	55
Cdc2 Il13 Response Up	4.20083e-05	0.000304123	0.557332	-1.64404	272
Cdc2 Il15 Response Dn	0.00323584	0.0081188	0.431708	1.639	224
Cdc2 Il15 Response Up	7.02552e-24	4.88274e-21	1.26274	2.58386	462
Cdc2 Il17b Response Dn	0.00207346	0.00554251	0.431708	-1.76166	6
Cdc2 Il17d Response Dn	0.000111813	0.00063179	0.538434	-1.99547	7
Cdc2 Il18 Response Dn	8.50204e-05	0.000505036	0.538434	1.89546	214
Cdc2 Il1a Response Up	5.04167e-07	1.09499e-05	0.659444	1.88151	433
Cdc2 Il1b Response Up	4.82631e-07	1.08203e-05	0.659444	1.95443	381
Cdc2 Il2 Response Dn	3.14151e-06	4.28108e-05	0.627257	1.99723	217
Cdc2 Il2 Response Up	7.51197e-11	5.80091e-09	0.839089	2.33824	257
Cdc2 Il27 Response Dn	4.02103e-05	0.0002973	0.557332	-2.13826	16
Cdc2 Il27 Response Up	0.00313706	0.00789947	0.431708	1.82488	65
Cdc2 Il3 Response Dn	0.00015754	0.000823237	0.518848	2.07127	103
Cdc2 Il3 Response Up	0.0199544	0.0363998	0.352488	1.44241	320
Cdc2 Il33 Response Up	0.00303524	0.00768828	0.431708	1.64549	182
Cdc2 Il36a Response Dn	1.17158e-06	1.85056e-05	0.643552	2.01077	285
Cdc2 Il36a Response Up	1.90161e-07	5.50675e-06	0.690132	1.94361	412
Cdc2 Il36ra Response Dn	0.00164951	0.00477672	0.45506	-1.83571	8
Cdc2 Il4 Response Up	0.00298737	0.00763316	0.431708	-1.50543	185
Cdc2 Il5 Response Dn	0.00539946	0.0122235	0.407018	-1.6996	6
Cdc2 Il7 Response Dn	0.0414873	0.0688154	0.321776	-1.4234	54
Cdc2 Il7 Response Up	1.30192e-07	3.93406e-06	0.690132	2.35631	118
Cdc2 Il9 Response Dn	0.0282526	0.0490889	0.352488	-1.60576	5
Cdc2 Leptin Response Up	0.0018611	0.0052156	0.45506	1.86286	13
Cdc2 Lif Response Dn	0.146667	0.196782	0.158514	1.35486	23
Cdc2 Lif Response Up	0.000927362	0.00304017	0.477271	1.96632	79
Cdc2 Lta1 B2 Response Dn	0.000428591	0.00166408	0.498493	-1.84738	5
Cdc2 M Csf Response Dn	0.0195338	0.0358206	0.352488	-1.58954	9
Cdc2 M Csf Response Up	0.00528678	0.0120865	0.407018	1.65661	197
Cdc2 Neuropoietin Response Dn	0.0230509	0.0408682	0.352488	-1.62565	11
Cdc2 Neuropoietin Response Up	0.0201343	0.0366319	0.352488	1.722	40
Cdc2 Noggin Response Dn	0.0576541	0.0906552	0.266351	-1.44722	8
Cdc2 Osm Response Dn	0.0672451	0.10249	0.257206	-1.41285	35
Cdc2 Osm Response Up	0.000731422	0.00252904	0.477271	2.03491	94
Cdc2 Resistin Response Dn	0.00148016	0.0043962	0.45506	-1.79751	5
Cdc2 Tl1a Response Dn	0.0696921	0.105525	0.216543	1.42044	85
Cdc2 Tl1a Response Up	0.00212268	0.00562547	0.431708	1.89829	84
Cdc2 Tnfa Response Dn	4.87129e-13	5.64258e-11	0.921426	2.33721	349
Cdc2 Tnfa Response Up	1.19432e-09	6.38504e-08	0.788187	2.02705	479
Cdc2 Tpo Response Dn	7.05056e-05	0.000442856	0.538434	-2.0865	10
Cdc2 Tslp Response Up	4.70007e-06	5.73079e-05	0.610527	2.26823	57
Etac Ifng Response Up	0.000157273	0.000823237	0.518848	1.97002	8
Etac Il15 Response Up	0.00193095	0.00534665	0.45506	2.02471	14
Ilc Ifna1 Response Up	0.0295531	0.05084	0.352488	1.6145	22
Ilc Ifnb Response Up	0.00344283	0.00854528	0.431708	1.93312	37
Ilc Ifng Response Up	0.012406	0.0246348	0.38073	1.78414	15
Ilc Il12 Response Up	0.0978474	0.139067	0.199915	-1.38223	5
Ilc Il15 Response Up	0.0105213	0.0215067	0.38073	1.7895	18
Ilc Il18 Response Up	0.0821643	0.120473	0.222056	1.49625	11
Ilc Il1a Response Up	0.0669078	0.1022	0.234393	1.50878	29
Ilc Il1b Response Dn	0.0358261	0.0601428	0.321776	1.60272	5
Ilc Tl1a Response Up	0.13189	0.179732	0.170932	1.38424	9
Langerhans Gm Csf Response Dn	0.00147945	0.0043962	0.45506	1.88821	58
Langerhans Gm Csf Response Up	7.51094e-06	8.27486e-05	0.610527	1.89955	302
Langerhans Ifna1 Response Up	0.00238986	0.00619758	0.431708	1.87506	43
Langerhans Ifng Response Up	0.000826021	0.00275929	0.477271	2.07519	76
Langerhans Il15 Response Up	0.00653342	0.014415	0.407018	1.81519	10
Langerhans Il18 Response Dn	0.0649606	0.0996637	0.248911	1.55722	9
Langerhans Il18 Response Up	0.000737099	0.00253606	0.477271	1.82847	133
Langerhans Il1a Response Dn	0.00660862	0.0144889	0.407018	1.85637	44
Langerhans Il1a Response Up	1.13426e-05	0.000115928	0.593325	2.13882	148
Langerhans Il1b Response Dn	0.00018338	0.000910353	0.518848	2.05932	92
Langerhans Il1b Response Up	1.40345e-05	0.000128342	0.593325	2.08693	152
Langerhans Il3 Response Up	0.00358514	0.00871214	0.431708	1.8411	46
Langerhans Il36a Response Dn	0.136179	0.183775	0.170932	1.40475	7
Langerhans Il36a Response Up	0.0185655	0.0343165	0.352488	1.72134	44
Langerhans Tnfa Response Dn	0.0515267	0.0827045	0.276501	1.5583	22
Langerhans Tnfa Response Up	0.00205539	0.00551542	0.431708	1.81396	118
Langerhans Tslp Response Dn	0.0529532	0.0842529	0.282013	1.59749	5
Langerhans Tslp Response Up	0.000207801	0.000989191	0.518848	2.0212	96
Macrophage Gm Csf Response Up	0.0138278	0.0268444	0.38073	1.66493	35
Macrophage Ifna1 Response Up	1.20714e-05	0.000116143	0.593325	2.01538	195
Macrophage Ifnb Response Up	0.00222902	0.00584593	0.431708	1.64886	239
Macrophage Ifne Response Up	0.0763359	0.113605	0.224966	1.47976	22
Macrophage Ifng Response Dn	0.000565177	0.0020305	0.477271	1.9145	52
Macrophage Ifng Response Up	0.000164602	0.000853722	0.518848	1.92527	162
Macrophage Ifnk Response Up	0.0307776	0.0525563	0.352488	1.64164	44
Macrophage Il12 Response Up	0.00913741	0.0190135	0.38073	1.81241	14
Macrophage Il15 Response Dn	0.106291	0.148936	0.202072	-1.36954	34
Macrophage Il15 Response Up	2.57287e-14	5.96049e-12	0.975995	2.3508	382
Macrophage Il18 Response Up	0.00300564	0.00765173	0.431708	1.81184	82
Macrophage Il1a Response Dn	0.0323604	0.054989	0.321776	1.61677	23
Macrophage Il1a Response Up	0.00104757	0.00340217	0.45506	1.84321	141
Macrophage Il1b Response Dn	0.0733453	0.110097	0.222056	1.44549	41
Macrophage Il1b Response Up	0.000279407	0.00122904	0.498493	1.97431	134
Macrophage Il2 Response Up	8.06418e-05	0.000483155	0.538434	2.25719	20
Macrophage Il3 Response Up	0.00197958	0.00541657	0.431708	1.95205	16
Macrophage Il31 Response Up	0.129741	0.177499	0.173748	1.39577	14
Macrophage Il33 Response Up	0.0778443	0.11511	0.227987	1.49662	14
Macrophage Il36a Response Dn	0.102767	0.144874	0.195789	-1.41447	10
Macrophage Il36a Response Up	0.0125259	0.024802	0.38073	1.59587	114
Macrophage Il36ra Response Up	0.0826613	0.120692	0.222056	1.49962	10
Macrophage Il5 Response Up	0.0528455	0.0842529	0.282013	1.59111	7
Macrophage Il7 Response Up	0.000187936	0.00091983	0.518848	2.01976	121
Macrophage Lif Response Up	7.34199e-05	0.000455597	0.538434	2.25129	76
Macrophage M Csf Response Up	0.0759259	0.113237	0.222056	1.46071	31
Macrophage Tnfa Response Dn	0.0948122	0.135307	0.193813	1.4177	43
Macrophage Tnfa Response Up	7.64871e-07	1.44115e-05	0.659444	2.25325	136
Mast Cell Adiponectin Response Up	0.126482	0.17407	0.175204	-1.36853	10
Mast Cell Ifna1 Response Up	0.000225464	0.00105166	0.518848	2.13684	81
Mast Cell Ifnb Response Up	0.000436912	0.00168697	0.498493	1.93953	52
Mast Cell Ifne Response Up	0.0178034	0.0329956	0.352488	1.65303	13
Mast Cell Ifng Response Up	0.0011635	0.00365898	0.45506	1.9523	22
Mast Cell Ifnk Response Up	0.0901804	0.129763	0.2114	1.48609	8
Mast Cell Il15 Response Up	0.00170744	0.00489747	0.45506	2.17067	26
Mast Cell Il18 Response Up	0.00188495	0.00526122	0.45506	1.90019	21
Mast Cell Il1a Response Up	0.0229358	0.0407683	0.352488	1.64973	11
Mast Cell Il1b Response Up	0.00404496	0.0095177	0.407018	1.80394	8
Mast Cell Il3 Response Up	0.0341824	0.0579433	0.321776	1.58113	34
Mast Cell Il36a Response Up	0.0988142	0.139869	0.199915	-1.4236	10
Mast Cell Tgf Beta 1 Response Up	0.0461429	0.0757165	0.321776	1.67786	7
Migdc April Response Dn	0.00453864	0.0104796	0.407018	-1.80748	7
Migdc Baff Response Dn	0.0040462	0.0095177	0.407018	-1.86329	12
Migdc Baff Response Up	0.0309716	0.052758	0.352488	1.57038	13
Migdc Gm Csf Response Dn	0.00159638	0.00466169	0.45506	1.8623	68
Migdc Gm Csf Response Up	2.45972e-05	0.000203513	0.57561	1.84534	322
Migdc Ifna1 Response Dn	0.0427632	0.0705948	0.282013	1.49253	86
Migdc Ifna1 Response Up	2.59339e-05	0.000206535	0.57561	1.86758	283
Migdc Ifnb Response Up	3.34854e-05	0.000252961	0.557332	1.93791	228
Migdc Ifng Response Up	0.000770005	0.0026233	0.477271	1.92195	122
Migdc Ifnk Response Up	0.0722892	0.108747	0.237794	1.50843	16
Migdc Il10 Response Dn	0.059946	0.0932047	0.321776	-1.47538	25
Migdc Il10 Response Up	0.0156776	0.0298518	0.352488	1.74821	14
Migdc Il13 Response Dn	0.0064993	0.0143854	0.407018	-1.76949	7
Migdc Il15 Response Up	0.000422674	0.00165033	0.498493	2.26387	26
Migdc Il18 Response Up	1.11903e-09	6.38504e-08	0.788187	2.47273	145
Migdc Il1a Response Dn	6.11544e-07	1.21435e-05	0.659444	2.07446	235
Migdc Il1a Response Up	1.49013e-05	0.000134499	0.593325	1.87225	302
Migdc Il1b Response Dn	5.96412e-07	1.21435e-05	0.659444	2.13338	206
Migdc Il1b Response Up	1.34629e-06	2.03407e-05	0.643552	2.13873	196
Migdc Il2 Response Up	0.0997963	0.140972	0.202072	1.47918	6
Migdc Il3 Response Dn	0.0220195	0.0392399	0.352488	-1.60827	21
Migdc Il3 Response Up	8.37543e-07	1.45523e-05	0.659444	2.23993	128
Migdc Il36a Response Dn	0.00406728	0.0095177	0.407018	1.89885	28
Migdc Il36a Response Up	8.83714e-06	9.30578e-05	0.593325	2.17047	131
Migdc Il7 Response Up	0.119919	0.166354	0.183024	1.4447	7
Migdc Lif Response Up	0.140281	0.188578	0.166934	1.36875	8
Migdc Tnfa Response Up	0.0113674	0.023033	0.38073	1.66559	132
Migdc Tslp Response Up	0.00190044	0.00528323	0.45506	1.95845	72
Monocyte Gm Csf Response Dn	0.000232619	0.00107066	0.518848	2.0452	48
Monocyte Gm Csf Response Up	0.0389635	0.0647837	0.321776	1.36332	342
Monocyte Ifna1 Response Dn	0.00171235	0.00489747	0.45506	1.95774	88
Monocyte Ifna1 Response Up	2.02004e-07	5.61571e-06	0.690132	2.09852	270
Monocyte Ifnb Response Dn	0.00179887	0.00508218	0.45506	1.86576	55
Monocyte Ifnb Response Up	0.000200353	0.000966983	0.518848	1.83664	195
Monocyte Ifng Response Dn	7.82499e-05	0.00047705	0.538434	2.03172	11
Monocyte Ifng Response Up	1.2198e-05	0.000116143	0.593325	2.26137	82
Monocyte Il10 Response Dn	0.016872	0.0315216	0.352488	1.73791	14
Monocyte Il12 Response Up	0.00113677	0.00359448	0.45506	1.91136	10
Monocyte Il13 Response Up	0.00354895	0.00868492	0.431708	1.87789	19
Monocyte Il15 Response Dn	0.048	0.078196	0.261664	1.46421	92
Monocyte Il15 Response Up	8.27512e-13	8.21601e-11	0.921426	2.58093	181
Monocyte Il18 Response Dn	0.00956639	0.0196705	0.38073	1.78304	25
Monocyte Il18 Response Up	0.0016413	0.00477282	0.45506	1.82093	154
Monocyte Il1a Response Dn	0.000321771	0.0013636	0.498493	2.01185	56
Monocyte Il1a Response Up	9.92495e-06	0.000102953	0.593325	2.22703	106
Monocyte Il1b Response Dn	6.1667e-06	7.26416e-05	0.610527	2.21562	116
Monocyte Il1b Response Up	4.94237e-05	0.000339702	0.557332	1.99671	179
Monocyte Il2 Response Dn	0.000214816	0.00101563	0.518848	-2.00917	13
Monocyte Il2 Response Up	0.00945108	0.0194911	0.38073	1.76993	9
Monocyte Il3 Response Dn	0.0480427	0.078196	0.276501	1.51291	38
Monocyte Il3 Response Up	0.0693548	0.105244	0.216543	1.35808	103
Monocyte Il33 Response Dn	0.00107267	0.0034514	0.45506	1.8955	13
Monocyte Il33 Response Up	0.000517322	0.00189395	0.477271	1.95923	61
Monocyte Il36a Response Dn	0.0211196	0.037928	0.352488	1.59486	100
Monocyte Il36a Response Up	9.42263e-08	3.27436e-06	0.704976	2.12262	217
Monocyte M Csf Response Dn	0.0208372	0.0375803	0.352488	1.67756	8
Monocyte M Csf Response Up	0.0386188	0.0643647	0.321776	1.49569	91
Monocyte Tnfa Response Dn	0.001382	0.00417604	0.45506	1.8867	66
Monocyte Tnfa Response Up	9.20813e-14	1.59991e-11	0.954542	2.65331	155
Neutrophil Ifna1 Response Up	0.000317985	0.00135582	0.498493	2.09026	32
Neutrophil Ifng Response Up	5.19127e-05	0.000350285	0.557332	2.13414	23
Neutrophil Il15 Response Up	1.16771e-05	0.000116143	0.593325	2.28501	28
Neutrophil Il18 Response Up	1.0692e-06	1.72812e-05	0.643552	2.37492	45
Neutrophil Il1a Response Dn	0.148064	0.198274	0.173748	-1.28249	39
Neutrophil Il1a Response Up	0.00113782	0.00359448	0.45506	2.00395	28
Neutrophil Il1b Response Dn	0.00238694	0.00619758	0.431708	1.82036	68
Neutrophil Il1b Response Up	0.00051777	0.00189395	0.477271	2.11368	25
Neutrophil Il36a Response Up	0.00664102	0.0145142	0.407018	1.82216	19
Neutrophil Tnfa Response Dn	0.0796813	0.117576	0.224966	-1.42869	13
Neutrophil Tnfa Response Up	3.04406e-08	1.24448e-06	0.719513	2.3935	23
Nk Cell April Response Dn	0.0236457	0.0417101	0.352488	-1.63562	8
Nk Cell Baff Response Dn	5.64061e-05	0.000367236	0.557332	-2.07423	11
Nk Cell Cd40l Response Up	0.057971	0.0909478	0.271289	-1.44209	15
Nk Cell Fasl Response Dn	0.00274943	0.00705111	0.431708	-1.87181	10
Nk Cell Flt3l Response Dn	2.2454e-05	0.000188018	0.57561	-1.91456	5
Nk Cell G Csf Response Up	0.0301334	0.0517104	0.352488	-1.55043	9
Nk Cell Ifna1 Response Dn	0.00202211	0.0054897	0.431708	1.71209	221
Nk Cell Ifna1 Response Up	1.7138e-05	0.000145446	0.57561	1.7363	449
Nk Cell Ifnb Response Dn	0.00364784	0.00874223	0.431708	1.7153	155
Nk Cell Ifnb Response Up	2.8622e-07	7.10439e-06	0.674963	1.96721	380
Nk Cell Ifne Response Up	0.00917403	0.0190327	0.38073	1.77594	17
Nk Cell Il12 Response Dn	0.0248215	0.0434533	0.352488	1.5511	117
Nk Cell Il15 Response Dn	0.00742257	0.0159712	0.407018	1.57313	275
Nk Cell Il17e Response Up	0.0678337	0.103161	0.257206	-1.4348	30
Nk Cell Il18 Response Dn	3.52387e-07	8.44513e-06	0.674963	2.00735	306
Nk Cell Il1a Response Up	0.00181274	0.00510062	0.45506	1.91041	45
Nk Cell Il1b Response Dn	0.0353896	0.0596985	0.321776	1.5175	97
Nk Cell Il1b Response Up	0.000687516	0.00238912	0.477271	2.06535	49
Nk Cell Il2 Response Dn	0.0747532	0.111728	0.193813	1.26127	301
Nk Cell Il27 Response Up	0.015798	0.0299989	0.352488	1.72645	37
Nk Cell Il3 Response Dn	0.0513157	0.0826654	0.321776	-1.57972	14
Nk Cell Il3 Response Up	0.112016	0.156328	0.190023	1.45129	5
Nk Cell Il30 Response Dn	1.3203e-05	0.000124001	0.593325	-1.98428	6
Nk Cell Il33 Response Up	0.0625917	0.096455	0.287805	-1.49161	22
Nk Cell Il36a Response Dn	0.0590631	0.0921234	0.266351	1.55698	5
Nk Cell Il36a Response Up	0.00304212	0.00768828	0.431708	1.87923	24
Nk Cell Il4 Response Up	7.98418e-07	1.44115e-05	0.659444	-1.72847	396
Nk Cell Neuropoietin Response Up	0.0513834	0.0826654	0.282013	-1.54877	10
Nk Cell Tnfa Response Up	0.000260591	0.00116542	0.498493	2.17196	70
Pdc Flt3l Response Up	0.0063866	0.0142266	0.407018	1.8708	15
Pdc Ifna1 Response Dn	0.00243343	0.00628713	0.431708	1.74042	151
Pdc Ifna1 Response Up	1.08327e-07	3.42215e-06	0.704976	1.97086	400
Pdc Ifnb Response Dn	0.0710744	0.107151	0.216543	1.39833	67
Pdc Ifnb Response Up	4.53901e-07	1.05154e-05	0.674963	2.01155	289
Pdc Ifne Response Up	0.00584941	0.0131564	0.407018	1.86621	37
Pdc Ifng Response Up	3.24535e-06	4.33754e-05	0.627257	2.33238	82
Pdc Ifnk Response Dn	0.0841683	0.122334	0.21925	1.49282	11
Pdc Ifnk Response Up	0.000345921	0.00141045	0.498493	2.01485	103
Pdc Ifnl2 Response Up	0.0773931	0.114932	0.231127	1.53003	6
Pdc Il10 Response Up	1.88256e-06	2.78378e-05	0.643552	2.30766	56
Pdc Il15 Response Up	3.9181e-06	4.86265e-05	0.610527	2.06126	223
Pdc Il17e Response Up	0.133858	0.182058	0.169571	1.37924	9
Pdc Il18 Response Up	8.21085e-06	8.77929e-05	0.593325	2.27432	74
Pdc Il1a Response Up	0.00363631	0.00874223	0.431708	1.76974	68
Pdc Il1b Response Up	0.000263267	0.00116542	0.498493	2.03563	92
Pdc Il2 Response Dn	0.00128498	0.0039342	0.45506	-1.94457	17
Pdc Il2 Response Up	0.000484031	0.00182827	0.498493	1.96541	55
Pdc Il27 Response Up	0.0302559	0.0517927	0.352488	1.72901	7
Pdc Il3 Response Up	0.0134111	0.0262555	0.38073	1.41123	387
Pdc Il36a Response Dn	0.036641	0.0613626	0.321776	1.47552	117
Pdc Il36a Response Up	1.09783e-09	6.38504e-08	0.788187	2.35994	207
Pdc Il7 Response Up	0.0115607	0.0233567	0.38073	1.74689	11
Pdc Lif Response Up	0.000127587	0.000703755	0.518848	2.2273	50
Pdc Tnfa Response Up	5.36126e-05	0.000358276	0.557332	2.11296	116
T Cell Cd4 Adiponectin Response Dn	4.84118e-05	0.000336462	0.557332	-1.94077	6
T Cell Cd4 Baff Response Dn	0.0356007	0.0599092	0.321776	-1.58215	5
T Cell Cd4 C5a Response Dn	0.0609091	0.0942802	0.321776	-1.52101	5
T Cell Cd4 Cardiotrophin 1 Response Dn	1.18364e-05	0.000116143	0.593325	-2.05278	9
T Cell Cd4 Cd30l Response Dn	1.37447e-05	0.000127367	0.593325	-1.98336	6
T Cell Cd4 Decorin Response Dn	0.0704501	0.106441	0.237794	-1.43261	5
T Cell Cd4 Egf Response Dn	0.00236193	0.00617121	0.431708	-1.75428	6
T Cell Cd4 Fasl Response Dn	0.00135723	0.0041191	0.45506	-1.87997	7
T Cell Cd4 Fgf Basic Response Dn	0.000287139	0.0012551	0.498493	-1.91726	9
T Cell Cd4 Ifna1 Response Dn	0.00402205	0.0095177	0.407018	1.59953	252
T Cell Cd4 Ifna1 Response Up	0.000257827	0.00116542	0.498493	1.78521	254
T Cell Cd4 Ifnb Response Dn	0.00364326	0.00874223	0.431708	1.66532	203
T Cell Cd4 Ifnb Response Up	0.000316718	0.00135582	0.498493	1.80944	227
T Cell Cd4 Ifne Response Up	0.126253	0.17407	0.176694	1.41196	11
T Cell Cd4 Ifng Response Up	0.000910785	0.00299998	0.477271	2.05001	81
T Cell Cd4 Ifnk Response Dn	0.00511958	0.0117429	0.407018	-1.79404	7
T Cell Cd4 Ifnk Response Up	0.00404448	0.0095177	0.407018	1.88148	49
T Cell Cd4 Il Y Response Dn	0.000313585	0.00135367	0.498493	-1.93999	8
T Cell Cd4 Il12 Response Up	0.00034703	0.00141045	0.498493	2.13957	25
T Cell Cd4 Il13 Response Dn	0.00122301	0.00381163	0.45506	-1.92313	10
T Cell Cd4 Il15 Response Up	0.000119008	0.000661687	0.538434	2.15168	84
T Cell Cd4 Il17a Response Dn	0.0089586	0.0186974	0.38073	-1.69882	5
T Cell Cd4 Il17c Response Dn	0.00019643	0.000954677	0.518848	-2.00881	11
T Cell Cd4 Il17d Response Dn	1.56222e-05	0.000139198	0.57561	-2.13517	11
T Cell Cd4 Il18 Response Up	4.69709e-05	0.000329745	0.557332	2.27893	76
T Cell Cd4 Il1a Response Dn	6.01326e-05	0.000386965	0.557332	2.05574	120
T Cell Cd4 Il1a Response Up	5.65385e-05	0.000367236	0.557332	2.08021	111
T Cell Cd4 Il1b Response Dn	1.71605e-05	0.000145446	0.57561	2.18113	103
T Cell Cd4 Il1b Response Up	0.00155494	0.00457916	0.45506	1.9124	100
T Cell Cd4 Il2 Response Dn	0.0156635	0.0298518	0.352488	-1.61402	6
T Cell Cd4 Il2 Response Up	1.23264e-06	1.90374e-05	0.643552	2.31238	67
T Cell Cd4 Il21 Response Dn	0.000829772	0.00275929	0.477271	-1.87982	8
T Cell Cd4 Il27 Response Dn	0.000340656	0.00140926	0.498493	-1.93659	8
T Cell Cd4 Il27 Response Up	0.00348563	0.00859048	0.431708	1.91956	20
T Cell Cd4 Il3 Response Dn	0.000340656	0.00140926	0.498493	-1.93659	8
T Cell Cd4 Il36a Response Dn	0.00265849	0.00684315	0.431708	1.77098	139
T Cell Cd4 Il36a Response Up	0.00477789	0.0109955	0.407018	1.53897	308
T Cell Cd4 Il36ra Response Dn	0.0107066	0.0217575	0.38073	-1.64775	6
T Cell Cd4 Il4 Response Up	0.000782947	0.0026365	0.477271	-1.61035	164
T Cell Cd4 Il7 Response Dn	0.0198583	0.0363198	0.352488	1.65352	70
T Cell Cd4 Il7 Response Up	0.0044531	0.0103618	0.407018	-1.40866	285
T Cell Cd4 Noggin Response Dn	3.64002e-05	0.000272023	0.557332	-2.02024	8
T Cell Cd4 Osm Response Dn	0.000603061	0.00214937	0.477271	-1.90819	8
T Cell Cd4 Resistin Response Dn	0.00124693	0.00385162	0.45506	-1.80149	6
T Cell Cd4 Scf Response Dn	0.000504356	0.00187448	0.477271	-1.84002	5
T Cell Cd4 Tgf Beta 1 Response Dn	0.00218163	0.00574332	0.431708	-1.7595	6
T Cell Cd4 Tl1a Response Dn	0.0246248	0.0432178	0.352488	-1.56132	15
T Cell Cd4 Tl1a Response Up	8.05891e-05	0.000483155	0.538434	2.0893	90
T Cell Cd4 Tnfa Response Dn	0.0824295	0.120607	0.231127	-1.38235	35
T Cell Cd4 Tnfa Response Up	0.000178438	0.000892188	0.518848	2.10096	85
T Cell Cd4 Tweak Response Dn	0.000415267	0.00163983	0.498493	-1.84761	6
T Cell Cd8 Baff Response Dn	0.00103366	0.00337273	0.45506	-1.89593	7
T Cell Cd8 C5a Response Dn	0.00014474	0.000767897	0.518848	-1.89388	6
T Cell Cd8 Egf Response Dn	0.0118719	0.0238026	0.38073	-1.67666	5
T Cell Cd8 Fgf Basic Response Dn	9.73017e-05	0.000569389	0.538434	-1.88503	5
T Cell Cd8 Ifna1 Response Dn	0.00086834	0.00287379	0.477271	1.73232	224
T Cell Cd8 Ifna1 Response Up	0.000784893	0.0026365	0.477271	1.63079	287
T Cell Cd8 Ifnb Response Dn	0.00112162	0.00357581	0.45506	1.84237	159
T Cell Cd8 Ifnb Response Up	0.000116557	0.000653281	0.538434	1.90572	236
T Cell Cd8 Ifne Response Dn	0.0165418	0.0310718	0.352488	-1.65441	5
T Cell Cd8 Ifne Response Up	0.00048963	0.00183942	0.477271	2.18995	30
T Cell Cd8 Ifng Response Up	9.24248e-07	1.56671e-05	0.659444	2.32626	61
T Cell Cd8 Ifnk Response Dn	0.00590678	0.0132426	0.407018	-1.72156	5
T Cell Cd8 Ifnk Response Up	0.000657684	0.00230854	0.477271	2.01168	59
T Cell Cd8 Il Y Response Dn	0.0165418	0.0310718	0.352488	-1.65441	5
T Cell Cd8 Il12 Response Up	0.00212877	0.00562547	0.431708	1.96356	34
T Cell Cd8 Il15 Response Dn	0.028518	0.0494264	0.352488	1.42627	165
T Cell Cd8 Il17a Response Dn	0.0089586	0.0186974	0.38073	-1.69842	5
T Cell Cd8 Il17d Response Dn	4.49852e-05	0.000319028	0.557332	-2.00923	9
T Cell Cd8 Il18 Response Dn	0.00696379	0.0151245	0.407018	1.6822	98
T Cell Cd8 Il18 Response Up	0.0740741	0.110951	0.195789	1.26795	262
T Cell Cd8 Il1a Response Dn	0.000451813	0.00172533	0.498493	1.92356	111
T Cell Cd8 Il1a Response Up	2.79507e-06	3.88515e-05	0.627257	2.18192	152
T Cell Cd8 Il1b Response Dn	0.00133011	0.00405451	0.45506	1.91963	82
T Cell Cd8 Il1b Response Up	0.000563901	0.0020305	0.477271	1.93374	112
T Cell Cd8 Il21 Response Dn	0.00194828	0.00537126	0.45506	-1.89609	10
T Cell Cd8 Il21 Response Up	0.0667831	0.1022	0.287805	-1.40148	49
T Cell Cd8 Il27 Response Up	0.00158643	0.0046522	0.45506	1.934	21
T Cell Cd8 Il36a Response Dn	0.0056309	0.0127061	0.407018	1.65153	163
T Cell Cd8 Il36a Response Up	0.117021	0.162986	0.147331	1.17957	398
T Cell Cd8 Il4 Response Dn	0.0422961	0.0699899	0.271289	1.44357	134
T Cell Cd8 Il4 Response Up	2.13071e-06	3.08509e-05	0.627257	-1.72711	341
T Cell Cd8 Il7 Response Up	9.622e-07	1.59221e-05	0.643552	-1.68052	393
T Cell Cd8 Noggin Response Dn	0.00014474	0.000767897	0.518848	-1.89386	6
T Cell Cd8 Osm Response Dn	0.00331532	0.00828829	0.431708	-1.78616	8
T Cell Cd8 Tl1a Response Up	0.00891833	0.0186974	0.38073	1.7879	24
T Cell Cd8 Tnfa Response Up	0.000497135	0.00185758	0.477271	1.9715	63
T Cell Cd8 Tslp Response Up	0.0775681	0.114946	0.234393	-1.41573	23
T Cell Gd April Response Dn	0.0011143	0.00356884	0.45506	-1.93233	10
T Cell Gd Baff Response Dn	0.0263169	0.0459553	0.352488	-1.60916	25
T Cell Gd C5a Response Dn	8.08703e-07	1.44115e-05	0.659444	-2.24738	10
T Cell Gd Decorin Response Dn	0.000419708	0.00164801	0.498493	-1.84685	6
T Cell Gd Egf Response Dn	0.0925197	0.13258	0.206588	-1.43306	12
T Cell Gd Fasl Response Dn	3.14842e-05	0.000240456	0.557332	-2.17864	19
T Cell Gd Ifna1 Response Dn	0.0608974	0.0942802	0.231127	1.37897	106
T Cell Gd Ifna1 Response Up	2.52441e-05	0.000206407	0.57561	1.94529	224
T Cell Gd Ifnb Response Dn	0.0143949	0.0277901	0.38073	1.58583	89
T Cell Gd Ifnb Response Up	3.13124e-05	0.000240456	0.557332	1.90655	247
T Cell Gd Ifne Response Dn	0.000447231	0.00171727	0.498493	-1.92659	7
T Cell Gd Ifne Response Up	0.0160971	0.0304836	0.352488	1.78903	29
T Cell Gd Ifng Response Dn	6.65174e-05	0.000424125	0.538434	-1.92736	6
T Cell Gd Ifng Response Up	0.00657504	0.0144609	0.407018	1.78202	85
T Cell Gd Ifnk Response Dn	0.0204424	0.0369985	0.352488	-1.58688	9
T Cell Gd Ifnk Response Up	0.0136376	0.0265495	0.38073	1.70718	49
T Cell Gd Il10 Response Dn	0.00148016	0.0043962	0.45506	-1.78637	6
T Cell Gd Il12 Response Up	0.00712164	0.0154191	0.407018	1.7672	78
T Cell Gd Il13 Response Dn	0.000132258	0.000723777	0.518848	-2.08358	12
T Cell Gd Il17a Response Dn	0.0020374	0.00550312	0.431708	-1.78431	5
T Cell Gd Il17e Response Dn	0.000353781	0.00142952	0.498493	-1.9389	7
T Cell Gd Il18 Response Up	0.0557717	0.0882946	0.216543	1.26015	430
T Cell Gd Il19 Response Dn	0.000344206	0.00141045	0.498493	-1.85683	6
T Cell Gd Il1a Response Dn	0.0134562	0.0262699	0.38073	1.50616	281
T Cell Gd Il1b Response Dn	0.0154509	0.0295824	0.38073	1.46525	284
T Cell Gd Il1b Response Up	0.027283	0.0475229	0.352488	1.31849	473
T Cell Gd Il1ra Response Dn	0.000262389	0.00116542	0.498493	-2.00399	10
T Cell Gd Il2 Response Dn	0.0150195	0.0288357	0.38073	-1.48014	87
T Cell Gd Il2 Response Up	0.0972973	0.138569	0.164406	1.20516	354
T Cell Gd Il21 Response Dn	1.21992e-05	0.000116143	0.593325	-2.15896	13
T Cell Gd Il21 Response Up	0.0814815	0.119724	0.213928	1.44459	31
T Cell Gd Il23 Response Dn	0.0292635	0.0505243	0.352488	-1.47508	51
T Cell Gd Il23 Response Up	0.00204288	0.00550312	0.431708	-1.38466	324
T Cell Gd Il27 Response Dn	1.68373e-05	0.000145446	0.57561	-2.18242	12
T Cell Gd Il27 Response Up	0.000103521	0.000599557	0.538434	2.14933	31
T Cell Gd Il3 Response Dn	9.74925e-05	0.000569389	0.538434	-2.00185	7
T Cell Gd Il30 Response Dn	3.59349e-06	4.63443e-05	0.627257	-2.09407	8
T Cell Gd Il36a Response Dn	0.124365	0.171837	0.202072	-1.21676	79
T Cell Gd Il36a Response Up	0.134752	0.182794	0.141225	1.17964	297
T Cell Gd Il36ra Response Dn	0.0133286	0.0261677	0.38073	-1.6303	6
T Cell Gd Il4 Response Dn	0.000136405	0.000734897	0.518848	-2.05173	20
T Cell Gd Il4 Response Up	0.0831099	0.121093	0.257206	-1.28426	113
T Cell Gd Il7 Response Dn	0.081448	0.119724	0.191892	1.33593	153
T Cell Gd Lif Response Dn	0.0508999	0.0822685	0.321776	-1.54421	5
T Cell Gd Noggin Response Dn	0.000339481	0.00140926	0.498493	-2.03736	22
T Cell Gd Osm Response Dn	0.000176577	0.000889282	0.518848	-2.02505	13
T Cell Gd Persephin Response Dn	0.0139112	0.0269312	0.38073	-1.6245	6
T Cell Gd Tgf Beta 1 Response Dn	0.00881293	0.0185606	0.38073	-1.69925	5
T Cell Gd Tl1a Response Dn	0.128866	0.176651	0.199915	-1.22121	70
T Cell Gd Tl1a Response Up	0.0122981	0.0244906	0.38073	1.55923	153
T Cell Gd Tnfa Response Dn	0.000259305	0.00116542	0.498493	-2.00574	28
T Cell Gd Tnfa Response Up	2.59867e-05	0.000206535	0.57561	2.18125	57
T Cell Gd Tpo Response Dn	5.54066e-06	6.63924e-05	0.610527	-2.08161	9
Treg Baff Response Dn	0.00174065	0.00493775	0.45506	-1.83099	8
Treg Ifna1 Response Up	0.000111222	0.00063179	0.538434	1.94855	179
Treg Ifnb Response Dn	0.00730854	0.0157746	0.407018	1.66525	68
Treg Ifnb Response Up	5.44927e-05	0.00036069	0.557332	1.94435	182
Treg Ifne Response Dn	0.00536036	0.0121747	0.407018	-1.73403	9
Treg Ifne Response Up	0.000305752	0.00132811	0.498493	2.11582	27
Treg Ifng Response Up	0.000517077	0.00189395	0.477271	1.92743	52
Treg Ifnk Response Dn	0.0461925	0.0757165	0.321776	-1.49403	6
Treg Ifnk Response Up	0.000623429	0.00219941	0.477271	1.94239	55
Treg Il Y Response Dn	0.0987546	0.139869	0.287805	-1.46447	5
Treg Il12 Response Up	0.00040038	0.00159922	0.498493	2.02214	24
Treg Il15 Response Up	0.0202616	0.0367671	0.352488	1.46238	209
Treg Il17e Response Up	0.0861057	0.124674	0.213928	-1.4047	5
Treg Il18 Response Dn	0.0570866	0.0899664	0.266351	-1.50458	12
Treg Il18 Response Up	0.00173205	0.00493351	0.45506	1.82124	127
Treg Il1a Response Dn	0.00169758	0.00489551	0.45506	1.8302	125
Treg Il1a Response Up	7.52211e-05	0.000462643	0.538434	2.00539	163
Treg Il1b Response Dn	0.00105612	0.00341398	0.45506	1.97093	84
Treg Il1b Response Up	0.00198776	0.00541761	0.431708	1.819	126
Treg Il1ra Response Dn	0.0485462	0.0788309	0.321776	-1.54918	5
Treg Il2 Response Dn	0.119298	0.165825	0.169571	1.33671	51
Treg Il2 Response Up	0.0234982	0.0415554	0.352488	1.423	314
Treg Il27 Response Up	0.0121331	0.0242313	0.38073	1.69621	13
Treg Il36a Response Dn	0.0149609	0.0288028	0.38073	1.75867	30
Treg Il36a Response Up	0.0107015	0.0217575	0.38073	1.51007	273
Treg Il7 Response Up	0.0499973	0.080998	0.321776	-1.39709	54
Treg Lta2 B1 Response Up	0.0939335	0.134329	0.204295	-1.40848	6
Treg Osm Response Dn	0.00837594	0.0176938	0.38073	-1.70221	5
Treg Osm Response Up	0.0126929	0.0250612	0.38073	1.78183	15
Treg Tl1a Response Dn	0.059118	0.0921234	0.321776	-1.56503	14
Treg Tl1a Response Up	0.00447271	0.0103618	0.407018	1.68379	140
Treg Tnfa Response Up	0.00761541	0.0162353	0.407018	1.62338	140

## Sheet: hippocampus_Hagenaeur_Brain
pathway	pval	padj	log2err	NES	size
"Gemma_GSE100236_RNA_sequencing_of_whole,_ventral_and_dorsal_hippocampus_after_different_stress_conditions_treatment_novelty.stress_Up"	0.0424837	0.139297	0.282013	1.44712	99
"Gemma_GSE100236_RNA_sequencing_of_whole,_ventral_and_dorsal_hippocampus_after_different_stress_conditions_treatment_restraint.stress_Up"	0.0219866	0.0891692	0.352488	1.52695	96
"Gemma_GSE100236_RNA_sequencing_of_whole,_ventral_and_dorsal_hippocampus_after_different_stress_conditions_treatment_swim.stress_Up"	0.0298686	0.106153	0.352488	1.50225	85
"Gemma_GSE139684_Transcriptional_profiling_of_astrocytes_in_the_prefrontal_cortex,_hippocampus,_accumbens_nucleus_and_caudate_putamen_of_a_Aldh1l1-TRAP_(JD130)_mouse_line_after_chronic_social_defeat_stress_treatment_Stress_Down"	6.5916e-05	0.00068354	0.538434	-2.11419	32
"Gemma_GSE139684_Transcriptional_profiling_of_astrocytes_in_the_prefrontal_cortex,_hippocampus,_accumbens_nucleus_and_caudate_putamen_of_a_Aldh1l1-TRAP_(JD130)_mouse_line_after_chronic_social_defeat_stress_treatment_Stress_Up"	0.0104161	0.0499052	0.38073	-1.37301	267
"Gemma_GSE139684_Transcriptional_profiling_of_astrocytes_in_the_prefrontal_cortex,_hippocampus,_accumbens_nucleus_and_caudate_putamen_of_a_Aldh1l1-TRAP_(JD130)_mouse_line_after_chronic_social_defeat_stress_treatment_non.fragile_Up"	1.11711e-06	1.56505e-05	0.643552	-1.70613	353
"Gemma_GSE151807_Expression_data_from_brain_parts_(amygdala,_hippocampus,_prefrontal_cortex,_and_cerebral_cortex)_from_mice_with_or_without_chronic_mild_stress_(CMS)_treatments._treatment_chronic.mild.stress_Down"	0.0673317	0.197558	0.276501	-1.32489	75
"Gemma_GSE8641_Rnf41_is_associated_with_anxiety_like_behavior,_major_depression_and_beta_carboline_induced_seizure_-_GPL339_StrainOrLine_A.J_Down"	0.0224852	0.0891692	0.352488	-1.57279	14
"Gemma_GSE8641_Rnf41_is_associated_with_anxiety_like_behavior,_major_depression_and_beta_carboline_induced_seizure_-_GPL340_StrainOrLine_A.J_Down"	0.0224852	0.0891692	0.352488	-1.57279	14
Andrus_2012_WistarMoreImmobileRats_Downregulated_HC	0.0275188	0.100153	0.352488	1.44563	174
BEIER_GLIOMA_STEM_CELL_DN	0.0282378	0.101791	0.352488	1.56136	56
BLALOCK_ALZHEIMERS_DISEASE_INCIPIENT_UP	0.00462939	0.0263492	0.407018	1.5012	311
Birt_Hagenauer_2020_BredLowRespondersToNovelty_Upregulated_HC	0.00304084	0.0182691	0.431708	1.83724	98
CHEBOTAEV_GR_TARGETS_UP	0.0403429	0.133945	0.321776	1.52552	64
COATES_MACROPHAGE_M1_VS_M2_DN	0.000366851	0.00322914	0.498493	1.98792	63
COATES_MACROPHAGE_M1_VS_M2_UP	0.0245196	0.0937443	0.352488	1.62589	75
Cembrowski_HippoSeq_ca4__VS__ca3_d-ca3_v-ca2-ca1_d-ca1_v	0.00263525	0.0163515	0.431708	-1.82496	23
Cembrowski_HippoSeq_dg_d-dg_v__VS__ca4-ca3_d-ca3_v-ca2-ca1_d-ca1_v	0.0649521	0.194816	0.287805	-1.48259	32
DESCARTES_FETAL_CEREBELLUM_MICROGLIA	1e-50	7.57e-49		3.70844	372
DESCARTES_FETAL_CEREBELLUM_OLIGODENDROCYTES	0.0658824	0.194816	0.271289	-1.3533	47
DESCARTES_FETAL_CEREBELLUM_VASCULAR_ENDOTHELIAL_CELLS	0.0341512	0.117511	0.321776	1.33228	410
DESCARTES_FETAL_CEREBRUM_MICROGLIA	1e-50	7.57e-49		3.56004	266
DESCARTES_FETAL_CEREBRUM_VASCULAR_ENDOTHELIAL_CELLS	0.00931723	0.045511	0.38073	1.44297	361
DESCARTES_FETAL_EYE_MICROGLIA	3.30448e-39	2.08458e-37	1.62807	3.39797	111
DESCARTES_FETAL_EYE_SKELETAL_MUSCLE_CELLS	0.0095124	0.0461595	0.38073	-1.5156	85
DESCARTES_MAIN_FETAL_ENS_GLIA	0.01099	0.0516735	0.38073	-1.50947	85
DESCARTES_MAIN_FETAL_ENS_NEURONS	0.0310724	0.108897	0.352488	-1.30645	194
DESCARTES_MAIN_FETAL_MICROGLIA	1e-50	7.57e-49		3.68469	435
DESCARTES_MAIN_FETAL_MYELOID_CELLS	1e-50	7.57e-49		3.4557	333
DESCARTES_MAIN_FETAL_VISCERAL_NEURONS	0.00119399	0.00894904	0.45506	-1.52007	219
DURANTE_ADULT_OLFACTORY_NEUROEPITHELIUM_B_CELLS	7.9543e-08	1.25446e-06	0.704976	2.41024	20
DURANTE_ADULT_OLFACTORY_NEUROEPITHELIUM_CD4_T_CELLS	2.50775e-07	3.79673e-06	0.674963	2.37616	16
DURANTE_ADULT_OLFACTORY_NEUROEPITHELIUM_CD8_T_CELLS	1.33073e-06	1.7673e-05	0.643552	2.46036	34
DURANTE_ADULT_OLFACTORY_NEUROEPITHELIUM_DENDRITIC_CELLS	8.97667e-21	4.24709e-19	1.17789	3.05686	86
DURANTE_ADULT_OLFACTORY_NEUROEPITHELIUM_GLOBOSE_BASAL_CELLS	0.00196315	0.01351	0.431708	-1.8255	30
DURANTE_ADULT_OLFACTORY_NEUROEPITHELIUM_IMMATURE_NEURONS	0.000373281	0.00324797	0.498493	-1.7436	119
DURANTE_ADULT_OLFACTORY_NEUROEPITHELIUM_MACROPHAGES	3.05177e-18	1.28344e-16	1.10534	2.95739	62
DURANTE_ADULT_OLFACTORY_NEUROEPITHELIUM_MAST_CELLS	0.000553024	0.00455043	0.477271	2.03094	60
DURANTE_ADULT_OLFACTORY_NEUROEPITHELIUM_MATURE_NEURONS	6.42852e-09	1.13172e-07	0.761461	-2.19219	148
DURANTE_ADULT_OLFACTORY_NEUROEPITHELIUM_MONOCYTES	1.88772e-06	2.42204e-05	0.643552	2.45906	26
DURANTE_ADULT_OLFACTORY_NEUROEPITHELIUM_NK_CELLS	3.7115e-11	8.78003e-10	0.851339	2.72784	43
DURANTE_ADULT_OLFACTORY_NEUROEPITHELIUM_PERICYTES	0.0417362	0.137966	0.287857	1.46312	66
DURANTE_ADULT_OLFACTORY_NEUROEPITHELIUM_RESPIRATORY_HORIZONTAL_BASAL_CELLS	0.0548105	0.170747	0.321776	-1.51162	18
DURANTE_ADULT_OLFACTORY_NEUROEPITHELIUM_SUSTENTACULAR_CELLS	0.00618458	0.0336815	0.407018	-1.72989	13
DURANTE_ADULT_OLFACTORY_NEUROEPITHELIUM_UNSPECIFIED	0.0213049	0.0886144	0.352488	-1.58255	21
DURANTE_ADULT_OLFACTORY_NEUROEPITHELIUM_VASCULAR_SMOOTH_MUSCLE_CELLS	0.0145756	0.0649041	0.38073	-1.52128	74
DropViz_HC_Astrocyte_Gja1_cluster-markers.csv	8.20561e-05	0.000839412	0.538434	-1.8375	119
DropViz_HC_Endothelial_Flt1_cluster-markers.csv	0.000144204	0.0013818	0.518848	1.90951	214
DropViz_HC_Microglia_Macrophage_C1qb_cluster-markers.csv	1e-50	7.57e-49		3.73425	194
DropViz_HC_Mural_Rgs5Acta2_cluster-markers.csv	0.00931863	0.045511	0.38073	1.54747	155
DropViz_HC_Neuron_Subiculum_Slc17a6_cluster-markers.csv	0.0386998	0.130203	0.321776	-1.49349	43
DropViz_HC_Oligodendrocyte_Tfr_cluster-markers.csv	0.00117745	0.0089133	0.45506	-1.71618	90
DropViz_HC_Polydendrocyte_Tnr_cluster-markers.csv	0.00221034	0.0146774	0.431708	-1.78506	54
DropViz_STR_Astrocyte_Gja1_cluster-markers.csv	5.58312e-05	0.000587003	0.557332	-1.83451	131
DropViz_STR_Endothelial_Flt1_cluster-markers.csv	0.000469952	0.00399724	0.498493	1.79921	210
DropViz_STR_Microglia_Macrophage_C1qb_cluster-markers.csv	1e-50	7.57e-49		3.68101	179
DropViz_STR_Mural_Rgs5Acta2_cluster-markers.csv	0.0585582	0.180282	0.321776	1.42624	175
DropViz_STR_Oligodendrocytes_Tfr_cluster-markers.csv	2.81741e-06	3.43997e-05	0.627257	-2.01715	119
DropViz_STR_Polydendrocytes_Tnr_cluster-markers.csv	0.00343508	0.0203153	0.431708	-1.60718	79
Endothelial_All_Darmanis_PNAS_2015	0.0157242	0.0688047	0.352488	1.67915	13
Endothelial_All_Zeisel_Science_2015	0.00151146	0.0106933	0.45506	1.62418	270
FAN_EMBRYONIC_CTX_BIG_GROUPS_BRAIN_ENDOTHELIAL	0.0304048	0.107553	0.352488	1.33864	318
FAN_EMBRYONIC_CTX_BIG_GROUPS_BRAIN_IMMUNE	1.73812e-12	5.26302e-11	0.91012	2.73005	107
FAN_EMBRYONIC_CTX_BIG_GROUPS_CAJAL_RETZIUS	3.11002e-11	7.59447e-10	0.851339	-1.97404	411
FAN_EMBRYONIC_CTX_BIG_GROUPS_GLIAL	2.11627e-09	4.00504e-08	0.774939	-2.32395	119
FAN_EMBRYONIC_CTX_BIG_GROUPS_MICROGLIA	1e-50	7.57e-49		3.32113	312
FAN_EMBRYONIC_CTX_BRAIN_B_CELL	3.14302e-06	3.7176e-05	0.627257	2.27939	63
FAN_EMBRYONIC_CTX_BRAIN_EFFECTOR_T_CELL	1.25873e-06	1.70153e-05	0.643552	2.44874	73
FAN_EMBRYONIC_CTX_BRAIN_MYELOID	5.90076e-11	1.3536e-09	0.839089	2.66247	101
FAN_EMBRYONIC_CTX_BRAIN_NAIVE_LIKE_T_CELL	0.000279072	0.00254527	0.498493	2.00534	100
FAN_EMBRYONIC_CTX_MICROGLIA_1	0.0168757	0.0729997	0.352488	1.56234	115
FAN_EMBRYONIC_CTX_MICROGLIA_3	1.68257e-06	2.19605e-05	0.643552	2.32298	17
FAN_EMBRYONIC_CTX_OPC	0.0132036	0.0605764	0.38073	-1.60563	49
FLORIO_NEOCORTEX_BASAL_RADIAL_GLIA_DN	0.00433873	0.0250719	0.407018	1.7847	142
FLORIO_NEOCORTEX_BASAL_RADIAL_GLIA_UP	0.00724746	0.0375776	0.407018	1.61058	198
Gandal_2018_AlcoholAbuseDisorder_Downregulated_Cortex	0.0224247	0.0891692	0.352488	-1.26814	211
Gandal_2018_AlcoholAbuseDisorder_Upregulated_Cortex	0.000136011	0.00133714	0.518848	-1.69542	203
Gandal_2018_AutismSpectrumDisorder_Downregulated_Cortex	2.1217e-17	8.45329e-16	1.07687	-2.15934	481
Gandal_2018_AutismSpectrumDisorder_Upregulated_Cortex	1.42653e-14	5.1423e-13	0.975995	2.34598	401
Gandal_2018_BipolarDisorder_Downregulated_Cortex	0.0158582	0.0689921	0.352488	-1.45014	154
Gandal_2018_BipolarDisorder_Downregulated_PFC	0.000437736	0.00376553	0.498493	-1.85294	87
Gandal_2018_Schizophrenia_Downregulated_PFC	2.87027e-08	4.72347e-07	0.733762	-1.75686	420
Gandal_2018_Schizophrenia_Upregulated_Cortex	0.000631637	0.00508669	0.477271	1.64795	372
Gandal_2018_Schizophrenia_Upregulated_PFC	1.38792e-08	2.33479e-07	0.74774	2.20145	252
Gemma_GSE10415_7_Brain_Regions_in_20_Inbred_Strains_of_Laboratory_Mice_StrainOrLine_129S1.SvImJ_Down	0.000561058	0.00456689	0.477271	-1.47197	373
Gemma_GSE10415_7_Brain_Regions_in_20_Inbred_Strains_of_Laboratory_Mice_StrainOrLine_A.J_Down	0.00268718	0.0165382	0.431708	-1.38304	396
Gemma_GSE10415_7_Brain_Regions_in_20_Inbred_Strains_of_Laboratory_Mice_StrainOrLine_AKR.J_Down	2.16339e-12	6.29878e-11	0.898671	-1.94847	483
Gemma_GSE10415_7_Brain_Regions_in_20_Inbred_Strains_of_Laboratory_Mice_StrainOrLine_BALB.cByJ_Down	0.0355032	0.121611	0.321776	-1.38063	104
Gemma_GSE10415_7_Brain_Regions_in_20_Inbred_Strains_of_Laboratory_Mice_StrainOrLine_C3H.HeJ_Down	5.69072e-08	9.1657e-07	0.719513	-1.77198	431
Gemma_GSE10415_7_Brain_Regions_in_20_Inbred_Strains_of_Laboratory_Mice_StrainOrLine_C57BL.6J_Down	0.00878481	0.0437507	0.38073	-1.31871	326
Gemma_GSE10415_7_Brain_Regions_in_20_Inbred_Strains_of_Laboratory_Mice_StrainOrLine_C57L.J_Down	0.0203321	0.0859853	0.352488	-1.33592	221
Gemma_GSE10415_7_Brain_Regions_in_20_Inbred_Strains_of_Laboratory_Mice_StrainOrLine_DBA.2J_Down	0.0129687	0.060229	0.38073	-1.30191	315
Gemma_GSE10415_7_Brain_Regions_in_20_Inbred_Strains_of_Laboratory_Mice_StrainOrLine_FVB.NJ_Down	0.0024181	0.0153824	0.431708	-1.43147	260
Gemma_GSE10415_7_Brain_Regions_in_20_Inbred_Strains_of_Laboratory_Mice_StrainOrLine_PERA.EiJ_Down	0.0268714	0.0986186	0.352488	-1.34166	208
Gemma_GSE10415_7_Brain_Regions_in_20_Inbred_Strains_of_Laboratory_Mice_StrainOrLine_PL.J_Down	0.0229668	0.0897674	0.352488	-1.33109	218
Gemma_GSE10415_7_Brain_Regions_in_20_Inbred_Strains_of_Laboratory_Mice_StrainOrLine_SJL.J_Down	0.0023487	0.0150675	0.431708	-1.41817	295
Gemma_GSE10415_7_Brain_Regions_in_20_Inbred_Strains_of_Laboratory_Mice_StrainOrLine_SPRET.EiJ_Down	0.0060815	0.0333601	0.407018	-1.29836	399
Gemma_GSE109315_Gene_expression_analysis_of_mouse_brain_regions_after_chronic_social_defeat_stress_(CSDS)_strain_C57BL.6Crl_Up	0.0484928	0.156876	0.234393	1.26742	462
Gemma_GSE117758_Cell-type_specific_transcriptional_profiling_of_glucocorticoid_receptor-dependent_changes_in_the_nucleus_accumbens_cell_type_treatment_astrocyte_Down	0.00330157	0.0196794	0.431708	1.88189	24
Gemma_GSE117758_Cell-type_specific_transcriptional_profiling_of_glucocorticoid_receptor-dependent_changes_in_the_nucleus_accumbens_cell_type_treatment_astrocyte_Up	0.0426909	0.139297	0.321776	1.57187	39
Gemma_GSE117758_Cell-type_specific_transcriptional_profiling_of_glucocorticoid_receptor-dependent_changes_in_the_nucleus_accumbens_cell_type_treatment_dexamethasone_Up	0.000190211	0.00175597	0.518848	2.21876	44
Gemma_GSE117758_Cell-type_specific_transcriptional_profiling_of_glucocorticoid_receptor-dependent_changes_in_the_nucleus_accumbens_cell_type_treatment_neuron_Down	0.000837393	0.0064798	0.477271	2.12395	30
Gemma_GSE117758_Cell-type_specific_transcriptional_profiling_of_glucocorticoid_receptor-dependent_changes_in_the_nucleus_accumbens_treatment_dexamethasone_Up	3.44637e-09	6.21168e-08	0.774939	2.5241	88
Gemma_GSE12284_Gene_expression_changes_in_LPS-induced_neuroinflammation_Treatment_lipopolysaccharide_Up	0.000156896	0.00148463	0.518848	2.11342	14
Gemma_GSE12457_Comparison_of_Environmental_and_Genetic_models_of_ADHD_treatment_Aroclor.1254_Aroclor.1260_Down	0.00623014	0.0336872	0.407018	1.58632	238
Gemma_GSE126678_Enduring_and_sex-specific_changes_in_hippocampal_gene_expression_after_subchronic_immune_challenge_treatment_Long.term.subchronic.immune.challenge.acute.immune.challenge_lipopolysaccharide_lipopolysaccharide_Down	0.0618762	0.187361	0.257206	-1.44249	11
Gemma_GSE126678_Enduring_and_sex-specific_changes_in_hippocampal_gene_expression_after_subchronic_immune_challenge_treatment_Long.term.subchronic.immune.challenge.acute.immune.challenge_lipopolysaccharide_lipopolysaccharide_Up	6.60399e-07	9.8024e-06	0.659444	2.44897	28
Gemma_GSE126678_Enduring_and_sex-specific_changes_in_hippocampal_gene_expression_after_subchronic_immune_challenge_treatment_lipopolysaccharide_Acute.immune.challenge._vehicle_Down	0.0618762	0.187361	0.257206	-1.44249	11
Gemma_GSE126678_Enduring_and_sex-specific_changes_in_hippocampal_gene_expression_after_subchronic_immune_challenge_treatment_lipopolysaccharide_Acute.immune.challenge._vehicle_Up	8.57004e-07	1.2476e-05	0.659444	2.45275	29
Gemma_GSE132930_Transcriptional_profiling_reveals_running_promotes_cerebrovascular_remodeling_in_young_but_not_midlife_mice_treatment_running_Down	0.00996339	0.04804	0.38073	1.76886	48
Gemma_GSE132930_Transcriptional_profiling_reveals_running_promotes_cerebrovascular_remodeling_in_young_but_not_midlife_mice_treatment_running_Up	0.0504684	0.161201	0.321776	-1.42858	41
Gemma_GSE14522_Effects_of_BDNF_in_Rodent_Models_of_Aging_and_Alzheimer's_Disease_Age_old_Up	0.0105363	0.0501634	0.38073	1.78794	15
Gemma_GSE149195_Sequencing_to_determine_the_effect_of_neuronal_IL-1b_receptor_knockout_on_the_stress_effect_of_paired_fighting_social_defeat_in_mice_treatment_Stress_Up	4.63111e-05	0.000493767	0.557332	2.20724	17
Gemma_GSE150712_Microglial_remodeling_of_the_extracellular_matrix_promotes_synapse_plasticity_[Microglia]_treatment_Il33.mouse.interleukin.33_Up	0.0585859	0.180282	0.266351	1.58329	9
Gemma_GSE16158_Gene_expression_induced_by_trace_fear_conditioning_in_murine_hippocampus_timepoint_0.5.h_Up	6.62357e-10	1.31949e-08	0.801216	-2.50724	18
Gemma_GSE16158_Gene_expression_induced_by_trace_fear_conditioning_in_murine_hippocampus_timepoint_2.h_Up	7.75086e-11	1.62983e-09	0.839089	-2.57517	17
Gemma_GSE16158_Gene_expression_induced_by_trace_fear_conditioning_in_murine_hippocampus_timepoint_6.h_Up	0.00640158	0.0343688	0.407018	-1.79944	10
Gemma_GSE20388_Expression_Profiling_of_a_Genetic_Animal_Model_of_Depression_StrainOrLine_diisopropyl.fluorophosphate_Flinders.sensitive.rat_Sprague.Dawley_sensitive.toward_Up	0.00735831	0.0375906	0.407018	-1.5117	119
Gemma_GSE23182_Systemic_inflammation_modulates_Fc_receptor_expression_on_microglia_in_chronic_neurodegeneration_Treatment_lipopolysaccharide_Up	1.01498e-14	3.8417e-13	0.986546	2.77865	152
Gemma_GSE23182_Systemic_inflammation_modulates_Fc_receptor_expression_on_microglia_in_chronic_neurodegeneration_disease_prion.disease_Down	0.00721217	0.0375776	0.407018	-1.36599	351
Gemma_GSE30187_Expression_data_in_the_mouse_brain_following_the_glucocorticoid_receptor_overexpression_in_the_forebrain_(GRov)_during_different_periods_in_development_genotype_Overexpression_Nr3c1.mouse.nuclear.receptor.subfamily.3.group.C.member.1_Down	0.0144129	0.0649041	0.38073	1.62118	132
Gemma_GSE30187_Expression_data_in_the_mouse_brain_following_the_glucocorticoid_receptor_overexpression_in_the_forebrain_(GRov)_during_different_periods_in_development_genotype_Overexpression_Nr3c1.mouse.nuclear.receptor.subfamily.3.group.C.member.1_Up	0.0155052	0.0682411	0.38073	1.60456	133
Gemma_GSE31063_Extinction_learning_timepoint_first.extinction.trial_Up	0.0295067	0.105361	0.352488	-1.47991	24
Gemma_GSE34424_The_Influence_of_Sleep_Deprivation_on_Hippocampal_CA1_Gene_Expression:_Relation_to_Stress_and_Aging_treatment_sleep.deprivation_24.h_Up	0.0290193	0.104112	0.352488	1.62318	23
Gemma_GSE50423_Contextual_fear_conditioning_in_the_mouse_hippocampus_timepoint_12.h_Down	0.00133765	0.00968315	0.45506	-1.40445	465
Gemma_GSE50423_Contextual_fear_conditioning_in_the_mouse_hippocampus_timepoint_4.h_Down	0.00121221	0.0089965	0.45506	-1.39961	416
Gemma_GSE50423_Contextual_fear_conditioning_in_the_mouse_hippocampus_treatment_contextual.fear.conditioning_Up	0.00379759	0.0221136	0.431708	-1.85359	10
Gemma_GSE5429_Hippocampal_gene_expression_profiling_across_8_inbred_strains:_towards_understanding_the_molecular_basis_of_behaviour_strain_SJL.J_Down	0.00232286	0.0150675	0.431708	-1.36935	480
Gemma_GSE60303_Genome-wide_analysis_of_stress-exposure-associated_and_exposure-related_individual_differences_associated_hippocampus_gene_expression_in_males_and_females._phenotype_minimal.response.to.predator.scent.stress_Down	0.0656115	0.194816	0.287805	-1.48035	32
Gemma_GSE60303_Genome-wide_analysis_of_stress-exposure-associated_and_exposure-related_individual_differences_associated_hippocampus_gene_expression_in_males_and_females._phenotype_minimal.response.to.predator.scent.stress_Up	0.000538871	0.0044827	0.477271	-1.79096	69
Gemma_GSE63412_RNA-seq_analysis_of_contextual_fear_conditioning_treatment_fear.conditioning_Up	1.06829e-11	2.7886e-10	0.875325	-2.41279	11
Gemma_GSE63412_RNA-seq_analysis_of_contextual_fear_conditioning_treatment_memory.retrieval_Up	1.06829e-11	2.7886e-10	0.875325	-2.41279	11
Gemma_GSE72343_Circuit-wide_transcriptional_profiling_reveals_region_specific_gene_co-expression_networks_regulating_depression_susceptibility_phenotype_resilient_Up	6.90426e-11	1.49329e-09	0.839089	2.65028	33
Gemma_GSE72343_Circuit-wide_transcriptional_profiling_reveals_region_specific_gene_co-expression_networks_regulating_depression_susceptibility_phenotype_susceptible_Up	6.90426e-11	1.49329e-09	0.839089	2.65028	33
Gemma_GSE72343_Circuit-wide_transcriptional_profiling_reveals_region_specific_gene_co-expression_networks_regulating_depression_susceptibility_timepoint_28.d_chronic.social.defeat.stress_Up	0.0013431	0.00968315	0.45506	-1.45634	359
Gemma_GSE73798_Molecular_profile_of_ketamine_in_comparison_to_memantine_and_phencyclidyne_and_other_psychotropic_drugs_[mouse_hippocampus]_timepoint_1.hour_Up	0.0623441	0.188026	0.287857	-1.3205	89
Gemma_GSE73798_Molecular_profile_of_ketamine_in_comparison_to_memantine_and_phencyclidyne_and_other_psychotropic_drugs_[mouse_hippocampus]_timepoint_8.hours_Up	0.00511146	0.0286621	0.407018	1.83882	68
Gemma_GSE73798_Molecular_profile_of_ketamine_in_comparison_to_memantine_and_phencyclidyne_and_other_psychotropic_drugs_[mouse_hippocampus]_treatment_15.mg.kg_memantine_Up	0.00793176	0.040029	0.38073	1.83688	26
Gemma_GSE73798_Molecular_profile_of_ketamine_in_comparison_to_memantine_and_phencyclidyne_and_other_psychotropic_drugs_[mouse_hippocampus]_treatment_20.mg.kg_ketamine_Up	0.0123347	0.0576381	0.38073	1.71172	20
Gemma_GSE73798_Molecular_profile_of_ketamine_in_comparison_to_memantine_and_phencyclidyne_and_other_psychotropic_drugs_[mouse_hippocampus]_treatment_5.mg.kg_phencyclidine_Up	0.00034172	0.00304332	0.498493	2.05527	21
Gemma_GSE74966_Genome-wide_maps_of_chromatin_changes_uppon_contextual_fear_conditioning_in_mice_(RNA-seq)_treatment_contextual.fear.conditioning_Down	0.0657619	0.194816	0.287805	1.54492	37
Gemma_GSE74966_Genome-wide_maps_of_chromatin_changes_uppon_contextual_fear_conditioning_in_mice_(RNA-seq)_treatment_contextual.fear.conditioning_Up	0.0397214	0.132463	0.321776	-1.38943	76
Gemma_GSE74966_Genome-wide_maps_of_chromatin_changes_uppon_contextual_fear_conditioning_in_mice_(RNA-seq)_treatment_electric.shock_contextual.fear.conditioning_Down	0.0657619	0.194816	0.287805	1.54492	37
Gemma_GSE74966_Genome-wide_maps_of_chromatin_changes_uppon_contextual_fear_conditioning_in_mice_(RNA-seq)_treatment_electric.shock_contextual.fear.conditioning_Up	0.0397214	0.132463	0.321776	-1.38943	76
Gemma_GSE81501_Hippocampal_gene_expression_signature_in_autistic_BTBR_mice_strain_BTBR.mouse_Up	0.026967	0.0986186	0.352488	1.44981	114
Gemma_GSE81672_Ketamine_and_Imipramine_Reverse_Transcriptional_Signatures_of_Susceptibility_and_Induce_Resilience-Specific_Gene_Expression_Profiles_HC_treatment_imipramine_Up	0.0028392	0.0171942	0.431708	1.90858	13
Gemma_GSE81672_Ketamine_and_Imipramine_Reverse_Transcriptional_Signatures_of_Susceptibility_and_Induce_Resilience-Specific_Gene_Expression_Profiles_HC_treatment_ketamine_Down	0.000676606	0.00533532	0.477271	2.05817	16
Gemma_GSE81672_Ketamine_and_Imipramine_Reverse_Transcriptional_Signatures_of_Susceptibility_and_Induce_Resilience-Specific_Gene_Expression_Profiles_NACC_treatment_imipramine_Up	0.000652285	0.00519768	0.477271	-1.88173	9
Gemma_GSE81672_Ketamine_and_Imipramine_Reverse_Transcriptional_Signatures_of_Susceptibility_and_Induce_Resilience-Specific_Gene_Expression_Profiles_NACC_treatment_ketamine_Up	5.91849e-06	6.68701e-05	0.610527	-2.19012	14
Gemma_GSE84302_RNA_sequencing_to_identify_common_targets_for_GSK3_treatment_10.ug.5.uL.nostril_siRNA_Knockdown_Gsk3b.mouse.glycogen.synthase.kinase.3.beta_Down	0.0680049	0.198763	0.287805	-1.39482	52
Gemma_GSE85136_Sex_Differences_in_Nucleus_Accumbens_Transcriptome_Profiles_Associated_with_Susceptibility_versus_Resilience_to_Subchronic_Variable_Stress_genotype_wild.type.genotype_Up	1.25158e-08	2.15329e-07	0.74774	-1.82067	411
Gemma_GSE88736_Transcriptomics_of_environmental_enrichment_and_cocaine_using_quantitative_next_generation_sequencing_environmental_history_environmental.enrichment_Up	9.27924e-07	1.32536e-05	0.659444	-2.22884	58
Gemma_GSE88736_Transcriptomics_of_environmental_enrichment_and_cocaine_using_quantitative_next_generation_sequencing_treatment_cocaine_Up	0.0259068	0.0966082	0.352488	-1.51506	42
GeneWeaver_Diaz2011_GS137248_Hippocampal genes differentially expressed between GF and SPF mice_Top25_byEffect	3.5422e-05	0.000383063	0.557332	2.24003	16
GeneWeaver_GeneNetwork Hippocampus Consortium_GS34200_Hippocampus Gene expression correlates of Number of entries into open arms of plus maze [Ethanol] in Females & Males BXD_Top25_byPval	0.0218479	0.0891692	0.352488	1.64408	19
GeneWeaver_GeneNetwork Hippocampus Consortium_GS34539_Hippocampus Gene expression correlates of Novel environment locomotion (activity beam breaks) 45-60 min in the periphery in Males_Top25_byPval	0.0515873	0.163396	0.282013	1.55644	17
GeneWeaver_GeneNetwork Hippocampus Consortium_GS34684_Hippocampus Gene expression correlates of Novel environment locomotion (cm) 45-60 min in the periphery in BXD Males_Top25_byPval	0.0224984	0.0891692	0.352488	1.64141	20
GeneWeaver_GeneNetwork Hippocampus Consortium_GS34790_Hippocampus Gene expression correlates of Open Field Novel TOTAL locomotion (activity beam breaks) in the center in BXD Females & Males_Top25_byPval	0.022636	0.0892472	0.352488	1.61946	8
GeneWeaver_Keeley_2006_GS137377_Upregulated transcriptional response to nonassociative and associative components of classical fear conditioning in the Hippocampus_Up_Top25_byPval	0.00262392	0.0163515	0.431708	-1.79903	22
GeneWeaver_Kim006_GS213206_Differentially expressed genes in common between both (A/J vs B6) AND (A/J vs C10 congenic lines) comparisons in P56 hippocampi contributing to anxiety-like behaviors_Top25_byEffect	0.0501002	0.160703	0.287857	1.58409	8
GeneWeaver_Rodd_2008_GS75564_Genes that were different in the nucleus accumbens of iP rats between the saccharin and water groups_Up_Pval01_Top25LogFC	0.0215886	0.0891692	0.352488	1.66492	23
Gray_2014_ChronicRestraintAndForcedSwimStress_Downregulated_HC	0.00132964	0.00968315	0.45506	1.5113	490
Gray_2014_ChronicRestraintAndForcedSwimStress_Upregulated_HC	0.0264095	0.0975218	0.352488	1.39131	294
Gray_2014_ForcedSwimStress_Downregulated_HC	0.0208713	0.0877754	0.352488	-1.49789	63
Gray_2014_ForcedSwimStress_Upregulated_HC	0.0223537	0.0891692	0.352488	1.5898	66
HAY_BONE_MARROW_CD34_POS_HSC	0.0436741	0.141894	0.321776	-1.38514	70
HAY_BONE_MARROW_CD34_POS_MKP	0.0614334	0.187361	0.237794	1.40688	53
HAY_BONE_MARROW_CD34_POS_MULTILIN	0.00537124	0.0298973	0.407018	-1.75184	16
HAY_BONE_MARROW_CD8_T_CELL	0.0425304	0.139297	0.321776	1.54881	38
HAY_BONE_MARROW_DENDRITIC_CELL	0.00246368	0.0155417	0.431708	1.78544	133
HAY_BONE_MARROW_EARLY_ERYTHROBLAST	1.13709e-06	1.56505e-05	0.643552	-2.16147	75
HAY_BONE_MARROW_FOLLICULAR_B_CELL	0.0328343	0.114016	0.321776	1.49696	92
HAY_BONE_MARROW_IMMATURE_NEUTROPHIL	2.07278e-06	2.61516e-05	0.627257	2.15859	160
HAY_BONE_MARROW_MONOCYTE	6.75844e-20	3.00949e-18	1.15122	2.9222	165
HAY_BONE_MARROW_NEUTROPHIL	1.2598e-10	2.57748e-09	0.826657	2.18751	359
HAY_BONE_MARROW_NK_CELLS	0.000838864	0.0064798	0.477271	1.73554	248
HAY_BONE_MARROW_PLASMA_CELL	0.0106201	0.0502465	0.38073	-1.54619	70
HU_FETAL_RETINA_MICROGLIA	1e-50	7.57e-49		3.39573	307
HU_FETAL_RETINA_PHOTORECEPTOR	0.0136378	0.0621918	0.38073	-1.58049	48
HU_FETAL_RETINA_RGC	1.13107e-11	2.85406e-10	0.875325	-2.0274	368
HU_FETAL_RETINA_RPE	0.0366569	0.124436	0.287857	1.35804	223
JIANG_AGING_CEREBRAL_CORTEX_DN	0.0589793	0.180758	0.321776	-1.44616	44
JOHANSSON_BRAIN_CANCER_EARLY_VS_LATE_DN	0.0253241	0.0949028	0.352488	1.66433	41
JOHANSSON_GLIOMAGENESIS_BY_PDGFB_DN	0.023532	0.0913525	0.352488	-1.62659	20
JOHNSTONE_PARVB_TARGETS_3_UP	2.19102e-06	2.71901e-05	0.627257	1.90967	361
Johnson_2016_Coexpression_Hippocampus_Human_M11	0.0014664	0.0104723	0.45506	-1.70592	121
Johnson_2016_Coexpression_Hippocampus_Human_M14	2.74261e-09	5.0638e-08	0.774939	2.56925	89
Johnson_2016_Coexpression_Hippocampus_Human_M16	3.28901e-05	0.000360838	0.557332	-1.93714	125
Johnson_2016_Coexpression_Hippocampus_Human_M18	0.0250437	0.0947904	0.352488	-1.56791	27
Johnson_2016_Coexpression_Hippocampus_Human_M19	0.00207881	0.0139262	0.431708	-1.37111	430
Johnson_2016_Coexpression_Hippocampus_Human_M21	0.0241827	0.0929255	0.352488	1.58731	79
Johnson_2016_Coexpression_Hippocampus_Human_M23	3.99732e-27	2.16141e-25	1.34993	3.17882	106
Johnson_2016_Coexpression_Hippocampus_Human_M3	0.066777	0.196693	0.287805	1.43014	126
Johnson_2016_Coexpression_Hippocampus_Human_M5	5.69188e-06	6.52841e-05	0.610527	-2.03536	121
Johnson_2016_Coexpression_Hippocampus_Human_M6	0.00804938	0.0403535	0.38073	-1.67462	22
Johnson_2016_Coexpression_Hippocampus_Human_M7	0.0044773	0.0256766	0.407018	-1.7054	41
Johnson_2016_Coexpression_Hippocampus_Human_M9	0.0201833	0.0858357	0.352488	1.53021	143
KIM_ALL_DISORDERS_CALB1_CORR_UP	1.04081e-13	3.42561e-12	0.954542	-2.0012	492
KIM_ALL_DISORDERS_DURATION_CORR_DN	9.03145e-08	1.39527e-06	0.704976	-2.15273	130
KIM_ALL_DISORDERS_OLIGODENDROCYTE_NUMBER_CORR_DN	0.033885	0.117128	0.321776	1.55872	21
KIM_BIPOLAR_DISORDER_OLIGODENDROCYTE_DENSITY_CORR_DN	0.0020123	0.0137235	0.431708	2.03296	34
LEE_AGING_CEREBELLUM_UP	0.00559546	0.030918	0.407018	1.82718	66
LEIN_NEURON_MARKERS	0.000311013	0.00280282	0.498493	-1.84733	63
LEIN_OLIGODENDROCYTE_MARKERS	0.0141204	0.064007	0.38073	-1.50086	69
LU_AGING_BRAIN_DN	0.0497049	0.160113	0.321776	-1.32028	135
LU_AGING_BRAIN_UP	0.0240123	0.0927414	0.352488	1.42773	233
MANNO_MIDBRAIN_NEUROTYPES_BASAL	0.00705646	0.0370954	0.407018	-1.64233	55
MANNO_MIDBRAIN_NEUROTYPES_HMGL	1e-50	7.57e-49		3.35938	468
MANNO_MIDBRAIN_NEUROTYPES_HNBML1	0.0147632	0.0653554	0.38073	-1.32778	272
MANNO_MIDBRAIN_NEUROTYPES_HOMTN	0.000138998	0.00134899	0.518848	-1.54663	319
MANNO_MIDBRAIN_NEUROTYPES_HOPC	0.00352919	0.02071	0.431708	-1.41045	304
MANNO_MIDBRAIN_NEUROTYPES_HRGL2C	0.0320933	0.111957	0.321776	-1.27661	262
MANNO_MIDBRAIN_NEUROTYPES_HSERT	0.0193757	0.0828669	0.352488	-1.25899	381
MARTORIATI_MDM4_TARGETS_NEUROEPITHELIUM_DN	0.0131381	0.0605764	0.38073	1.61689	133
MEISSNER_BRAIN_HCP_WITH_H3K4ME2_AND_H3K27ME3	0.00223201	0.0146924	0.431708	1.99533	28
MEISSNER_BRAIN_ICP_WITH_H3K4ME3	0.0308792	0.108723	0.352488	-1.5402	26
MODY_HIPPOCAMPUS_POSTNATAL	1.00636e-05	0.000112032	0.593325	-2.17126	53
MUELLER_METHYLATED_IN_GLIOBLASTOMA	0.0230051	0.0897674	0.352488	1.62976	17
Meckes_2018_WKYvsF344_Downregulated_HC	0.000115486	0.0011503	0.538434	1.70103	391
Microglia_All_Darmanis_PNAS_2015	5.16721e-14	1.77799e-12	0.965328	2.58049	18
Microglia_All_Zeisel_Science_2015	1e-50	7.57e-49		3.54477	314
Microglia_All_Zhang_JNeuro_2014	1.49963e-12	4.73007e-11	0.91012	2.66059	25
NGO_MALIGNANT_GLIOMA_1P_LOH	0.0252754	0.0949028	0.352488	-1.56068	13
NUTT_GBM_VS_AO_GLIOMA_UP	0.0376534	0.127248	0.321776	1.51161	43
Neuron_All_Darmanis_PNAS_2015	0.0570265	0.176922	0.271289	-1.46964	18
Neuron_All_Zhang_JNeuro_2014	0.00486447	0.0274806	0.407018	-1.75344	28
Neuron_CorticoStriatal_Doyle_Cell_2008	0.00277686	0.0169523	0.431708	1.88283	11
Neuron_Glutamate_Sugino_NatNeuro_2006	0.0070149	0.0370954	0.407018	-1.70331	47
Neuron_Pyramidal_Cortical_Zeisel_Science_2015	0.0521906	0.164618	0.321776	-1.27113	196
Oligodendrocyte_All_Cahoy_JNeuro_2008	0.0180679	0.0777123	0.352488	-1.5903	36
Oligodendrocyte_All_Zeisel_Science_2015	0.0023487	0.0150675	0.431708	-1.4427	341
Oligodendrocyte_Mature_Darmanis_PNAS_2015	0.0528324	0.165951	0.321776	-1.51926	17
POMEROY_MEDULLOBLASTOMA_PROGNOSIS_UP	0.0514979	0.163396	0.321776	-1.46368	39
Park_2011_Coexpression_Hippocampus_Mouse_cyan	0.0540958	0.169217	0.24134	1.38405	149
Park_2011_Coexpression_Hippocampus_Mouse_darkgrey	0.00683241	0.0364235	0.407018	-1.3688	327
Park_2011_Coexpression_Hippocampus_Mouse_lightcyan	0.0358651	0.122297	0.321776	-1.17799	493
Park_2011_Coexpression_Hippocampus_Mouse_magenta	6.39802e-12	1.79382e-10	0.887075	-2.14689	306
Park_2011_Coexpression_Hippocampus_Mouse_paleturquoise	0.0145342	0.0649041	0.38073	1.65942	44
Park_2011_Coexpression_Hippocampus_Mouse_royalblue	7.63137e-10	1.48127e-08	0.801216	-2.39912	93
Park_2011_Coexpression_Hippocampus_Mouse_saddlebrown	0.00922608	0.045511	0.38073	1.73562	52
Park_2011_Coexpression_Hippocampus_Mouse_skyblue	0.0210442	0.0880135	0.352488	-1.54082	48
Park_2011_Coexpression_Hippocampus_Mouse_violet	0.00182734	0.0126908	0.45506	-1.83184	43
Park_2011_Coexpression_Hippocampus_Mouse_yellow	0.0223096	0.0891692	0.352488	1.34733	475
RAMPON_ENRICHED_LEARNING_ENVIRONMENT_LATE_UP	0.0247787	0.0942588	0.352488	-1.61513	20
RHEIN_ALL_GLUCOCORTICOID_THERAPY_DN	5.38946e-06	6.27665e-05	0.610527	-1.69844	309
RHEIN_ALL_GLUCOCORTICOID_THERAPY_UP	0.00730393	0.0375906	0.407018	1.78995	53
Replicated_InternalizingBehavior_DifferentiallyExpressed_HC	0.000970197	0.00741858	0.477271	1.70301	271
STARK_PREFRONTAL_CORTEX_22Q11_DELETION_DN	8.52371e-37	4.96342e-35	1.57637	-2.757	459
STARK_PREFRONTAL_CORTEX_22Q11_DELETION_UP	0.0281623	0.101791	0.352488	1.47055	172
VERHAAK_GLIOBLASTOMA_MESENCHYMAL	7.47475e-25	3.77226e-23	1.29512	3.0517	180
VERHAAK_GLIOBLASTOMA_NEURAL	0.000110751	0.00111785	0.538434	-1.85889	109
VERHAAK_GLIOBLASTOMA_PRONEURAL	0.0263886	0.0975218	0.352488	-1.36492	155
Wilhelm_2013_FlindersSensitiveLine_Downregulated_HC	0.000175346	0.00163873	0.518848	2.04886	95
ZHONG_PFC_C1_ASTROCYTE	0.00739894	0.0375906	0.407018	-1.70548	23
ZHONG_PFC_C3_MICROGLIA	3.13387e-06	3.7176e-05	0.627257	-1.63378	412
ZHONG_PFC_C9_ORG_OTHER	0.00204623	0.0138303	0.431708	-1.69716	75
ZHONG_PFC_MAJOR_TYPES_ASTROCYTES	0.000537325	0.0044827	0.477271	-1.53657	279
ZHONG_PFC_MAJOR_TYPES_MICROGLIA	4.01219e-46	2.76112e-44	1.7683	3.16893	363
ZHONG_PFC_MAJOR_TYPES_OPC	0.00179965	0.0126142	0.45506	-1.65844	79

## Sheet: spleen_hallmark
pathway	pval	padj	log2err	NES	size
Adipogenesis	1.7513e-08	8.75652e-08	0.733762	2.02028	182
Androgen Response	0.0518934	0.086489	0.234393	1.36243	82
Apical Junction	0.0309432	0.0618864	0.352488	-1.32474	147
Apoptosis	0.00998164	0.0226856	0.38073	1.44549	136
Cholesterol Homeostasis	0.00837407	0.0209352	0.38073	1.62039	62
Coagulation	0.0705219	0.113745	0.199915	1.32736	84
Dna Repair	0.000115208	0.000384027	0.538434	1.73299	137
E2f Targets	2.09955e-44	1.04977e-42	1.73878	3.21624	189
Epithelial Mesenchymal Transition	0.0110185	0.0239532	0.38073	1.44419	137
Estrogen Response Late	0.0795756	0.116648	0.181383	1.27346	144
Fatty Acid Metabolism	0.0493333	0.0850575	0.234393	1.32853	126
G2m Checkpoint	1.49915e-34	3.74789e-33	1.52971	3.02827	185
Glycolysis	9.86741e-08	4.48519e-07	0.704976	2.03078	157
Heme Metabolism	5.26501e-10	2.925e-09	0.801216	2.13024	176
Hypoxia	0.00963812	0.0226856	0.38073	1.42486	158
Il2 Stat5 Signaling	0.0322581	0.0620347	0.287857	1.3527	176
Il6 Jak Stat3 Signaling	0.100852	0.140073	0.165657	1.26962	75
Inflammatory Response	0.0460526	0.0822368	0.24134	1.33174	165
Interferon Alpha Response	2.29841e-11	1.64172e-10	0.863415	-2.59353	85
Interferon Gamma Response	1.72218e-07	7.17576e-07	0.690132	-1.99801	168
Kras Signaling Dn	0.0381704	0.070686	0.321776	-1.38458	81
Mitotic Spindle	4.10923e-06	1.58047e-05	0.610527	1.79529	190
Mtorc1 Signaling	1.6466e-20	2.05825e-19	1.16907	2.59793	189
Myc Targets V1	1.31096e-29	2.18493e-28	1.40995	2.92825	183
Myc Targets V2	1.38688e-10	8.66798e-10	0.826657	2.52477	55
Myogenesis	0.0760578	0.116648	0.287805	-1.23447	123
Oxidative Phosphorylation	2.42901e-20	2.42901e-19	1.16907	2.63362	183
Protein Secretion	0.0184461	0.0384294	0.352488	1.45995	89
Reactive Oxygen Species Pathway	0.00699976	0.0184204	0.407018	1.67471	46
Spermatogenesis	0.00032584	0.00101825	0.498493	1.80209	76
Tgf Beta Signaling	0.0816534	0.116648	0.287805	-1.37418	46
Tnfa Signaling Via Nfkb	0.00437818	0.0121616	0.407018	1.4851	175
Unfolded Protein Response	1.01687e-13	8.47389e-13	0.954542	2.51462	105
Uv Response Dn	0.0798352	0.116648	0.287805	-1.18812	128
Uv Response Up	0.000564842	0.0016613	0.477271	1.66158	130
Xenobiotic Metabolism	6.32238e-05	0.000225799	0.538434	1.77472	136

## Sheet: spleen_go
pathway	pval	padj	log2err	NES	size	GO_ID	GO_Domain
Activation Of Immune Response	0.00147135	0.0305117	0.45506	-1.319	458	GO:0002253	BP
Activation Of Protein Kinase Activity	0.0206633	0.185169	0.352488	1.51095	43	GO:0032147	BP
Activin Receptor Signaling Pathway	0.00104002	0.0234457	0.45506	-1.91028	27	GO:0032924	BP
Adaptive Immune Response	0.000302111	0.00837521	0.498493	-1.45986	359	GO:0002250	BP
[truncated: 1,214 more rows]

[truncated: 1 more sheets: spleen_immune]
