# Supplementary material for: Vagus nerve stimulation modulates LPS-induced epileptogenicity: the role of inflammation suppression
Source: Research Square preprint supplement (doi:10.21203/rs.3.rs-8896240/v1), 2026-04-20
Supplement: Supplementary file 3 [file a7a1da0515a254bcac7083a4.xlsx]

## Sheet: cortex_hallmark
pathway	pval	padj	log2err	NES	size

## Sheet: cortex_go
pathway	pval	padj	log2err	NES	size

## Sheet: cortex_immune
pathway	pval	padj	log2err	NES	size

## Sheet: cortex_Hagenaeur_Brain
pathway	pval	padj	log2err	NES	size
ASTON_MAJOR_DEPRESSIVE_DISORDER_DN	0.00116431	0.0630391	0.45506	-1.85552	138
Bagot_2016_StressSusceptibleVsCTRL_HC	2.07006e-05	0.00392277	0.57561	-2.17618	23
DESCARTES_FETAL_CEREBRUM_OLIGODENDROCYTES	0.000162903	0.0124512	0.518848	-2.15036	32
DESCARTES_MAIN_FETAL_OLIGODENDROCYTES	0.000164264	0.0124512	0.518848	-2.01893	57
DURANTE_ADULT_OLFACTORY_NEUROEPITHELIUM_B_CELLS	0.00056245	0.0355281	0.477271	2.1987	20
DURANTE_ADULT_OLFACTORY_NEUROEPITHELIUM_OLFACTORY_ENSHEATHING_GLIA	0.0014885	0.0663698	0.45506	-1.953	89
DropViz_HC_Oligodendrocyte_Tfr_cluster-markers.csv	3.08693e-06	0.000779964	0.627257	-2.02117	89
DropViz_STR_Oligodendrocytes_Tfr_cluster-markers.csv	6.94203e-07	0.000263103	0.659444	-1.96519	118
FAN_EMBRYONIC_CTX_BIG_GROUPS_BRAIN_IMMUNE	0.00464419	0.176015	0.407018	-1.88982	106
FLORIO_NEOCORTEX_BASAL_RADIAL_GLIA_DN	5.52835e-05	0.00698415	0.557332	-1.89845	142
Gemma_GSE156925_TRAP-Seq_uncovers_post-transcriptional_gene_regulation_after_acute_sleep_deprivation_treatment_Sleep.deprivation_Down	0.00407801	0.162691	0.407018	2.15329	56
Gemma_GSE72343_Circuit-wide_transcriptional_profiling_reveals_region_specific_gene_co-expression_networks_regulating_depression_susceptibility_timepoint_28.d_chronic.social.defeat.stress_1.h_aggressor.re.exposure_Up	0.002052	0.0864122	0.431708	1.72949	293
GeneWeaver_LoIaocona_2016_GS400101_Down-regulated genes in S-S (Social Stress) mice_Top25_byPval	0.00532381	0.183429	0.407018	-2.1195	20
LEIN_OLIGODENDROCYTE_MARKERS	0.000113502	0.0122906	0.538434	-1.96493	69
MANNO_MIDBRAIN_NEUROTYPES_HPROGBP	0.00145721	0.0663698	0.45506	-1.74992	218
Mural_Pericyte_Zhang_JNeuro_2014	0.00507107	0.183042	0.407018	-2.09503	38
Oligodendrocyte_All_Cahoy_JNeuro_2008	4.70739e-07	0.000263103	0.674963	-2.16086	36
Oligodendrocyte_Mature_Darmanis_PNAS_2015	0.00142376	0.0663698	0.45506	-2.12902	17
Oligodendrocyte_Myelinating_Zhang_JNeuro_2014	0.000886968	0.0517171	0.477271	-2.12564	34
Park_2011_Coexpression_Hippocampus_Mouse_skyblue	3.23486e-05	0.00490405	0.557332	-2.0789	48
ZHENG_GLIOBLASTOMA_PLASTICITY_UP	0.000149901	0.0124512	0.518848	-1.81194	217
ZHONG_PFC_C4_PTGDS_POS_OPC	0.000392738	0.0270632	0.498493	-1.87177	132

## Sheet: hippocampus_hallmark
pathway	pval	padj	log2err	NES	size
Heme Metabolism	0.00781127	0.195282	0.407018	-2.13052	167
Pancreas Beta Cells	0.000307886	0.0153943	0.498493	-2.39059	23

## Sheet: hippocampus_go
pathway	pval	padj	log2err	NES	size

## Sheet: hippocampus_immune
pathway	pval	padj	log2err	NES	size

## Sheet: hippocampus_Hagenaeur_Brain
pathway	pval	padj	log2err	NES	size

## Sheet: spleen_hallmark
pathway	pval	padj	log2err	NES	size
Dna Repair	0.00823164	0.068597	0.38073	-1.64931	137
E2f Targets	1.94438e-06	4.86096e-05	0.627257	-2.09565	189
G2m Checkpoint	0.00787579	0.068597	0.38073	-1.55347	185
Interferon Alpha Response	0.00167877	0.0209846	0.45506	-1.94182	85
Myc Targets V1	1.1351e-07	5.67552e-06	0.704976	-2.2583	183
Myc Targets V2	0.00016454	0.00274233	0.518848	-2.12925	55
Peroxisome	0.0244111	0.174365	0.352488	-1.56948	81

## Sheet: spleen_go
pathway	pval	padj	log2err	NES	size	GO_ID	GO_Domain
3 Utr Mediated Mrna Destabilization	0.00020502	0.0663241	0.518848	-2.01313	14	GO:0061158	BP
Aerobic Electron Transport Chain	0.00188455	0.174186	0.45506	-1.83456	48	GO:0019646	BP
Amino Acid Activation	0.000569149	0.107757	0.477271	-1.91782	42	GO:0043038	BP
Amino Acid Metabolic Process	6.62528e-05	0.0329735	0.538434	-1.92078	204	GO:0006520	BP
Aromatic Amino Acid Metabolic Process	0.000926829	0.137161	0.477271	-1.93501	20	GO:0009072	BP
Atp Synthesis Coupled Electron Transport	0.0024707	0.19587	0.431708	-1.73387	59	GO:0042773	BP
Base Excision Repair	0.00187013	0.174186	0.45506	-1.84249	36	GO:0006284	BP
Cardiac Muscle Cell Proliferation	0.000428356	0.0923821	0.498493	2.75924	42	GO:0060038	BP
Copper Ion Transmembrane Transport	0.00106961	0.141451	0.45506	-1.82192	9	GO:0035434	BP
Copper Ion Transport	0.00217706	0.188854	0.431708	-1.87803	13	GO:0006825	BP
Cytoplasmic Translation	0.000966365	0.137161	0.477271	-1.78071	129	GO:0002181	BP
Dna Replication	1.92797e-06	0.00623697	0.627257	-1.90279	250	GO:0006260	BP
Dna Replication Initiation	0.00140344	0.163314	0.45506	-1.90086	31	GO:0006270	BP
Dna Templated Dna Replication	1.64598e-05	0.0118328	0.57561	-2.07223	139	GO:0006261	BP
Electron Transport Chain	0.00218756	0.188854	0.431708	-1.75979	83	GO:0022900	BP
Embryonic Pattern Specification	0.000303778	0.0818935	0.498493	2.80229	40	GO:0009880	BP
Ephrin Receptor Signaling Pathway	0.00181031	0.174186	0.45506	2.75639	51	GO:0048013	BP
Erythrose 4 Phosphate Phosphoenolpyruvate Family Amino Acid Metabolic Process	0.000590361	0.107757	0.477271	-1.95078	14	GO:1902221	BP
Fatty Acid Beta Oxidation	0.000599577	0.107757	0.477271	-1.81869	61	GO:0006635	BP
Free Ubiquitin Chain Polymerization	0.000158899	0.0611227	0.518848	-1.82801	7	GO:0010994	BP
Gas Transport	0.000320596	0.0829702	0.498493	2.00646	9	GO:0015669	BP
Histamine Production Involved In Inflammatory Response	0.00219098	0.188854	0.431708	1.86485	9	GO:0002349	BP
Indolalkylamine Metabolic Process	0.00171675	0.171756	0.45506	-1.80119	9	GO:0046219	BP
Indole Containing Compound Metabolic Process	0.00094754	0.137161	0.477271	-1.92369	14	GO:0042430	BP
Isocitrate Metabolic Process	0.00224156	0.188854	0.431708	-1.72076	6	GO:0006102	BP
Lipid Oxidation	0.00239997	0.194098	0.431708	-1.66367	91	GO:0034440	BP
Lymphocyte Costimulation	0.000514191	0.100946	0.477271	2.6534	27	GO:0031294	BP
Maintenance Of Organelle Location	0.000350937	0.0873294	0.498493	-1.91764	11	GO:0051657	BP
Maturation Of 5 8s Rrna	0.0002524	0.0710012	0.498493	-2.05944	33	GO:0000462	BP
Maturation Of 5 8s Rrna From Tricistronic Rrna Transcript Ssu Rrna 5 8s Rrna Lsu Rrna	0.000378931	0.0883593	0.498493	-2.03645	22	GO:0016072	BP
Maturation Of Ssu Rrna	5.23653e-05	0.0282336	0.557332	-2.04873	49	GO:0030490	BP
Maturation Of Ssu Rrna From Tricistronic Rrna Transcript Ssu Rrna 5 8s Rrna Lsu Rrna	0.00248243	0.19587	0.431708	-1.88143	33	GO:0030490	BP
Mesenchymal Cell Migration	0.000875686	0.137161	0.477271	2.74504	34	GO:0090497	BP
Mirna Mediated Gene Silencing By Mrna Destabilization	0.00220626	0.188854	0.431708	-1.72172	6	GO:0035279	BP
Modulation Of Excitatory Postsynaptic Potential	0.00136774	0.163314	0.45506	-1.93231	33	GO:0098815	BP
Myelin Assembly	0.000382389	0.0883593	0.498493	-1.98383	20	GO:0032288	BP
Myosin Filament Organization	0.000945556	0.137161	0.477271	1.87323	6	GO:0031033	BP
Negative Regulation Of Excitatory Postsynaptic Potential	4.87229e-05	0.0282336	0.557332	-1.90596	8	GO:0090394	BP
Negative Regulation Of Gene Expression Epigenetic	0.00237707	0.194098	0.431708	-1.59844	151	GO:0045814	BP
Negative Regulation Of Muscle Cell Apoptotic Process	0.00103912	0.141451	0.45506	2.72058	52	GO:0010656	BP
Negative Regulation Of Receptor Internalization	0.000837733	0.137161	0.477271	-1.90766	12	GO:0002091	BP
Negative Regulation Of Receptor Mediated Endocytosis	0.00213132	0.188854	0.431708	-1.8502	20	GO:0048261	BP
Negative Regulation Of Smooth Muscle Cell Apoptotic Process	0.000415042	0.0923821	0.498493	2.3074	13	GO:0034392	BP
Neural Crest Cell Differentiation	0.000785175	0.133686	0.477271	2.70118	57	GO:0014033	BP
Neuron Projection Arborization	1.20533e-05	0.0107273	0.593325	-2.16881	27	GO:0140058	BP
Nucleoside Phosphate Biosynthetic Process	0.00161736	0.171756	0.45506	-1.5449	265	GO:1901293	BP
One Carbon Compound Transport	0.00224757	0.188854	0.431708	-1.83874	10	GO:0019755	BP
Organic Acid Catabolic Process	0.001181	0.152821	0.45506	-1.68883	173	GO:0016054	BP
Positive Regulation Of Establishment Of Protein Localization To Telomere	0.00186074	0.174186	0.45506	-1.79611	9	GO:1904851	BP
Positive Regulation Of Leukocyte Proliferation	0.000913317	0.137161	0.477271	2.49092	129	GO:0070665	BP
Positive Regulation Of Podosome Assembly	0.00133235	0.162647	0.45506	1.90869	9	GO:0071803	BP
Positive Regulation Of Protein Localization To Chromosome Telomeric Region	0.0015427	0.169174	0.45506	-1.87506	12	GO:1904816	BP
Post Transcriptional Gene Silencing	0.00151478	0.168977	0.45506	-1.7807	59	GO:0016441	BP
Premeiotic Dna Replication	0.000249998	0.0710012	0.498493	-1.80838	6	GO:0006279	BP
Presynapse Assembly	0.00022018	0.0678364	0.518848	2.619	25	GO:0099054	BP
Presynapse Organization	0.00123227	0.156329	0.45506	2.7639	35	GO:0099172	BP
Protein K27 Linked Ubiquitination	0.000198712	0.0663241	0.518848	-1.95671	10	GO:0044314	BP
Protein Rna Complex Organization	0.00168517	0.171756	0.45506	-1.70232	175	GO:0071826	BP
Proton Motive Force Driven Atp Synthesis	0.00172553	0.171756	0.45506	-1.72727	61	GO:0015986	BP
Receptor Catabolic Process	0.000752116	0.131519	0.477271	-2.00098	28	GO:0032801	BP
Regulation Of Myofibroblast Differentiation	0.00231216	0.19179	0.431708	-1.71834	6	GO:1904760	BP
Regulation Of Neuron Projection Arborization	1.32641e-05	0.0107273	0.593325	-2.04854	11	GO:0150011	BP
Regulation Of Phosphatidylinositol Dephosphorylation	0.000514872	0.100946	0.477271	-1.75043	5	GO:0060304	BP
Regulation Of Phospholipid Metabolic Process	0.00107127	0.141451	0.45506	-1.93297	26	GO:1903725	BP
Regulation Of Receptor Catabolic Process	1.27503e-05	0.0107273	0.593325	-2.04948	11	GO:2000644	BP
Regulatory Ncrna Mediated Gene Silencing	0.00166487	0.171756	0.45506	-1.8885	99	GO:0031047	BP
Ribonucleoprotein Complex Biogenesis	3.51805e-06	0.00758725	0.627257	-1.82234	409	GO:0022613	BP
Ribosomal Large Subunit Biogenesis	0.00254768	0.198596	0.431708	-1.75971	57	GO:0042273	BP
Ribosomal Small Subunit Biogenesis	0.000160601	0.0611227	0.518848	-2.01758	97	GO:0042274	BP
Ribosome Biogenesis	3.43733e-05	0.0222395	0.557332	-1.80403	291	GO:0042254	BP
Rrna Metabolic Process	1.36525e-07	0.000883317	0.690132	-2.08896	227	GO:0016072	BP
Rrna Processing	5.13813e-06	0.00831093	0.610527	-2.03091	197	GO:0006364	BP
Smooth Muscle Cell Apoptotic Process	0.00168499	0.171756	0.45506	2.64969	29	GO:0034390	BP
Snrna Metabolic Process	0.00141354	0.163314	0.45506	-1.8312	49	GO:0016073	BP
Snrna Processing	0.00178593	0.174186	0.45506	-1.87399	31	GO:0016180	BP
Stem Cell Development	0.000975176	0.137161	0.477271	2.72258	52	GO:0048864	BP
Striated Muscle Cell Proliferation	0.000457654	0.0955168	0.498493	2.74627	60	GO:0014855	BP
Succinate Metabolic Process	0.000190452	0.0663241	0.518848	1.97614	7	GO:0006105	BP
Succinyl Coa Metabolic Process	0.00148857	0.168966	0.45506	2.08488	10	GO:0006104	BP
Transposable Element Silencing By Mrna Destabilization	9.80042e-05	0.0452919	0.538434	-1.79012	5	GO:0141008	BP
Transposition	0.000146263	0.0611227	0.518848	-2.03886	21	GO:0032196	BP
Tricarboxylic Acid Metabolic Process	0.00130606	0.162504	0.45506	-1.90319	14	GO:0072350	BP
Vesicle Targeting To From Or Within Golgi	8.9701e-06	0.0107273	0.593325	2.65025	25	GO:0048199	BP
90s Preribosome	0.00308816	0.115205	0.431708	-1.91998	25	GO:0030686	CC
Brisc Complex	0.00976099	0.166194	0.38073	-1.6438	6	GO:0070552	CC
Catalytic Step 2 Spliceosome	0.00491711	0.12254	0.407018	-1.84249	81	GO:0071013	CC
Chaperonin Containing T Complex	0.00359873	0.115293	0.431708	-1.77179	8	GO:0005832	CC
Cmg Complex	0.00303158	0.115205	0.431708	-1.82022	11	GO:0071162	CC
Copi Coated Vesicle	0.00946926	0.166194	0.38073	2.50894	29	GO:0030137	CC
Copi Coated Vesicle Membrane	0.00319645	0.115205	0.431708	2.36464	17	GO:0030663	CC
Copi Vesicle Coat	0.000270067	0.058402	0.498493	2.22744	11	GO:0030126	CC
Corvet Complex	0.00467991	0.12254	0.407018	-1.7237	7	GO:0033263	CC
Cytosolic Large Ribosomal Subunit	0.00625137	0.125696	0.407018	-1.87095	39	GO:0022625	CC
Cytosolic Translation Preinitiation Complex	0.0035319	0.115293	0.431708	-1.8453	17	GO:0070993	CC
Dense Fibrillar Component	0.0054854	0.12545	0.407018	-1.69025	6	GO:0001651	CC
Dna Replication Factor A Complex	0.00990207	0.166194	0.38073	-1.73922	13	GO:0005662	CC
Dna Replication Preinitiation Complex	0.00554482	0.12545	0.407018	-1.76087	12	GO:0031261	CC
Endopeptidase Complex	0.00495827	0.12254	0.407018	-1.7754	87	GO:1905369	CC
Eukaryotic Translation Initiation Factor 2 Complex	0.00408422	0.118528	0.407018	1.71478	5	GO:0005850	CC
Eukaryotic Translation Initiation Factor 3 Complex	0.00686998	0.132056	0.407018	-1.73315	12	GO:0005852	CC
Eukaryotic Translation Initiation Factor 3 Complex Eif3m	0.0063938	0.125696	0.407018	-1.72574	8	GO:0071541	CC
Gid Complex	0.0132872	0.199903	0.38073	-1.58309	5	GO:0034657	CC
Inner Mitochondrial Membrane Protein Complex	0.0134039	0.199903	0.38073	-1.71118	42	GO:0098800	CC
Large Ribosomal Subunit	0.00601039	0.125696	0.407018	-1.72087	93	GO:0015934	CC
Mcm Complex	0.000549225	0.0602914	0.477271	-1.95392	11	GO:0042555	CC
Membrane Microdomain	0.00411078	0.118528	0.407018	2.26484	240	GO:0098857	CC
Mitochondrial Matrix	0.00017577	0.0506805	0.518848	-1.71633	343	GO:0005759	CC
Mitochondrial Protein Containing Complex	0.000400376	0.0602914	0.498493	-1.86483	160	GO:0098798	CC
Mitochondrial Small Ribosomal Subunit	0.0115959	0.179116	0.38073	-1.75258	27	GO:0005763	CC
Myosin Filament	0.00175576	0.115205	0.45506	-1.83131	8	GO:0032982	CC
Nuclear Chromosome	0.000904517	0.0782407	0.477271	-1.75757	199	GO:0000228	CC
Nuclear Exosome Rnase Complex	0.0103723	0.166194	0.38073	-1.74186	14	GO:0000176	CC
Nuclear Replication Fork	0.00303114	0.115205	0.431708	-1.86925	38	GO:0043596	CC
Nuclear Ubiquitin Ligase Complex	0.0105656	0.166194	0.38073	-1.74001	44	GO:0000152	CC
Nucleoid	0.00707287	0.132121	0.407018	-1.81736	47	GO:0009295	CC
Nurd Complex	0.0105673	0.166194	0.38073	-1.74448	15	GO:0016581	CC
Oxidoreductase Complex	0.00239414	0.115205	0.431708	-1.82938	113	GO:1990204	CC
Peptidase Complex	0.000421001	0.0602914	0.498493	-1.82823	112	GO:1905368	CC
Pole Plasm	0.000627309	0.0602914	0.477271	-2.05673	14	GO:0045495	CC
Preribosome	2.06565e-05	0.0178679	0.57561	-2.18571	97	GO:0030684	CC
Preribosome Small Subunit Precursor	0.00162333	0.115205	0.45506	-1.92234	13	GO:0030688	CC
Presynaptic Membrane	0.00580116	0.12545	0.407018	2.50114	136	GO:0042734	CC
Proteasome Accessory Complex	0.00717883	0.132121	0.407018	-1.84682	24	GO:0022624	CC
Proteasome Complex	0.00406486	0.118528	0.407018	-1.92469	62	GO:0000502	CC
Proteasome Core Complex	0.00882356	0.159008	0.38073	-1.74869	17	GO:0005839	CC
Proteasome Regulatory Particle Base Subcomplex	0.00512635	0.123175	0.407018	-1.77244	12	GO:0008540	CC
Protein Dna Complex	0.000168293	0.0506805	0.518848	-1.90358	144	GO:0032993	CC
Replication Fork	0.000621232	0.0602914	0.477271	-2.01299	66	GO:0005657	CC
Replisome	0.00192442	0.115205	0.45506	-1.93763	22	GO:0030894	CC
Respiratory Chain Complex	0.00304864	0.115205	0.431708	-1.79862	86	GO:0098803	CC
Ribosome	0.00611363	0.125696	0.407018	-1.56012	189	GO:0005840	CC
Rna Polymerase Complex	0.0022119	0.115205	0.431708	-1.78652	92	GO:0030880	CC
Rna Polymerase Ii Core Complex	0.00106042	0.0833878	0.45506	-2.01348	14	GO:0005665	CC
Rna Polymerase Ii Holoenzyme	0.002584	0.115205	0.431708	-1.88246	64	GO:0016591	CC
Small Subunit Processome	0.00286051	0.115205	0.431708	-1.87552	66	GO:0032040	CC
Sperm Annulus	0.00490404	0.12254	0.407018	1.84302	8	GO:0097227	CC
Tricarboxylic Acid Cycle Heteromeric Enzyme Complex	0.00568201	0.12545	0.407018	2.04585	14	GO:0045239	CC
U2 Type Spliceosomal Complex	0.00458631	0.12254	0.407018	-1.67144	89	GO:0005684	CC
U4 Snrnp	0.00209158	0.115205	0.431708	-1.80295	9	GO:0005687	CC
U7 Snrnp	0.0104632	0.166194	0.38073	-1.63817	6	GO:0005683	CC
Zona Pellucida Receptor Complex	0.00350612	0.115293	0.431708	-1.80775	11	GO:0002199	CC
3 5 Dna Helicase Activity	0.000462087	0.0516827	0.498493	-2.02436	45	GO:0043138	MF
Atp Dependent Activity	5.61561e-09	6.05537e-06	0.761461	-1.94024	487	GO:0140657	MF
Atp Dependent Activity Acting On Dna	0.000110192	0.0178021	0.538434	-1.97403	104	GO:0008094	MF
Atp Dependent Activity Acting On Rna	7.06202e-05	0.0146688	0.538434	-2.17807	60	GO:0008186	MF
Atp Hydrolysis Activity	1.24939e-08	6.05537e-06	0.74774	-2.08841	319	GO:0016887	MF
Basal Transcription Machinery Binding	0.00182561	0.132722	0.45506	-1.87139	56	GO:0001098	MF
Catalytic Activity Acting On Dna	8.34857e-05	0.0151735	0.538434	-1.85439	225	GO:0140097	MF
Catalytic Activity Acting On Rna	1.12799e-08	6.05537e-06	0.74774	-2.06103	336	GO:0140098	MF
Dna Helicase Activity	0.00077451	0.0804384	0.477271	-1.97431	69	GO:0003678	MF
Ephrin Receptor Binding	0.00121107	0.110056	0.45506	2.52578	24	GO:0046875	MF
Exonuclease Activity	0.00300323	0.189856	0.431708	-1.77205	73	GO:0004527	MF
Isomerase Activity	0.000257489	0.0374389	0.498493	-1.69371	341	GO:0016853	MF
Ligase Activity Forming Carbon Oxygen Bonds	0.00154774	0.118443	0.45506	-1.97008	38	GO:0016875	MF
Macromolecular Conformation Isomerase Activity	8.98399e-07	0.000261254	0.659444	-2.09571	222	GO:0120543	MF
Metal Dependent Deubiquitinase Activity	0.00266515	0.176142	0.431708	-1.87231	8	GO:0140492	MF
Metallochaperone Activity	0.00143627	0.116018	0.45506	-1.97847	12	GO:0016530	MF
Nucleic Acid Conformation Isomerase Activity	1.22038e-07	4.43609e-05	0.690132	-2.28658	148	GO:0120545	MF
Nucleosome Binding	0.000328706	0.043449	0.498493	-2.07837	40	GO:0031491	MF
Oxidoreductase Activity Acting On The Ch Ch Group Of Donors	0.00198621	0.137521	0.431708	-1.84556	51	GO:0016627	MF
Polyubiquitin Modification Dependent Protein Binding	0.000837393	0.0811713	0.477271	-1.9502	57	GO:0031593	MF
Rrna Binding	0.000381732	0.0462532	0.498493	-1.95596	62	GO:0019843	MF
Single Stranded Dna Helicase Activity	6.8951e-05	0.0146688	0.538434	-2.15052	54	GO:0017116	MF
Structural Constituent Of Ribosome	0.00136564	0.116018	0.45506	-1.82364	126	GO:0003735	MF

[truncated: 1 more sheets: spleen_immune]
